# Supplementary material
Source: PubMed Central journal article supplement (PMC5127665)
Supplement: jci-126-87105-s001.pdf [file jci-126-87105-s001.pdf]

## **Extended methods**

### **Immunohistochemistry**

HepG-2, SMMC-7721, and 293T cells were obtained from Cell Resource Center of Shanghai Institute for Biological Science, Chinese Academy Science, Shanghai, China. HUVEC cells were kindly provided by Prof. Ping-Jin Gao at Institute of Health Sciences (Shanghai, China). All these cell lines were cultured in DMEM with 10% FBS. MDA-MB-231 cell line was kindly provided by Prof. Ming-Yao Liu (East China Normal University, Shanghai, China) and was cultured in Leibovitz L-15 medium with 10% FBS. All these cell lines were originally purchased from ATCC. MDA-MB-231, SMMC-7721 or HepG2 cells were grown on coverslips in 24-well plates and fixed in either 4% paraformaldehyde or pre-chilled methanol (-20 °C) for 10 min. In some cases, WT or VPS33B-null Lin<sup>-</sup>Sca-1<sup>+</sup>c-Kit<sup>+</sup>Flk2<sup>-</sup>CD34<sup>-</sup> LT-HSCs were collected by flow cytometry and fixed for immunofluorescence staining. Cells were then blocked with 3% BSA in PBS for 60 min followed by incubation with primary antibodies overnight. The antibodies used were anti-HA (Sigma), anti-Flag (Sigma), anti-VPS33B (Sigma), anti-VPS16B (Abcam), anti-GDI2 (Proteintech), anti-LAMP1 (Proteintech), anti-FLOT1 (Abways), anti-CD63 (Proteintech), anti-ANGPTL2 (R&D system), anti-ANGPTL3 (R&D system), anti-TPO (Abways), anti-GLUT1 (Proteintech), anti-LDHA (Proteintech), anti-PKM2 (CST), anti-RAB11A (Abways), anti-RAB27A (Abways) and anti-V5 (Biodragon). Fluorescent-conjugated secondary antibodies (Alexa Fluor® 488 or Alexa Fluor® 555) against mouse, rabbit, or goat were obtained from the Thermo Scientific Inc. The details for all the antibodies are listed in Table S3. DAPI was included in all staining to evaluate nuclear morphology. Microscopy was performed using a Nikon A1 confocal microscope. For the statistics, five independent experiments with 30 fields each, 30-50 of cells per field, were quantified for the voxel overlap of  $\alpha$ -tubulin or VPS33B with TPO, ANGPTL2 and ANGPTL3 according to the method described in previous study (60).

### **Co-immunoprecipitation, Mass Spectrometry and Immunoblot analysis**

Full-length VPS33B with an HA tag was transfected into 293T cells followed by co-immunoprecipitation with anti-HA conjugated agarose-beads (Thermo Pierce). Immunoprecipitated samples were separated on a SDS-PAGE gel and stained with

Coomassie Blue. The specific bands were subjected to mass spectrometry analysis at Shanghai Applied Protein Technology Ltd. (Shanghai, China). The identified protein candidates that interacted with VPS33B (GDI2 [with StrepII tag], VPS16B, FLOT1, RAB11A [with Fc tag], RAB27A [with Fc tag], IGFBP2 [with Fc tag], TPO [with Fc tag], ANGPTL2 [with Fc tag] and ANGPTL 3 [with Fc tag]) were further confirmed by co-immunoprecipitation experiments. Knockdown efficiencies for shRNAs targeting human VPS33B and mouse GDI2 were also confirmed by immunoblot analysis. Briefly, whole cell lysates or immunoprecipitation samples were electrophoresed on 8-10% sodium dodecyl sulfate-polyacrylamide gels and transferred onto polyvinylidene difluoride membranes (Millipore). The membranes were incubated with primary antibodies overnight at 4 °C followed by incubation with appropriate horseradish peroxidase-conjugated secondary antibodies. The following antibodies were used: anti-HA (Sigma), anti-Flag(Sigma), anti-Fc (Sigma), anti-GDI2 (Proteintech), anti-FLOT1 (Abways), anti-VPS16B (Abcam), anti-VPS33B (Santa Cruz Biotechnology) and anti- $\beta$ -actin (HuaAn Biotechnology).

### **Cryo-immunogold electron microscopy**

ANGPTL2-overexpressing 293T cells that were infected with either scrambled or VPS33B-targeted shRNA were fixed with 4.0% paraformaldehyde and 0.2% glutaraldehyde in 0.1 M phosphate buffer (pH 7.4) at room temperature for 1 h. The cell pellet was collected, mixed with warm 12% gelatin and cut into small pieces. Samples were then cryoprotected in 2.3 M sucrose in PBS at 4 °C for overnight. Ultrathin sections were cut on a LEICA EM FC7 at -80 °C. Immunogold staining was conducted by incubating the sections with a mouse-anti-Flag antibody (Prozyme PJ255) overnight at 4 °C, followed by incubation with anti-mouse 10 nm IgG gold (Sigma 041M1453). ANGPTL2 particles in 80-100 MVBs in total 20 of cells were quantified.

### **Retrovirus or lentivirus infection**

The retroviral plasmids, including MSCV-GDI2-IRES-GFP, MSCV-ANGPTL2-IRES-GFP, and MSCV-ANGPTL3-IRES-GFP, were transfected with pCL-ECO (2:1) into 293T cells by using calcium phosphate-based transfection. The resulting retroviral

supernatant was collected 48-72 h later and used to infect VPS33B-null HSCs, which were then injected into recipient mice as previously described (15). In some cases, the lentiviral vector pLL3.7 was used to express shRNAs designed to target either mouse GDI2 or human VPS33B (sequences listed in Table S1). Lentiviral constructs were mixed with the pSPAX2 and pMD2G packaging plasmids (4:3:1, respectively) and transfected into 293T cells. Supernatant containing lentiviruses was harvested 48 h and 72 h later. After the supernatant was filtered through a 0.45- $\mu$ m low protein binding-polysulfonic filter (Millipore), lentiviruses were used to infect a myeloid cell line (32D), AML cell lines (HL-60, THP-1, and U937) or human primary CD34<sup>+</sup> AML cells. LICs (70,000) treated with either shRNAs targeting VPS33B or a scrambled shRNA were also seeded in methylcellulose for colony forming analysis. Cell proliferation and apoptosis were evaluated at the indicated time points.

### **Homing**

Homing assays were performed as previously described (15, 38). Briefly, a total of  $1 \times 10^7$  BM cells from 8-10-week-old VPS33B<sup>+/+</sup> and VPS33B<sup>-/-</sup> mice were labeled with 5-(and -6) carboxyfluorescein succinimidylester (CFSE) and injected into lethally irradiated mice. Total CFSE<sup>+</sup> cells were measured in the bone marrow, spleen, and liver 16 h after transplantation by flow cytometry. When CFSE<sup>+</sup>Lin<sup>-</sup>Sca1<sup>+</sup>c-Kit<sup>+</sup> cells were analyzed, BM cells were treated with a biotinylated lineage cocktail followed by staining with streptavidin-PE/Cy5.5, anti-Sca-1-PE, and anti-c-Kit-APC before analysis.

### **Colony forming unit assays**

The indicated numbers of BM cells from VPS33B<sup>+/+</sup> and VPS33B<sup>-/-</sup> mice were plated into MethoCult M3434 (StemCell Technologies) for CFU-GM and BFU-E colony formation analyses, MethoCult M3334 for CFU-E colony formation analysis, or MethoCult M3630 (StemCell Technologies) for CFU-Pre-B colony formation analysis according to the manufacturer's protocols. VPS33B-knockdown CD34<sup>+</sup> HSCs from human cord blood or AML samples were seeded into MethoCult H4436 (Stem Cell Technologies) for colony formation analysis. The numbers of colonies were calculated after 7-10 days of culturing.

### **Quantitative RT-PCR**

Cells were sorted by flow cytometry to isolate total RNA. First strand cDNA was reverse transcribed using AMV reverse transcriptase (TaKaRa). PCR reactions were performed according to the manufacturer's protocol. In brief, 10  $\mu$ L reactions with FastStart Universal SYBR Green Master (ROX), primers, and cDNA were used for the analysis of expression levels. The experiments were conducted in triplicate with the Applied Biosystems 7900HT. The mRNA levels were normalized to the level of  $\beta$ -actin RNA transcripts. The primer sequences used are shown in Table S1.

### **5-Fluorouracil challenge**

5-Fluorouracil (5-FU) was intraperitoneally administered to VPS33B<sup>+/+</sup> and VPS33B<sup>-/-</sup> mice at a dose of 150 mg/kg weekly for 3 weeks. The survival rates of the two groups were compared using a log-rank test as described (15).

### **ANGPTL2-LILRB2 binding assay**

CMV-driven LILRB2-transfected 293T cells were collected and incubated with control conditioned medium (Ctrl-CM), Flag-tagged ANGPTL2-conditioned medium (ANGPTL2-CM) or their respective purified exosomes (Ctrl-Exo or ANGPTL2-Exo) at 4  $^{\circ}$ C for 90 min followed by staining with anti-Flag-APC and anti-LILRB2-PE and to conduct flow cytometry analysis on binding activity using a FACS BD LSRFortessa instrument. As shown in the FACS plot, the Y-axis represents the ANGPTL2-LILRB2 binding activity detected by anti-Flag-APC antibodies, and the X-axis represents the LILRB2 expression recognized by anti-LILRB2-PE antibodies. The values in each box indicated the mean fluorescence intensity of binding activities.

### **TUNEL assay**

FACS-sorted WT and VPS33B-null BM Lin<sup>-</sup>Sca-1<sup>+</sup>c-Kit<sup>+</sup>Flk2<sup>-</sup>CD34<sup>-</sup> LT-HSCs were collected by cytopsin and fixed for TUNEL staining using an *In Situ* Cell Death Detection Kit, Fluorescein (Roche).

### **Endocytosis analysis**

The delivery of endocytosed dextran to lysosomes in VPS33B-targeted shRNA-infected 293T cells was performed as previously described (39). The degree of colocalization of Alexa Fluor 488-labeled dextran with Magic Red® was measured by either Manders  $c1/c2$  colocalization coefficients using Nikon A1 software or flow cytometric analysis. For the statistics, three independent experiments with 30 fields each, 30-50 of cells per field, were counted.

**Figure S1**

**A**

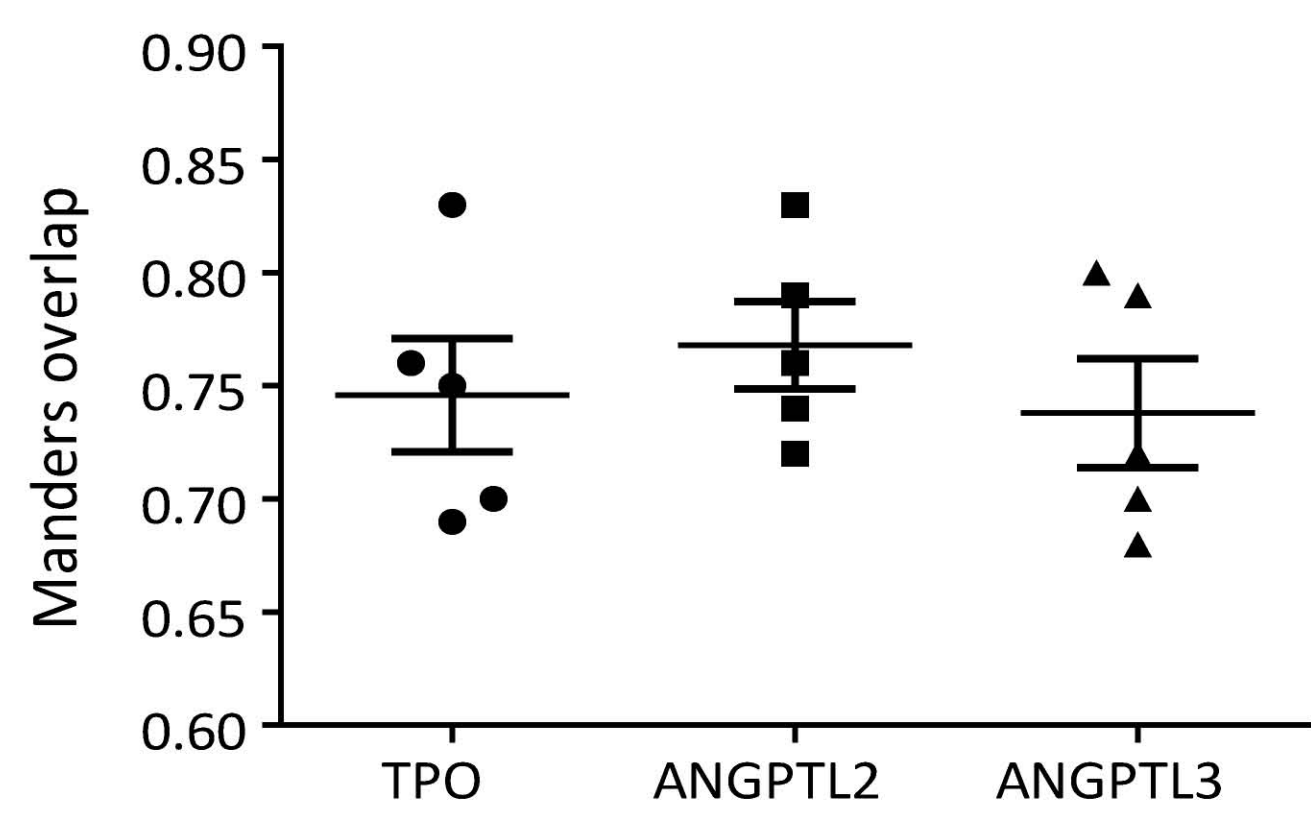

**E**

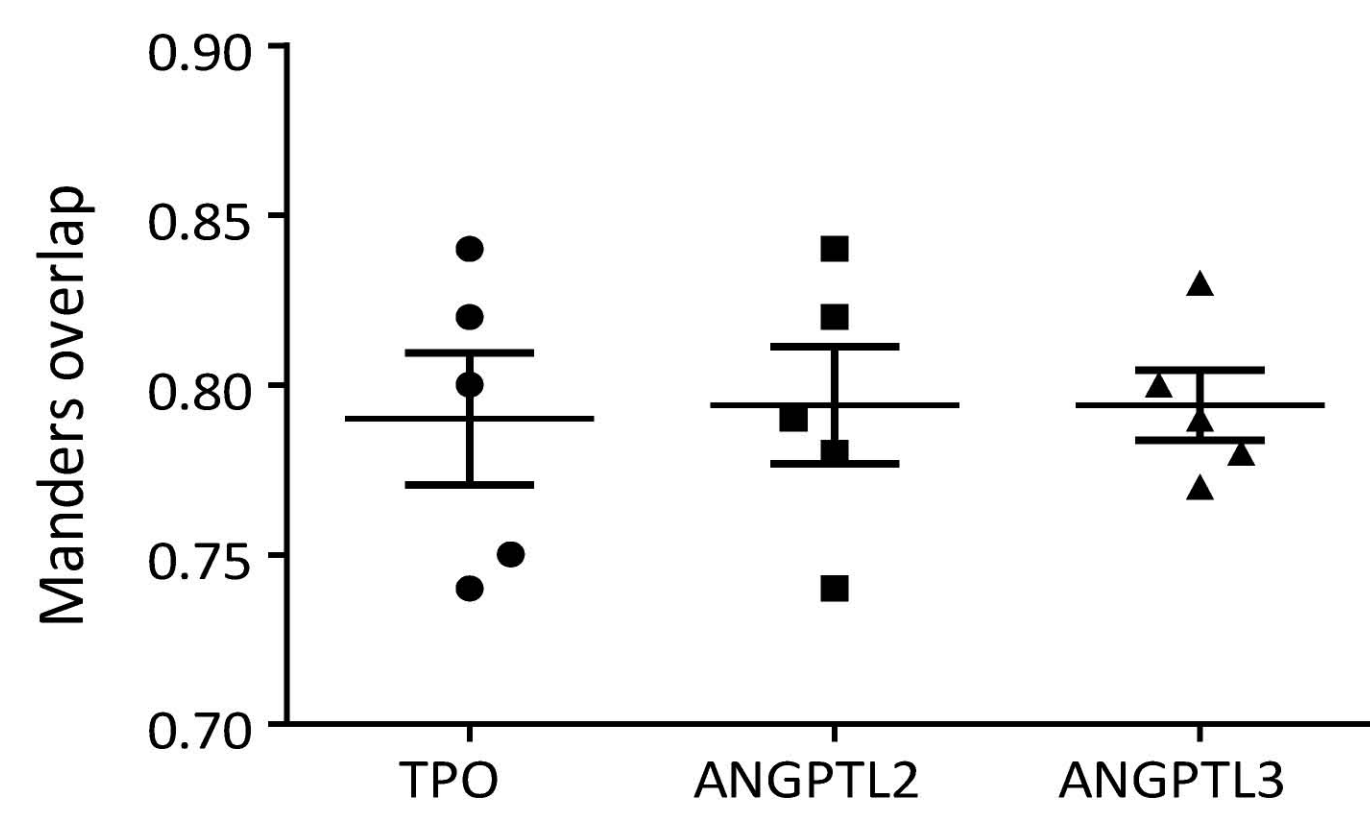

**G**

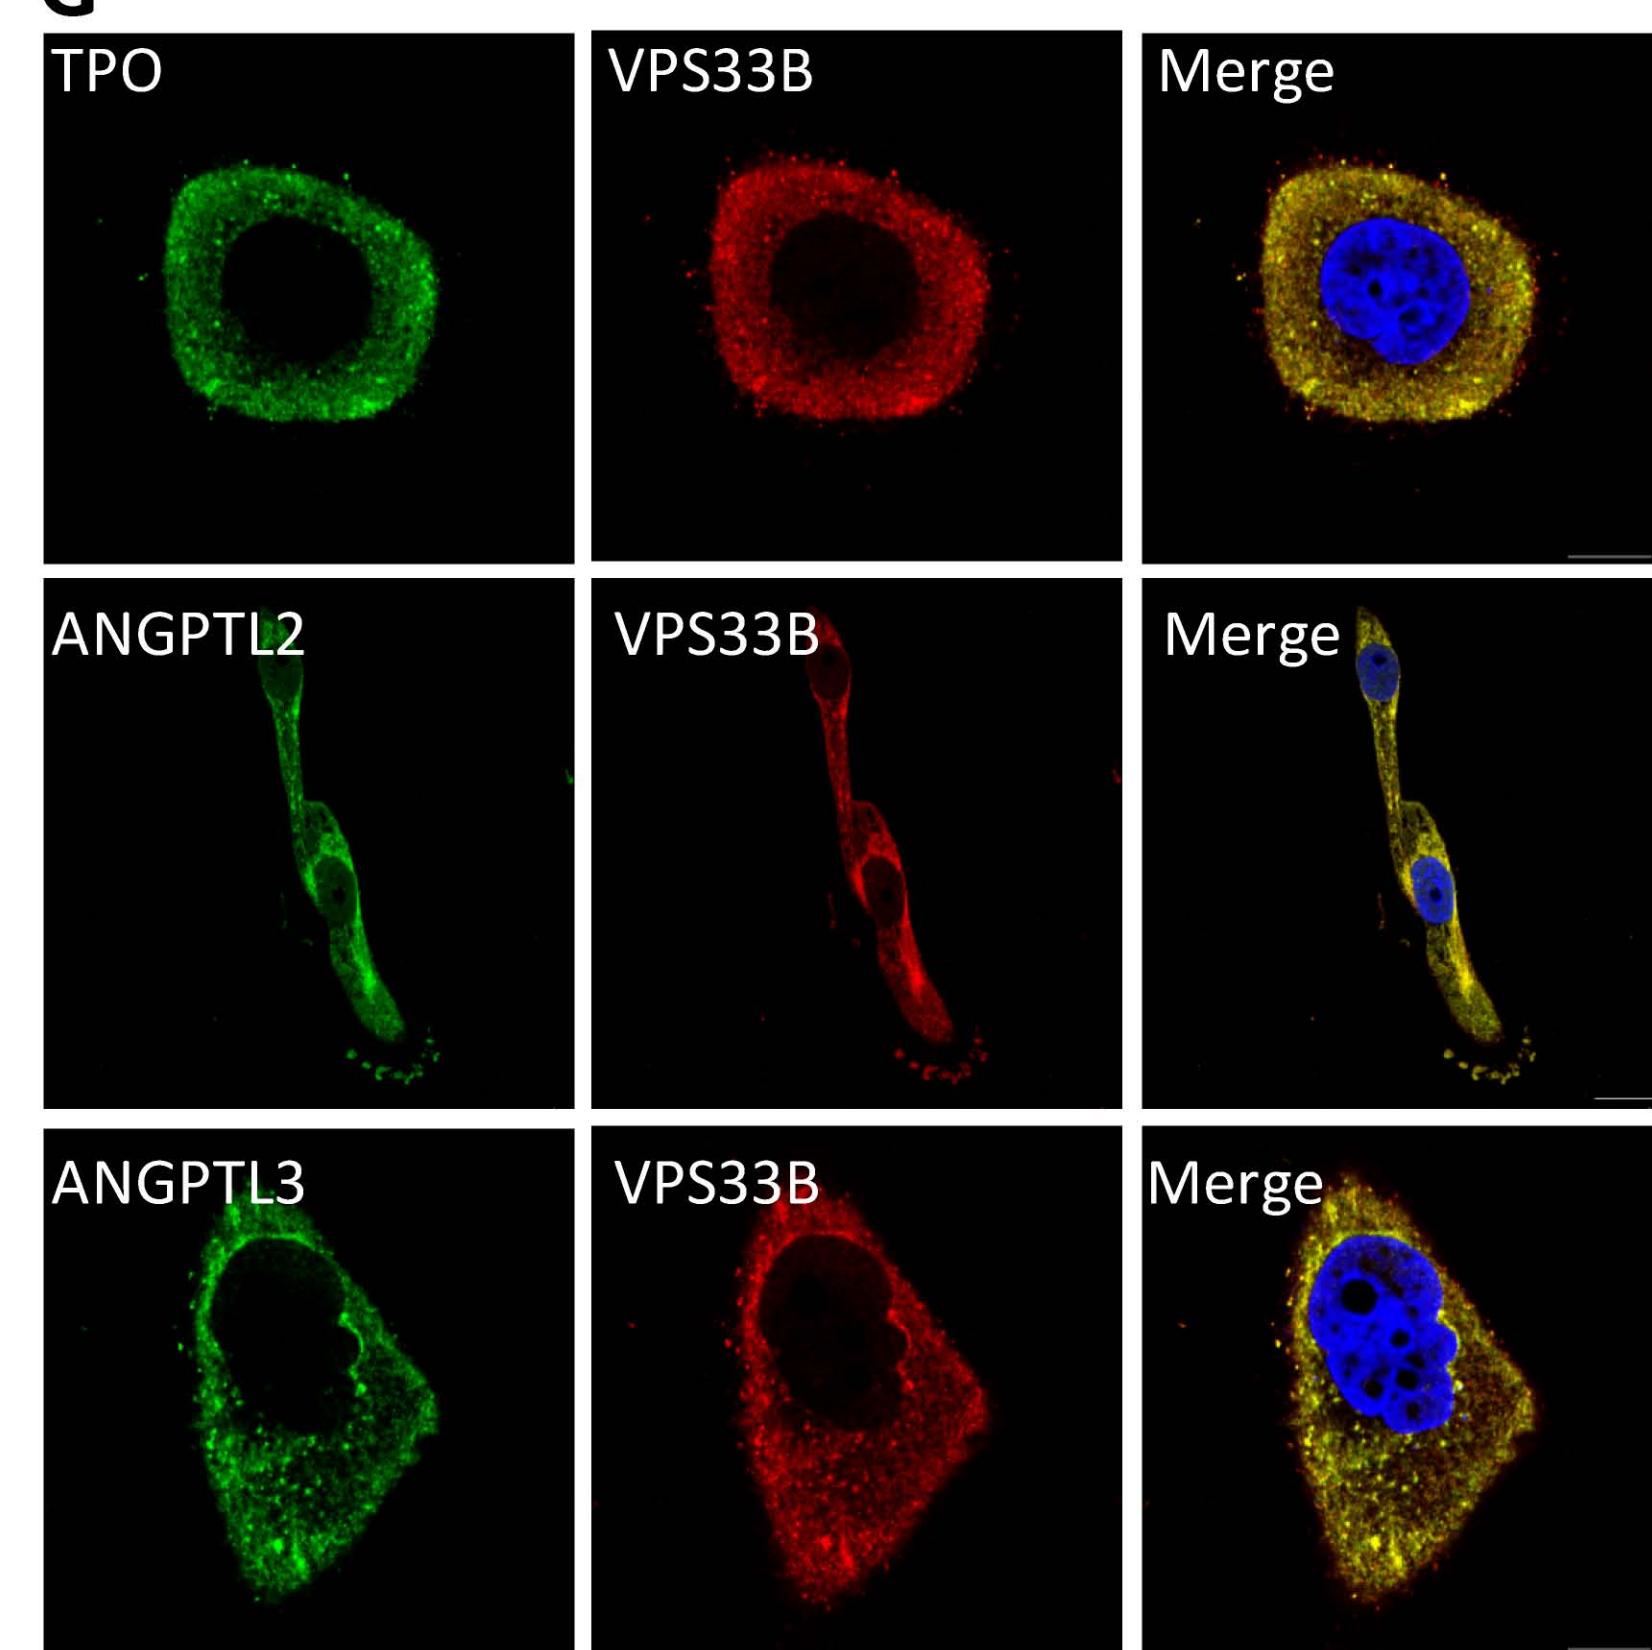

**B**

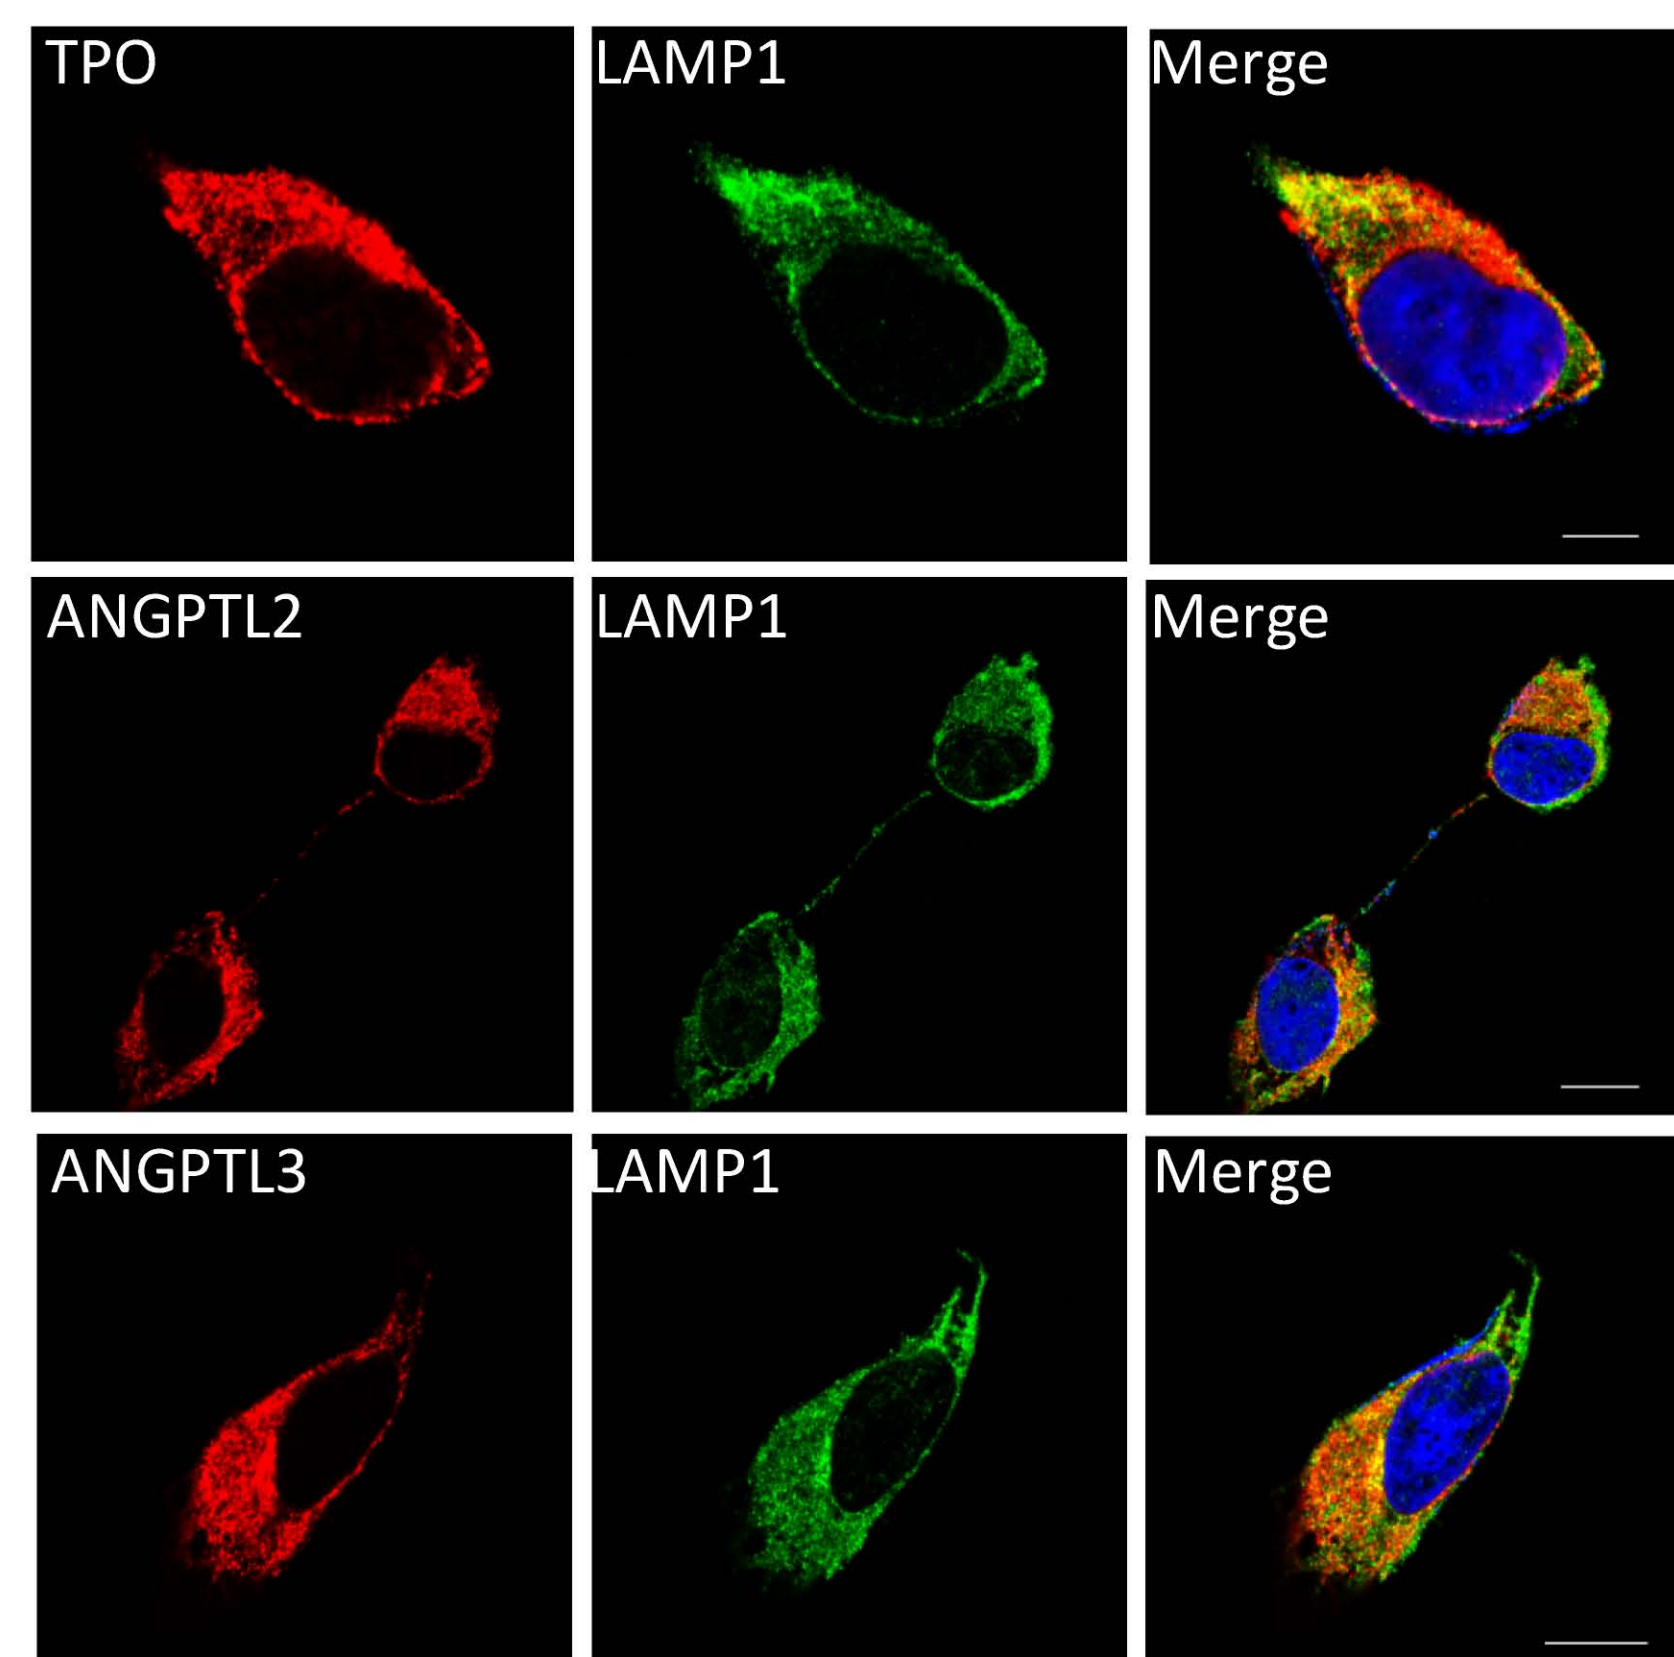

**F**

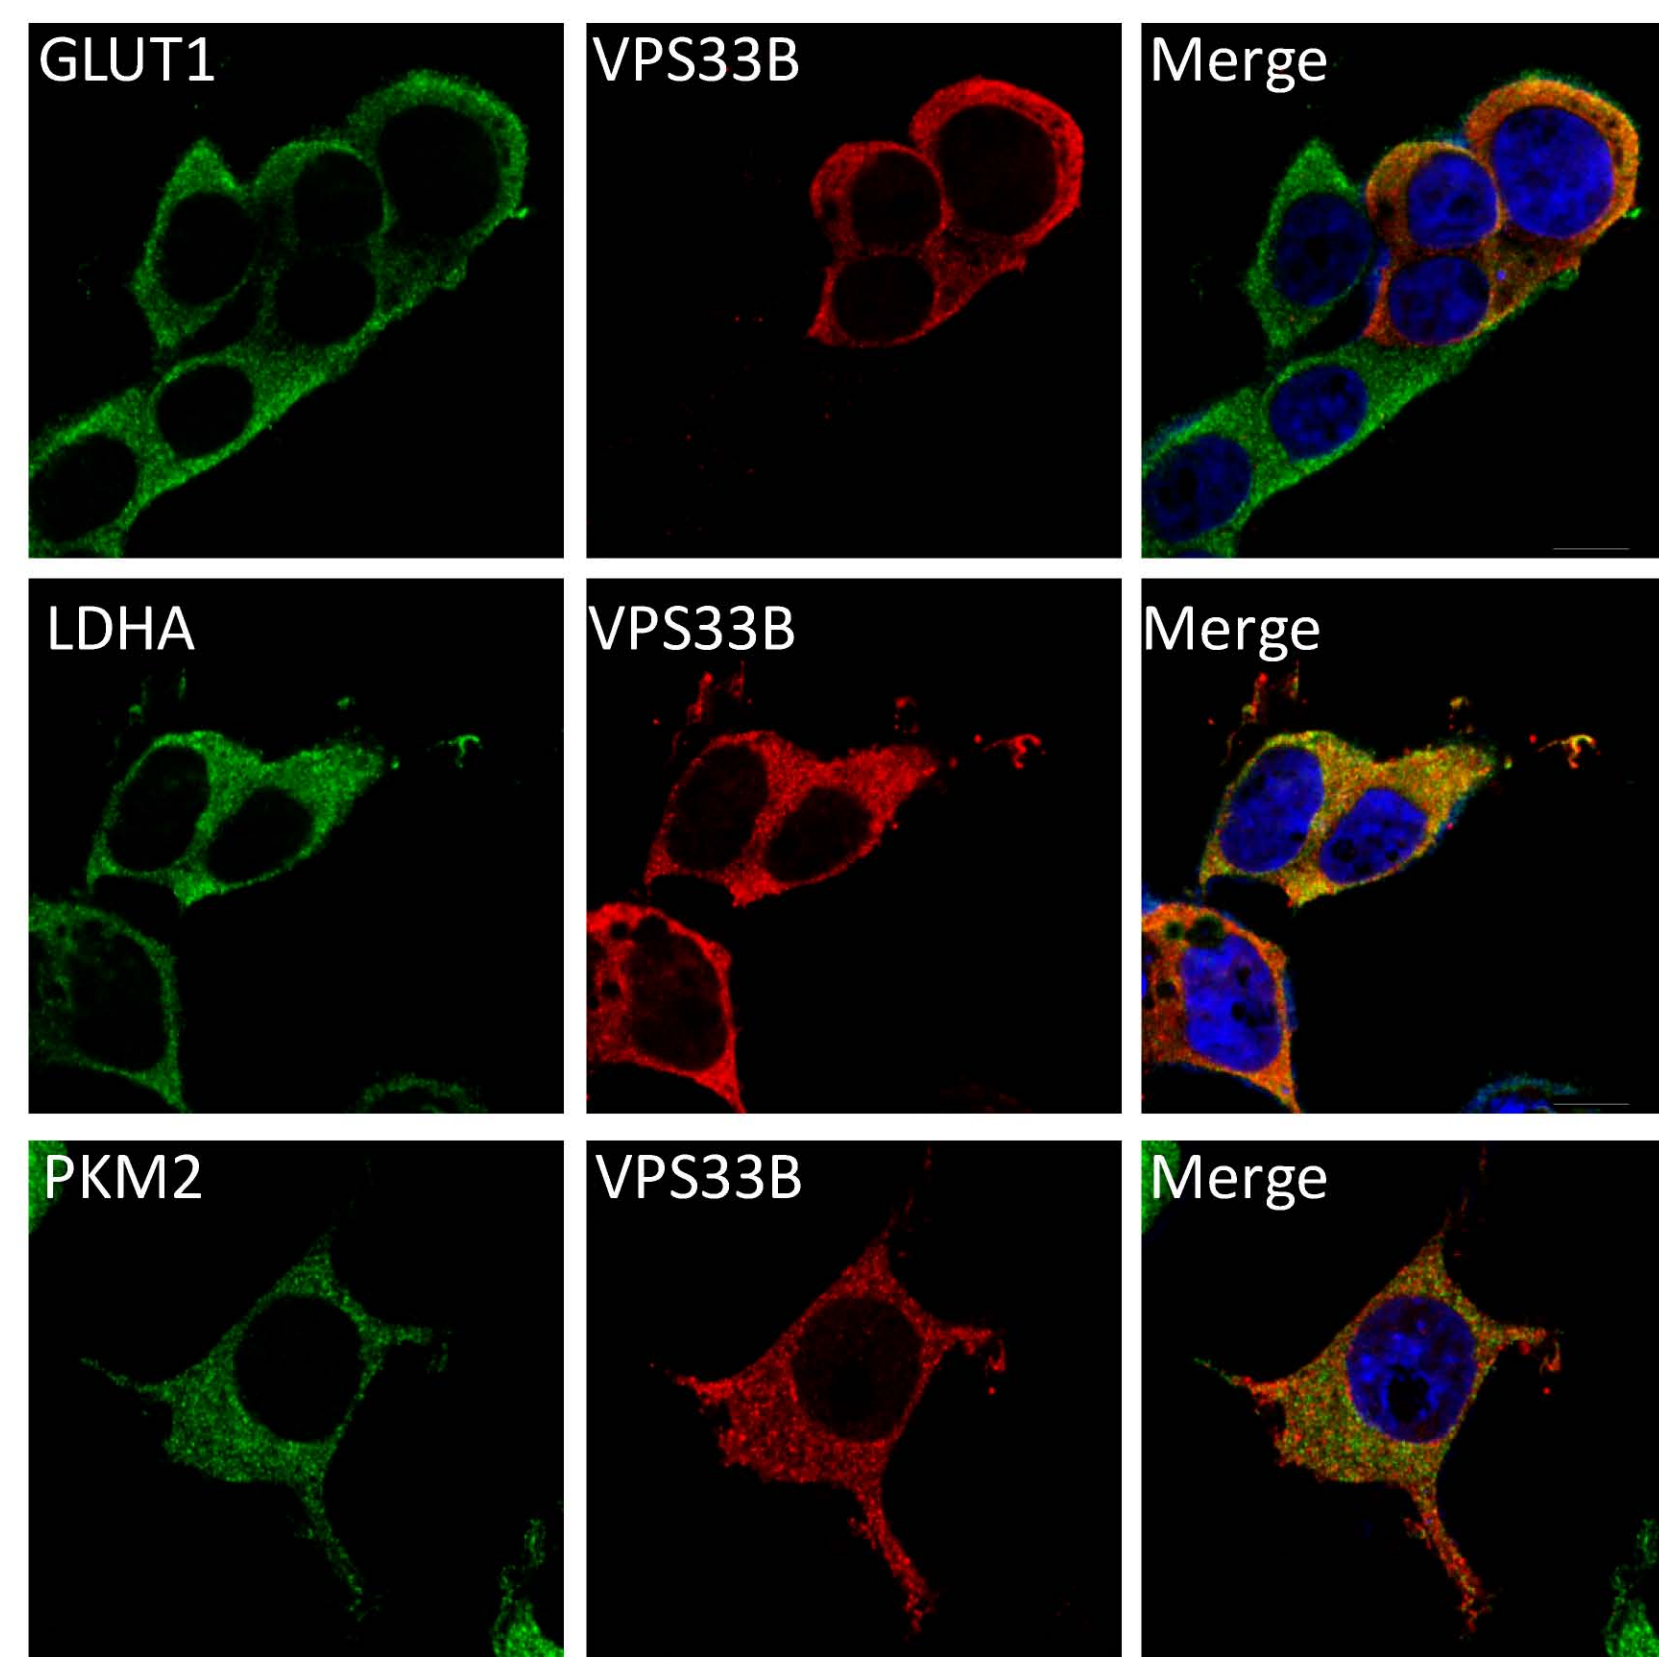

**H**

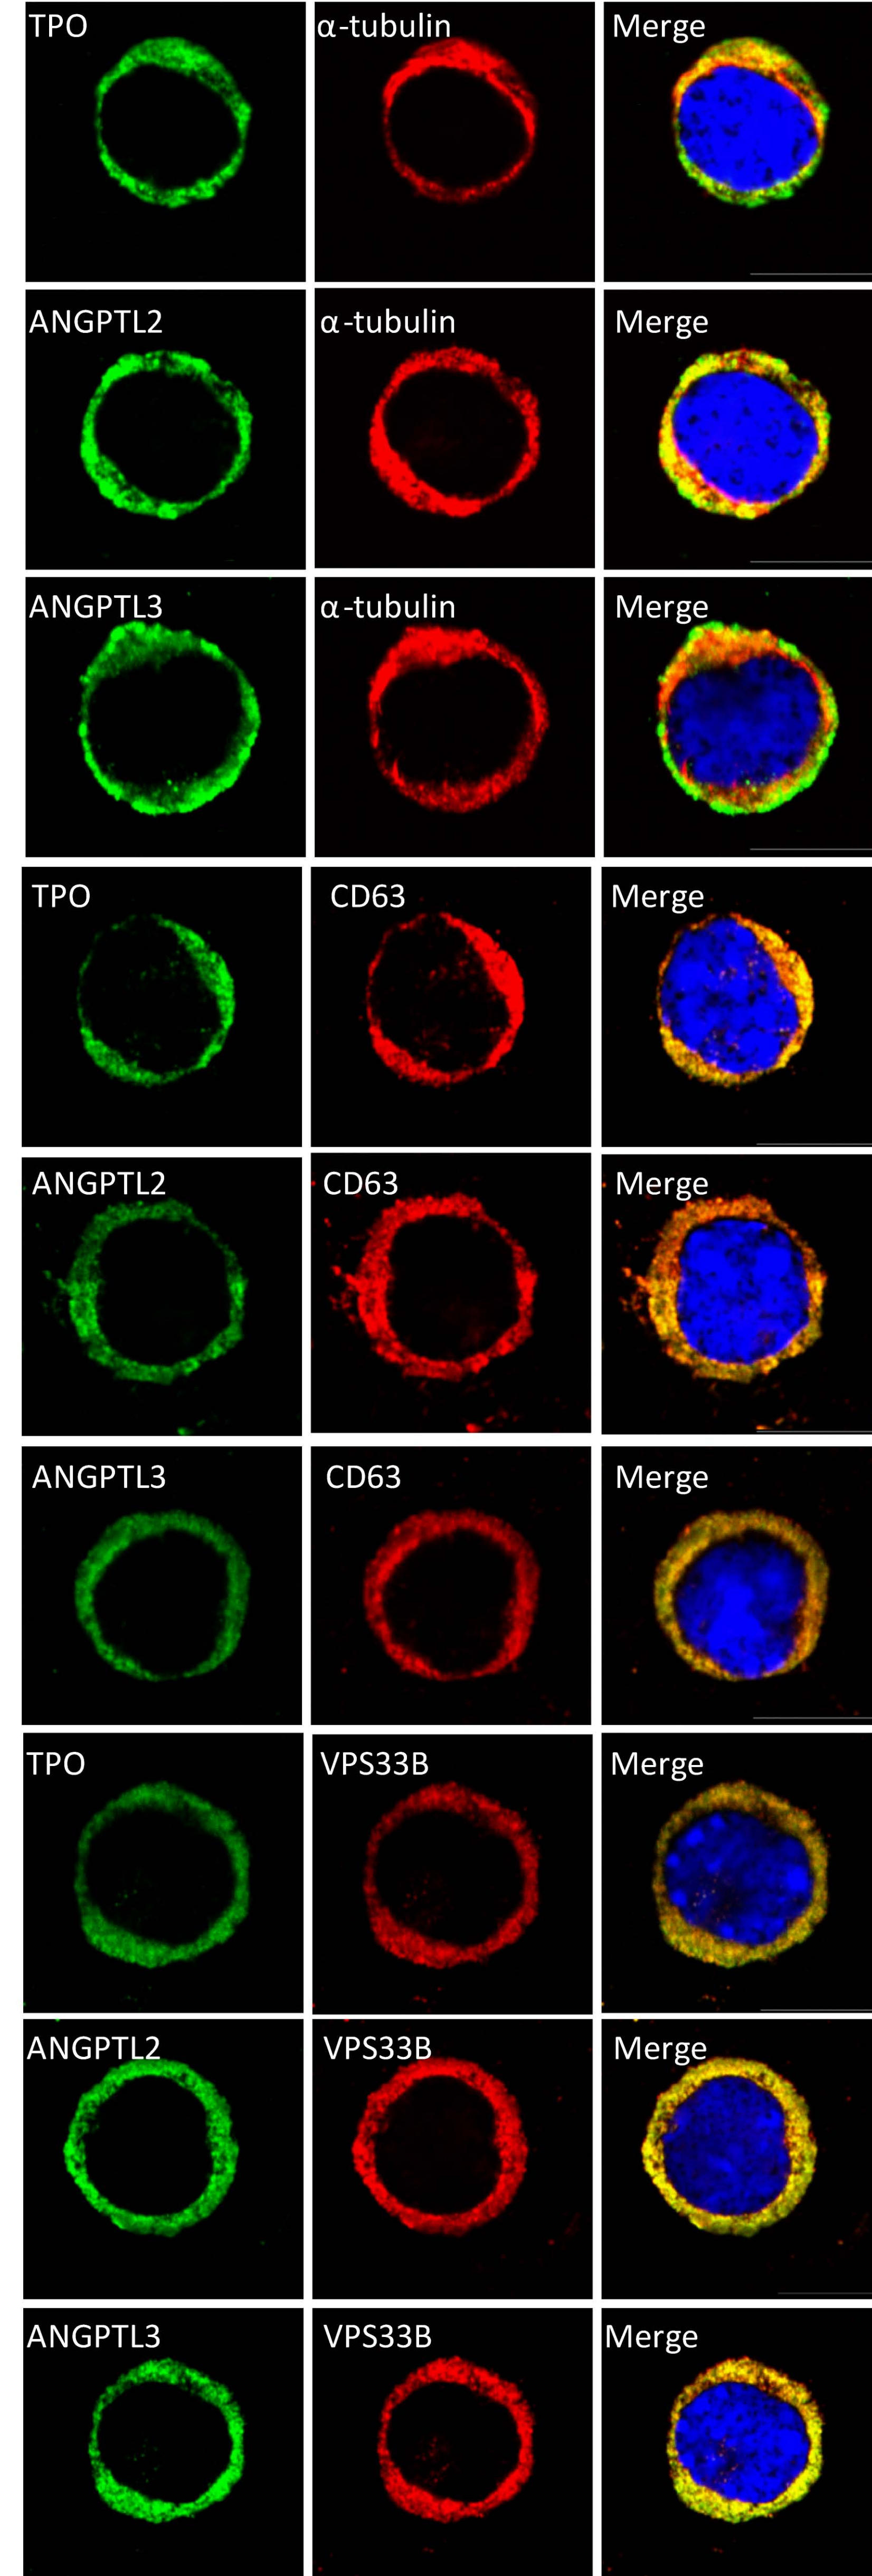

**C**

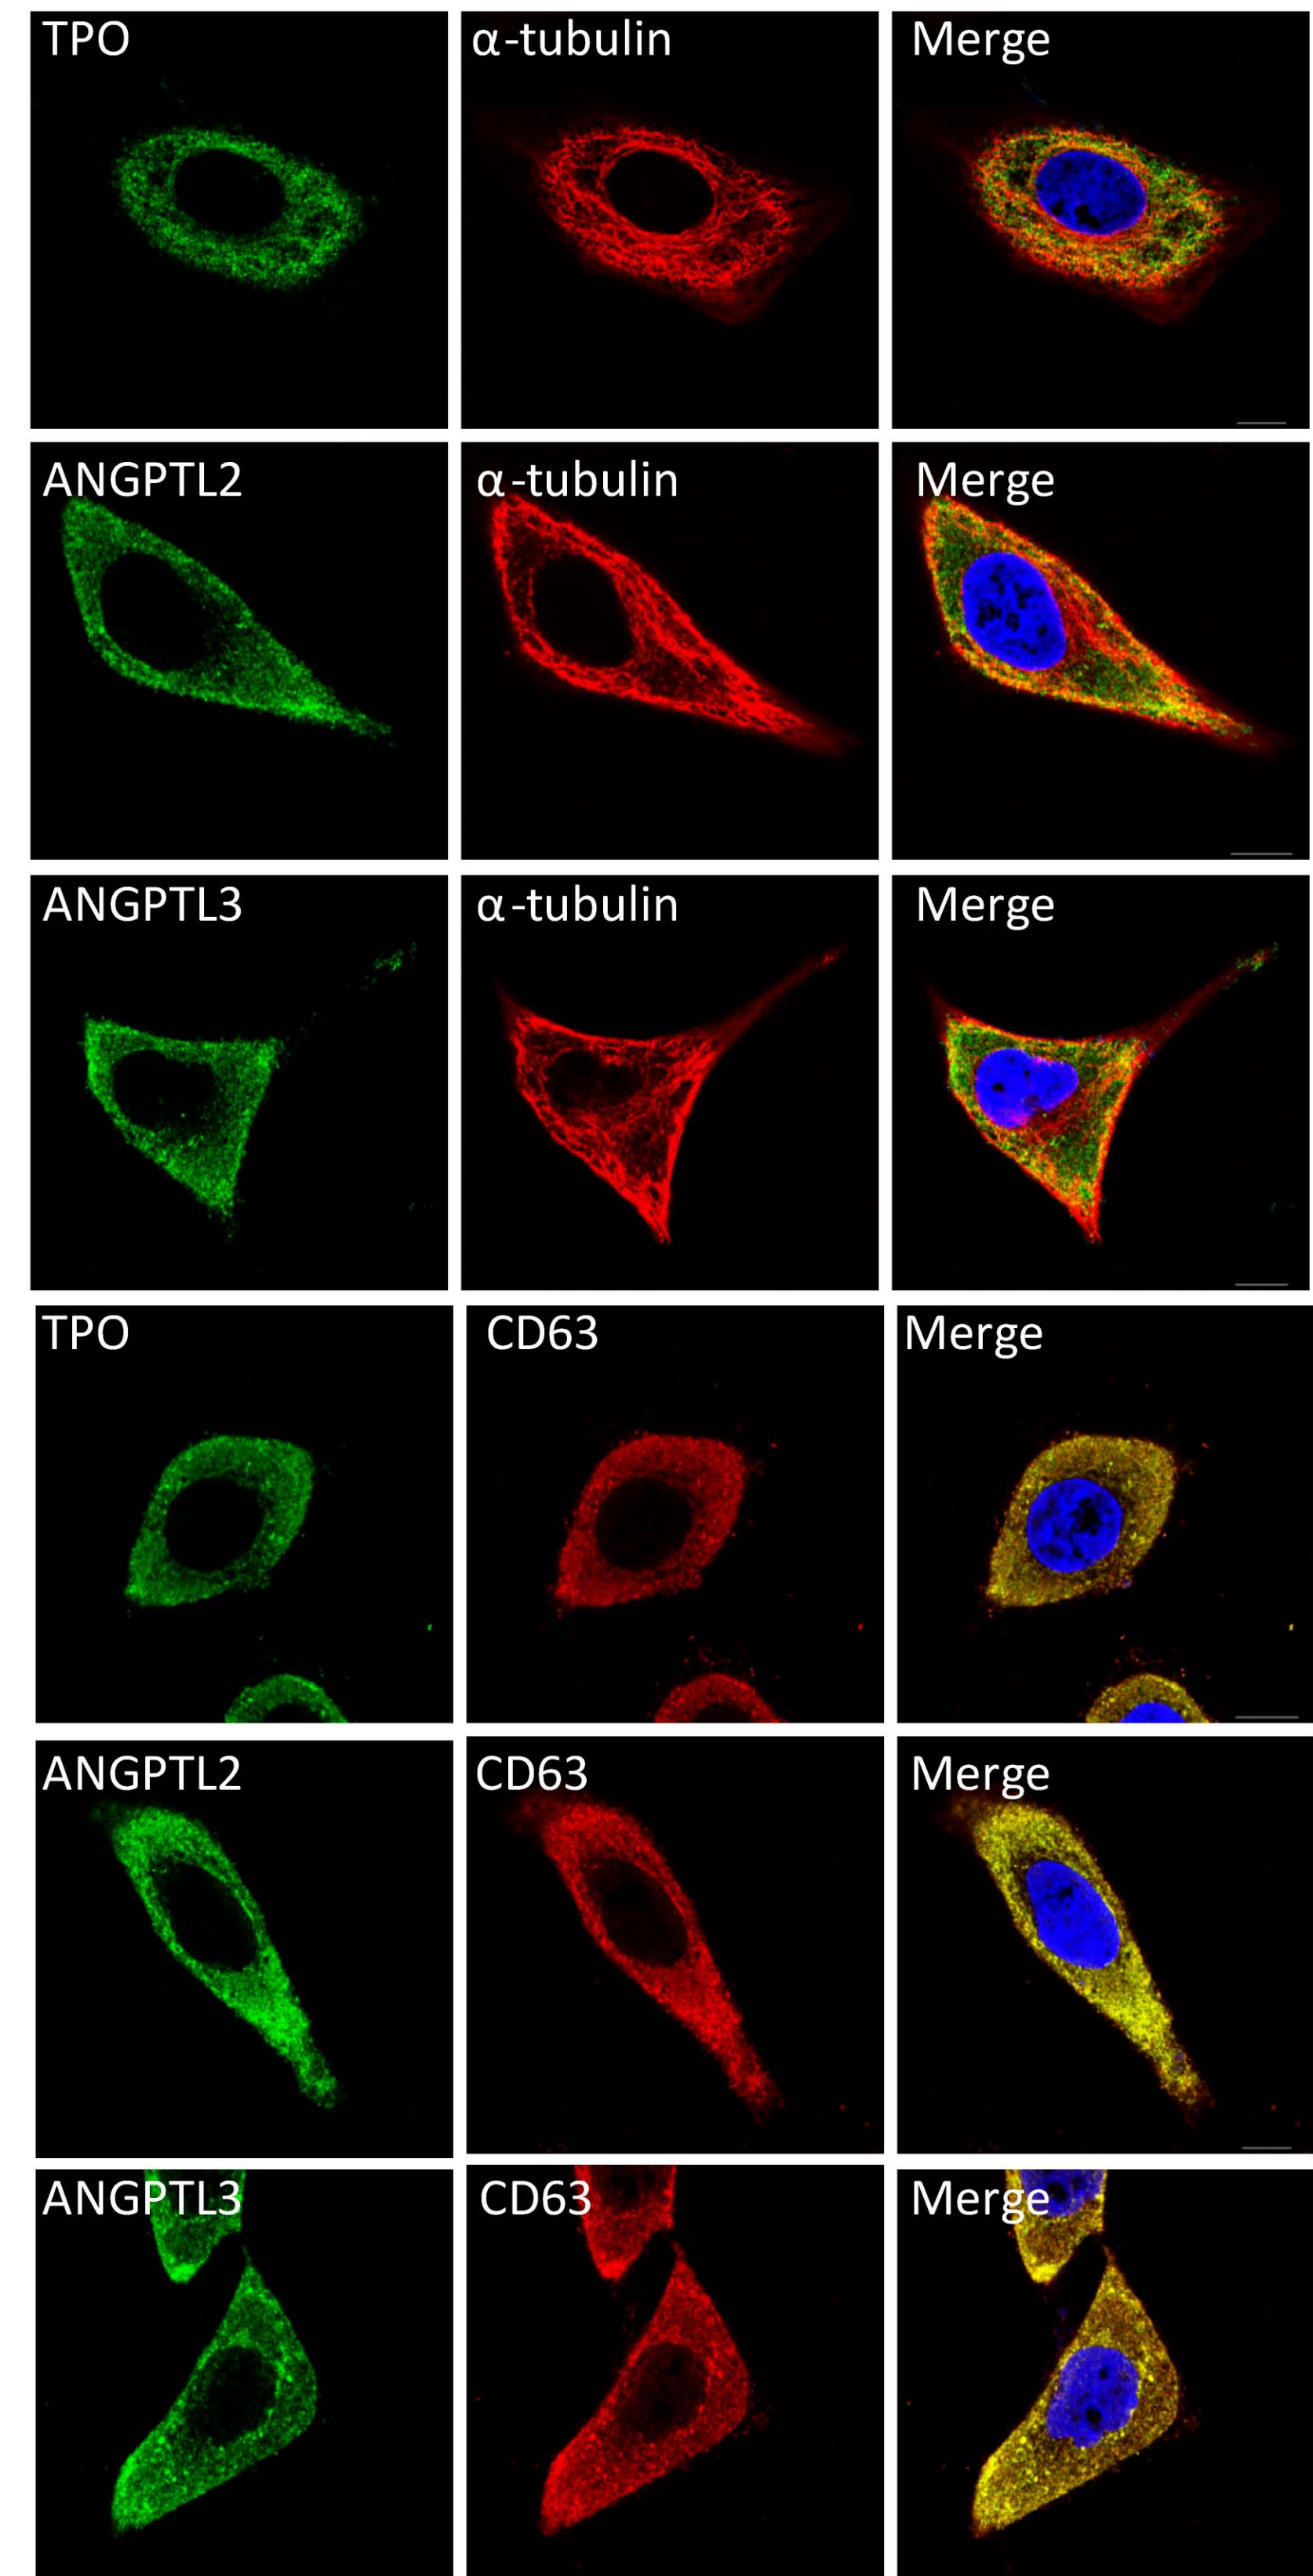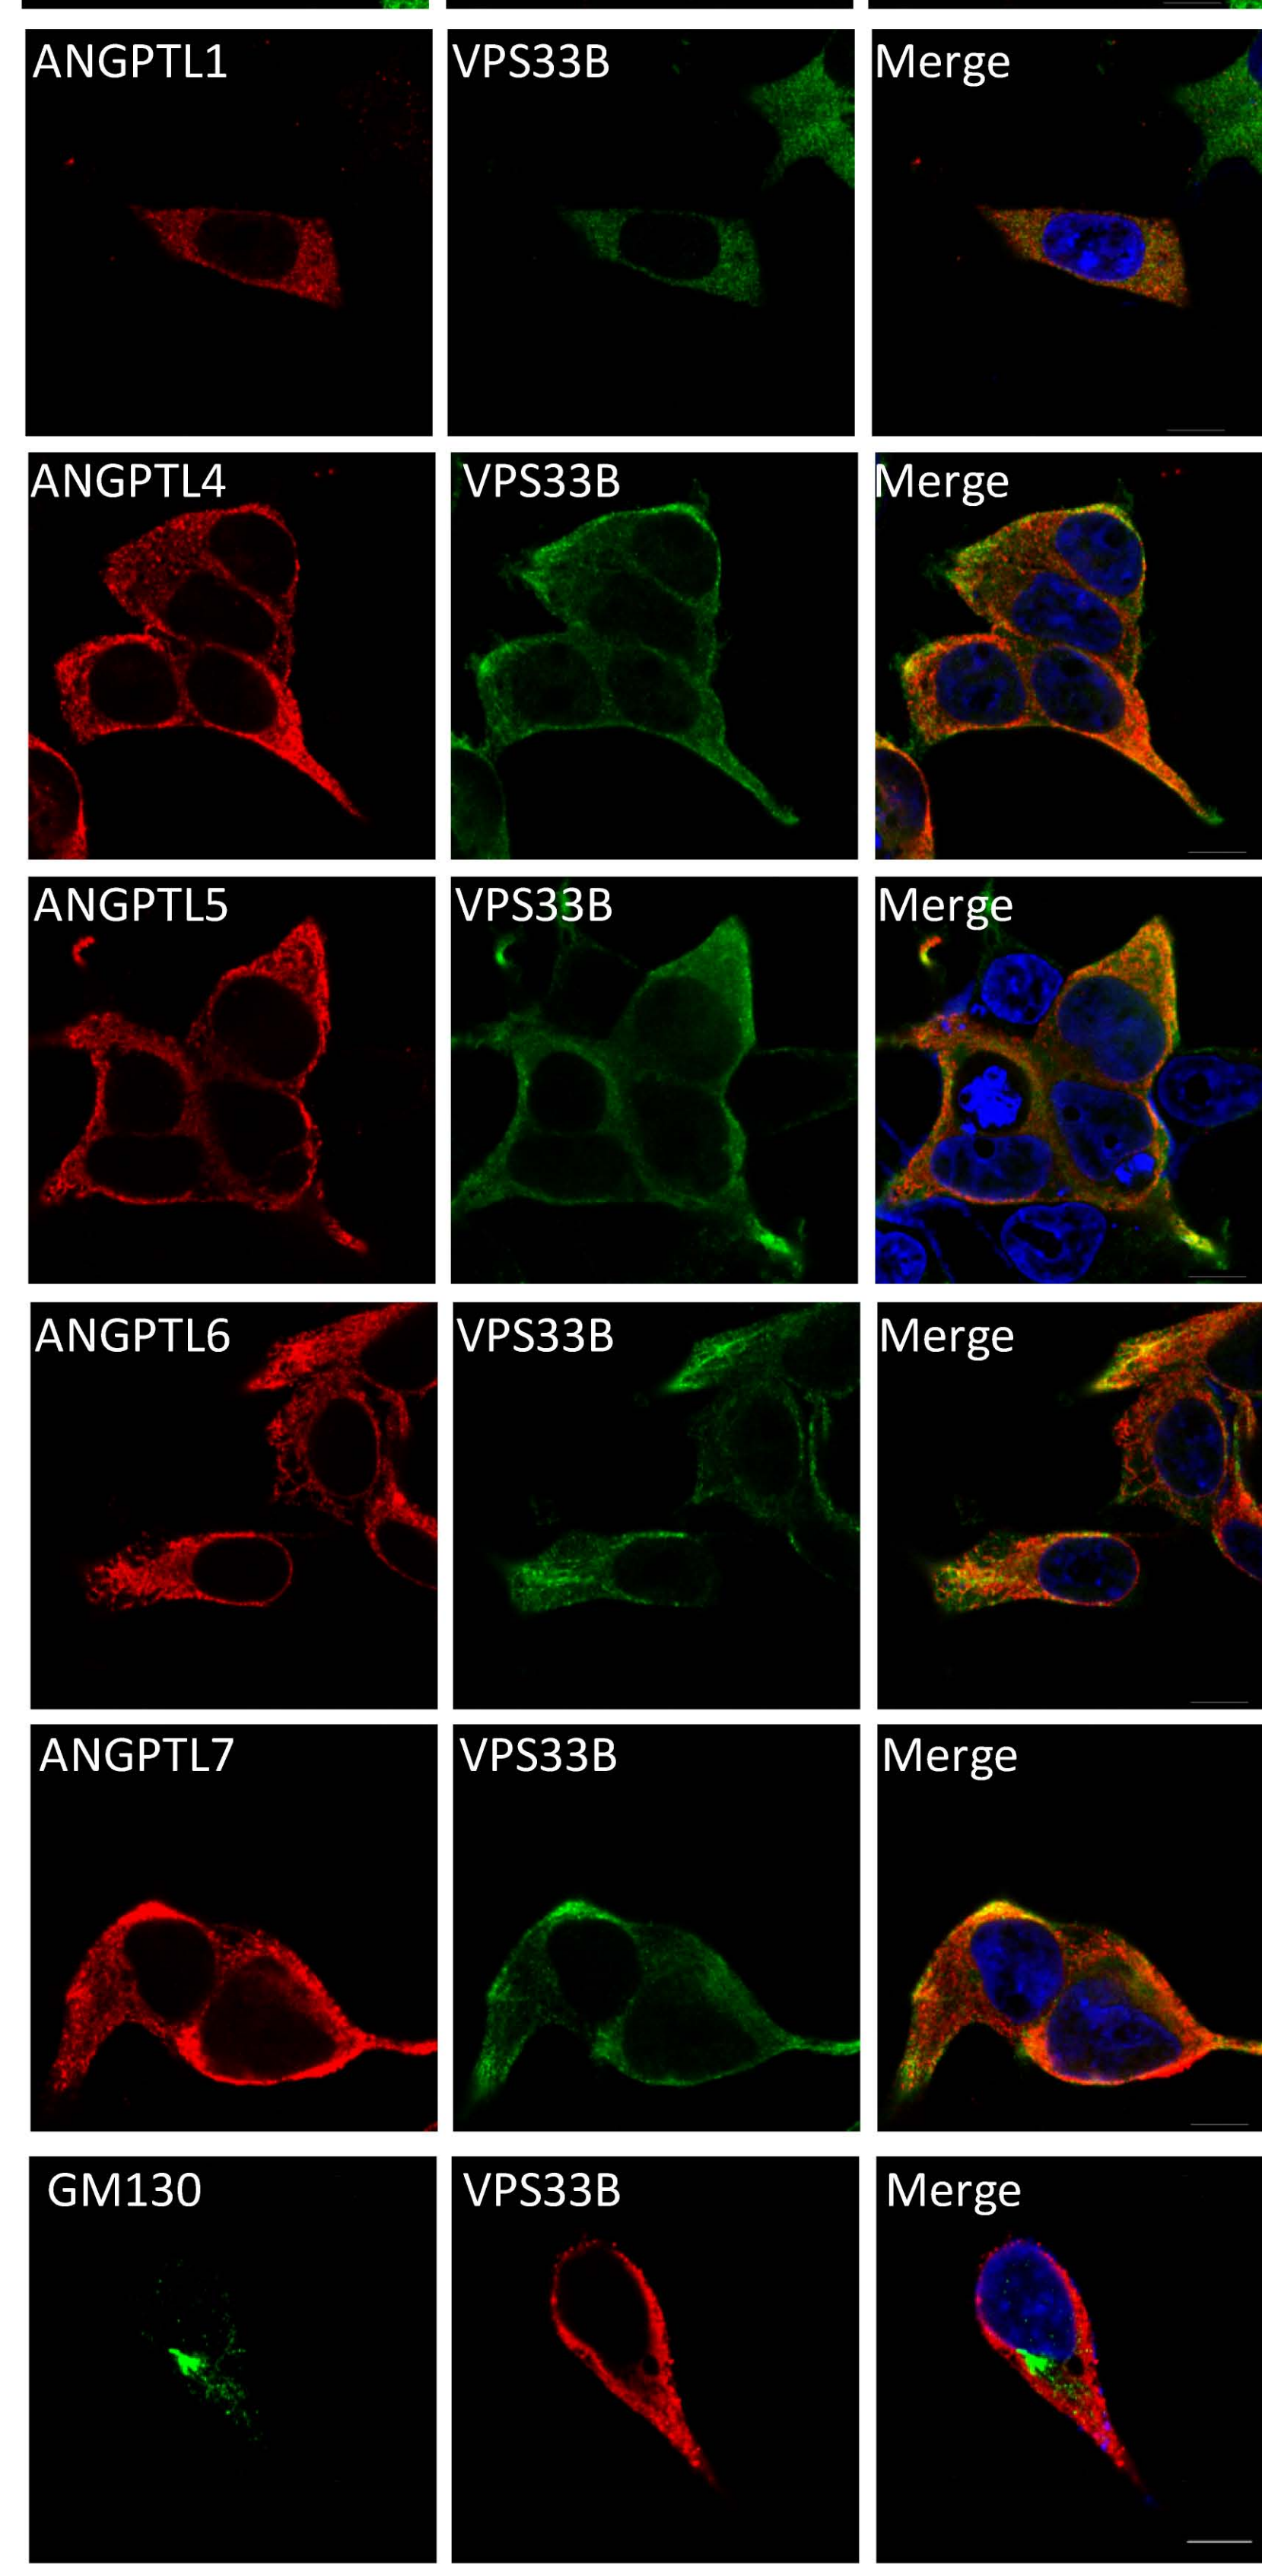

**D**

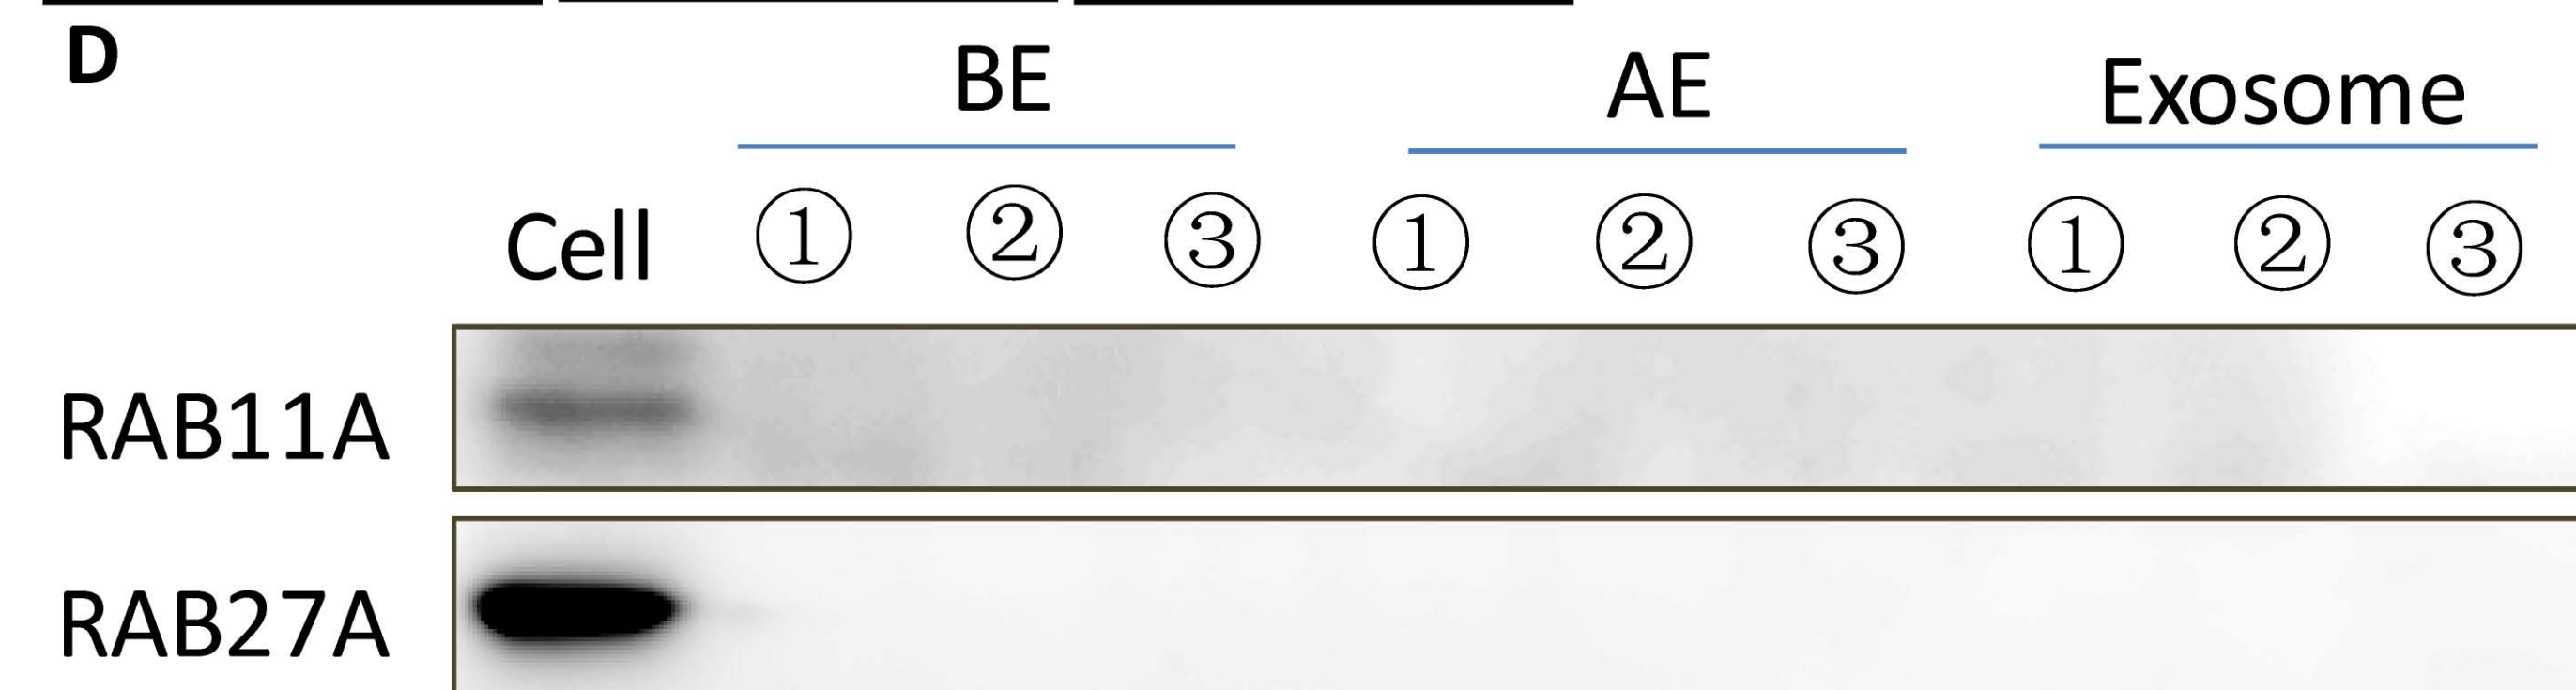

**Figure S1. VPS33B colocalizes with a number of proteins that may be critical for HSC stemness.** A) Five independent experiments with 30 fields each, 30-50 of cells per field, were quantified for the voxel overlap of  $\alpha$ -tubulin with TPO, ANGPTL2 and ANGPTL3. B) 293T cells transfected with TPO, ANGPTL2, and ANGPTL3 (red) were costained with LAMP1 (green) to evaluate colocalization as shown on the right of each row. C) Endogenous TPO, ANGPTL2 and ANGPTL3 (green) in HepG2, MDA-MB-231 and SMMC-7721 cancer cell lines were costained with  $\alpha$ -tubulin and CD63 (red) to evaluate colocalization as shown on the right of each row. D) Exosomes were purified from human plasma and assayed to detect RAB11A and RAB27A. BE, before extraction; AE, after extraction. E) Five independent experiments with 30 fields each, 30-50 of cells per field, were quantified for the voxel overlap of VPS33B with TPO, ANGPTL2 and ANGPTL3. F) 293T cells transfected with either GLUT1, LDHA, and PKM2 (green) or ANGPTL1, 4, 5, 6, and 7 (red) were costained with VPS33B (red or green) to evaluate colocalization as shown on right of each row. GM130 (green), a marker for the cis-Golgi, served as a negative control for the colocalization staining with VPS33B (red). G) Endogenous TPO, ANGPTL2 and ANGPTL3 (green) in HepG2, MDA-MB-231 and SMMC-7721 cancer cell lines were costained with VPS33B (red) to evaluate colocalization as shown on the right of each row. H) Endogenous TPO, ANGPTL2 and ANGPTL3 (green) in LT-HSCs were costained with  $\alpha$ -tubulin, CD63 and VPS33B (red) to evaluate colocalization as shown on the right of each row (n=30, five independent experiments). In all the images for immunostaining, nuclei were counterstained with DAPI. Scale bar for immunostaining, 10 $\mu$ m. Experiments were conducted 3-5 times for validation.

**Figure S2**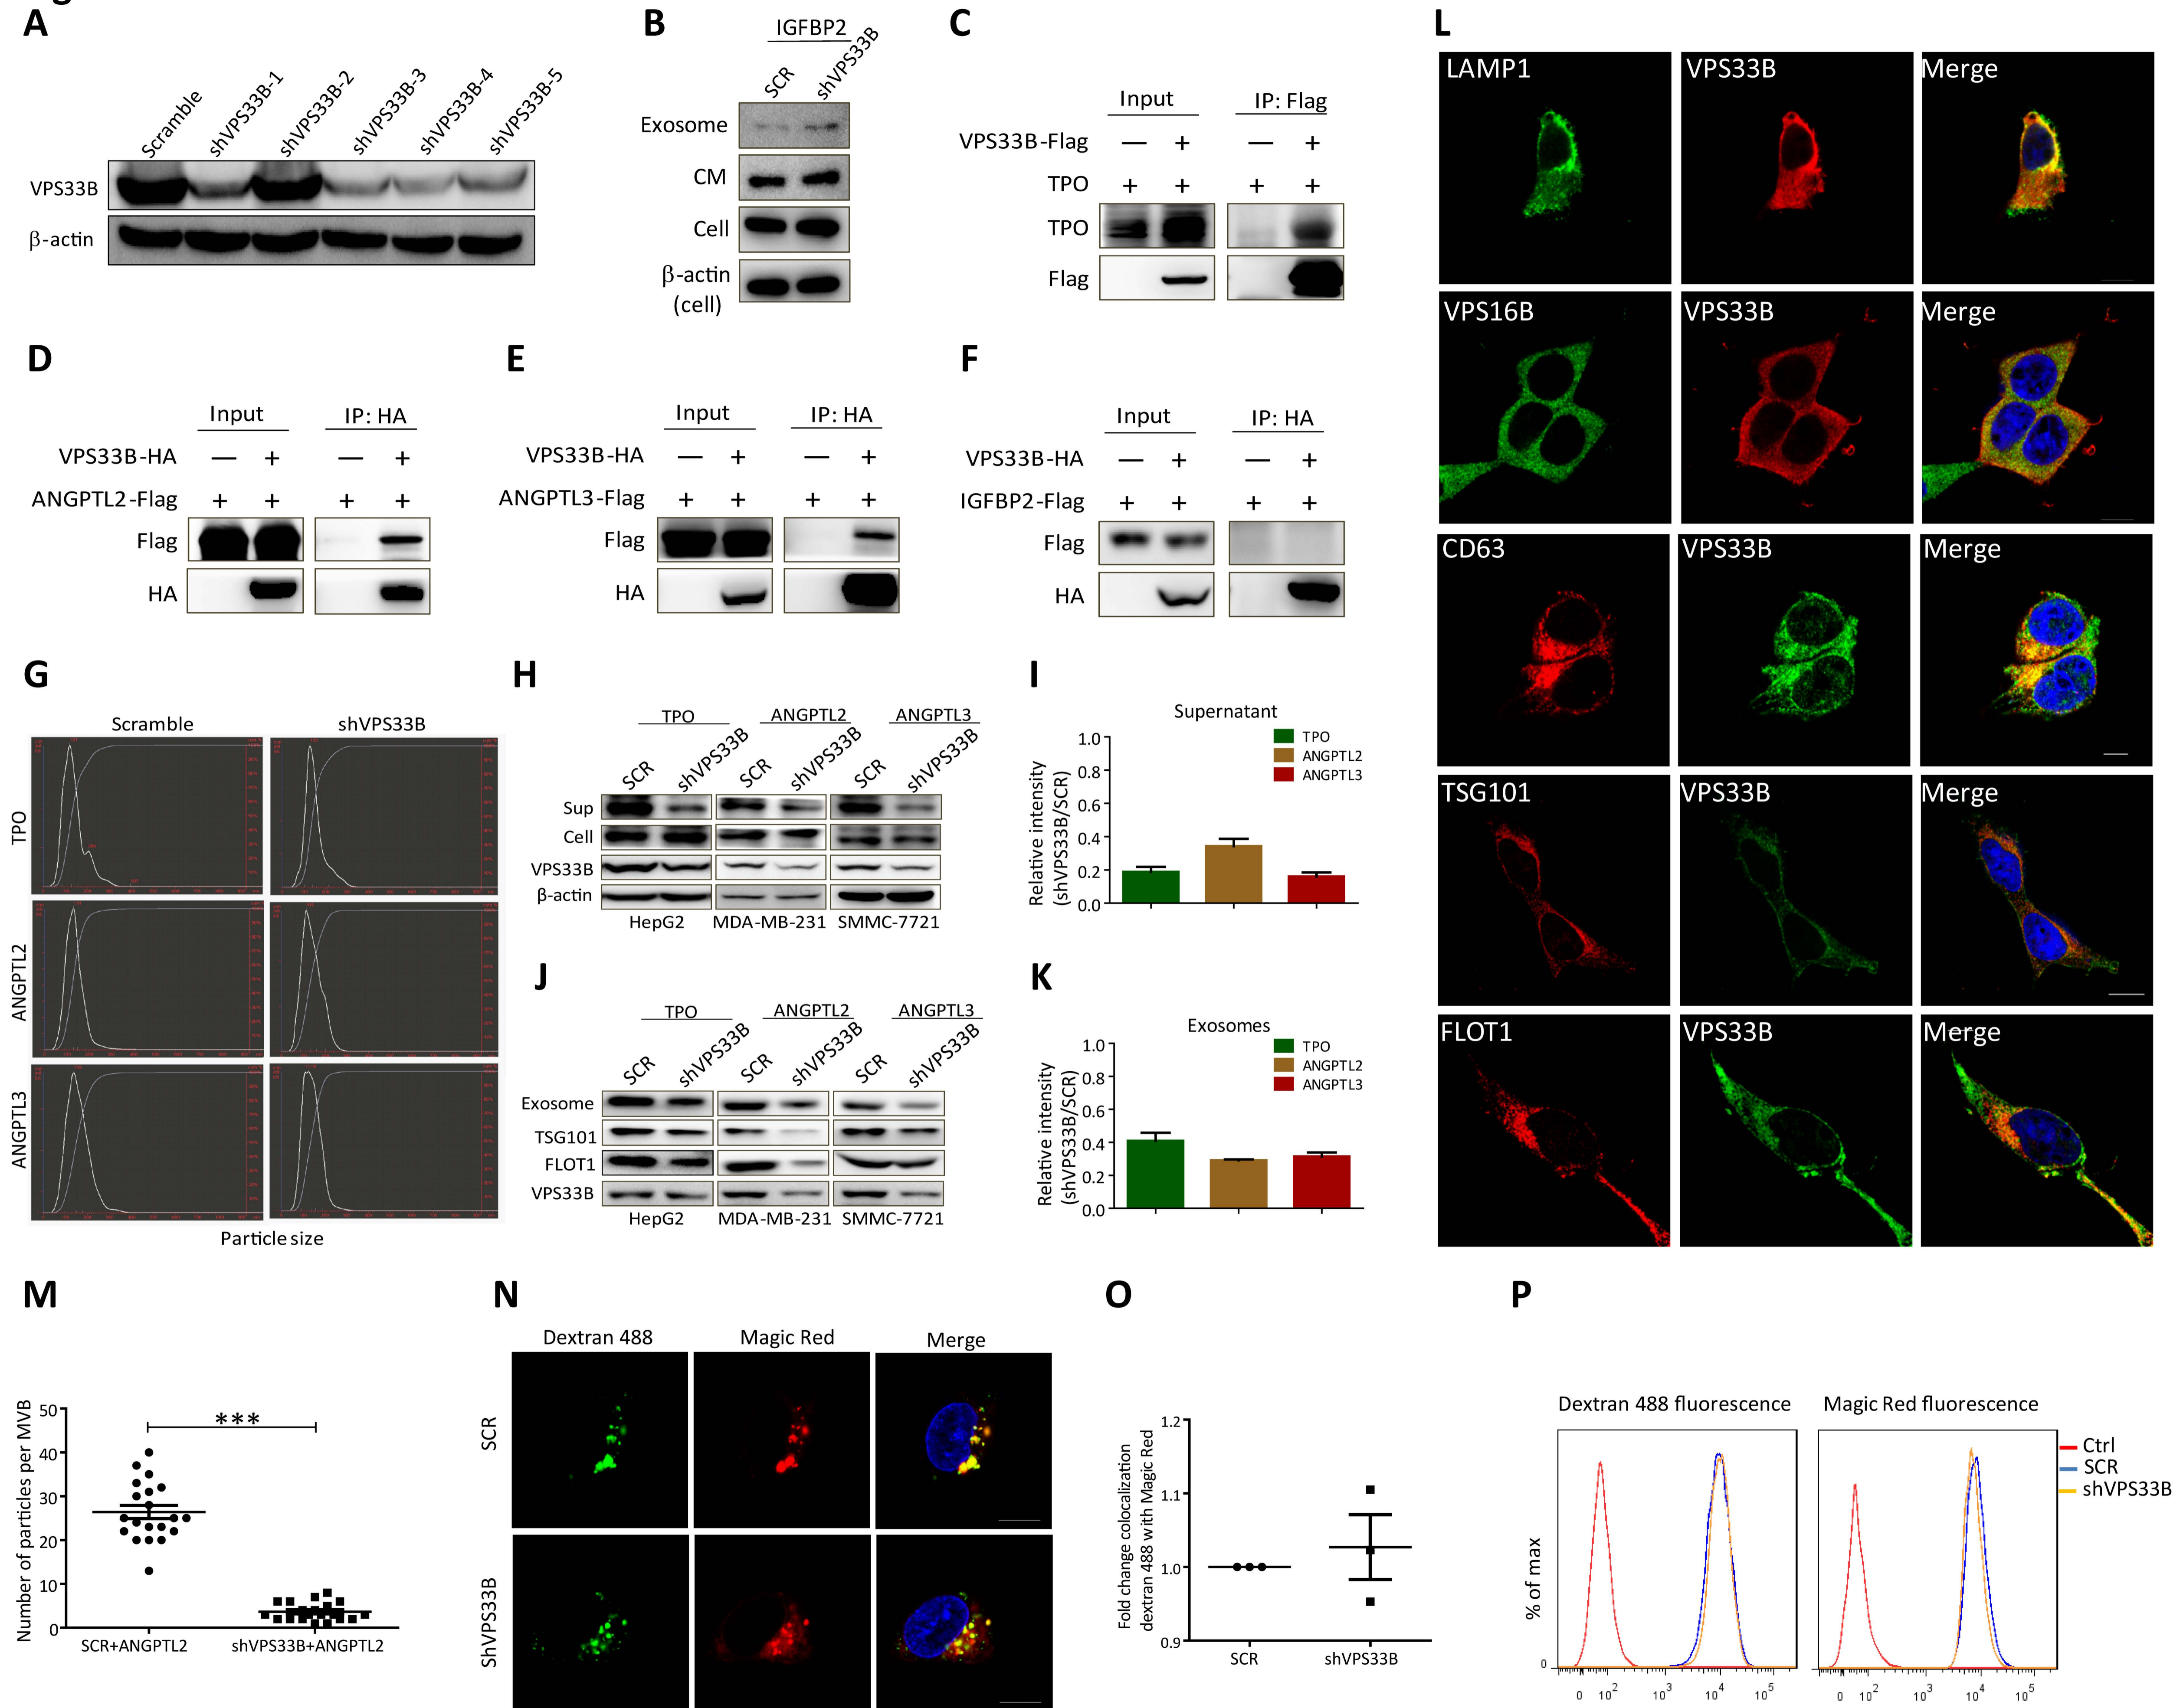



**Figure S2. VPS33B regulates the release of growth factor-containing exosomes.** A) Knockdown efficiency of VPS33B was determined by immunoblot analysis. shVPS33B-3 were used for the subsequent studies. B) Exosomes were purified from IGFBP2-conditioned medium (CM) upon VPS33B knockdown and immunoblotted with antibodies against Flag (for IGFBP2). C-F) Co-immunoprecipitation experiments were performed by pulldown of either Flag- or HA-tagged VPS33B followed by the detection of TPO, ANGPTL2, ANGPTL3 and IGFBP2 (Flag-tagged) levels by western blotting. G) Sizes of the exosomes purified from TPO-, ANGPTL2- and ANGPTL3-conditioned medium upon VPS33B knockdown as determined by NanoSight. H) VPS33B was knocked down by the VPS33B-targeted shRNA in HepG2, MDA-MB-231 and SMMC-7721 cell lines. TPO, ANGPTL2, ANGPTL3 and VPS33B levels in the supernatant or cells were measured by immunoblot analysis. I) Quantification of immunoblotted image intensities in panel I (shVPS33B/SCR). J) Exosomes were purified from the supernatant of HepG2, MDA-MB-231 and SMMC-7721 cell lines upon VPS33B knockdown and immunoblotted with indicated antibodies. K) Quantitative data for the indicated proteins in panel J (shVPS33B/SCR) (n=3). L) 293T cells transfected with VPS33B (red or green) were costained with LAMP1 and VPS16B (green) or the exosome markers CD63, TSG101 and FLOT1 (red) to evaluate their colocalization, respectively. M) Quantitative data for the number of gold particles (indicated for ANGPTL2) in 80-100 of MVBs in total 20 of cells upon VPS33B knockdown (n=20, *t* test; \*\*\**p*<0.001). N-O) Cells were subjected to live cell microscopy upon VPS33B knockdown. Quantification of colocalization of Alexa Fluor® 488-labeled dextran (green) with Magic Red® (red) shown in (N). Three independent experiments with 30 fields each, 30-50 of cells per field, were counted (O). P) Flow cytometric analysis of Alexa Fluor 488-labeled dextran or Magic Red® fluorescence of 293T cells upon VPS33B knockdown. Scale bar for immunostaining, 10µm. Experiments were conducted 3-5 times for validation.

**Figure S3**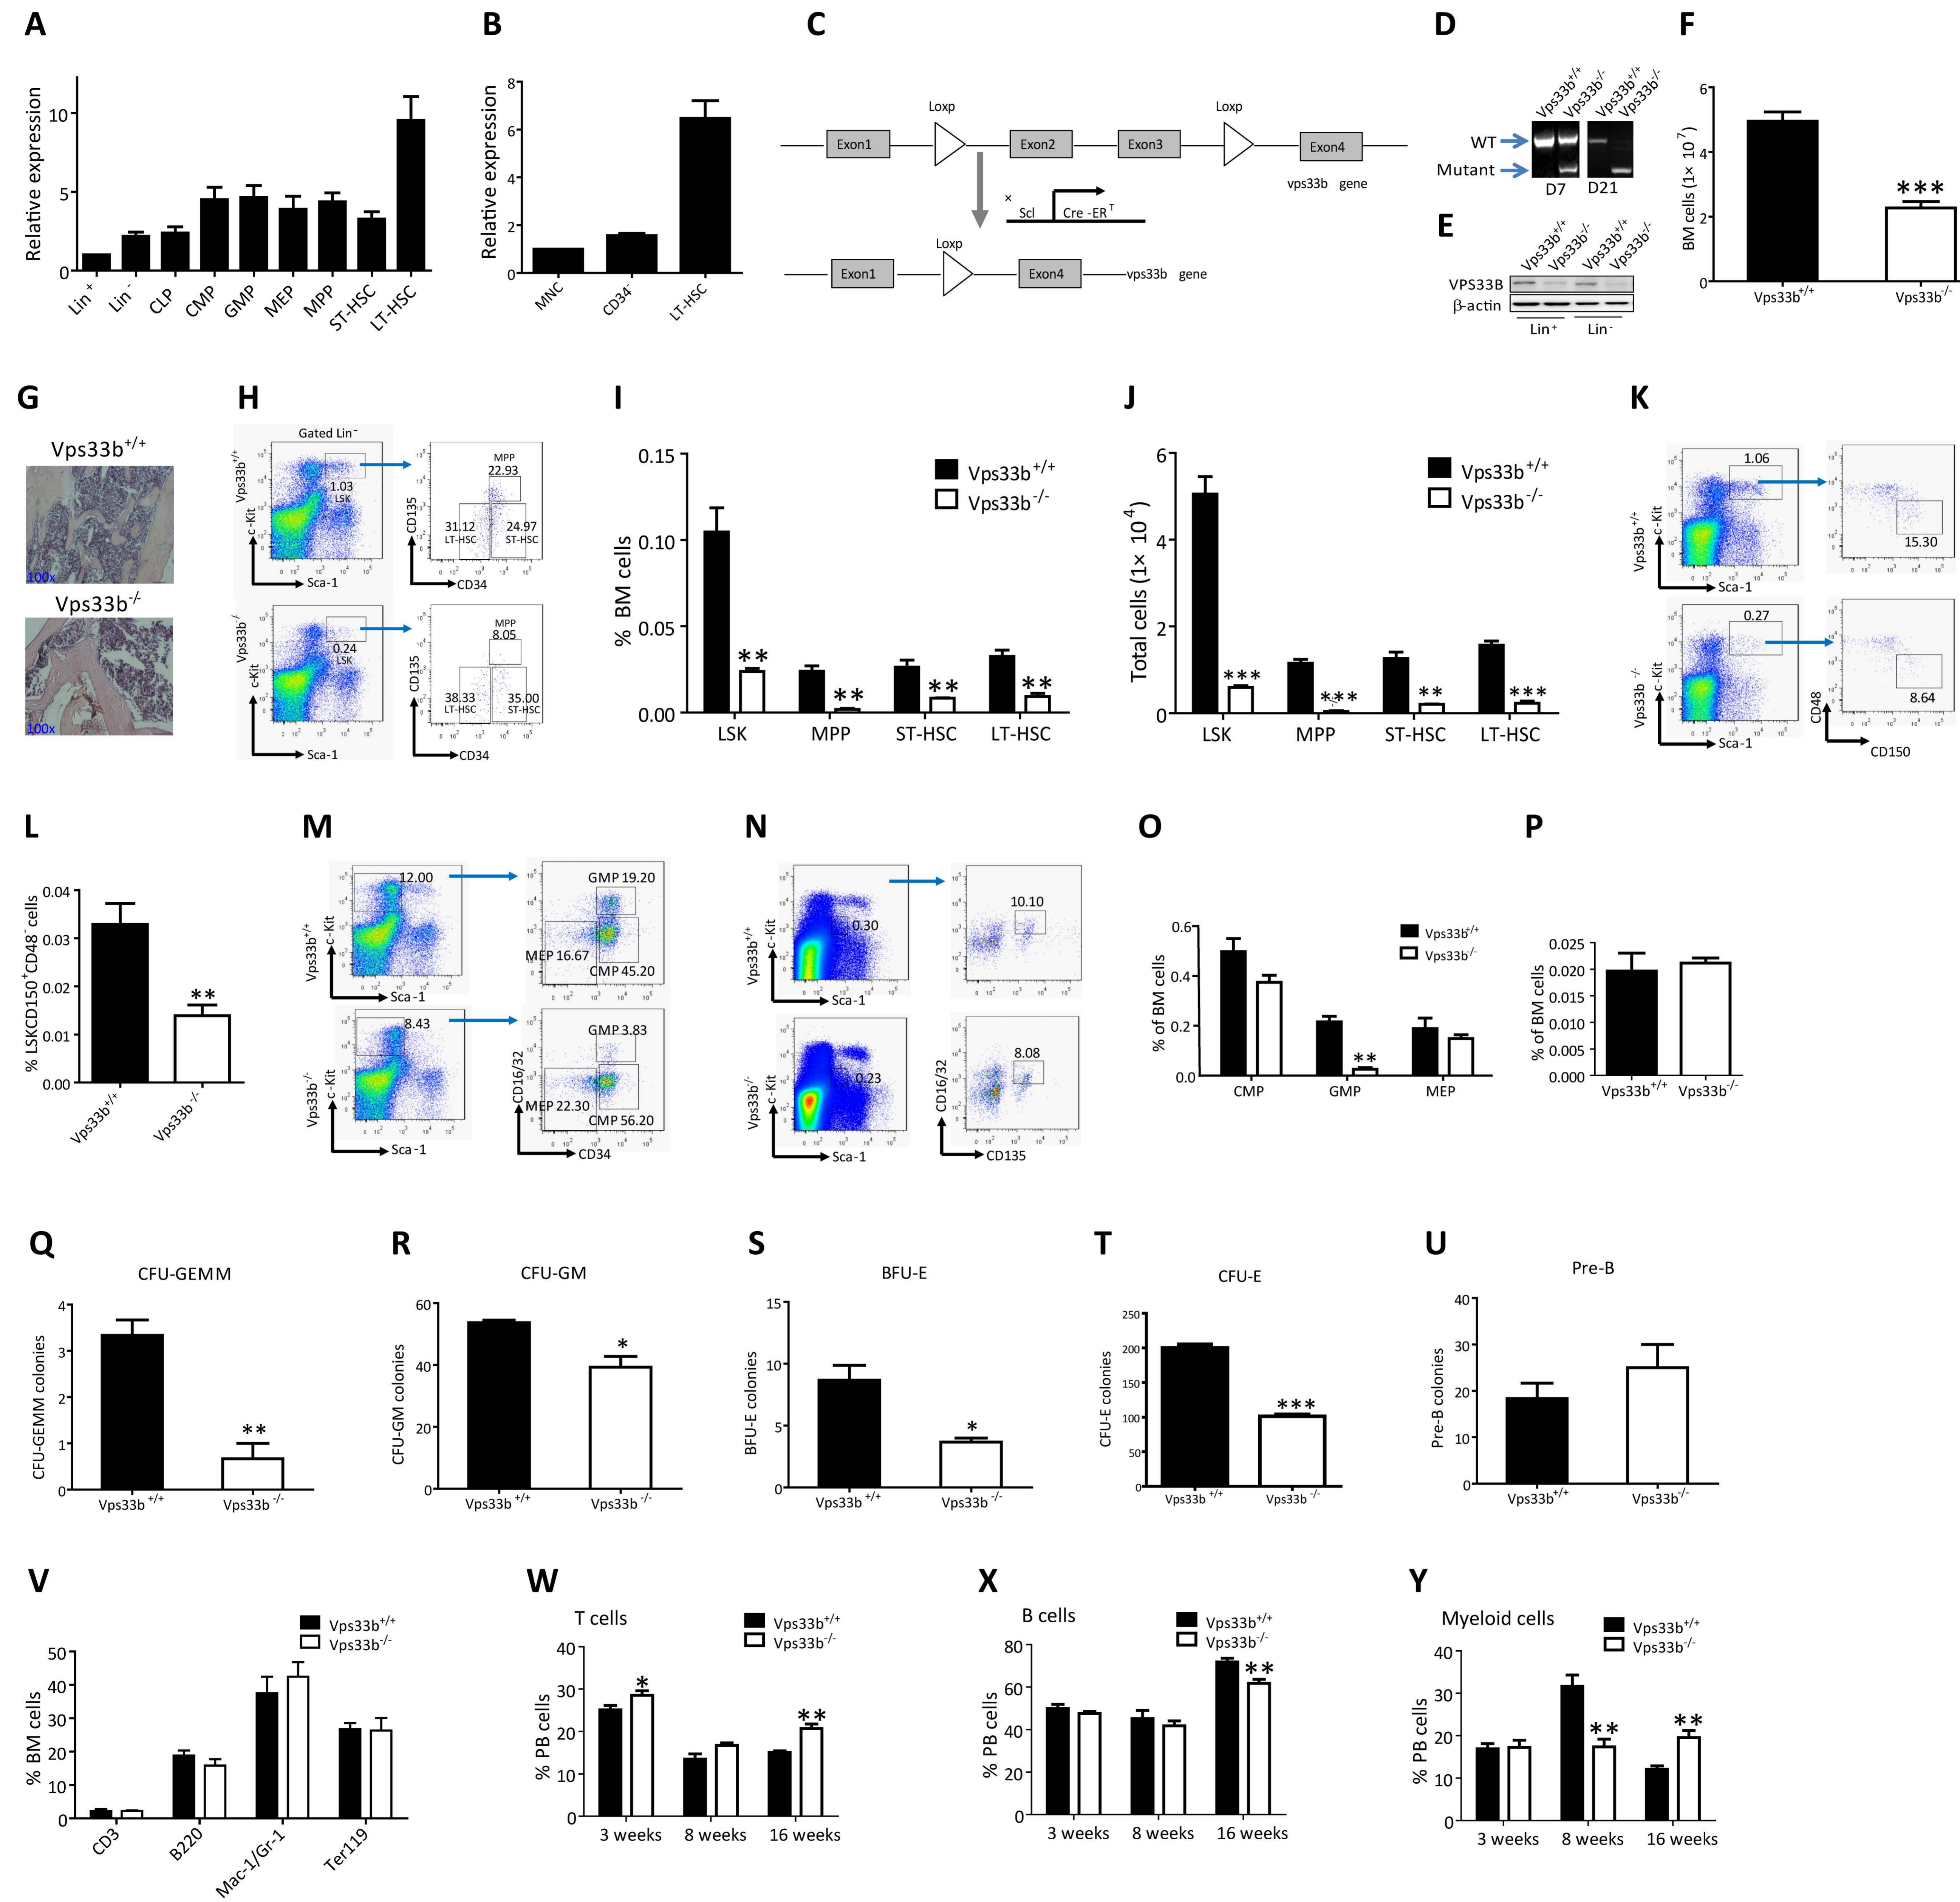

**Figure S3. VPS33B maintains the HSC pool in BM.** A-B) mRNA levels of VPS33B were measured by quantitative RT-PCR in either mouse BM Lin<sup>+</sup>, Lin<sup>-</sup> cells, CLP, CMP, GMP, MEP, MPP, ST-HSCs and LT-HSCs, or human cord blood CD34<sup>+</sup>CD38<sup>-</sup>CD90<sup>+</sup>CD45RA<sup>-</sup> LT-HSCs, CD34<sup>-</sup> cells and mononuclear cells (MNC) (n=3). C) Schematic of the VPS33B floxed allele showing the deletion of floxed exons 2 and 3 following Cre recombinase activity. Use of *Scl-Cre-ER<sup>T</sup>* results in specific deletion in HSCs following tamoxifen treatment. D-E) VPS33B deletion was evaluated by genotyping peripheral blood cells (7 or 21 days) or western blotting (21 days) after tamoxifen administration. F) The total number of BM cells was calculated in 8-10-week-old VPS33B<sup>+/+</sup> and VPS33B<sup>-/-</sup> mice (day 21, n=14, *t* test; \*\*\*p<0.001). G) Representative hematoxylin/eosin staining in femurs of VPS33B<sup>+/+</sup> and VPS33B<sup>-/-</sup> mice (day 21). H-J) Representative flow cytometric analyses and quantification of frequencies and numbers of LSK (Lin<sup>-</sup>Sca-1<sup>+</sup>c-Kit<sup>+</sup>) cells, MPP, ST-HSCs and LT-HSCs from VPS33B<sup>+/+</sup> and VPS33B<sup>-/-</sup> mice in a representative experiment (day 21, n=3, *t* test; \*\*p<0.01, \*\*\*p<0.001). K-L) Representative flow cytometric analyses and quantification data of LT-HSCs (Lin<sup>-</sup>Sca-1<sup>+</sup>c-Kit<sup>+</sup>CD150<sup>+</sup>CD48<sup>-</sup>) from VPS33B<sup>+/+</sup> and VPS33B<sup>-/-</sup> mice (day 21, n=10, *t* test; \*\*p<0.01). M-P) Representative flow cytometric analysis and quantification data for CMP, GMP, MEP and CLP from VPS33B<sup>+/+</sup> and VPS33B<sup>-/-</sup> mice (day 21, n=5, *t* test; \*\*p<0.01). Q-U) Total BM cells were seeded in methylcellulose medium M3434 for the quantification of CFU-GEMM, CFU-GM, and BFU-E colonies, in M3334 for the quantification of CFU-E colonies and in M3630 for the quantification of CFU-pre-B colonies (n=3, *t* test; \*p<0.05, \*\*p<0.01, \*\*\*p<0.001). V) Lineages in the BM of VPS33B<sup>+/+</sup> and VPS33B<sup>-/-</sup> mice were quantified for T cells (CD3<sup>+</sup>), B cells (B220<sup>+</sup>), myeloid cells (Mac-1<sup>+</sup>/Gr-1<sup>+</sup>) and erythroid cells (Ter119<sup>+</sup>) 3 weeks after tamoxifen treatment (n=3). W-Y) Lineages in peripheral blood from VPS33B<sup>+/+</sup> and VPS33B<sup>-/-</sup> mice were quantified at the indicated time points after tamoxifen treatment (n=6, *t* test; \*p<0.05, \*\*p<0.01). Experiments were conducted 3-4 times for validation.

**Figure S4**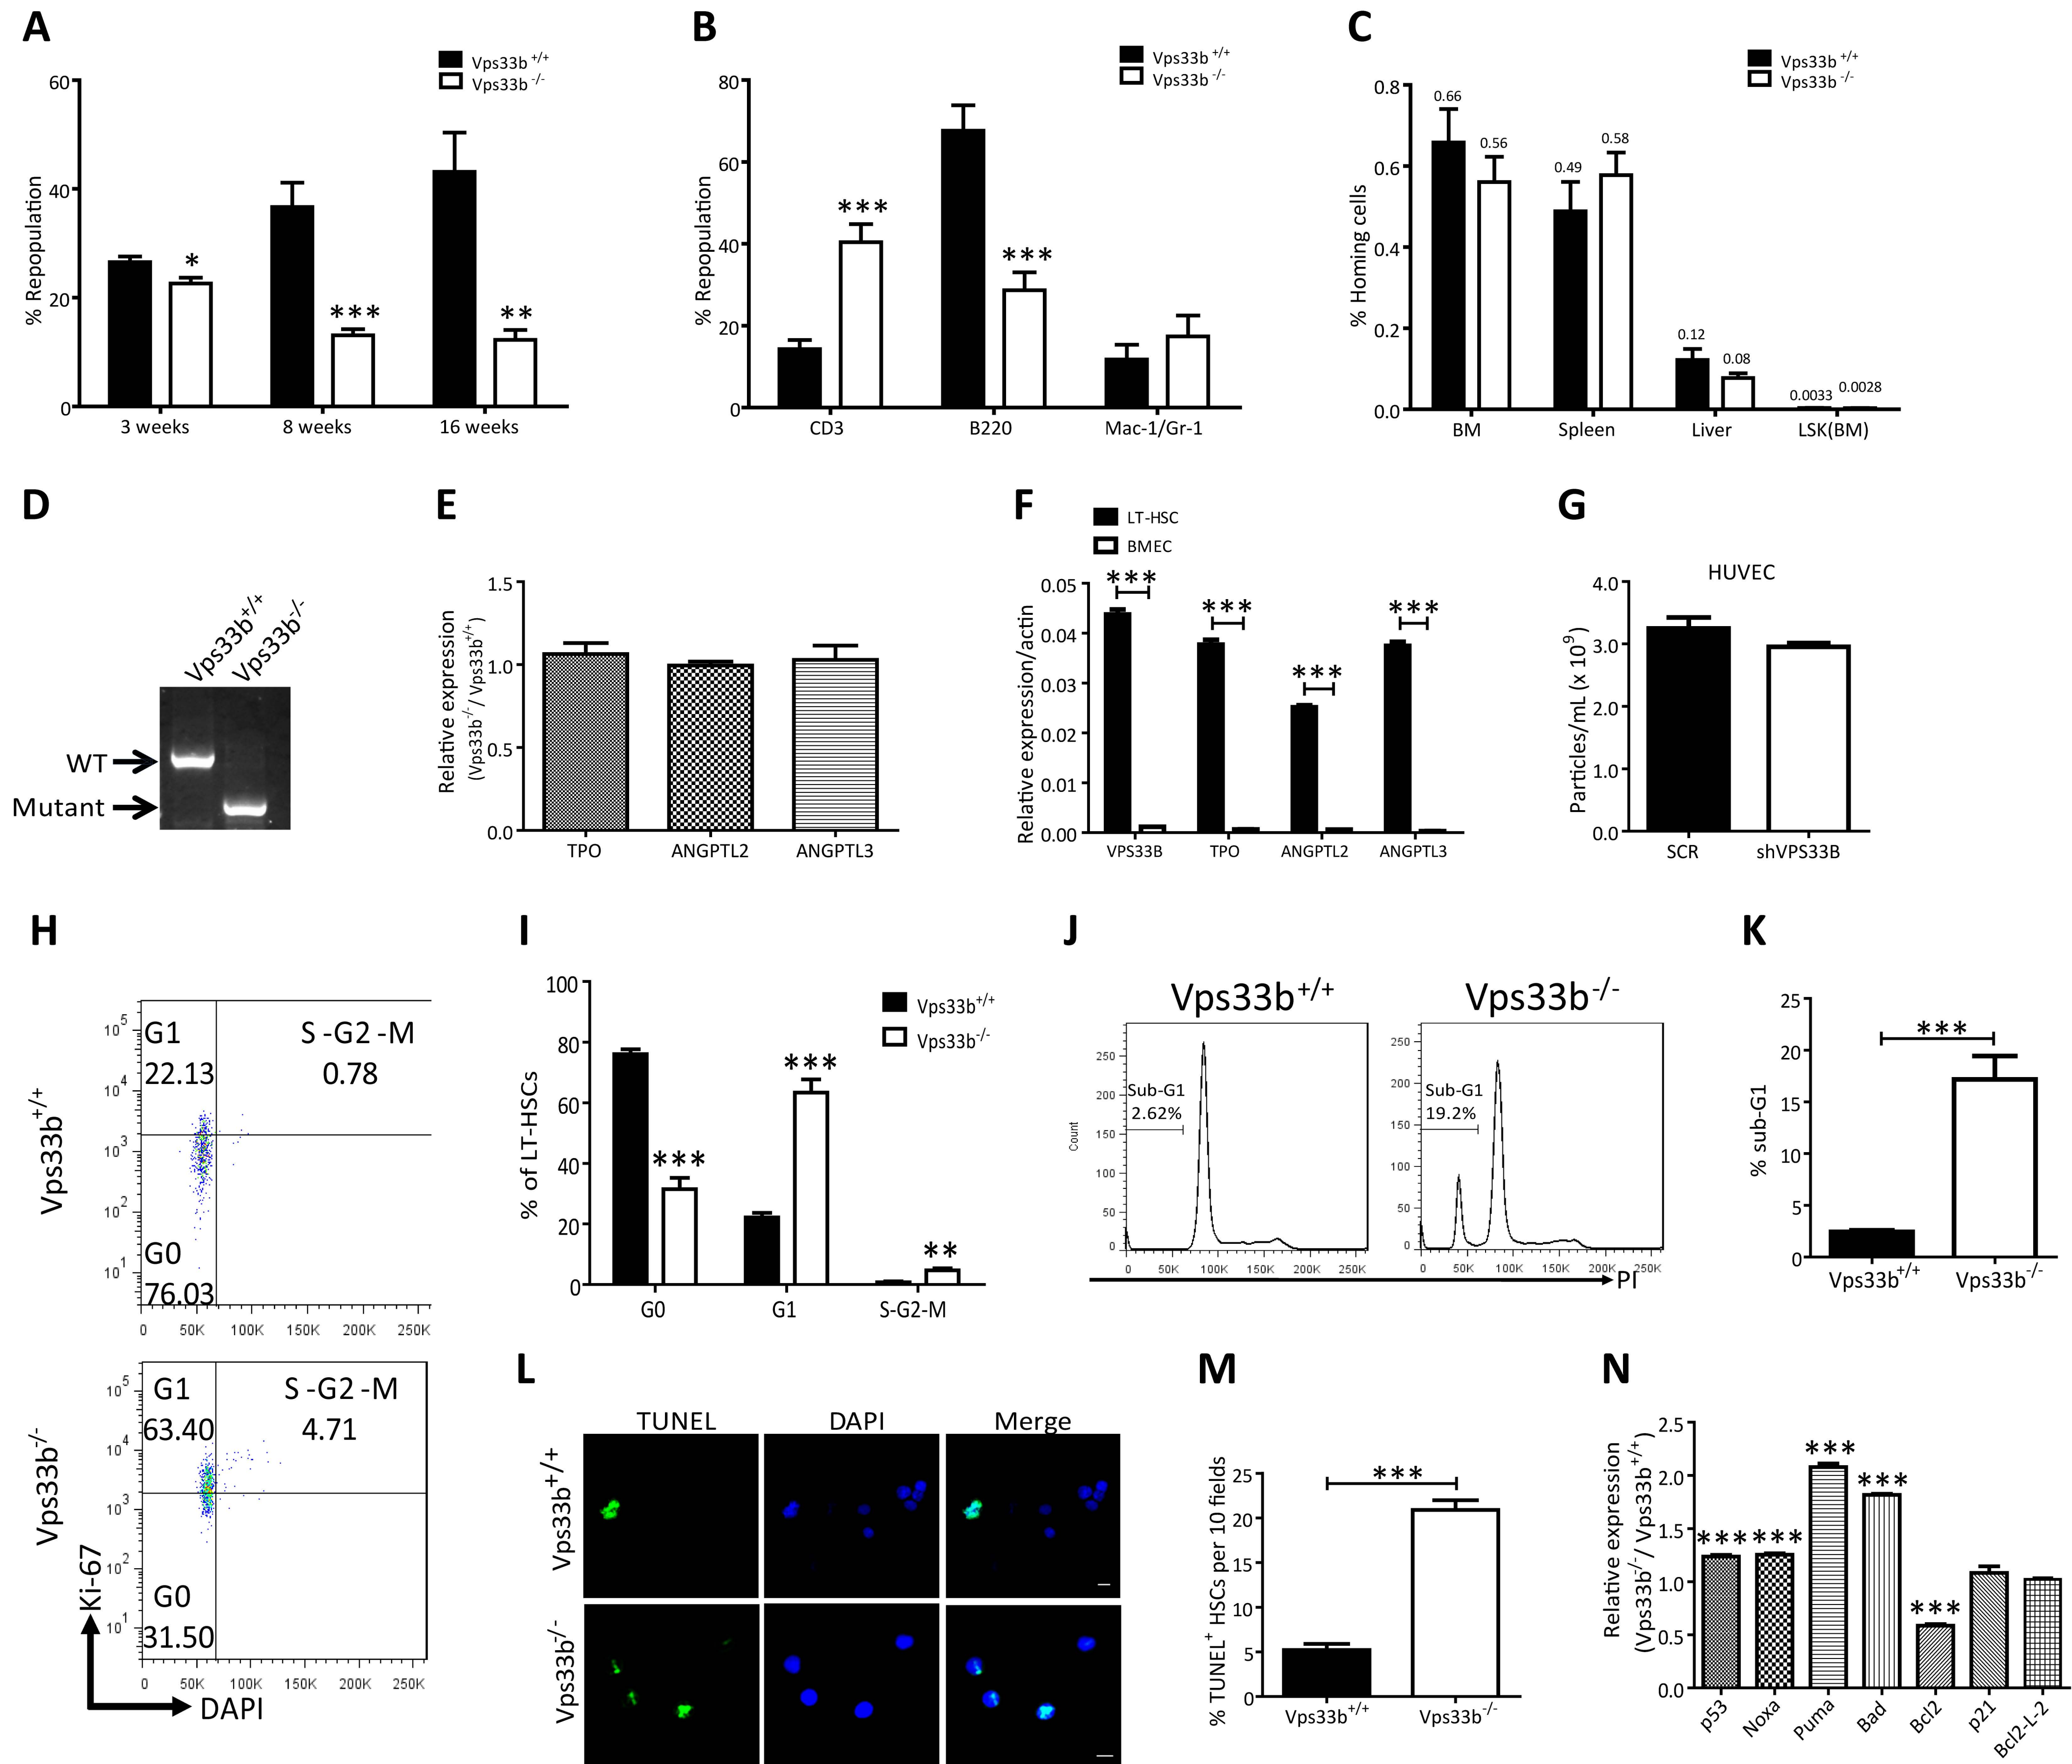

**Figure S4. VPS33B is required for HSC repopulation abilities.** A) Five hundred WT and VPS33B-null LT-HSCs along with  $3 \times 10^5$  CD45.1 competitor cells were injected into lethally irradiated CD45.1 recipient mice (n=5, *t* test; \**p*<0.05, \*\**p*<0.01, \*\*\**p*<0.001). Repopulation was analyzed at 3, 8 and 16 weeks post-transplantation. B) Multilineage contribution of donor cells in the recipients at 16 weeks post-transplantation (n=5, *t* test; \*\*\**p*<0.001). C) BM cells from VPS33B<sup>+/+</sup> and VPS33B<sup>-/-</sup> mice were labeled with CFSE and injected into lethally irradiated recipients. Frequency of CFSE<sup>+</sup> cells in the BM, spleen, and liver as well as HSCs (CFSE<sup>+</sup>Lin<sup>-</sup>Sca-1<sup>+</sup>c-Kit<sup>+</sup> cells) in the BM were measured by flow cytometry at 16 h post-transplantation (n=5). D) *Vps33b* deletion was evaluated by genotyping CD45<sup>-</sup>Ter119<sup>-</sup>CD31<sup>+</sup> endothelial cells 21 days after tamoxifen administration. E) Expression levels of TPO, ANGPTL2 and ANGPTL3 were measured in VPS33B<sup>+/+</sup> and VPS33B<sup>-/-</sup> endothelial cells. F) Expression levels of VPS33B, TPO, ANGPTL2 and ANGPTL3 in LT-HSCs were compared with those in bone marrow endothelial cells (BMEC) (n=3, *t* test; \*\*\**p*<0.001). G) Exosomes were evaluated by NanoSight in control and VPS33B-knockdown HUVECs. H-I) Representative flow cytometric analysis and quantification of cell cycle status in control and VPS33B-null LT-HSCs by staining with Ki-67 and DAPI (n=3, *t* test; \*\**p*<0.01, \*\*\**p*<0.001). J-K) The cell cycle was analyzed in WT and VPS33B-null LT-HSCs by propidium iodide (PI), and the frequency of cells in sub-G1 were quantified (n=3, *t* test; \*\*\**p*<0.001). L-M) Representative images for the TUNEL assay in WT and VPS33B-null LT-HSCs (L). TUNEL<sup>+</sup> LT-HSCs are indicated in green and were quantified (M, n=30, *t* test; \*\*\**p*<0.001). N) Quantitative RT-PCR was performed in WT and VPS33B-null LT-HSCs to determine their RNA levels of p53, Noxa, Puma, Bad, Bcl2, p21 and Bcl2-L-2 (n=3, *t* test; \*\*\**p*<0.001). Experiments were conducted 3 times for validation.

**Figure S5****A**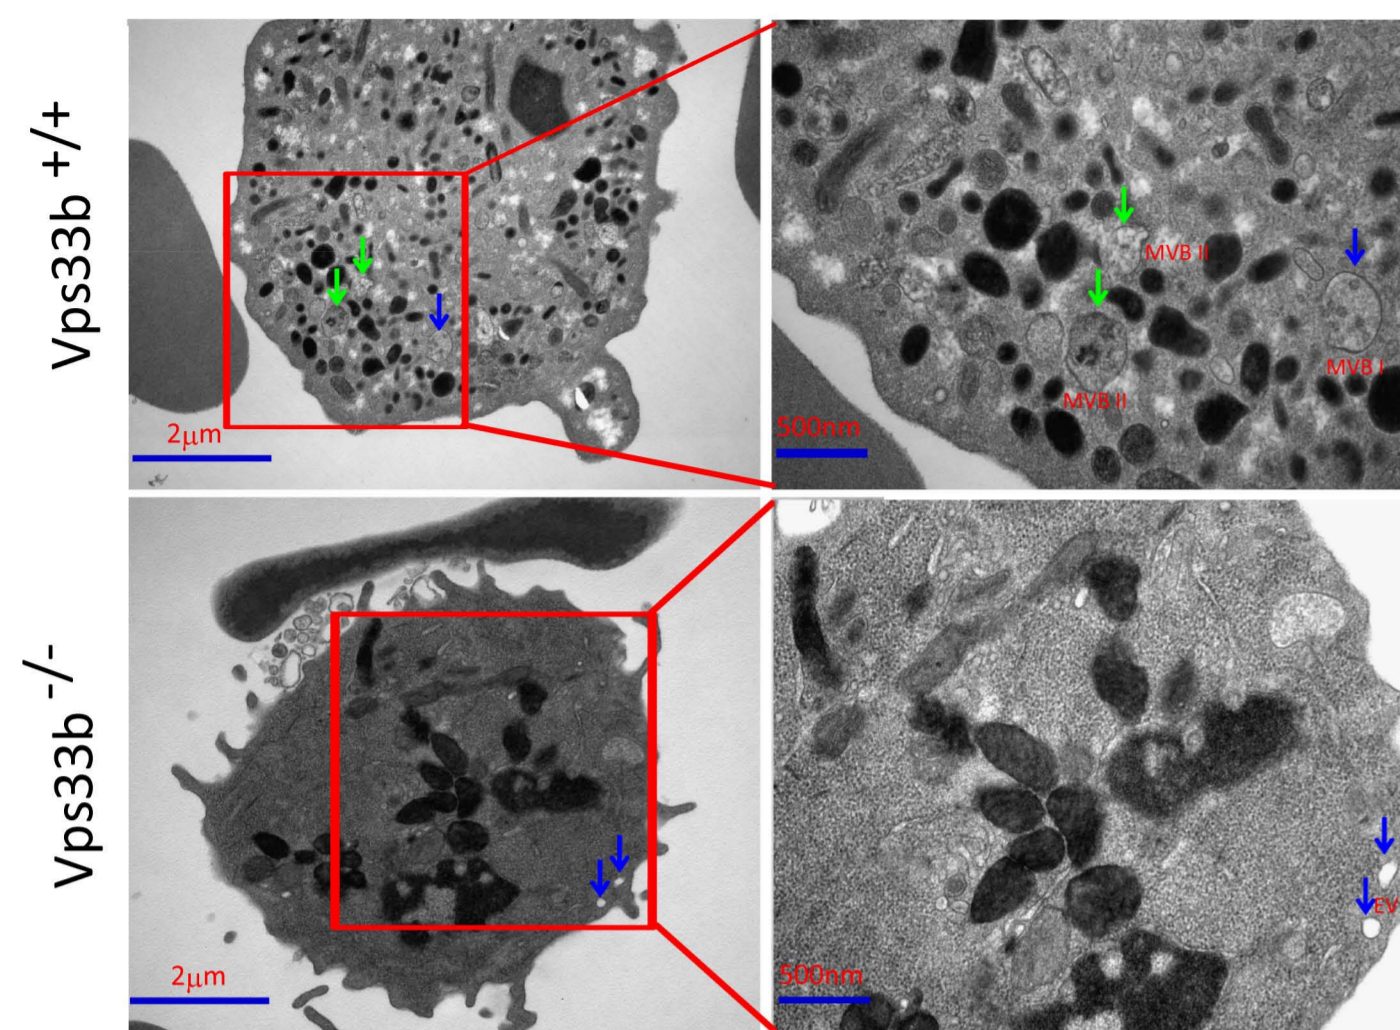**B**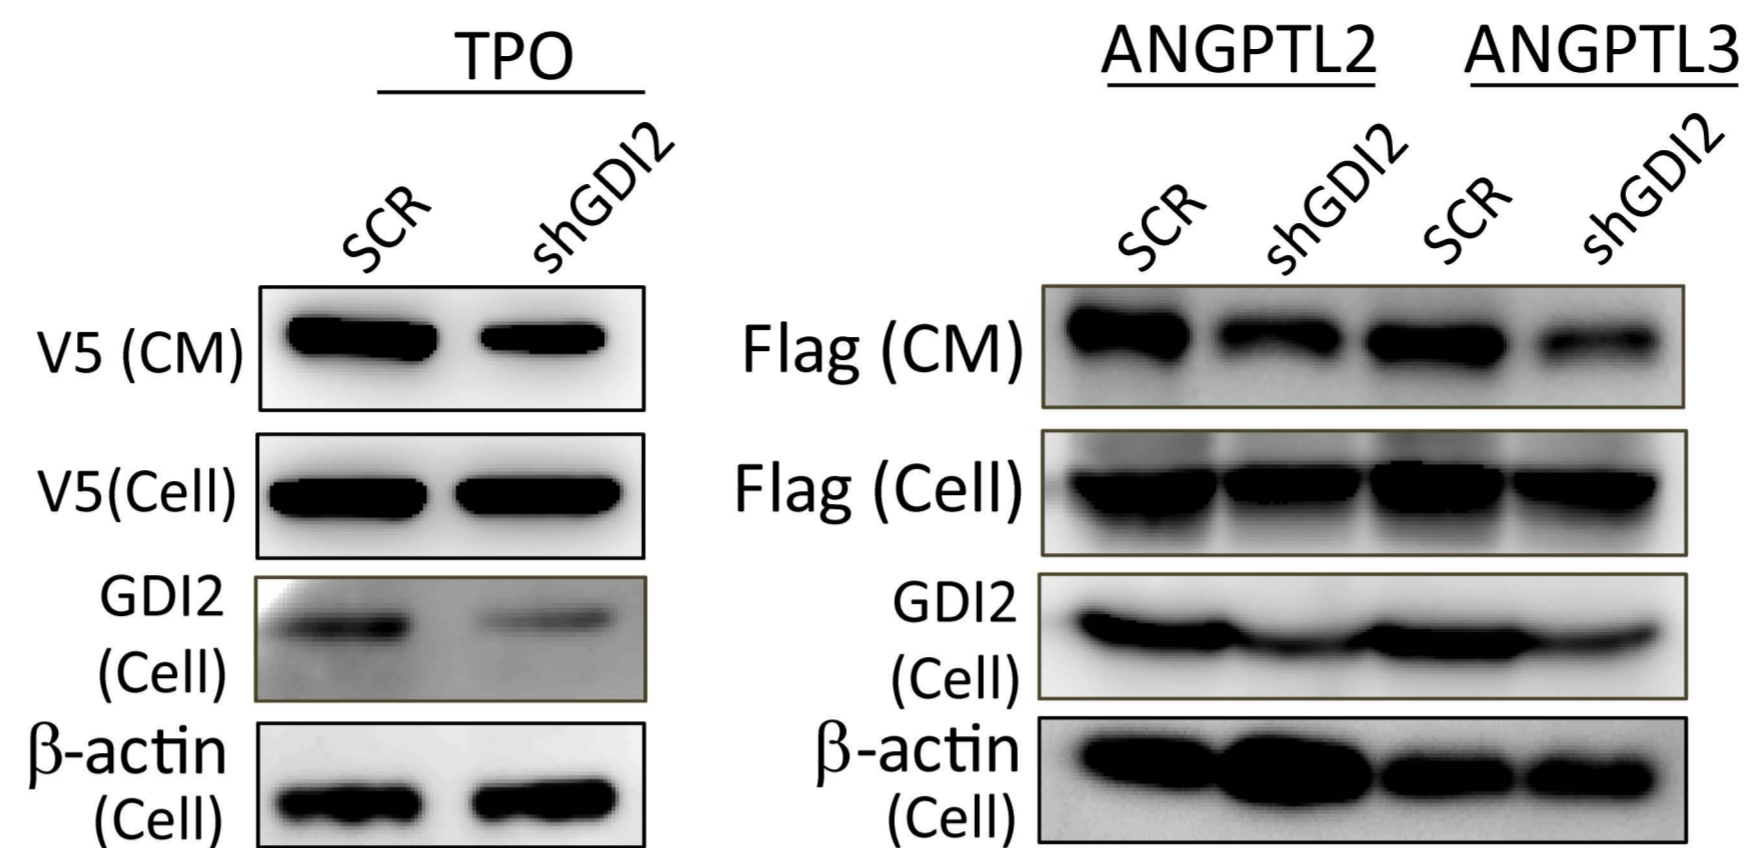**C**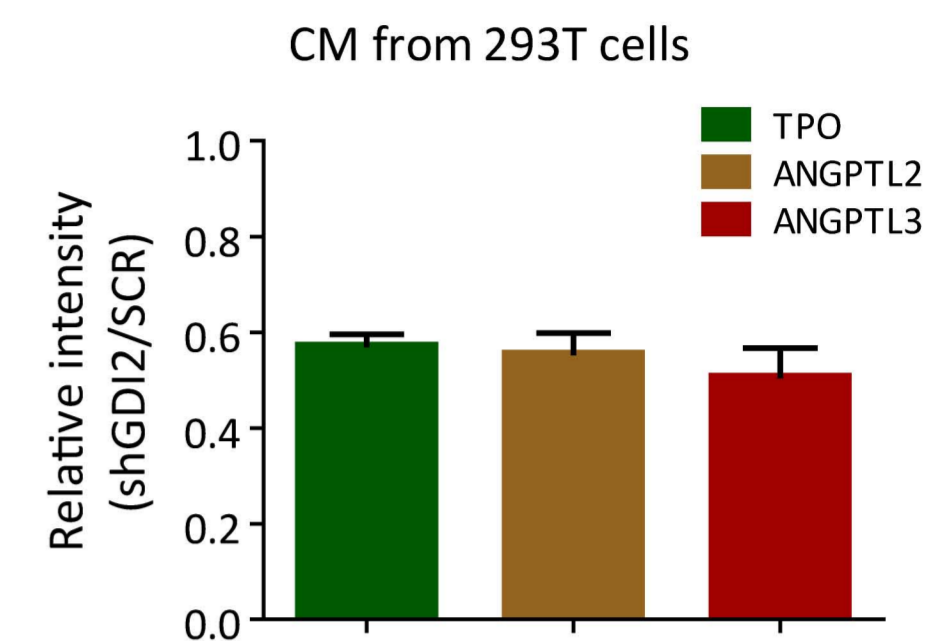**D**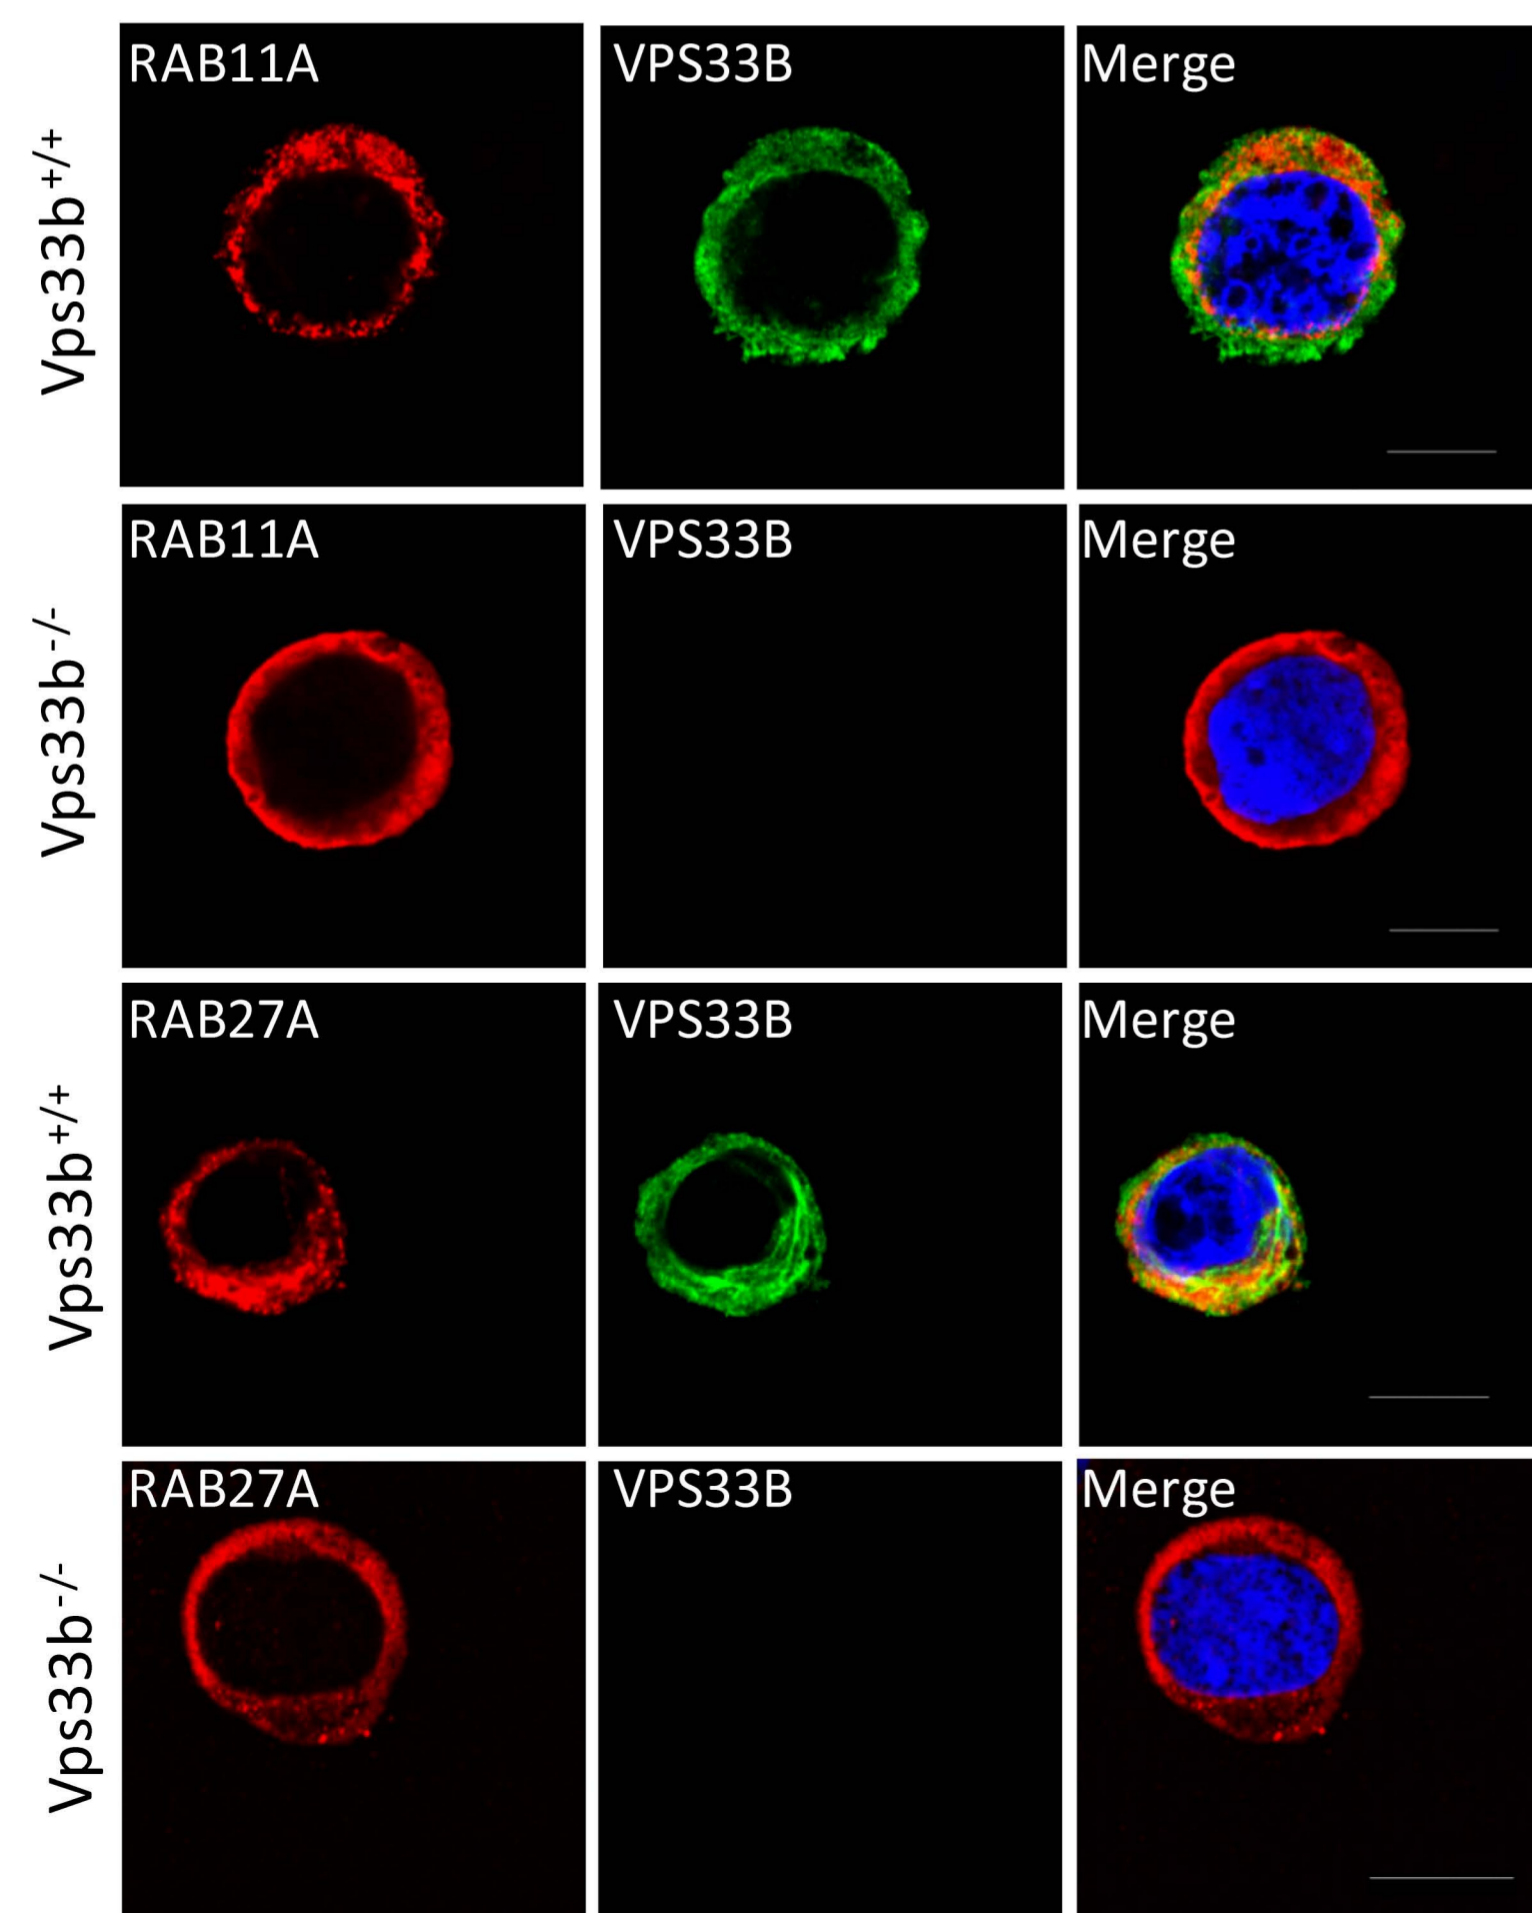**E**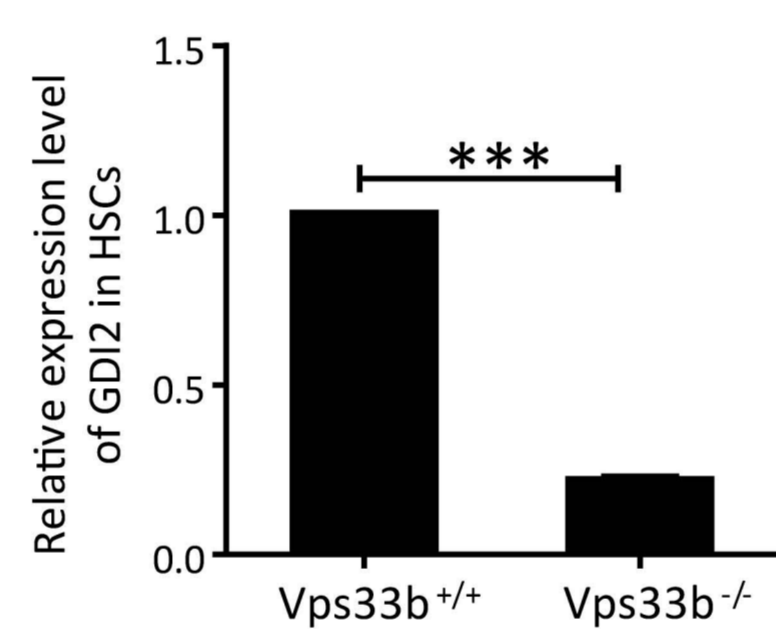**F**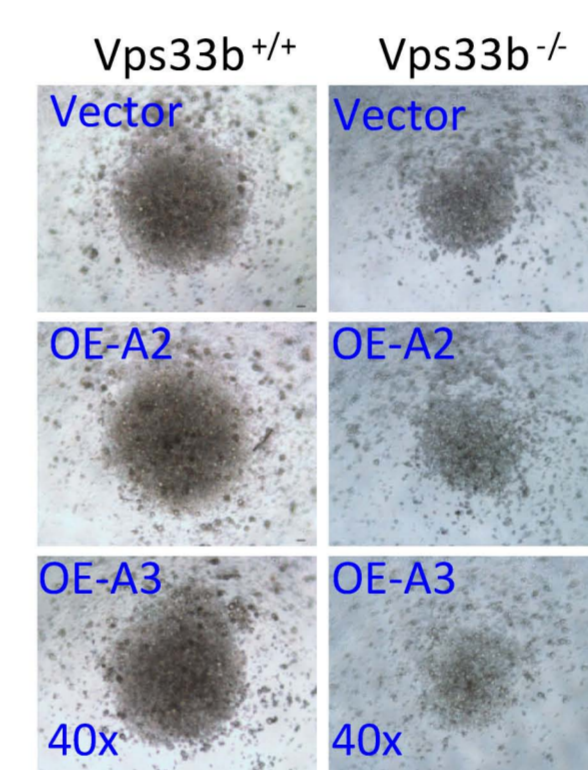**G**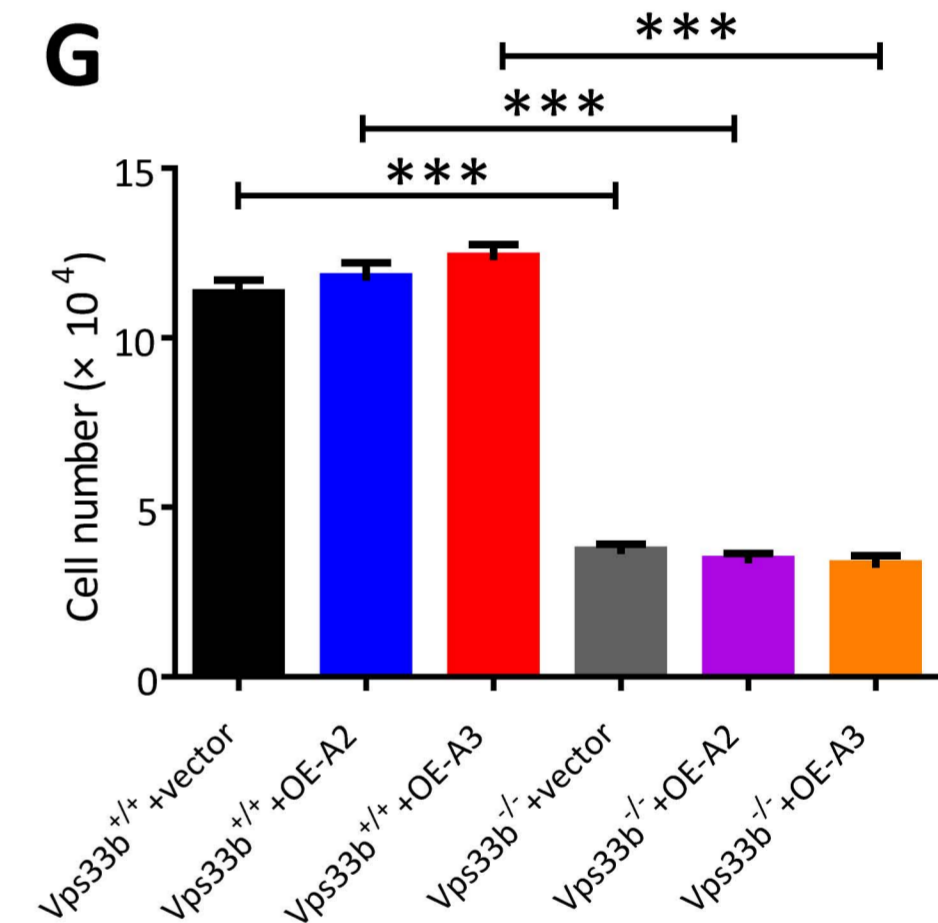**H**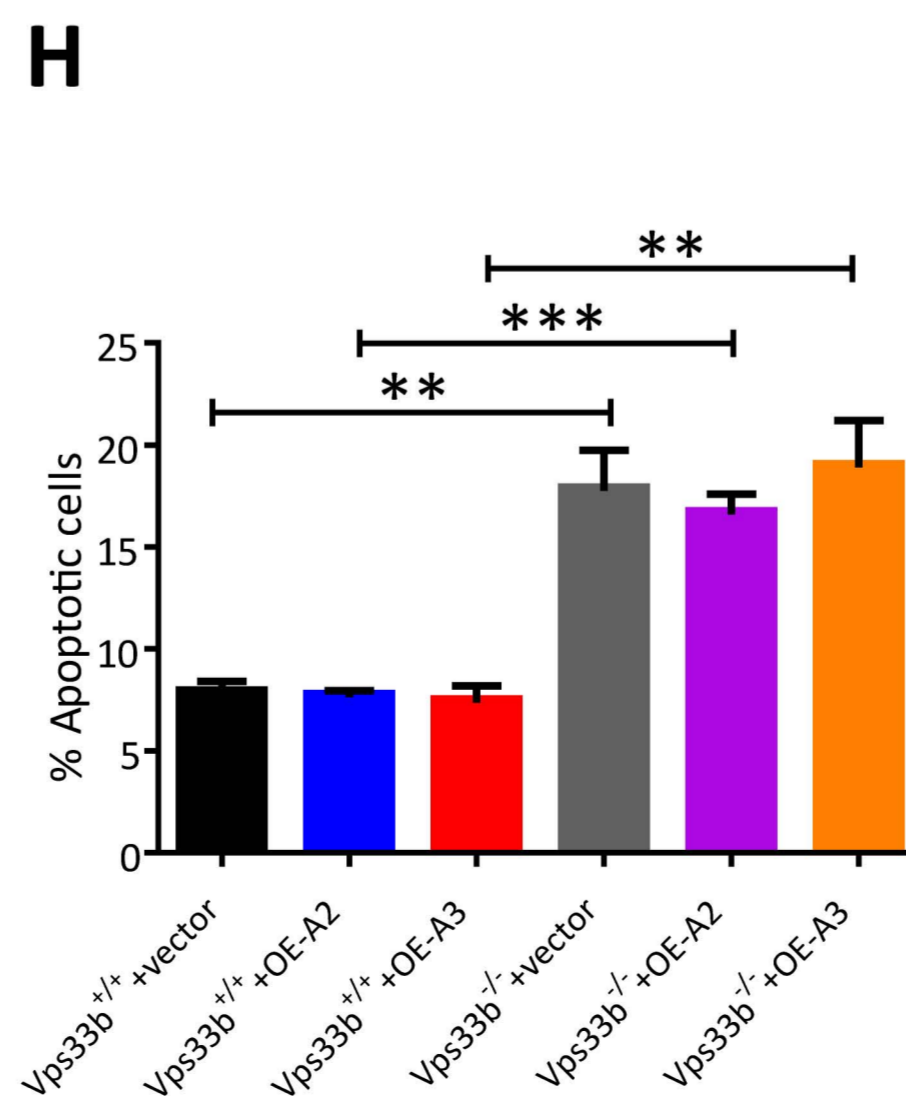**I**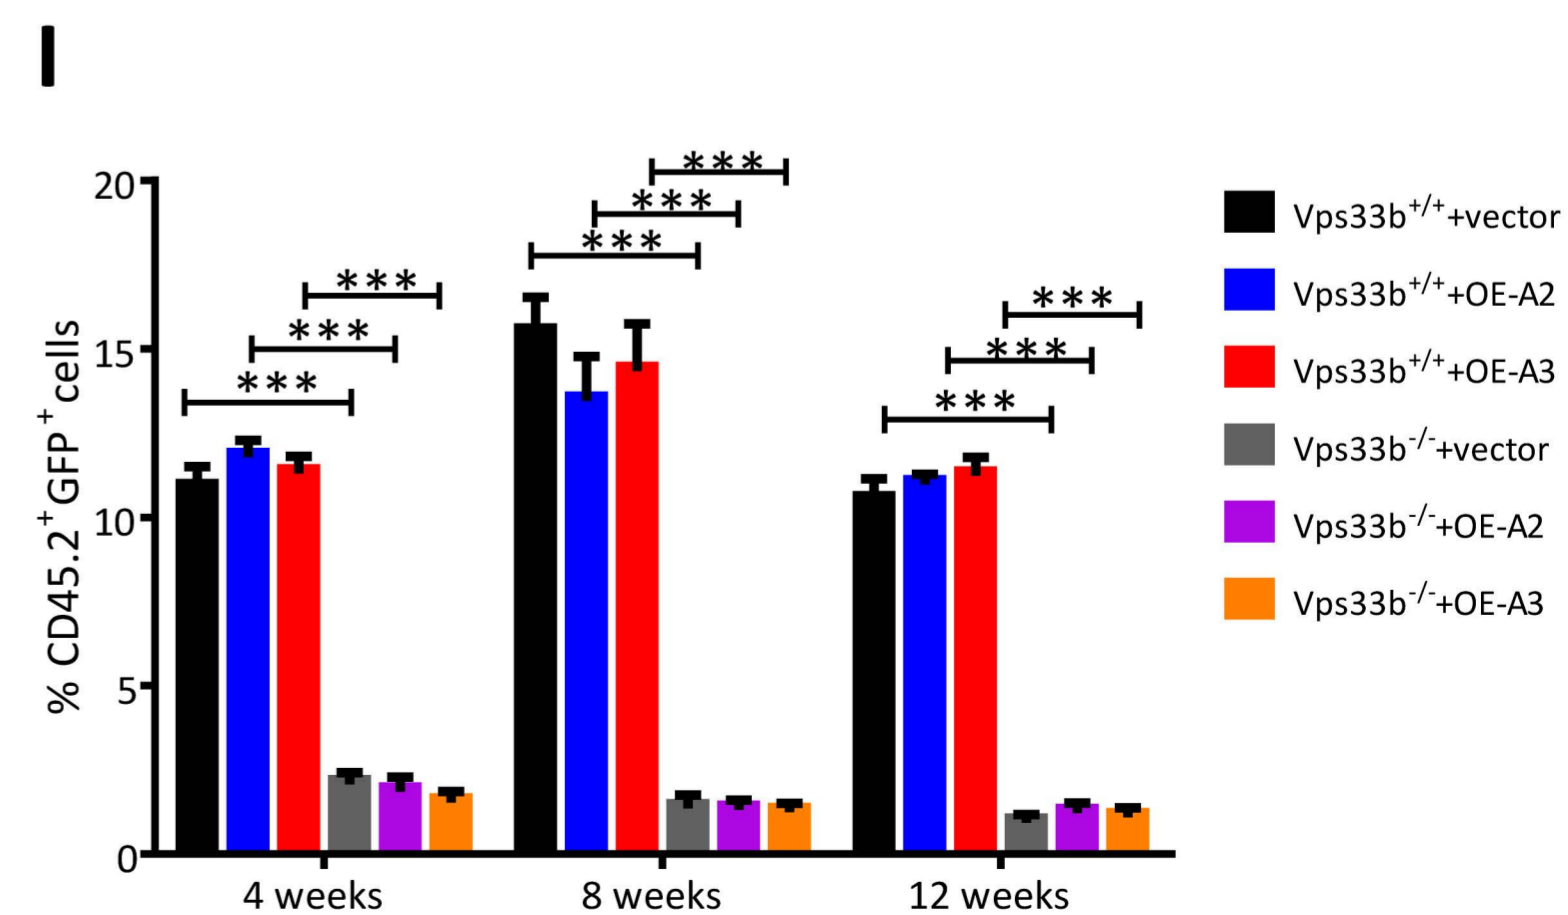

**Figure S5. VPS33B/GDI2 is required for HSC repopulation.** A) Representative transmission electron micrographs of LT-HSCs from VPS33B<sup>+/+</sup> and VPS33B<sup>-/-</sup> mice showing representative images of EV, MVB I (blue arrows) and MVB II (green arrow). B) 293T cells stably expressing TPO, ANGPTL2 or ANGPTL3 were treated with either validated GDI2 shRNA (shGDI2) or scramble control (SCR). TPO (V5-tagged), ANGPTL2 and ANGPTL3 (Flag-tagged) levels in the conditioned medium and cells were measured by immunoblot analysis. GDI2 levels upon knockdown were also confirmed. C) Quantification of immunoblotted image intensities for TPO, ANGPTL2 and ANGPTL3 levels in panel B. D) Protein levels and colocalization of VPS33B with RAB11A and RAB27A were evaluated in WT and VPS33B-null LT-HSCs by immunostaining (scale bar, 10 $\mu$ m). E) GDI2 expression levels were examined in WT and VPS33B-null LT-HSCs by quantitative RT-PCR (n=3, *t* test; \*\*\*p<0.001). F) Either ANGPTL2 or ANGPTL3 was overexpressed in WT and VPS33B-null LT-HSCs (referred to as vector, OE-A2, and OE-A3) and cultured for 6 days; representative images are shown. G-H) Cell numbers and apoptosis were measured in cultured WT and VPS33B-null LT-HSCs in panel F (n=5, *t* test; \*\*p<0.01, \*\*\*p<0.001). I) ANGPTL2 and ANGPTL3 were overexpressed in WT and VPS33B-null HSCs, which were subjected to competitive reconstitution analysis. Engraftment was analyzed at 4, 8 and 12 weeks post-transplantation (n=5, *t* test; \*\*\*p<0.001). Experiments were conducted 3 times for validation.

**Figure S6****A**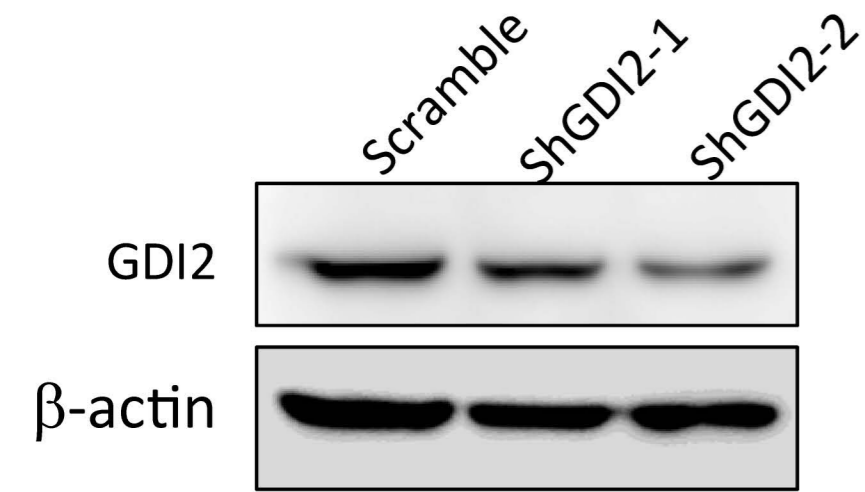**B**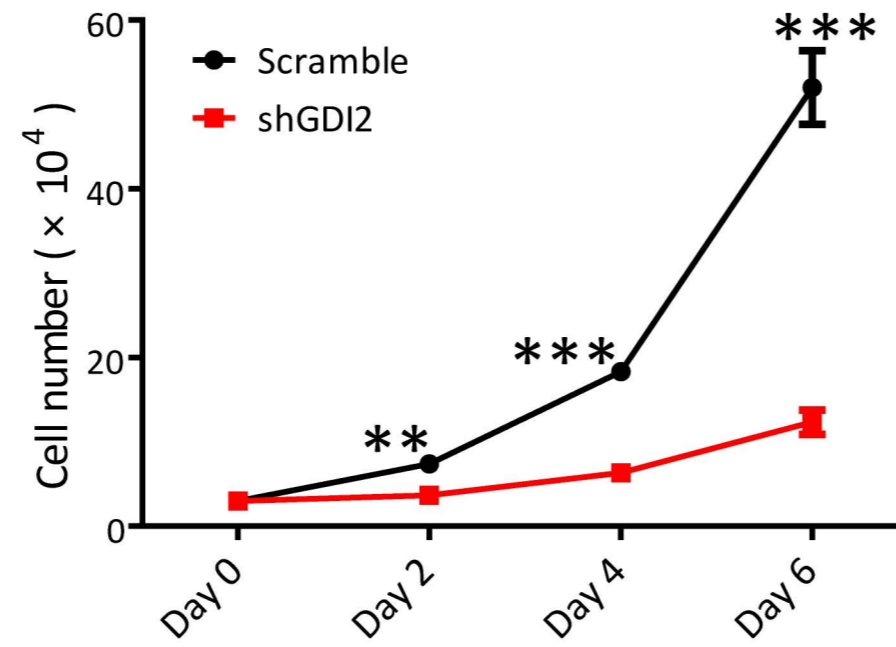**C**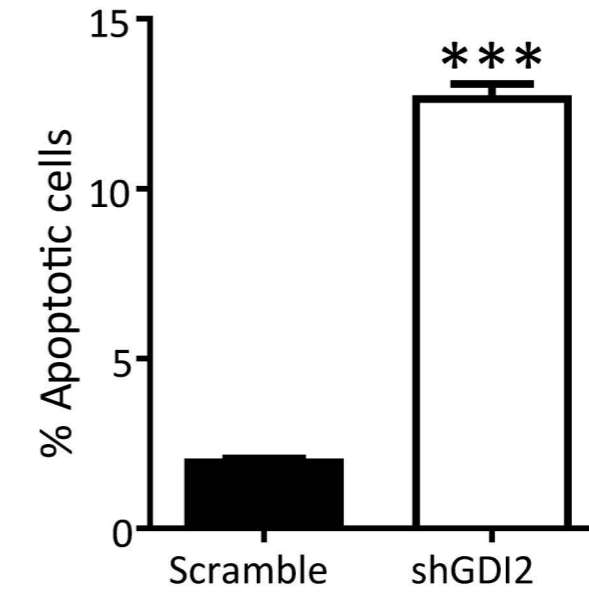**D**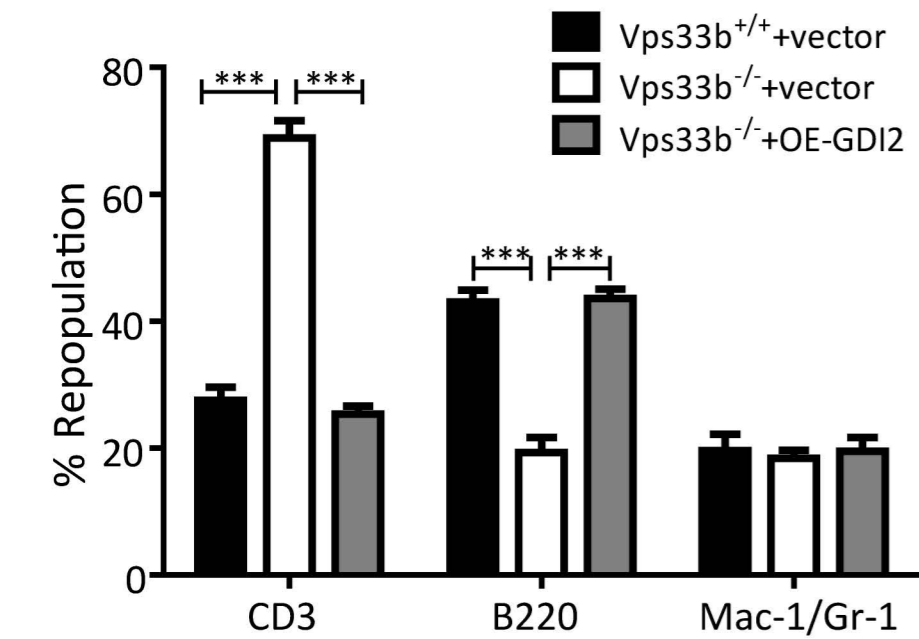**E**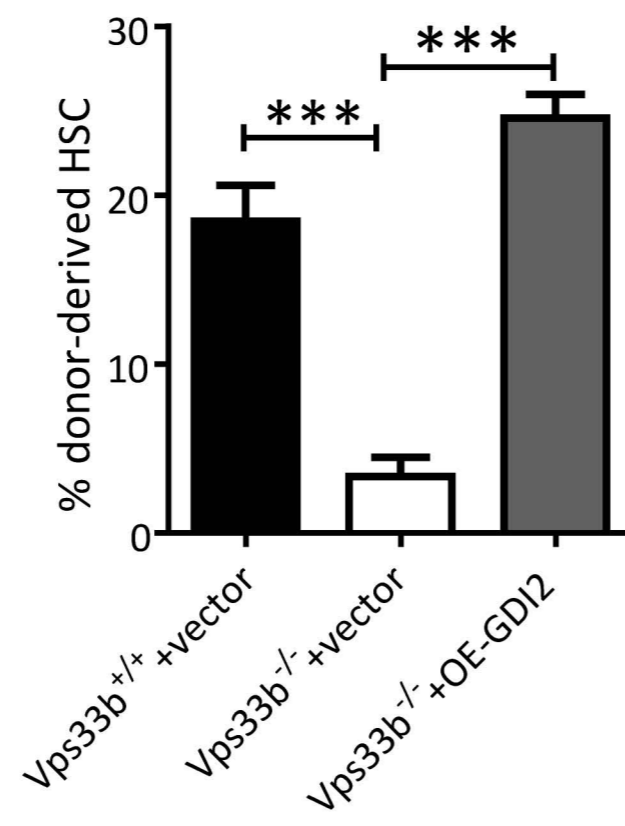**F**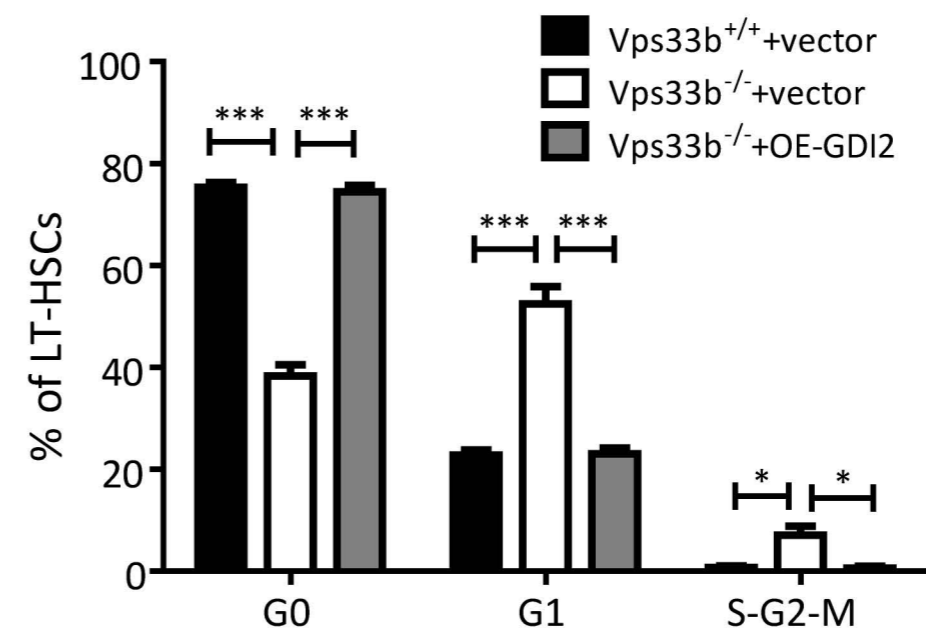**G**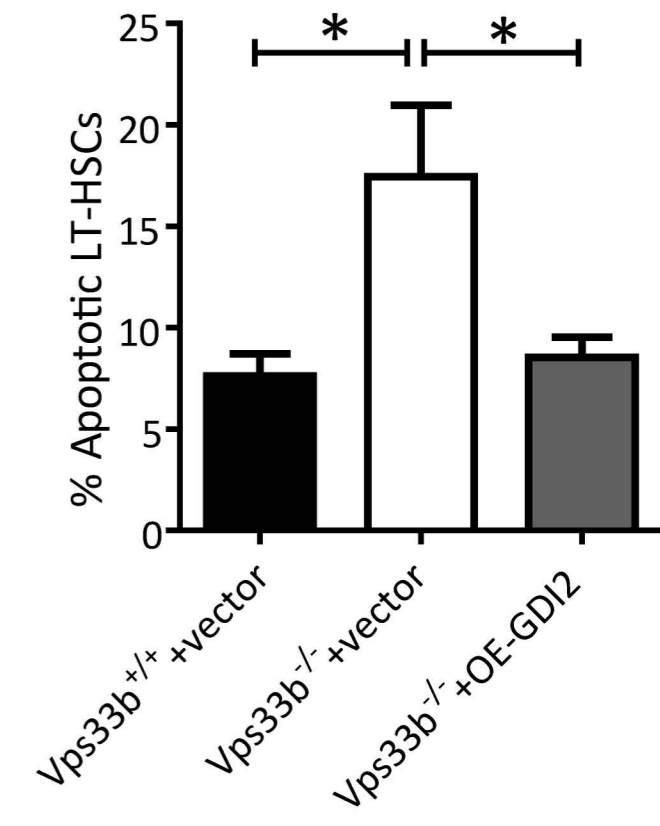



**Figure S6. Overexpression of GDI2 restores the impaired activities of VPS33B-null HSCs.** A) Knockdown efficiency of GDI2 by shRNA in 32D cells was determined by immunoblot analysis compared with scramble shRNA. shRNA-GDI2-2 was used for the subsequent experiments. 32D cell line was purchased from ATCC. B) Cell numbers were counted at the indicated days after infection with either GDI2-targeted shRNA or scrambled shRNA in 32D cells (n=3, *t* test \*\*p<0.01, \*\*\*p<0.001). C) Apoptosis was measured in the control and GDI2-knockdown 32D cells using Annexin V/7-AAD staining (n=3, *t* test; \*\*\*p<0.001). D) Multilineage contribution of donor cells in the recipients at 16 weeks post-transplantation (n=5, *t* test; \*\*\*p<0.001). E-G) HSC frequencies, cell cycle status and apoptosis were compared among the recipient mice receiving WT, VPS33B-null and GDI2-overexpressing VPS33B-null HSCs (n=5, *t* test; \*p<0.05, \*\*\*p<0.001). Experiments were conducted 3 times for validation.

**Figure S7****A**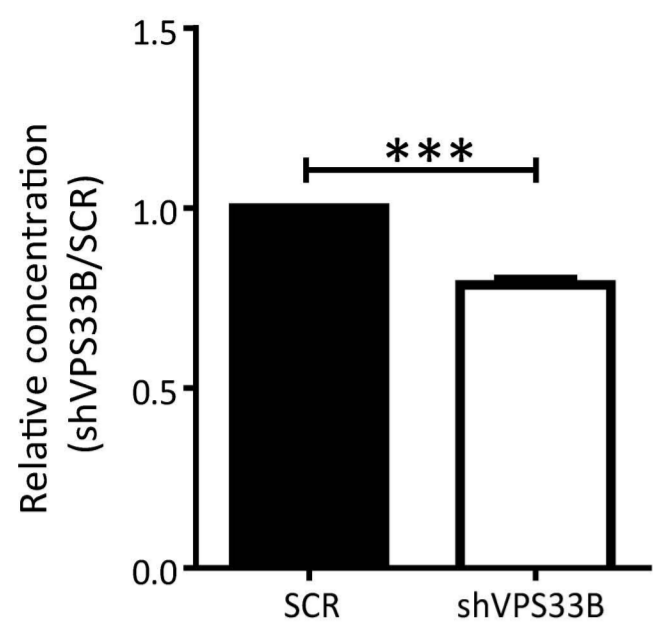**B**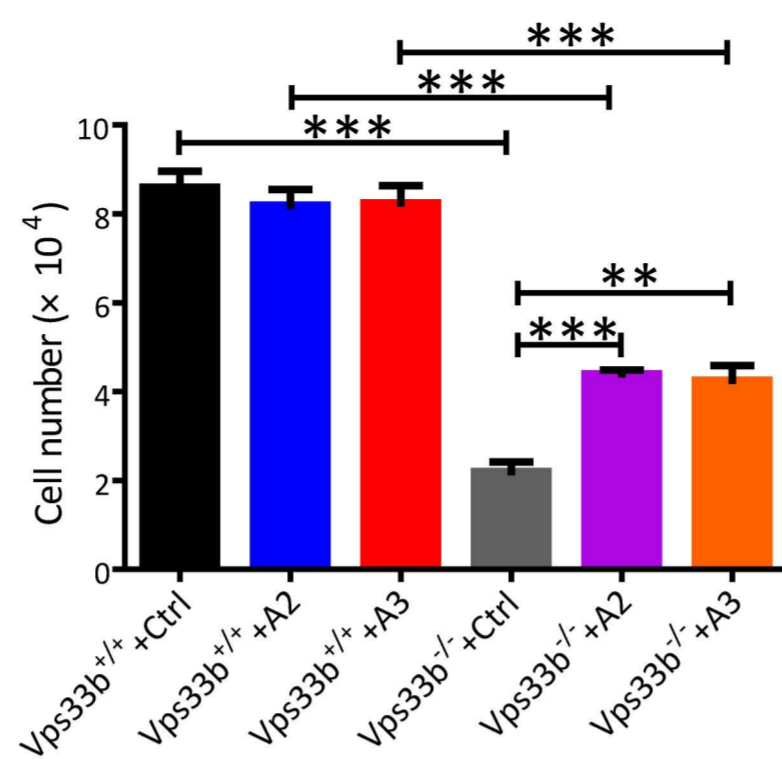**C**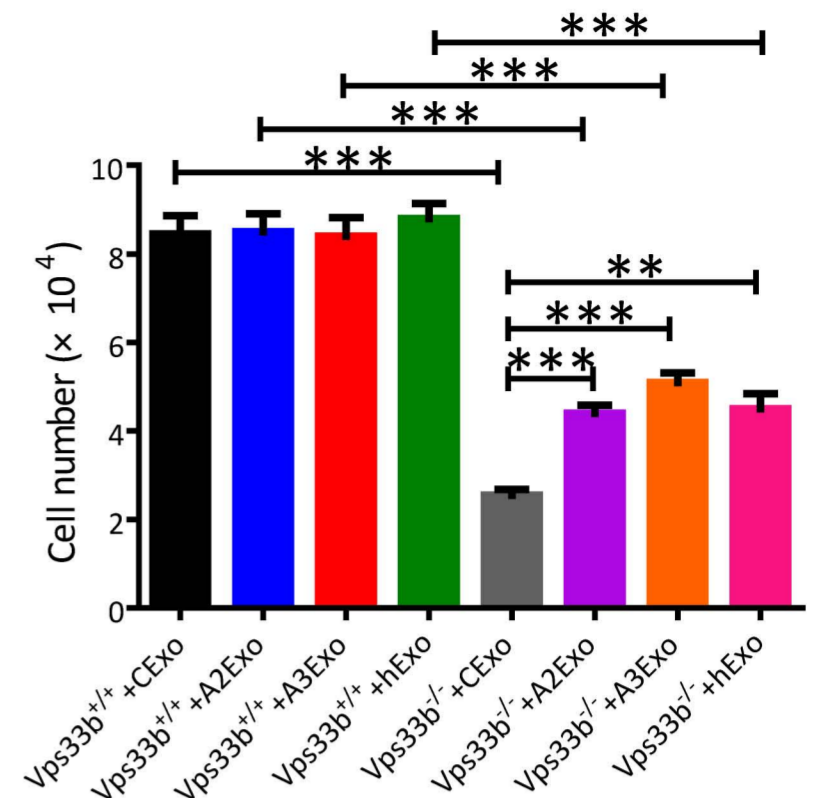**D**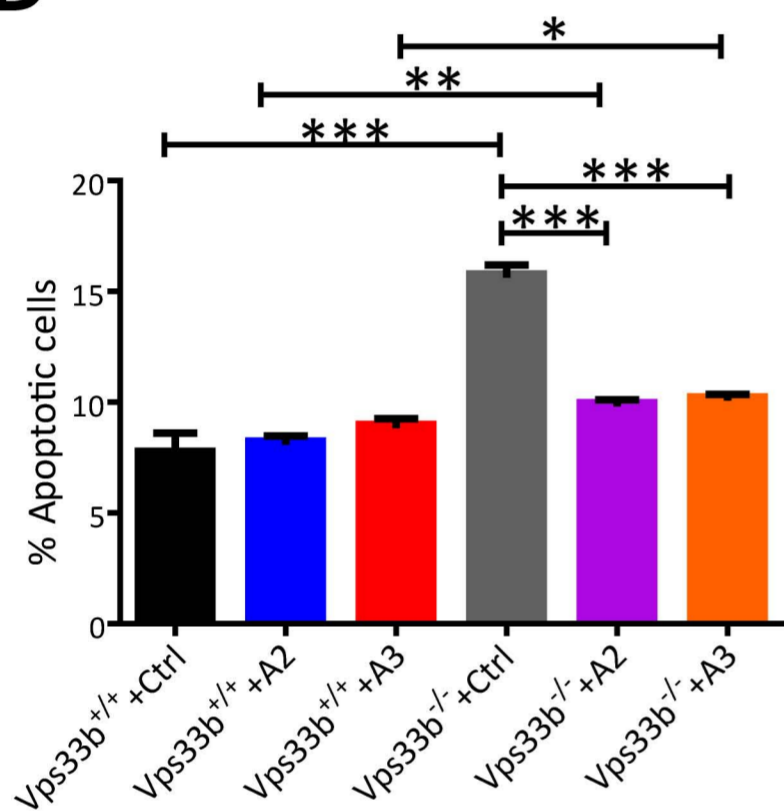**E**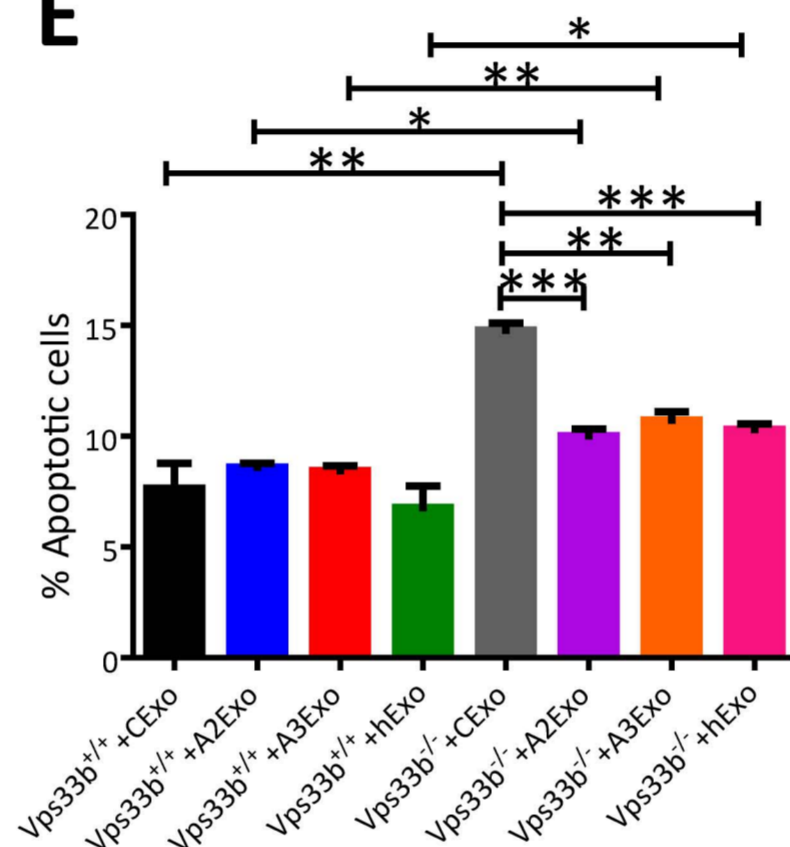**F**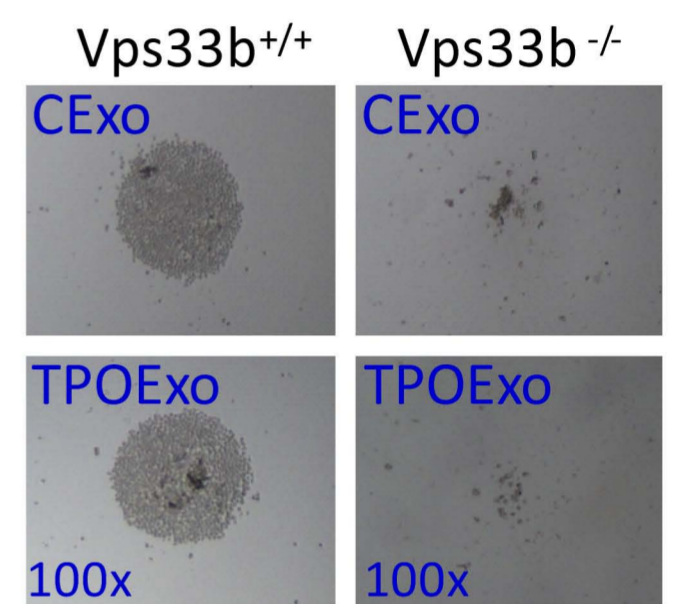**G**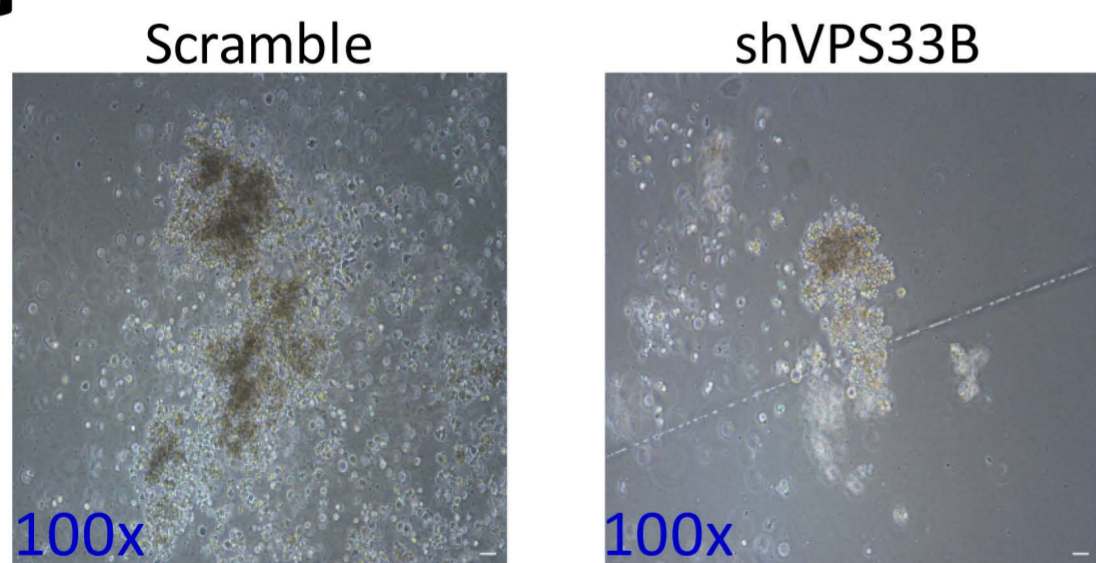**J**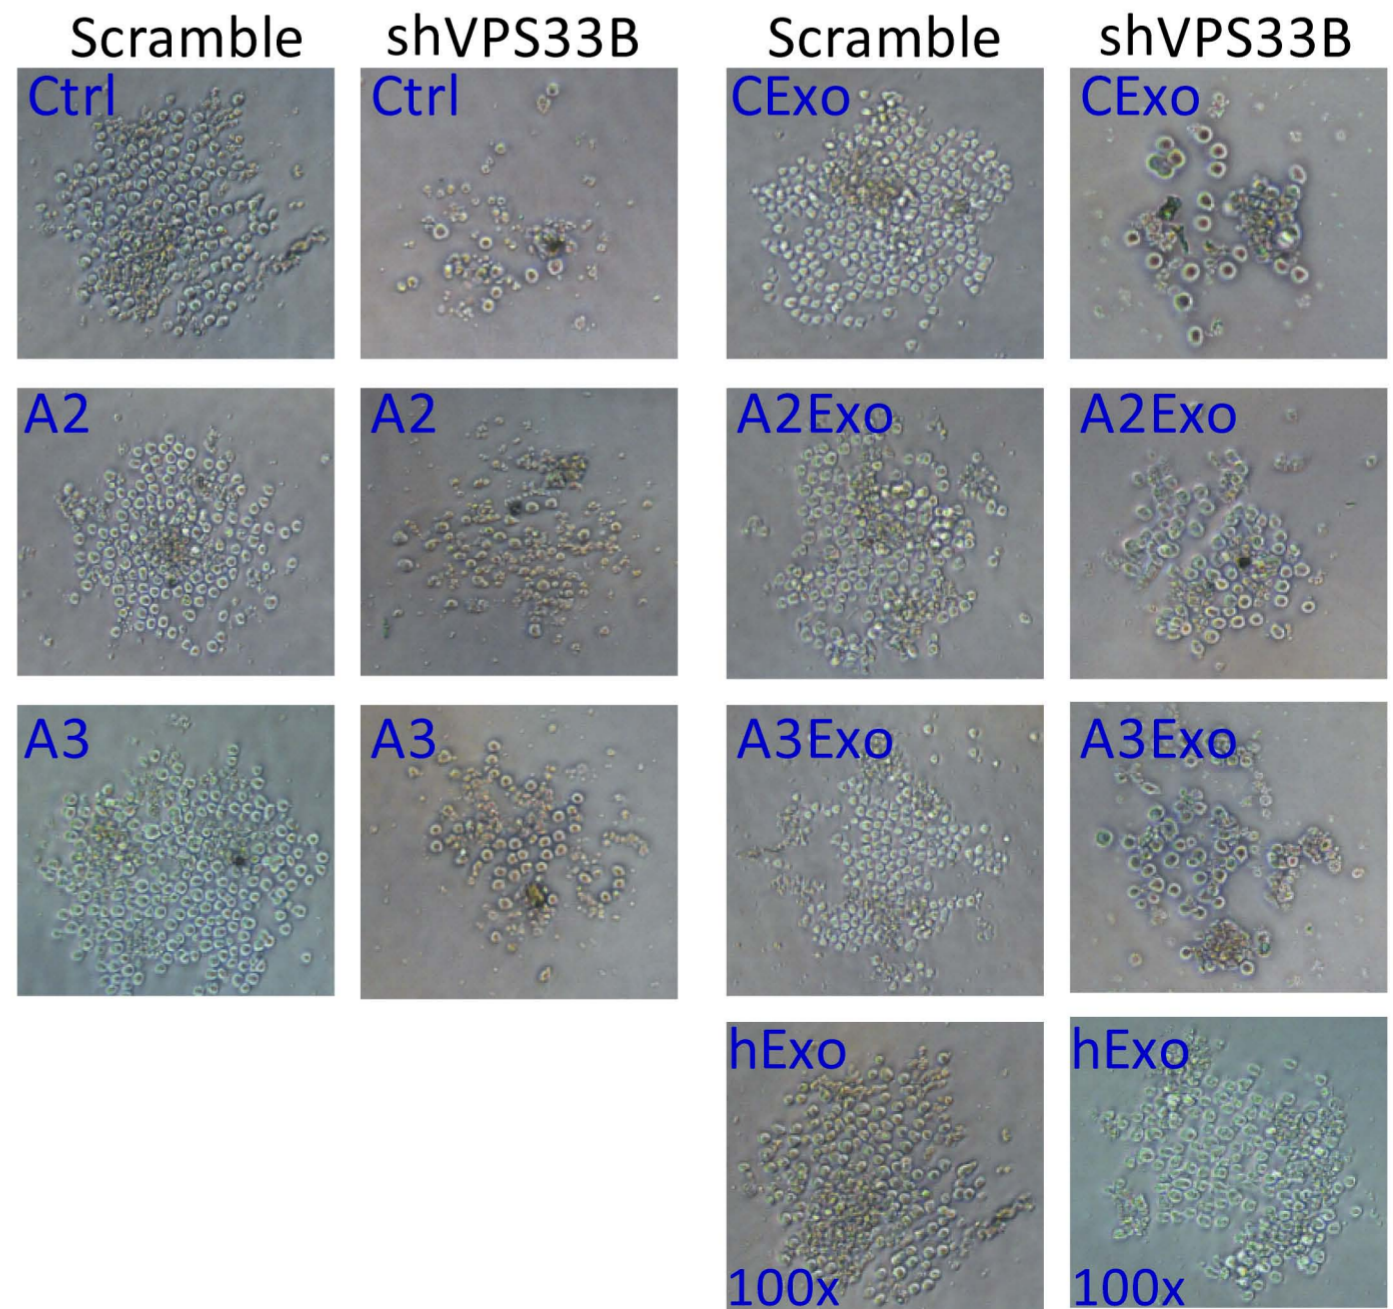**H**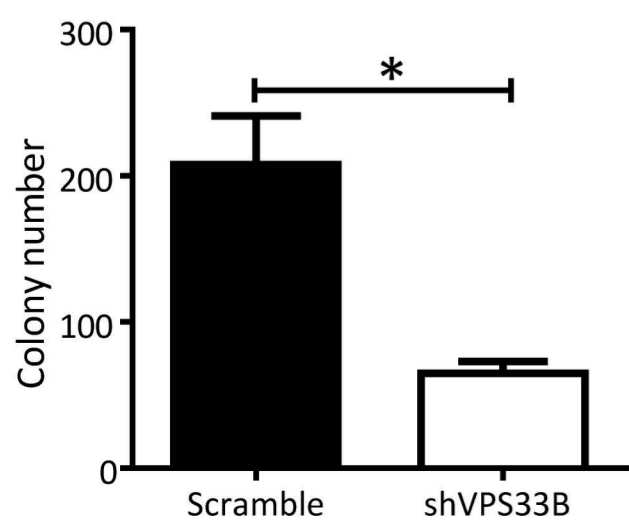**I**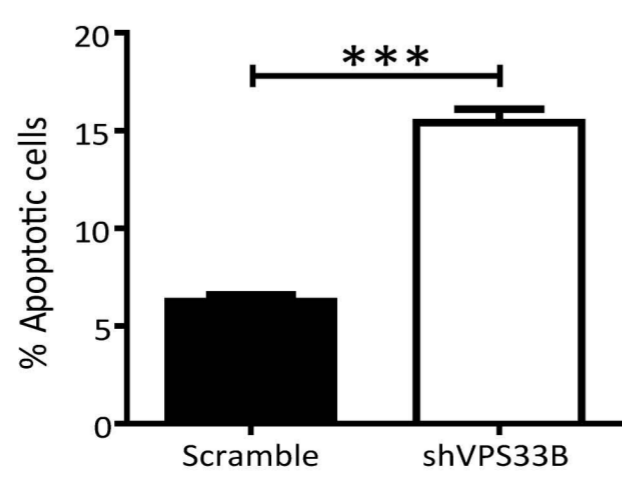

**Figure S7. VPS33B regulates the release of growth factor-containing exosomes to maintain mouse HSC functions.** A) VPS33B-knockdown HSCs from human cord blood were cultured in vitro for 7 days, and the exosomes in the supernatant were evaluated by NanoSight. Cells treated with scramble shRNA was a negative control (n=3, *t* test; \*\*\*p<0.001). B-E) Cell numbers and apoptosis were analyzed in cultured WT and VPS33B-null HSCs with or without ANGPTL2- and ANGPTL3-conditioned medium (Ctrl, A2, and A3) or purified exosomes (CExo, A2Exo, A3Exo, and hExo) for 6 days (n=5, *t* test; \*p<0.05, \*\*p<0.01, \*\*\*p<0.001). F) Representative images of LT-HSCs from VPS33B<sup>+/+</sup> and VPS33B<sup>-/-</sup> mice cultured in basic medium (SCF) or with purified control or TPO-containing exosomes (CExo and TPOExo, respectively) for 6 days (n=3). G) Representative images for CFU of CD34<sup>+</sup> HSCs from human cord blood upon VPS33B knockdown. H-I) Colony numbers and apoptotic status were evaluated in cultured human CD34<sup>+</sup> HSCs upon VPS33B knockdown (n=3, *t* test; \*p<0.05, \*\*\*p<0.001). J) Representative images of human CD34<sup>+</sup> HSCs infected with either VPS33B-targeted shRNA or scrambled shRNA and cultured in basic medium (SCF+TPO), ANGPTL2- and ANGPTL3-conditioned medium (Ctrl, A2, and A3) or their purified exosomes (CExo, A2Exo, and A3Exo), as well as human plasma-derived exosomes (hExo) for 6 days (n=3). Experiments were conducted 3 times for validation.

**Figure S8**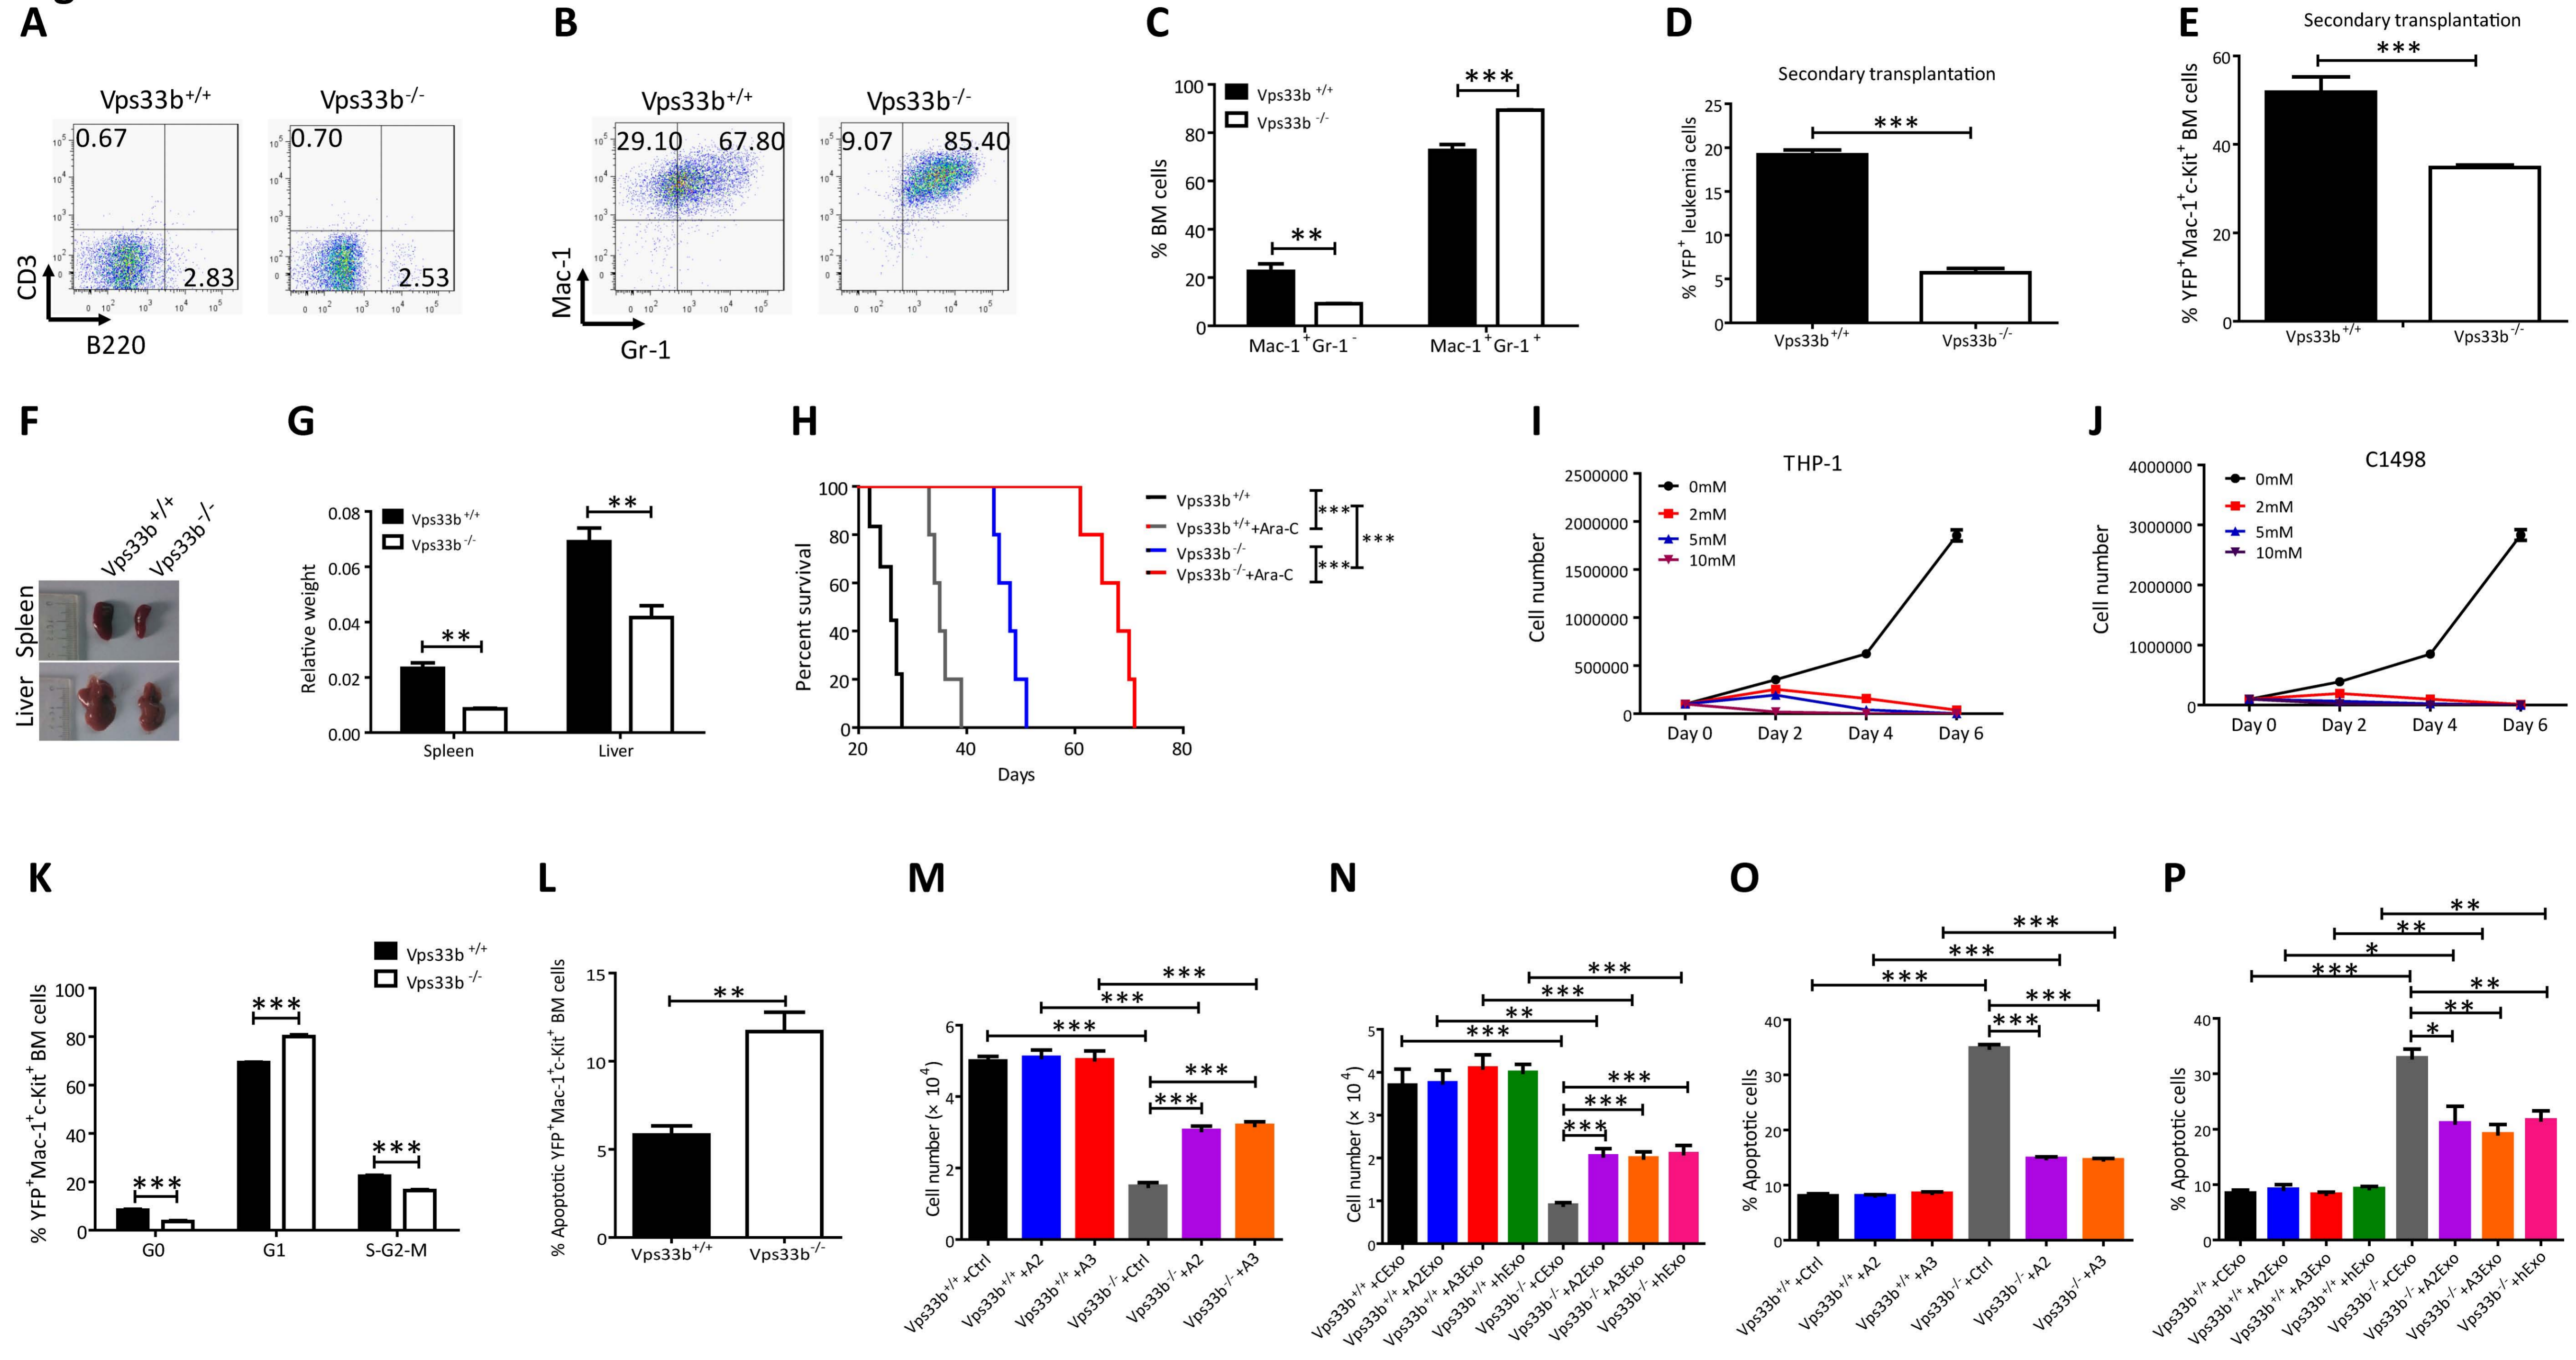

**Figure S8. VPS33B supports leukemia development.** A-C) Lineage analysis with lymphoid cell markers (CD3/B220, A) and myeloid cell markers (Mac-1/Gr-1, B) were conducted in WT and VPS33B-null leukemia cells. The percentages of Mac-1<sup>+</sup> Gr-1<sup>-</sup> and Mac-1<sup>+</sup> Gr-1<sup>+</sup> cells is shown (n=5, *t* test; \*\*p<0.01, \*\*\*p<0.001, C). D) Frequency of YFP<sup>+</sup> leukemia cells in the peripheral blood of the recipients receiving control and VPS33B-null leukemia cells from primary leukemia cells 4 weeks after transplantation (n=6, *t* test; \*\*\*p<0.001). E) Frequency of Mac-1<sup>+</sup>c-Kit<sup>+</sup> LICs in the bone marrow of secondary recipient mice is shown (n=6, *t* test; \*\*\*p<0.001). F-G) Comparison of the sizes of spleens and livers from mice transplanted with either WT or VPS33B-null leukemia cells upon secondary transplantation (n=6, *t* test; \*\*p<0.01). H) WT and VPS33B-null leukemia mice were treated with 50mg/kg cytarabine for once, and the overall survival in the following groups were evaluated: VPS33B<sup>+/+</sup>, VPS33B<sup>-/-</sup>, VPS33B<sup>+/+</sup> + cytarabine and VPS33B<sup>-/-</sup> + cytarabine (n=5, log-rank test; \*\*\*p<0.001). I-J) The human and mouse AML cell lines THP1 and C1498, respectively, were treated with a general vesicle inhibitor (3-MA). Cell number was calculated at the indicated time points (n=3). These cell lines were purchased from ATCC. K-L) Mac-1<sup>+</sup>c-Kit<sup>+</sup> WT and VPS33B-null LICs were analyzed for cell cycle and apoptotic status by the staining with Pyronin Y/Hoechst 33342 and Annexin V/7-AAD, respectively (n=6, *t* test; \*\*p<0.01, \*\*\*p<0.001). M-P) Cell numbers (M-N) or apoptosis (O-P) was analyzed in cultured WT and VPS33B-null LICs with or without ANGPTL2- and ANGPTL3-conditioned medium (Ctrl, A2, and A3) or purified exosomes (CExo, A2Exo, A3Exo, and hExo) for 6 days (n=5, *t* test; \*p<0.05, \*\*p<0.01, \*\*\*p<0.001). Experiments were conducted 3 times for validation.

**Figure S9**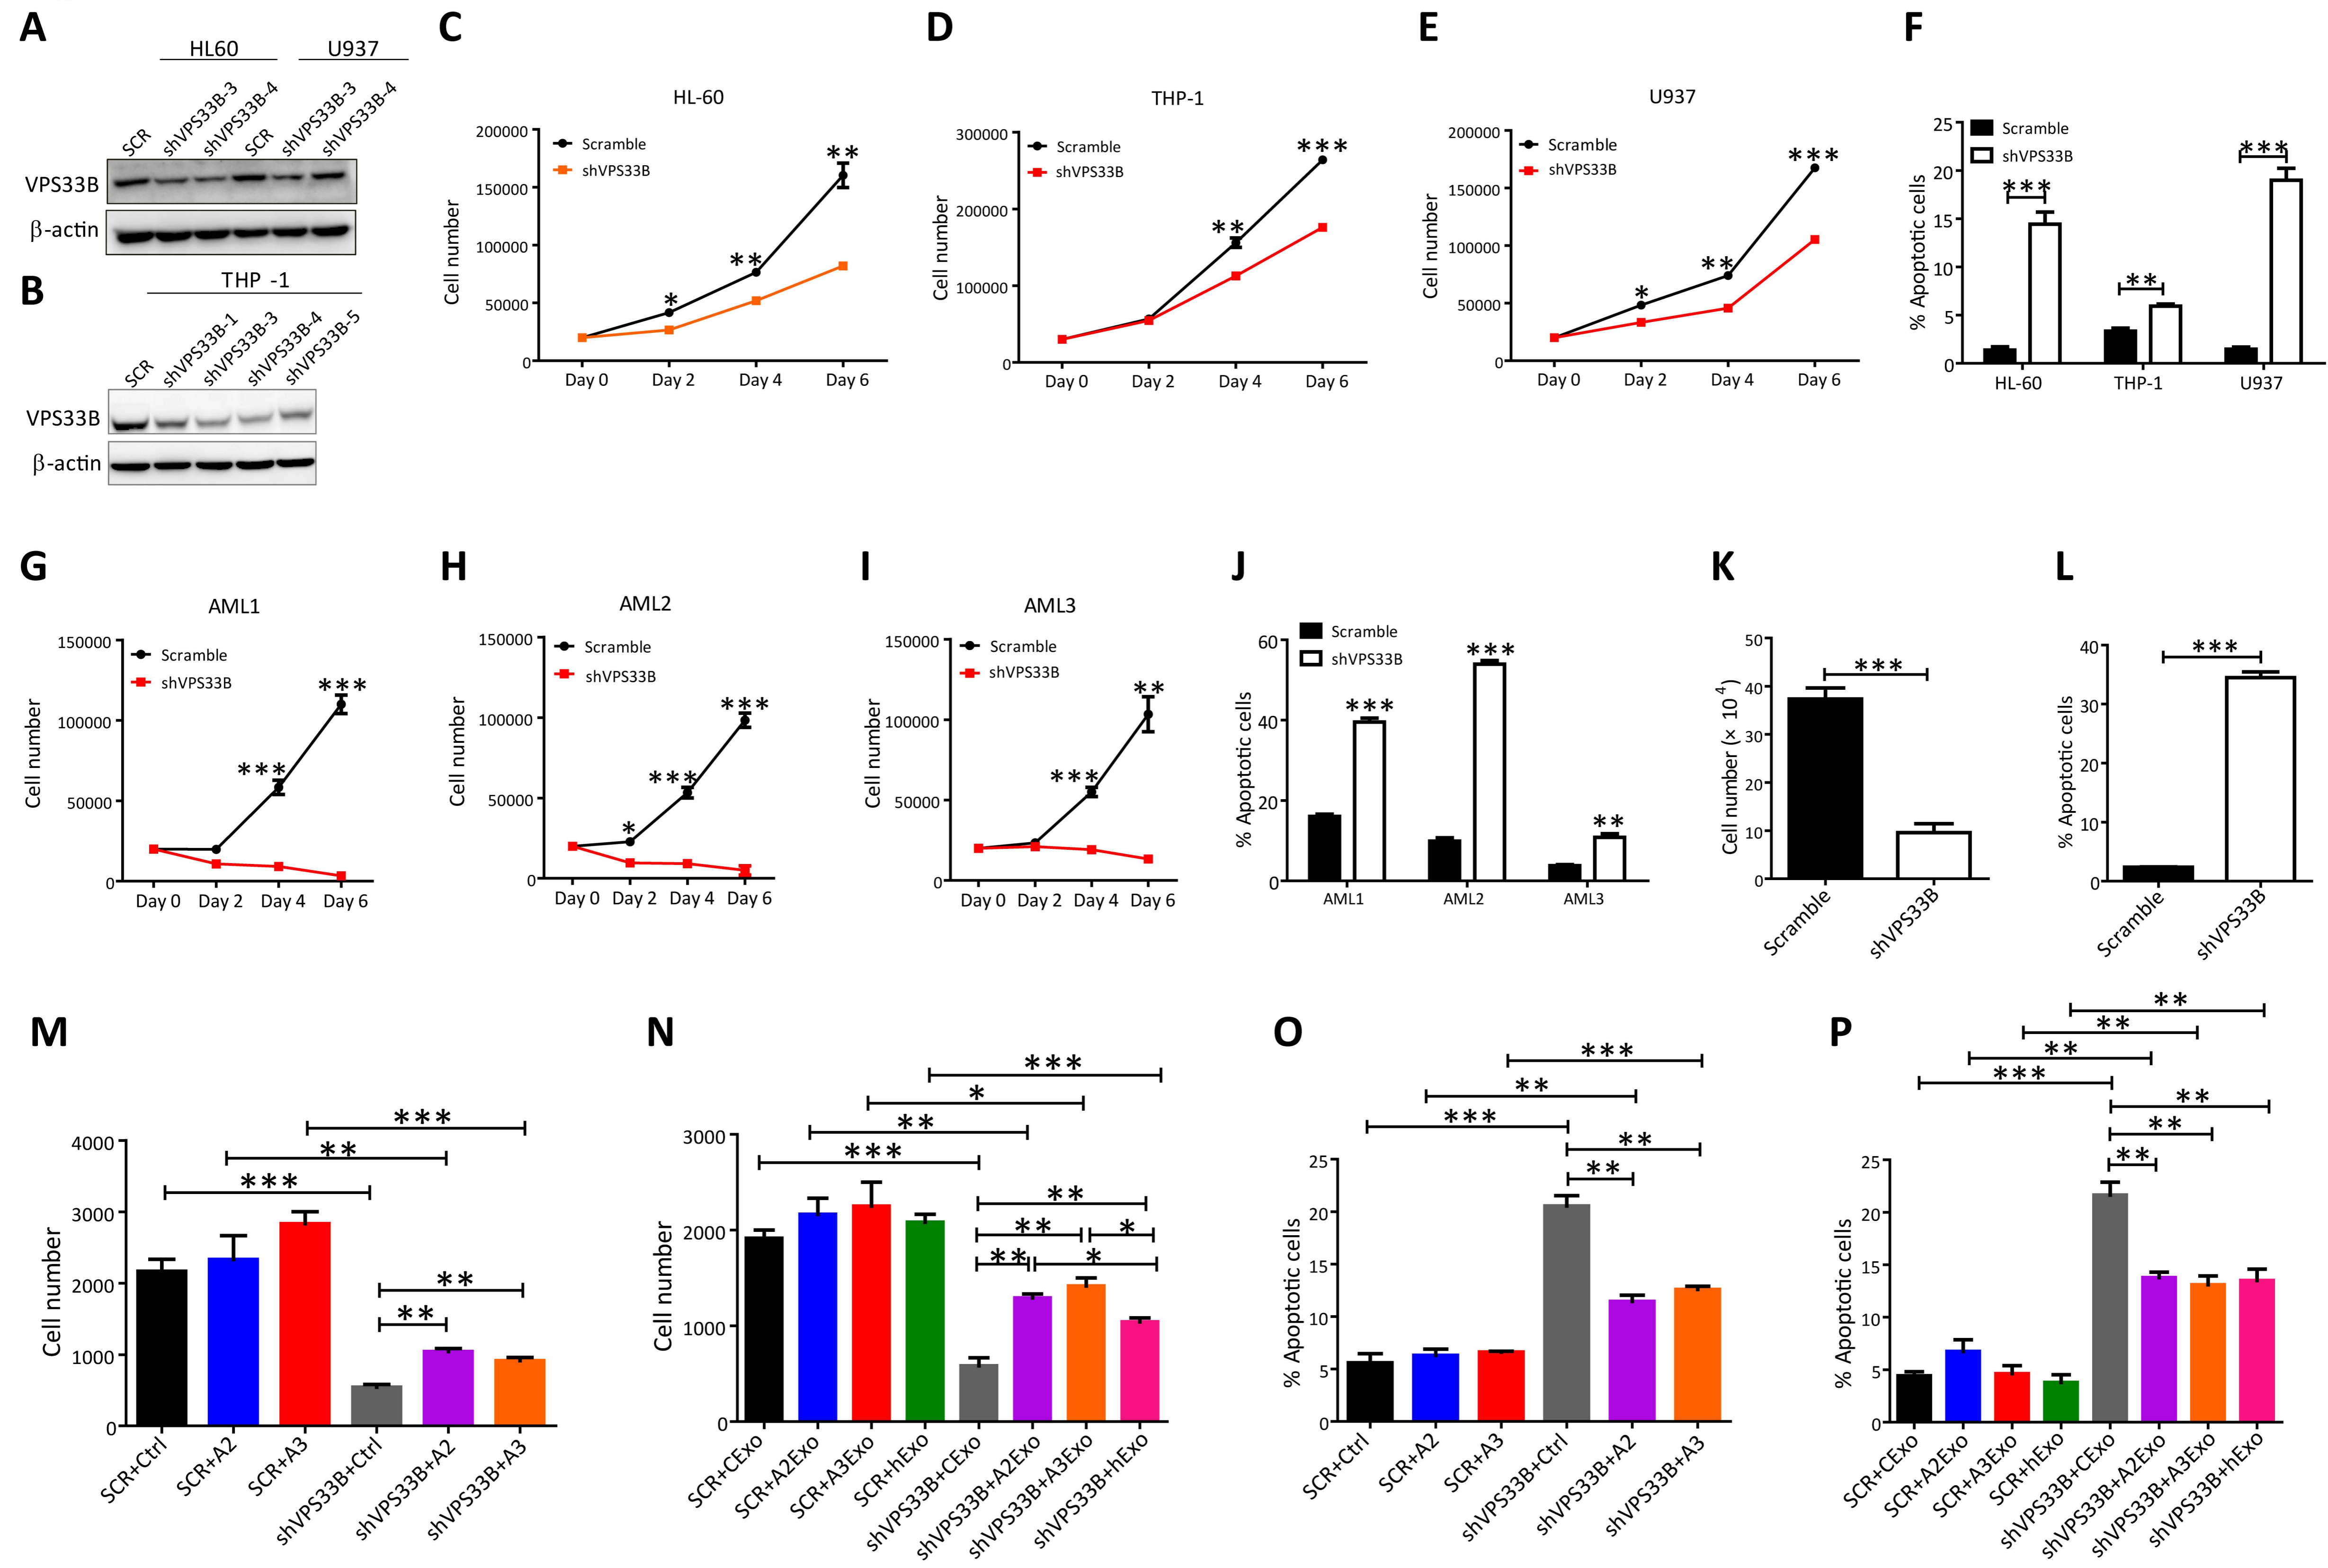

**Figure S9. VPS33B supports leukemia development.** A-B) Knockdown efficiencies of VPS33B in HL-60, U937 and THP-1 cells were determined by immunoblot analysis. C-E) Cell numbers were counted at indicated days after infection with VPS33B-targeted shRNA or scrambled shRNA in human leukemia cell lines including HL-60, THP-1 and U937 (n=3, *t* test; \**p*<0.05, \*\**p*<0.01, \*\*\**p*<0.001). These cell lines were purchased from ATCC. F) Apoptosis in different AML cell lines was examined upon VPS33B knockdown (n=3, *t* test; \*\**p*<0.01, \*\*\**p*<0.001). G-J) Total cell numbers and apoptosis were quantified in human primary AML samples at the indicated days upon VPS33B knockdown (n=3, *t* test; \**p*<0.05, \*\**p*<0.01, \*\*\**p*<0.001). K) Cell numbers were calculated in colonies from human AML samples upon VPS33B knockdown (n=3, *t* test; \*\*\**p*<0.001). L) Apoptosis were measured in human CD34<sup>+</sup> LICs in colonies after VPS33B knockdown (n=3, *t* test; \*\*\**p*<0.001).M-P) Cell numbers (M-N) or apoptotic status (O-P) was analyzed in the control and VPS33B-knockdown human LICs cultured with or without ANGPTL2- and ANGPTL3-conditioned medium (Ctrl, A2, and A3) or purified exosomes (CExo, A2Exo, A3Exo, and hExo) (n=5, *t* test; \*\**p*<0.01, \*\*\**p*<0.001). Experiments were conducted 3 times for validation.

**Table S1. Primer Sequences**

| <b>Genotyping primers</b>     | <b>Sequence</b>          |
|-------------------------------|--------------------------|
| Vps33b-cko-A1                 | CTGACTAGGGGAGGAGTAGAAGGT |
| Vps33b-cko-A2                 | GTATCACTGAGTCACACACATCCA |
| Vps33b-cko-A3                 | ATAGAGACGTTAGCAATTCGATCC |
| Scl-cre-ER-F                  | GAACCTGAAGATGTTTCGCGAT   |
| Scl-cre-ER-R                  | ACCGTCAGTACGTGAGATATC    |
| Vps33b-deletion-detection-F   | GCCACTCCCCTGTCCTTT       |
| Vps33b-deletion-detection-R   | TGCACAGGAAGTGCTTCAAC     |
| <b>shRNA for human VPS33B</b> | <b>Target sequence</b>   |
| shRNA-1                       | CGGAGAGGCATGGACATTA      |
| shRNA-2                       | CTGTTTGAATGTCATTGTA      |
| shRNA-3                       | CCGAGGACAAGGTGTTTAA      |
| shRNA-4                       | AACACGAAGTAGACAAGCT      |
| shRNA-5                       | GCCTGTGAATCCATCATGA      |
| <b>shRNA for human GDI2</b>   | <b>Target sequence</b>   |
| shRNA-1                       | AGATCAACCGTGTTATGAA      |
| <b>shRNA for mouse GDI2</b>   | <b>Target sequence</b>   |
| shRNA-1                       | GCCGCCATGAATGAGGAATA     |
| shRNA-2                       | AGGGTAGCCAAACTTCAGA      |
| <b>qRT-PCR primers</b>        | <b>Sequence</b>          |
| mouse-vps33b-F                | AGCTTCCCGACTTCTCTATGC    |
| mouse-vps33b-R                | CAATTCGATCCAAAGGGCTCAT   |
| mouse-gdi2-F                  | AAAAGCCCGTACCTGTATCCG    |
| mouse-gdi2-R                  | ACAGATCACTCTGATTACCTGGC  |
| mouse-bcl2-F                  | GATCCAGGATAACGGAGGCT     |
| mouse-bcl2-R                  | GGTCTTCAGAGACAGCCAGG     |
| mouse-bcl2-l-2-F              | AGTCCTCTAGGCCCACTTC      |
| mouse-bcl2-l-2-R              | ACTTCAGTTGCTCCTGCACC     |
| mouse-p53-F                   | GCGTAAACGCTTCGAGATGTT    |
| mouse-p53-R                   | TTTTTATGGCGGGAAGTAGACTG  |
| mouse-p21-F                   | CGGTGTCAGAGTCTAGGGGA     |
| mouse-p21-R                   | ATCACCAGGATTGGACATGG     |
| mouse-bad-F                   | GAGCAACATTCATCAGCAGG     |



---

|                  |                       |
|------------------|-----------------------|
| mouse-bad-R      | CTCCTCCTCCATCCCTTCAT  |
| mouse-puma-F     | AGCAGCACTTAGAGTCGCC   |
| mouse-puma-R     | CCTGGGTAAGGGGAGGAGT   |
| mouse-noxa-F     | GCAGAGCTACCACCTGAGTTC |
| mouse-noxa-R     | CTTTTGCGACTTCCCAGGCA  |
| mouse-ANGPTL2-F  | CCACCTCGGGTCTACCAAC   |
| mouse- ANGPTL2-R | CTTGCAGGCAGTCTCTCCAT  |
| mouse- ANGPTL3-F | ACAGAGCAAAGGGACAGCTC  |
| mouse- ANGPTL3-R | TGGAGCATCATTTTGGATGA  |
| mouse-TPO-F      | TCCCAGGAATTTGTCTCAGG  |
| mouse-TPO-R      | GATCGCTAGCTGCTCTGATG  |
| human-VPS33B-F   | TCGCCTATAGAAAGCCTGCG  |
| human-VPS33B-R   | GGCCAGAGAACTGAAGGCAT  |

---

**Table S2. Data on mass spectrometry proteomics**

| Sample name | Group name | Protein name                                                                                                                                                                                                                                                                                                                                                                                                                                      |
|-------------|------------|---------------------------------------------------------------------------------------------------------------------------------------------------------------------------------------------------------------------------------------------------------------------------------------------------------------------------------------------------------------------------------------------------------------------------------------------------|
| Band1       | 1(VPS33B)  | IPI:IPI00032905.3 SWISS-PROT:Q9H267 TREMBL:B7Z1N4;B7Z6M7 ENSEMBL:ENSP00000327650 REFSEQ:NP_061138 H-INV:HIT000076960 VEGA:OTTHUMP00000194751<br>Tax_Id=9606 Gene_Symbol=VPS33B Vacuolar protein sorting-associated protein 33B                                                                                                                                                                                                                    |
|             | 2          | IPI:IPI01019113.1 SWISS-PROT:P07437 TREMBL:Q5SU16;Q6LC01 ENSEMBL:ENSP00000339001;ENSP00000373058;ENSP00000399155;ENSP00000400663;ENSP00000401317;ENSP00000406811;ENSP00000410071;ENSP00000410829 REFSEQ:NP_821133 H-INV:HIT000038721 VEGA:OTTHUMP00000014646;OTTHUMP00000029069;OTTHUMP00000029477;OTTHUMP00000165122;OTTHUMP00000192963;OTTHUMP00000193218;OTTHUMP00000193677;OTTHUMP00000194048 Tax_Id=9606 Gene_Symbol=TUBB Tubulin beta chain |
|             | 3          | IPI:IPI00440493.2 SWISS-PROT:P25705 ENSEMBL:ENSP00000282050;ENSP00000381736 REFSEQ:NP_001001937;NP_004037 H-INV:HIT000049010 VEGA:OTTHUMP00000163475 Tax_Id=9606 Gene_Symbol=ATP5A1 ATP synthase subunit alpha, mitochondrial                                                                                                                                                                                                                     |
|             | 4          | IPI:IPI00007752.1 SWISS-PROT:P68371 TREMBL:Q8IWP6;Q8IZ29;Q8N6N5;Q96HX0 ENSEMBL:ENSP00000341289 REFSEQ:NP_006079 H-INV:HIT000009868 VEGA:OTTHUMP00000162590 Tax_Id=9606 Gene_Symbol=TUBB2C Tubulin beta-2C chain                                                                                                                                                                                                                                   |
|             | 5          | IPI:IPI00023598.2 SWISS-PROT:P04350 TREMBL:B4DE77 ENSEMBL:ENSP00000264071;ENSP00000443590 REFSEQ:NP_006078 H-INV:HIT000036323 Tax_Id=9606 Gene_Symbol=TUBB4 Tubulin beta-4 chain                                                                                                                                                                                                                                                                  |
|             | 6          | IPI:IPI00003918.6 SWISS-PROT:P36578 TREMBL:B4DFI6;Q53G74;Q59GY2 ENSEMBL:ENSP00000311430 REFSEQ:NP_000959 H-INV:HIT000304287 VEGA:OTTHUMP00000164249 Tax_Id=9606 Gene_Symbol=RPL4 60S ribosomal protein L4                                                                                                                                                                                                                                         |
|             | 7          | IPI:IPI00013475.1 SWISS-PROT:Q13885 TREMBL:A5D906;A5D907 ENSEMBL:ENSP00000369703 REFSEQ:NP_001060 H-INV:HIT000289258 VEGA:OTTHUMP00000015956 Tax_Id=9606 Gene_Symbol=TUBB2A Tubulin beta-2A chain                                                                                                                                                                                                                                                 |
|             | 8          | IPI:IPI00930688.1 SWISS-PROT:P68363 TREMBL:A8JZY9;B3KPS3;B3KT06 ENSEMBL:ENSP00000336799 REFSEQ:NP_006073 H-INV:HIT000291174 Tax_Id=9606 Gene_Symbol=TUBA1B Tubulin alpha-1B chain                                                                                                                                                                                                                                                                 |
|             | 9          | IPI:IPI00303476.1 SWISS-PROT:P06576 TREMBL:Q0QEN7 ENSEMBL:ENSP00000262030 REFSEQ:NP_001677 H-INV:HIT000279396 Tax_Id=9606 Gene_Symbol=ATP5B ATP synthase subunit beta, mitochondrial                                                                                                                                                                                                                                                              |
|             | 10         | IPI:IPI00180675.4 SWISS-PROT:Q71U36 ENSEMBL:ENSP00000301071;ENSP00000439020 REFSEQ:NP_006000 H-INV:HIT000272358 Tax_Id=9606 Gene_Symbol=TUBA1A Tubulin alpha-1A chain                                                                                                                                                                                                                                                                             |
|             | 11         | IPI:IPI00218343.4 SWISS-PROT:Q9BQE3 ENSEMBL:ENSP00000301072 REFSEQ:NP_116093 H-INV:HIT000279007 Tax_Id=9606 Gene_Symbol=TUBA1C Tubulin alpha-1C chain                                                                                                                                                                                                                                                                                             |
|             | 12         | IPI:IPI00216951.2 SWISS-PROT:P14868 TREMBL:D3DP78;Q53R85 ENSEMBL:ENSP00000264161 REFSEQ:NP_001340 H-INV:HIT000048792 VEGA:OTTHUMP00000162534 Tax_Id=9606 Gene_Symbol=DARS Aspartyl-tRNA synthetase, cytoplasmic                                                                                                                                                                                                                                   |
|             | 13         | IPI:IPI00418471.6 SWISS-PROT:P08670 TREMBL:Q53HU8 ENSEMBL:ENSP00000224237;ENSP00000446007 REFSEQ:NP_003371 H-INV:HIT000262376 VEGA:OTTHUMP00000019224 Tax_Id=9606 Gene_Symbol=VIM Vimentin                                                                                                                                                                                                                                                        |
|             | 14         | IPI:IPI00009104.7 SWISS-PROT:Q9Y230 TREMBL:B3KNL2 ENSEMBL:ENSP00000221413 REFSEQ:NP_006657 H-INV:HIT000292648 Tax_Id=9606 Gene_Symbol=RUVBL2 RuvB-like 2                                                                                                                                                                                                                                                                                          |
|             | 15         | IPI:IPI00013683.2 SWISS-PROT:Q13509 ENSEMBL:ENSP00000320295;ENSP00000452381 REFSEQ:NP_006077 H-INV:HIT000277220 VEGA:OTTHUMP00000176846 Tax_Id=9606 Gene_Symbol=TUBB3;MC1R Tubulin beta-3 chain                                                                                                                                                                                                                                                   |
|             | 16         | IPI:IPI00908469.1 TREMBL:B4DP54 ENSEMBL:ENSP00000389084 Tax_Id=9606 Gene_Symbol=TUBB6 cDNA FLJ52712, highly similar to Tubulin beta-6 chain                                                                                                                                                                                                                                                                                                       |
|             | 17         | IPI:IPI00646779.2 SWISS-PROT:Q9BUF5 TREMBL:Q2NKY5 ENSEMBL:ENSP00000318697 REFSEQ:NP_115914 H-INV:HIT000295563 VEGA:OTTHUMP00000162473 Tax_Id=9606 Gene_Symbol=TUBB6 TUBB6 protein                                                                                                                                                                                                                                                                 |
|             | 18         | IPI:IPI01011853.1 TREMBL:B3KS31;B4E386 ENSEMBL:ENSP00000437929 Tax_Id=9606 Gene_Symbol=TUBB6 cDNA FLJ35358 fis, clone PUAEN2000497, highly similar to Tubulin beta-6 chain                                                                                                                                                                                                                                                                        |
|             | 19         | IPI:IPI00031812.3 SWISS-PROT:P67809 TREMBL:A0JLU4;Q05D43;Q6PKI6 ENSEMBL:ENSP00000361626 REFSEQ:NP_004550 H-INV:HIT000305396 VEGA:OTTHUMP00000008731 Tax_Id=9606 Gene_Symbol=YBX1 Nuclease-sensitive element-binding protein 1                                                                                                                                                                                                                     |

|  |            |                                                                                                                                                                                                                                                                                                                        |
|--|------------|------------------------------------------------------------------------------------------------------------------------------------------------------------------------------------------------------------------------------------------------------------------------------------------------------------------------|
|  | 20         | IPI: IPI00472724.1 SWISS-PROT: Q5VTE0 H-INV: HIT000294489 Tax_Id=9606 Gene_Symbol=EEF1A1P5:EEF1A1 Putative elongation factor 1-alpha-like 3                                                                                                                                                                            |
|  | 21         | IPI: IPI00000875.7 TREMBL: B4DTG2 ENSEMBL: ENSP00000367258 Tax_Id=9606 Gene_Symbol=EEF1G cDNA FLJ56389, highly similar to Elongation factor 1-gamma                                                                                                                                                                    |
|  | 22         | IPI: IPI00022256.3 SWISS-PROT: Q96CW1-1 TREMBL: B4DFM1 ENSEMBL: ENSP00000292807 REFSEQ: NP_004059 H-INV: HIT000014490 VEGA: OTTHUMP00000210696 Tax_Id=9606 Gene_Symbol=AP2M1 Isoform 1 of AP-2 complex subunit mu                                                                                                      |
|  | 23         | IPI: IPI00792478.1 TREMBL: B3KPW9 ENSEMBL: ENSP00000318575 REFSEQ: NP_001180343 VEGA: OTTHUMP00000196217 Tax_Id=9606 Gene_Symbol=TUBA8 tubulin alpha-8 chain isoform 2                                                                                                                                                 |
|  | 24         | IPI: IPI00009328.4 SWISS-PROT: P38919 ENSEMBL: ENSP00000269349 REFSEQ: NP_055555 H-INV: HIT000281989 Tax_Id=9606 Gene_Symbol=EIF4A3 Eukaryotic initiation factor 4A-III                                                                                                                                                |
|  | 25         | IPI: IPI00018971.8 SWISS-PROT: P19474-1 ENSEMBL: ENSP00000254436 REFSEQ: NP_003132 H-INV: HIT000035080 VEGA: OTTHUMP00000230775 Tax_Id=9606 Gene_Symbol=TRIM21 Isoform 1 of E3 ubiquitin-protein ligase TRIM21                                                                                                         |
|  | 26         | IPI: IPI00297982.7 SWISS-PROT: P41091 TREMBL: A8K2Y2;B2R5N2;Q53HK3 ENSEMBL: ENSP00000253039 REFSEQ: NP_001406 H-INV: HIT000038713 VEGA: OTTHUMP00000023076 Tax_Id=9606 Gene_Symbol=EIF2S3 Eukaryotic translation initiation factor 2 subunit 3                                                                         |
|  | 27         | IPI: IPI00023972.5 SWISS-PROT: Q9H0S4 TREMBL: Q53GJ1;Q7Z4B1;Q9H4E3 ENSEMBL: ENSP00000350698 REFSEQ: NP_057439 H-INV: HIT000025262;HIT000047585 VEGA: OTTHUMP00000239227 Tax_Id=9606 Gene_Symbol=DDX47 Probable ATP-dependent RNA helicase DDX47                                                                        |
|  | 28         | IPI: IPI00014424.1 SWISS-PROT: Q05639 ENSEMBL: ENSP00000217182;ENSP00000298049 REFSEQ: NP_001949 H-INV: HIT000386552 VEGA: OTTHUMP00000031776 Tax_Id=9606 Gene_Symbol=EEF1A2 Elongation factor 1-alpha 2                                                                                                               |
|  | 29         | IPI: IPI00908896.2 TREMBL: E9PCY7 ENSEMBL: ENSP00000426275 VEGA: OTTHUMP00000223421 Tax_Id=9606 Gene_Symbol=HNRNPH1 Uncharacterized protein                                                                                                                                                                            |
|  | 30         | IPI: IPI00940237.1 SWISS-PROT: O00148 TREMBL: Q69YT6 ENSEMBL: ENSP00000242776 REFSEQ: NP_005795 H-INV: HIT000285362 Tax_Id=9606 Gene_Symbol=DDX39A ATP-dependent RNA helicase DDX39A                                                                                                                                   |
|  | 31         | IPI: IPI01025218.1 TREMBL: F8VQ10 ENSEMBL: ENSP00000412582;ENSP00000448893;ENSP00000449046;ENSP00000449135;ENSP00000449305;ENSP00000449488;ENSP00000450155 Tax_Id=9606 Gene_Symbol=SNORD84;DDX39B Uncharacterized protein                                                                                              |
|  | 32         | IPI: IPI00021187.4 SWISS-PROT: Q9Y265-1 TREMBL: B5BUB1 ENSEMBL: ENSP00000318297 REFSEQ: NP_003698 H-INV: HIT000326082 VEGA: OTTHUMP00000216127 Tax_Id=9606 Gene_Symbol=RUVBL1 Isoform 1 of RuvB-like 1                                                                                                                 |
|  | 33         | IPI: IPI00465248.5 SWISS-PROT: P06733-1 TREMBL: A4UCS8 ENSEMBL: ENSP00000234590 REFSEQ: NP_001419 H-INV: HIT000270987 VEGA: OTTHUMP00000001706 Tax_Id=9606 Gene_Symbol=ENO1 Isoform alpha-enolase of Alpha-enolase                                                                                                     |
|  | 34         | IPI: IPI00299571.5 SWISS-PROT: Q15084-2 ENSEMBL: ENSP00000385385 VEGA: OTTHUMP00000200409 Tax_Id=9606 Gene_Symbol=PDIA6 Isoform 2 of Protein disulfide-isomerase A6                                                                                                                                                    |
|  | 35(VPS16B) | IPI: IPI00910378.1 TREMBL: B4DPI6 ENSEMBL: ENSP00000404815 REFSEQ: NP_001180245 Tax_Id=9606 Gene_Symbol=VIPAR VPS33B-interacting protein isoform 2                                                                                                                                                                     |
|  | 36         | IPI: IPI00026230.1 SWISS-PROT: P55795 ENSEMBL: ENSP00000361927 REFSEQ: NP_001027565;NP_062543 H-INV: HIT000303916 VEGA: OTTHUMP00000023682 Tax_Id=9606 Gene_Symbol=HNRNPH2 Heterogeneous nuclear ribonucleoprotein H2                                                                                                  |
|  | 37         | IPI: IPI00968296.1 TREMBL: Q96CG1 ENSEMBL: ENSP00000421288 VEGA: OTTHUMP00000224067 Tax_Id=9606 Gene_Symbol=ETF1 Uncharacterized protein                                                                                                                                                                               |
|  | 38         | IPI: IPI00218408.1 SWISS-PROT: P22102-2 ENSEMBL: ENSP00000354388 REFSEQ: NP_780294 VEGA: OTTHUMP00000068282 Tax_Id=9606 Gene_Symbol=GART Isoform Short of Trifunctional purine biosynthetic protein adenosine-3                                                                                                        |
|  | 39         | IPI: IPI00003865.1 SWISS-PROT: P11142-1 TREMBL: B3KTV0;B4E1Q1;Q53GZ6;Q96IS6 ENSEMBL: ENSP00000227378;ENSP00000432083;ENSP00000437125 REFSEQ: NP_006588 H-INV: HIT000037619 VEGA: OTTHUMP00000231743;OTTHUMP00000231745;OTTHUMP00000231747 Tax_Id=9606 Gene_Symbol=HSPA8 Isoform 1 of Heat shock cognate 71 kDa protein |
|  | 40         | IPI: IPI00423463.1 SWISS-PROT: P01857 TREMBL: Q6GMX6;Q6N094;Q6PYX1 ENSEMBL: ENSP00000374991 H-INV: HIT000045505 VEGA: OTTHUMP00000201808 Tax_Id=9606 Gene_Symbol=IGHV4-31;IGHG1 Putative uncharacterized protein DKFZp686O01196                                                                                        |
|  | 41         | IPI: IPI00018873.1 SWISS-PROT: P43490 TREMBL: Q658Z1 ENSEMBL: ENSP00000222553 REFSEQ: NP_005737 H-INV: HIT000217435 VEGA: OTTHUMP00000179149 Tax_Id=9606 Gene_Symbol=NAMPT Nicotinamide phosphoribosyltransferase                                                                                                      |

|  |    |                                                                                                                                                                                                                                                                                                         |
|--|----|---------------------------------------------------------------------------------------------------------------------------------------------------------------------------------------------------------------------------------------------------------------------------------------------------------|
|  | 42 | IPI:IPI00020042.2 SWISS-PROT:P43686-1 TREMBL:A8K2M0 ENSEMBL:ENSP00000157812 REFSEQ:NP_006494 Tax_Id=9606 Gene_Symbol=PSMC4 Isoform 1 of 26S protease regulatory subunit 6B                                                                                                                              |
|  | 43 | IPI:IPI00646512.1 TREMBL:A8K6A2;Q5JP00 ENSEMBL:ENSP00000369424 REFSEQ:NP_001185648 VEGA:OTTHUMP00000022994 Tax_Id=9606 Gene_Symbol=RBBP7 histone-binding protein RBBP7 isoform 1                                                                                                                        |
|  | 44 | IPI:IPI00930226.1 TREMBL:B4E3A4 Tax_Id=9606 Gene_Symbol=ACTG1 cDNA FLJ57283, highly similar to Actin, cytoplasmic 2                                                                                                                                                                                     |
|  | 45 | IPI:IPI00398777.3 SWISS-PROT:Q15149-5 TREMBL:Q8WXV5 ENSEMBL:ENSP00000346602 REFSEQ:NP_958784 VEGA:OTTHUMP00000229282 Tax_Id=9606 Gene_Symbol=PLEC Isoform 5 of Plectin                                                                                                                                  |
|  | 46 | IPI:IPI00030320.4 SWISS-PROT:P26196 TREMBL:B2R858 ENSEMBL:ENSP00000264018;ENSP00000433704;ENSP00000442266 REFSEQ:NP_004388 H-INV:HIT000101075 VEGA:OTTHUMP00000232837;OTTHUMP00000232838 Tax_Id=9606 Gene_Symbol=DDX6 Probable ATP-dependent RNA helicase DDX6                                          |
|  | 47 | IPI:IPI01020720.1 TREMBL:B4DI39;B4E1S9;F8VZJ4;Q9UQC1 ENSEMBL:ENSP00000447703;ENSP00000448396;ENSP00000449351 Tax_Id=9606 Gene_Symbol=HSPA1B;HSPA1A cDNA FLJ54328, highly similar to Heat shock 70 kDa protein 1                                                                                         |
|  | 48 | IPI:IPI00019640.1 SWISS-PROT:Q99986 TREMBL:A8K245 ENSEMBL:ENSP00000216639 REFSEQ:NP_003375 H-INV:HIT000337353 Tax_Id=9606 Gene_Symbol=VRK1 Serine/threonine-protein kinase VRK1                                                                                                                         |
|  | 49 | IPI:IPI00001661.3 SWISS-PROT:P18754-2 ENSEMBL:ENSP00000362937 REFSEQ:NP_001041659 VEGA:OTTHUMP00000211005 Tax_Id=9606 Gene_Symbol=RCC1 Isoform 2 of Regulator of chromosome condensation                                                                                                                |
|  | 50 | IPI:IPI00021728.3 SWISS-PROT:P20042 TREMBL:B5BU01;Q3B7I9;Q6IBR8;Q96I16 ENSEMBL:ENSP00000364119 REFSEQ:NP_003899 H-INV:HIT000304172 VEGA:OTTHUMP00000030680 Tax_Id=9606 Gene_Symbol=EIF2S2 Eukaryotic translation initiation factor 2 subunit 2                                                          |
|  | 51 | IPI:IPI00027831.1 SWISS-PROT:Q9BQ67 TREMBL:A0MNN5;B2RDP6;Q8NCK5;Q8TCJ8 ENSEMBL:ENSP00000253237 REFSEQ:NP_113673 H-INV:HIT000030894 Tax_Id=9606 Gene_Symbol=GRWD1 Glutamate-rich WD repeat-containing protein 1                                                                                          |
|  | 52 | IPI:IPI00168728.1 TREMBL:Q8NF17 Tax_Id=9606 Gene_Symbol=IGHM FLJ00385 protein (Fragment)                                                                                                                                                                                                                |
|  | 53 | IPI:IPI00290566.1 SWISS-PROT:P17987 ENSEMBL:ENSP00000317334 REFSEQ:NP_110379 H-INV:HIT000292987 VEGA:OTTHUMP00000017529 Tax_Id=9606 Gene_Symbol=TCPI1 T-complex protein 1 subunit alpha                                                                                                                 |
|  | 54 | IPI:IPI00399007.7 SWISS-PROT:P01859 TREMBL:Q6N093 ENSEMBL:ENSP00000374987 VEGA:OTTHUMP00000201760 Tax_Id=9606 Gene_Symbol=IGHG2 Putative uncharacterized protein DKFZp686I04196 (Fragment)                                                                                                              |
|  | 55 | IPI:IPI00478838.3 SWISS-PROT:Q8WVX9 TREMBL:B2RDG1 ENSEMBL:ENSP00000346874 REFSEQ:NP_115604 H-INV:HIT000255701 VEGA:OTTHUMP00000230853 Tax_Id=9606 Gene_Symbol=FAR1 Fatty acyl-CoA reductase 1                                                                                                           |
|  | 56 | IPI:IPI00784154.1 SWISS-PROT:P10809 TREMBL:B3GQS7;B7Z4F6;B7Z532;B7Z597;B9VP19;B9VPB4;Q53SE2 ENSEMBL:ENSP00000340019;ENSP00000373620 REFSEQ:NP_002147;NP_955472 H-INV:HIT000031088 VEGA:OTTHUMP00000205744 Tax_Id=9606 Gene_Symbol=HSPD1 60 kDa heat shock protein, mitochondrial                        |
|  | 57 | IPI:IPI00784295.2 SWISS-PROT:P07900-1 TREMBL:O75322;Q2VPJ6;Q8TBA7;Q96HX7 ENSEMBL:ENSP00000216281 REFSEQ:NP_005339 H-INV:HIT000275312 Tax_Id=9606 Gene_Symbol=HSP90AA1 Isoform 1 of Heat shock protein HSP 90-alpha                                                                                      |
|  | 58 | IPI:IPI00018219.1 SWISS-PROT:Q15582 ENSEMBL:ENSP00000416330 REFSEQ:NP_000349 H-INV:HIT000029343 VEGA:OTTHUMP00000223339 Tax_Id=9606 Gene_Symbol=TGFBI Transforming growth factor-beta-induced protein ig-h3                                                                                             |
|  | 59 | IPI:IPI00414676.6 SWISS-PROT:P08238 TREMBL:A8K3W9;B4DGL0;B4DMA2;Q6PK50;Q9H6X9 ENSEMBL:ENSP00000325875;ENSP00000360609;ENSP00000360709 REFSEQ:NP_031381 H-INV:HIT000253179 VEGA:OTTHUMP00000016517;OTTHUMP00000016518;OTTHUMP00000016519 Tax_Id=9606 Gene_Symbol=HSP90AB1 Heat shock protein HSP 90-beta |
|  | 60 | IPI:IPI00015671.3 SWISS-PROT:A6NHL2-1 ENSEMBL:ENSP00000369784 REFSEQ:NP_079079 H-INV:HIT000008592 VEGA:OTTHUMP00000019000 Tax_Id=9606 Gene_Symbol=TUBAL3 Isoform 1 of Tubulin alpha chain-like 3                                                                                                        |
|  | 61 | IPI:IPI00910979.1 TREMBL:B4DUU6 ENSEMBL:ENSP00000403365 REFSEQ:NP_001193727 Tax_Id=9606 Gene_Symbol=PKM2 pyruvate kinase isozymes M1/M2 isoform e                                                                                                                                                       |
|  | 62 | IPI:IPI00013508.5 SWISS-PROT:P12814-1 ENSEMBL:ENSP00000193403 REFSEQ:NP_001093 H-INV:HIT000037309 Tax_Id=9606 Gene_Symbol=ACTN1 Isoform 1 of Alpha-actinin-1                                                                                                                                            |

|  |          |                                                                                                                                                                                                                                   |
|--|----------|-----------------------------------------------------------------------------------------------------------------------------------------------------------------------------------------------------------------------------------|
|  | 63       | IPI:IP10004968.1 SWISS-PROT:Q9UMS4 ENSEMBL:ENSP00000227524 REFSEQ:NP_055317 H-INV:HIT000244630 VEGA:OTTHUMP00000236892 Tax_Id=9606<br>Gene_Symbol=PRPF19 Pre-mRNA-processing factor 19                                            |
|  | 64(GDI2) | IPI:IP101032306.1 ENSEMBL:ENSG00000057608 Tax_Id=2665 Gene_Symbol=GDI2 GDP dissociation inhibitor 2                                                                                                                               |
|  | 65       | IPI:IP100185374.4 SWISS-PROT:O00232 ENSEMBL:ENSP00000348442 REFSEQ:NP_002807 H-INV:HIT000038526 VEGA:OTTHUMP00000179135 Tax_Id=9606<br>Gene_Symbol=PSMD12 26S proteasome non-ATPase regulatory subunit 12                         |
|  | 66       | IPI:IP100306642.3 SWISS-PROT:Q9NV06-1 ENSEMBL:ENSP00000297579 REFSEQ:NP_056235 H-INV:HIT000011071 VEGA:OTTHUMP00000227826 Tax_Id=9606<br>Gene_Symbol=DCAF13 DDB1- and CUL4-associated factor 13                                   |
|  | 67       | IPI:IP100455383.4 SWISS-PROT:Q00610-2 ENSEMBL:ENSP00000376763 VEGA:OTTHUMP00000165785 Tax_Id=9606 Gene_Symbol=CLTC Isoform 2 of Clathrin heavy chain 1                                                                            |
|  | 68       | IPI:IP100788849.1 TREMBL:Q05BK6;Q7Z426;Q7Z427 ENSEMBL:ENSP00000397182;ENSP00000409727;ENSP00000417952 REFSEQ:NP_001182408 VEGA:OTTHUMP00000214046;OTTHUMP00000214048 Tax_Id=9606 Gene_Symbol=TFG protein TFG isoform 2            |
|  | 69       | IPI:IP100880060.2 TREMBL:A8MT37;F5H7D7;Q68D16 ENSEMBL:ENSP00000381301;ENSP00000442593 VEGA:OTTHUMP00000198367 Tax_Id=9606 Gene_Symbol=GSK3A<br>Uncharacterized protein                                                            |
|  | 70       | IPI:IP100027463.1 SWISS-PROT:P06703 TREMBL:B2R577 ENSEMBL:ENSP00000357708;ENSP00000357709 REFSEQ:NP_055439 H-INV:HIT000034143 VEGA:OTTHUMP00000015472;OTTHUMP00000015473 Tax_Id=9606 Gene_Symbol=S100A6 Protein S100-A6           |
|  | 71       | IPI:IP100789134.5 TREMBL:A4UCT1;E7EPW1;E7EUT5;Q16768;Q5ZEY3 ENSEMBL:ENSP00000380065 VEGA:OTTHUMP00000174433 Tax_Id=9606 Gene_Symbol=GAPDH<br>Glyceraldehyde-3-phosphate dehydrogenase                                             |
|  | 72       | IPI:IP100186290.6 SWISS-PROT:P13639 TREMBL:Q6PK56;Q8TA90 ENSEMBL:ENSP00000307940 REFSEQ:NP_001952 H-INV:HIT000326370 Tax_Id=9606 Gene_Symbol=EEF2<br>Elongation factor 2                                                          |
|  | 73       | IPI:IP100942979.1 SWISS-PROT:P29401 TREMBL:Q53EM5 ENSEMBL:ENSP00000405455;ENSP00000417773 REFSEQ:NP_001055;NP_001128527 H-INV:HIT000055895 VEGA:OTTHUMP00000212664;OTTHUMP00000212668 Tax_Id=9606 Gene_Symbol=TKT Transketolase   |
|  | 74       | IPI:IP100027626.3 SWISS-PROT:P40227 TREMBL:B2R9K8;Q59ET3 ENSEMBL:ENSP00000275603 REFSEQ:NP_001753 H-INV:HIT000078722 VEGA:OTTHUMP00000159736<br>Tax_Id=9606 Gene_Symbol=CCT6A T-complex protein 1 subunit zeta                    |
|  | 75       | IPI:IP100027704.5 SWISS-PROT:P49642 ENSEMBL:ENSP00000350491 REFSEQ:NP_000937 H-INV:HIT000032334 Tax_Id=9606 Gene_Symbol=PRIM1 DNA primase small subunit                                                                           |
|  | 76       | IPI:IP100156032.6 SWISS-PROT:Q13601 TREMBL:A0JLP0;B2R989 ENSEMBL:ENSP00000229214 REFSEQ:NP_008974 H-INV:HIT000042016 Tax_Id=9606 Gene_Symbol=KRR1<br>KRR1 small subunit processome component homolog                              |
|  | 77       | IPI:IP100647506.1 TREMBL:Q5SQP8;Q8IY44 ENSEMBL:ENSP00000357816 VEGA:OTTHUMP00000020700 Tax_Id=9606 Gene_Symbol=CTBP2 Uncharacterized protein                                                                                      |
|  | 78       | IPI:IP100883857.2 SWISS-PROT:Q00839-1 TREMBL:Q5RI17;Q96BA7 ENSEMBL:ENSP00000283179 REFSEQ:NP_114032 VEGA:OTTHUMP00000038193 Tax_Id=9606<br>Gene_Symbol=HNRNPU Isoform Long of Heterogeneous nuclear ribonucleoprotein U           |
|  | 79       | IPI:IP100947554.1 TREMBL:C9JGW8;Q8NBY1 ENSEMBL:ENSP00000346755 VEGA:OTTHUMP00000215134 Tax_Id=9606 Gene_Symbol=MST4 cDNA FLJ90669 fis, clone<br>PLACE1005519, moderately similar to Homo sapiens STE20-like kinase 3 (mst-3) mRNA |
|  | 80       | IPI:IP100376005.2 SWISS-PROT:P63241-2 ENSEMBL:ENSP00000336702 REFSEQ:NP_001137232 H-INV:HIT000250756 Tax_Id=9606 Gene_Symbol=EIF5A Isoform 2 of<br>Eukaryotic translation initiation factor 5A-1                                  |
|  | 81       | IPI:IP101008914.1 TREMBL:B4E047 REFSEQ:NP_001191439 Tax_Id=9606 Gene_Symbol=EIF4A1 eukaryotic initiation factor 4A-I isoform 2                                                                                                    |
|  | 82       | IPI:IP100017334.1 SWISS-PROT:P35232 TREMBL:A8K401;Q53FV0;Q6FHP5;Q6PUJ7 ENSEMBL:ENSP00000300408 REFSEQ:NP_002625 H-INV:HIT000298776 VEGA:OTTHUMP00000165764 Tax_Id=9606 Gene_Symbol=PHB Prohibitin                                 |
|  | 83       | IPI:IP100930343.1 TREMBL:A8K3K1 Tax_Id=9606 Gene_Symbol=ACTC1 cDNA FLJ78096, highly similar to Homo sapiens actin, alpha, cardiac muscle (ACTC), mRNA                                                                             |
|  | 84       | IPI:IP100013895.1 SWISS-PROT:P31949 TREMBL:B2R5H0 ENSEMBL:ENSP00000271638 REFSEQ:NP_005611 H-INV:HIT000101457 VEGA:OTTHUMP00000015271<br>Tax_Id=9606 Gene_Symbol=S100A11 Protein S100-A11                                         |
|  | 85       | IPI:IP100022694.3 SWISS-PROT:P55036-1 ENSEMBL:ENSP00000357879 REFSEQ:NP_002801 H-INV:HIT000218749 VEGA:OTTHUMP00000014286 Tax_Id=9606<br>Gene_Symbol=PSMD4 Isoform Rpn10A of 26S proteasome non-ATPase regulatory subunit 4       |

|     |                                                                                                                                                                                                                                                                                            |
|-----|--------------------------------------------------------------------------------------------------------------------------------------------------------------------------------------------------------------------------------------------------------------------------------------------|
| 86  | IPI: IPI00444262.3 TREMBL: E7EX81; Q6ZS99 ENSEMBL: ENSP00000375887 H-INV: HIT000047481 Tax_Id=9606 Gene_Symbol=NCL cDNA FLJ45706 fis, clone FEBRA2028457, highly similar to Nucleolin                                                                                                      |
| 87  | IPI: IPI01022143.1 TREMBL: F5GWF6 ENSEMBL: ENSP00000441847 Tax_Id=9606 Gene_Symbol=CCT2 Uncharacterized protein                                                                                                                                                                            |
| 88  | IPI: IPI01022171.1 TREMBL: F8VJR2 ENSEMBL: ENSP00000448661 Tax_Id=9606 Gene_Symbol=NAP1L1 Uncharacterized protein                                                                                                                                                                          |
| 89  | IPI: IPI00007765.5 SWISS-PROT: P38646 TREMBL: Q8N1C8 ENSEMBL: ENSP00000297185 REFSEQ: NP_004125 H-INV: HIT000192047 VEGA: OTTHUMP00000159494 Tax_Id=9606 Gene_Symbol=HSPA9 Stress-70 protein, mitochondrial                                                                                |
| 90  | IPI: IPI00008982.1 SWISS-PROT: P54886-1 ENSEMBL: ENSP00000360268 REFSEQ: NP_002851 H-INV: HIT000221298 VEGA: OTTHUMP00000020159 Tax_Id=9606 Gene_Symbol=ALDH18A1 Isoform Long of Delta-1-pyrroline-5-carboxylate synthase                                                                  |
| 91  | IPI: IPI00018398.4 SWISS-PROT: P17980 TREMBL: A8K781 ENSEMBL: ENSP00000298852 REFSEQ: NP_002795 H-INV: HIT000033914 VEGA: OTTHUMP00000236492 Tax_Id=9606 Gene_Symbol=PSMC3 26S protease regulatory subunit 6A                                                                              |
| 92  | IPI: IPI00103467.5 SWISS-PROT: P30837 ENSEMBL: ENSP00000366927 REFSEQ: NP_000683 H-INV: HIT000030521 VEGA: OTTHUMP00000021399 Tax_Id=9606 Gene_Symbol=ALDH1B1 Aldehyde dehydrogenase X, mitochondrial                                                                                      |
| 93  | IPI: IPI00177728.3 SWISS-PROT: Q96KP4-1 TREMBL: B4DPF1; B4DV28 ENSEMBL: ENSP00000325548 REFSEQ: NP_060705 H-INV: HIT000030359 VEGA: OTTHUMP00000163752 Tax_Id=9606 Gene_Symbol=CNDP2 Isoform 1 of Cytosolic non-specific dipeptidase                                                       |
| 94  | IPI: IPI00220834.8 SWISS-PROT: P13010 TREMBL: Q53T09; Q53TC2 ENSEMBL: ENSP00000375977; ENSP00000375978 REFSEQ: NP_066964 H-INV: HIT000195394 VEGA: OTTHUMP00000164061 Tax_Id=9606 Gene_Symbol=XRCC5 X-ray repair cross-complementing protein 5                                             |
| 95  | IPI: IPI00296191.1 SWISS-PROT: Q9UI12-1 TREMBL: B3KUZ7; E9PGE6; Q8TF11 ENSEMBL: ENSP00000352522; ENSP00000379995 REFSEQ: NP_057025; NP_998785 H-INV: HIT000005619 VEGA: OTTHUMP00000226228; OTTHUMP00000226254 Tax_Id=9606 Gene_Symbol=ATP6V1H Isoform 1 of V-type proton ATPase subunit H |
| 96  | IPI: IPI00297261.3 SWISS-PROT: P18031 TREMBL: A8K3M3 ENSEMBL: ENSP00000360683 REFSEQ: NP_002818 H-INV: HIT000037246 VEGA: OTTHUMP00000031266 Tax_Id=9606 Gene_Symbol=PTPN1 Tyrosine-protein phosphatase non-receptor type 1                                                                |
| 97  | IPI: IPI00412713.4 SWISS-PROT: Q9Y512 TREMBL: B4DN54 ENSEMBL: ENSP00000345445 REFSEQ: NP_056195 H-INV: HIT000287974 VEGA: OTTHUMP00000197826 Tax_Id=9606 Gene_Symbol=SAMM50 Sorting and assembly machinery component 50 homolog                                                            |
| 98  | IPI: IPI00455268.4 SWISS-PROT: Q32P41 TREMBL: B2RN19 ENSEMBL: ENSP00000261249 REFSEQ: NP_065861 H-INV: HIT000339023 Tax_Id=9606 Gene_Symbol=TRMT5 tRNA (guanine-N(1)-)-methyltransferase                                                                                                   |
| 99  | IPI: IPI00550192.2 SWISS-PROT: Q9NQH7-1 ENSEMBL: ENSP00000349658 REFSEQ: NP_071381 VEGA: OTTHUMP00000199806 Tax_Id=9606 Gene_Symbol=XPNPEP3 Isoform 1 of Probable Xaa-Pro aminopeptidase 3                                                                                                 |
| 100 | IPI: IPI00798375.2 TREMBL: B4DLW8; B4DNG2; E7ETL9 ENSEMBL: ENSP00000403085 Tax_Id=9606 Gene_Symbol=DDX5 cDNA FLJ59357, highly similar to Probable ATP-dependent RNA helicase DDX5                                                                                                          |
| 101 | IPI: IPI00878517.1 TREMBL: B7WNR0 ENSEMBL: ENSP00000384695 VEGA: OTTHUMP00000196832 Tax_Id=9606 Gene_Symbol=ALB Uncharacterized protein                                                                                                                                                    |
| 102 | IPI: IPI00909058.1 TREMBL: B4E318 ENSEMBL: ENSP00000394758 Tax_Id=9606 Gene_Symbol=BCCIP cDNA FLJ54246, highly similar to Homo sapiens BRCA2 and CDKN1A interacting protein (BCCIP), transcript variant C, mRNA                                                                            |
| 103 | IPI: IPI00909779.1 TREMBL: B4DFG0 ENSEMBL: ENSP00000421165 VEGA: OTTHUMP00000221545 Tax_Id=9606 Gene_Symbol=DEK cDNA FLJ53031, highly similar to Protein DEK                                                                                                                               |
| 104 | IPI: IPI01012853.1 TREMBL: B4DDG7 ENSEMBL: ENSP00000445682 Tax_Id=9606 Gene_Symbol=AP1M1 cDNA FLJ57898, highly similar to Adaptor-related protein complex 1 mu-1 subunit                                                                                                                   |
| 105 | IPI: IPI00302944.3 SWISS-PROT: Q99715-4 ENSEMBL: ENSP00000406049; ENSP00000412864 VEGA: OTTHUMP00000219466 Tax_Id=9606 Gene_Symbol=COL12A1 Isoform 4 of Collagen alpha-1(XII) chain                                                                                                        |
| 106 | IPI: IPI00877635.1 TREMBL: Q49AJ9; Q8TBW1; Q9BT63; Q9NY85 ENSEMBL: ENSP00000386101 VEGA: OTTHUMP00000199075 Tax_Id=9606 Gene_Symbol=SNORD43; RPL3 Ribosomal protein L3, isoform CRA_b                                                                                                      |
| 107 | IPI: IPI00943563.1 SWISS-PROT: O75369-2 ENSEMBL: ENSP00000351339 REFSEQ: NP_001157791 VEGA: OTTHUMP00000214209 Tax_Id=9606 Gene_Symbol=FLNB Isoform 2 of Filamin-B                                                                                                                         |

|  |     |                                                                                                                                                                                                                                                                                        |
|--|-----|----------------------------------------------------------------------------------------------------------------------------------------------------------------------------------------------------------------------------------------------------------------------------------------|
|  | 108 | IPI: IPI00291467.7 SWISS-PROT: P12236 TREMBL: O75961; Q59EI9; Q6I9V5 ENSEMBL: ENSP00000370808 REFSEQ: NP_001627 VEGA: OTTHUMP00000022826 Tax_Id=9606 Gene_Symbol=SLC25A6 ADP/ATP translocase 3                                                                                         |
|  | 109 | IPI: IPI01015939.2 TREMBL: F5GZK5 ENSEMBL: ENSP00000444379 Tax_Id=9606 Gene_Symbol=CCT7 Uncharacterized protein                                                                                                                                                                        |
|  | 110 | IPI: IPI00009342.1 SWISS-PROT: P46940 TREMBL: A4QPB0; B4DNP4; B4E2M0; F5H7A1; Q05DN7; Q5FWG8; Q6P1N4; Q96PA3 ENSEMBL: ENSP00000268182 REFSEQ: NP_003861 H-                                                                                                                             |
|  | 111 | IPI: IPI00011416.2 SWISS-PROT: Q13011 ENSEMBL: ENSP00000221418 REFSEQ: NP_001389 H-INV: HIT000035456 Tax_Id=9606 Gene_Symbol=ECH1 Delta(3,5)-Delta(2,4)-dienoyl-CoA isomerase, mitochondrial                                                                                           |
|  | 112 | IPI: IPI00335589.5 SWISS-PROT: Q9HC36 ENSEMBL: ENSP00000306080 REFSEQ: NP_060616 H-INV: HIT000072714 VEGA: OTTHUMP00000115320 Tax_Id=9606 Gene_Symbol=RNMTL1 RNA methyltransferase-like protein 1                                                                                      |
|  | 113 | IPI: IPI00455315.4 SWISS-PROT: P07355-1 ENSEMBL: ENSP00000379342; ENSP00000387545; ENSP00000411352 REFSEQ: NP_001002857; NP_001129487; NP_004030 H-INV: HIT000334547 VEGA: OTTHUMP00000163650 Tax_Id=9606 Gene_Symbol=ANXA2 Isoform 1 of Annexin A2                                    |
|  | 114 | IPI: IPI00939289.1 TREMBL: B4DHT9; B4DU71; E9PEX3 ENSEMBL: ENSP00000413047 Tax_Id=9606 Gene_Symbol=HSP90B1 Uncharacterized protein                                                                                                                                                     |
|  | 115 | IPI: IPI01010797.1 TREMBL: B2RCM3; Q59EF6 ENSEMBL: ENSP00000355834 Tax_Id=9606 Gene_Symbol=CAPN2 cDNA, FLJ96158, highly similar to Homo sapiens calpain 2, (m/II) large subunit (CAPN2), mRNA                                                                                          |
|  | 116 | IPI: IPI00001159.11 SWISS-PROT: Q92616 TREMBL: B4DM32; E1NZA1 ENSEMBL: ENSP00000300648 REFSEQ: NP_006827 H-INV: HIT000042355 Tax_Id=9606 Gene_Symbol=GCN1L1 Translational activator GCN1                                                                                               |
|  | 117 | IPI: IPI00002214.1 SWISS-PROT: P52292 TREMBL: A8K7D9; Q53YE3; Q6NVW7; Q7Z726 ENSEMBL: ENSP00000332455; ENSP00000438483 REFSEQ: NP_002257 H-INV: HIT000284723 Tax_Id=9606 Gene_Symbol=KPNA2 Importin subunit alpha-2                                                                    |
|  | 118 | IPI: IPI00007074.5 SWISS-PROT: P54577 ENSEMBL: ENSP00000362576 REFSEQ: NP_003671 H-INV: HIT000045086 VEGA: OTTHUMP00000004027 Tax_Id=9606 Gene_Symbol=YARS Tyrosyl-tRNA synthetase, cytoplasmic                                                                                        |
|  | 119 | IPI: IPI00011274.3 SWISS-PROT: O14979-1 TREMBL: B4DGN3; B4DTA2 ENSEMBL: ENSP00000295470; ENSP00000422040 REFSEQ: NP_112740 H-INV: HIT000058500 VEGA: OTTHUMP00000160812; OTTHUMP00000219470 Tax_Id=9606 Gene_Symbol=HNRPDL Isoform 1 of Heterogeneous nuclear ribonucleoprotein D-like |
|  | 120 | IPI: IPI00016610.2 SWISS-PROT: Q15365 TREMBL: Q53SS8 ENSEMBL: ENSP00000305556 REFSEQ: NP_006187 H-INV: HIT000303351 VEGA: OTTHUMP00000160048 Tax_Id=9606 Gene_Symbol=PCBP1 Poly(rC)-binding protein 1                                                                                  |
|  | 121 | IPI: IPI00019353.4 SWISS-PROT: Q53H12-1 TREMBL: A4D1U5; B4E2Z8 ENSEMBL: ENSP00000347581 REFSEQ: NP_060708 H-INV: HIT000004178 VEGA: OTTHUMP00000212223 Tax_Id=9606 Gene_Symbol=AGK Isoform 1 of Acylglycerol kinase, mitochondrial                                                     |
|  | 122 | IPI: IPI00027251.1 SWISS-PROT: Q15208 TREMBL: B2R6F9; Q9UPD3 ENSEMBL: ENSP00000229812 REFSEQ: NP_009202 H-INV: HIT000035646 VEGA: OTTHUMP00000016293 Tax_Id=9606 Gene_Symbol=STK38 Serine/threonine-protein kinase 38                                                                  |
|  | 123 | IPI: IPI00028091.3 SWISS-PROT: P61158 TREMBL: Q53QM2; Q59FV6 ENSEMBL: ENSP00000263238 REFSEQ: NP_005712 H-INV: HIT000052876 VEGA: OTTHUMP00000203980 Tax_Id=9606 Gene_Symbol=ACTR3 Actin-related protein 3                                                                             |
|  | 124 | IPI: IPI00028635.5 SWISS-PROT: P04844 TREMBL: B2RE46 ENSEMBL: ENSP00000237530 REFSEQ: NP_002942 H-INV: HIT000283859 VEGA: OTTHUMP00000030900 Tax_Id=9606 Gene_Symbol=RPN2 Dolichyl-diphosphooligosaccharide--protein glycosyltransferase subunit 2                                     |
|  | 125 | IPI: IPI00215637.5 SWISS-PROT: O00571 TREMBL: B5BTY4; Q59GX6 ENSEMBL: ENSP00000382840 REFSEQ: NP_001347 H-INV: HIT000220175 VEGA: OTTHUMP00000023143 Tax_Id=9606 Gene_Symbol=DDX3X ATP-dependent RNA helicase DDX3X                                                                    |
|  | 126 | IPI: IPI00304232.1 SWISS-PROT: Q9GZL7 TREMBL: B4DRY7; Q53T99 ENSEMBL: ENSP00000261015 REFSEQ: NP_060726 H-INV: HIT000293185 VEGA: OTTHUMP00000163754 Tax_Id=9606 Gene_Symbol=WDR12 Ribosome biogenesis protein WDR12                                                                   |
|  | 127 | IPI: IPI00333619.4 SWISS-PROT: P51648-1 TREMBL: Q59H65; Q68D64; Q6I9T3 ENSEMBL: ENSP00000176643; ENSP00000378942 REFSEQ: NP_000373 VEGA: OTTHUMP00000065799; OTTHUMP00000065801 Tax_Id=9606 Gene_Symbol=ALDH3A2 Isoform 1 of Fatty aldehyde dehydrogenase                              |
|  | 128 | IPI: IPI00376215.2 SWISS-PROT: P78527-2 TREMBL: B4DL41; E7EUY0 ENSEMBL: ENSP00000345182; ENSP00000442177 REFSEQ: NP_001075109 VEGA: OTTHUMP00000237534 Tax_Id=9606 Gene_Symbol=PRKDC                                                                                                   |
|  | 129 | IPI: IPI00382580.1 TREMBL: O15376 Tax_Id=9606 Gene_Symbol=ARHGAP1 CDC42 GAP-related protein (Fragment)                                                                                                                                                                                 |

|     |                                                                                                                                                                                                                                                                                                                                                       |
|-----|-------------------------------------------------------------------------------------------------------------------------------------------------------------------------------------------------------------------------------------------------------------------------------------------------------------------------------------------------------|
| 130 | IPI:IP100384016.1 TREMBL:Q6LEQ7;Q86SW4 ENSEMBL:ENSP00000451957 Tax_Id=9606 Gene_Symbol=DLST;DLSTP1 Full-length cDNA 5-PRIME end of clone CS0DJ009YL13 of T cells (Jurkat cell line) of Homo sapiens                                                                                                                                                   |
| 131 | IPI:IP100384973.1 SWISS-PROT:P18206-3 Tax_Id=9606 Gene_Symbol=VCL Isoform 3 of Vinculin                                                                                                                                                                                                                                                               |
| 132 | IPI:IP100410714.5 SWISS-PROT:P69905 TREMBL:D1MGQ2;E1B2D1;E9LUX2;E9M4D4;Q4ZGM8;Q7Z6G4;Q7Z7B4;Q86YQ5;Q96T46;Q9BX83 ENSEMBL:ENSP00000251595;ENSP00000322421 REFSEQ:NP_000508;NP_000549 H-INV:HIT000273650 VEGA:OTTHUMP00000066291;OTTHUMP00000066501 Tax_Id=9606 Gene_Symbol=HBA2;HBA1 Hemoglobin subunit alpha                                          |
| 133 | IPI:IP100443478.1 SWISS-PROT:P14136-3 Tax_Id=9606 Gene_Symbol=GFAP Isoform 3 of Glial fibrillary acidic protein                                                                                                                                                                                                                                       |
| 134 | IPI:IP100470573.1 TREMBL:B4DHK9;E9PF41 ENSEMBL:ENSP00000367220 REFSEQ:NP_001005386 H-INV:HIT000057727 VEGA:OTTHUMP00000202270 Tax_Id=9606 Gene_Symbol=ACTR2 actin-related protein 2 isoform a                                                                                                                                                         |
| 135 | IPI:IP100642156.1 SWISS-PROT:Q5JPH6 ENSEMBL:ENSP00000343488;ENSP00000395196 REFSEQ:NP_001077083 H-INV:HIT000027401 Tax_Id=9606 Gene_Symbol=EARS2 Probable glutamyl-tRNA synthetase, mitochondrial                                                                                                                                                     |
| 136 | IPI:IP100910458.2 TREMBL:Q5T6W2 ENSEMBL:ENSP00000409456 VEGA:OTTHUMP00000021555 Tax_Id=9606 Gene_Symbol=HNRNPK Uncharacterized protein                                                                                                                                                                                                                |
| 137 | IPI:IP101009326.1 TREMBL:B4DEM7;Q7Z759 ENSEMBL:ENSP00000444984 Tax_Id=9606 Gene_Symbol=CCT8 cDNA FLJ53379, highly similar to T-complex protein 1 subunit                                                                                                                                                                                              |
| 138 | IPI:IP101010020.1 TREMBL:B7ZAV6 ENSEMBL:ENSP00000438253;ENSP00000438964 Tax_Id=9606 Gene_Symbol=KPNB1 cDNA, FLJ79320, highly similar to Importin beta-1 subunit                                                                                                                                                                                       |
| 139 | IPI:IP101010748.1 TREMBL:F8W984 ENSEMBL:ENSP00000383237 Tax_Id=9606 Gene_Symbol=RRP1 Uncharacterized protein                                                                                                                                                                                                                                          |
| 140 | IPI:IP101015023.1 TREMBL:B4DGN5 ENSEMBL:ENSP00000444732 Tax_Id=9606 Gene_Symbol=GLUD1 cDNA FLJ55203, highly similar to Glutamate dehydrogenase 1,                                                                                                                                                                                                     |
| 141 | IPI:IP100171611.7 SWISS-PROT:Q71DI3 ENSEMBL:ENSP00000333277;ENSP00000358154;ENSP00000385479 REFSEQ:NP_001005464;NP_001116847;NP_066403 VEGA:OTTHUMP00000013917;OTTHUMP00000013919;OTTHUMP00000014041 Tax_Id=9606 Gene_Symbol=HIST2H3D;HIST2H3A;HIST2H3C Histone H3.2                                                                                  |
| 142 | IPI:IP101022806.1 TREMBL:F8VR77 ENSEMBL:ENSP00000448557 Tax_Id=9606 Gene_Symbol=PA2G4 Uncharacterized protein                                                                                                                                                                                                                                         |
| 143 | IPI:IP100917623.1 TREMBL:B3KRM8;B7Z5D9;E9PGT1 ENSEMBL:ENSP00000387263;ENSP00000395946 VEGA:OTTHUMP00000203715 Tax_Id=9606 Gene_Symbol=TSN Uncharacterized protein                                                                                                                                                                                     |
| 144 | IPI:IP100219217.3 SWISS-PROT:P07195 TREMBL:Q5U077 ENSEMBL:ENSP00000229319;ENSP00000379386 REFSEQ:NP_001167568;NP_002291 H-INV:HIT000037014 VEGA:OTTHUMP00000165228;OTTHUMP00000165229 Tax_Id=9606 Gene_Symbol=LDHB L-lactate dehydrogenase B chain                                                                                                    |
| 145 | IPI:IP100784001.5 H-INV:HIT000291414 Tax_Id=9606 Gene_Symbol=- Conserved hypothetical protein                                                                                                                                                                                                                                                         |
| 146 | IPI:IP100007427.2 TREMBL:B2R7D7;Q4JM47;Q53G64 ENSEMBL:ENSP00000388342 Tax_Id=9606 Gene_Symbol=AGR2 AGR2                                                                                                                                                                                                                                               |
| 147 | IPI:IP100008274.8 SWISS-PROT:Q01518-1 TREMBL:B2RDY9;B4DI38;B4DNW7;B4DNY3;D3DPU2 ENSEMBL:ENSP00000361878;ENSP00000361883;ENSP00000361891 REFSEQ:NP_001099000;NP_006358 H-INV:HIT000192150 VEGA:OTTHUMP00000004820;OTTHUMP00000004821;OTTHUMP00000004822 Tax_Id=9606 Gene_Symbol=CAP1 Isoform 1 of Adenylyl cyclase-associated protein 1                |
| 148 | IPI:IP100014230.1 SWISS-PROT:Q07021 TREMBL:A8K651 ENSEMBL:ENSP00000225698 REFSEQ:NP_001203 H-INV:HIT000286556 Tax_Id=9606 Gene_Symbol=C1QBP Complement component 1 Q subcomponent-binding protein, mitochondrial                                                                                                                                      |
| 149 | IPI:IP100020599.1 SWISS-PROT:P27797 TREMBL:B4DHR1;Q53G71 ENSEMBL:ENSP00000320866 REFSEQ:NP_004334 H-INV:HIT000283506 Tax_Id=9606 Gene_Symbol=CALR Calreticulin                                                                                                                                                                                        |
| 150 | IPI:IP100027497.5 SWISS-PROT:P06744 ENSEMBL:ENSP00000348877 REFSEQ:NP_000166 H-INV:HIT000049155 Tax_Id=9606 Gene_Symbol=GPI Glucose-6-phosphate                                                                                                                                                                                                       |
| 151 | IPI:IP100219038.9 SWISS-PROT:P84243 TREMBL:A8K4Y7;B2R4P9;B2R6Y1;Q6TXQ4 ENSEMBL:ENSP00000254810;ENSP00000355778;ENSP00000355780;ENSP00000355781 REFSEQ:NP_002098;NP_005315 H-INV:HIT000054194;HIT000271836;HIT000288836 VEGA:OTTHUMP00000035618;OTTHUMP00000035619;OTTHUMP00000035621 Tax_Id=9606 Gene_Symbol=H3F3A;H3F3B;H3F3AP6;H3F3AP4 Histone H3.3 |



|     |                                                                                                                                                                                                                                                                                                                                                                              |
|-----|------------------------------------------------------------------------------------------------------------------------------------------------------------------------------------------------------------------------------------------------------------------------------------------------------------------------------------------------------------------------------|
| 152 | IPI: IPI00221091.9 SWISS-PROT: P62244 TREMBL: A8K7H3;B2R4W8 ENSEMBL: ENSP00000318646 REFSEQ: NP_001010;NP_001025180 H-INV: HIT000338243 VEGA: OTTHUMP00000162054 Tax_Id=9606 Gene_Symbol=RPS15A 40S ribosomal protein S15a                                                                                                                                                   |
| 153 | IPI: IPI00239077.5 SWISS-PROT: P49773 ENSEMBL: ENSP00000304229 REFSEQ: NP_005331 H-INV: HIT000033040 VEGA: OTTHUMP00000159244 Tax_Id=9606 Gene_Symbol=HINT1 Histidine triad nucleotide-binding protein 1                                                                                                                                                                     |
| 154 | IPI: IPI00374151.1 TREMBL: E9PH29;Q14579 ENSEMBL: ENSP00000349432 REFSEQ: NP_054817 Tax_Id=9606 Gene_Symbol=PRDX3 thioredoxin-dependent peroxide reductase, mitochondrial isoform b                                                                                                                                                                                          |
| 155 | IPI: IPI00514053.1 SWISS-PROT: P48444 TREMBL: B0YIW5;B4E1X2 ENSEMBL: ENSP00000264028 REFSEQ: NP_001646 H-INV: HIT000323834 VEGA: OTTHUMP00000232680 Tax_Id=9606 Gene_Symbol=ARCN1 Coatomer subunit delta                                                                                                                                                                     |
| 156 | IPI: IPI00797822.2 TREMBL: B4DP75 ENSEMBL: ENSP00000412856 Tax_Id=9606 Gene_Symbol=PHB2 cDNA FLJ56579, highly similar to Prohibitin-2                                                                                                                                                                                                                                        |
| 157 | IPI: IPI00947127.1 TREMBL: B7Z5E3 ENSEMBL: ENSP00000445175 REFSEQ: NP_001158886 Tax_Id=9606 Gene_Symbol=LDHA L-lactate dehydrogenase A chain isoform 3                                                                                                                                                                                                                       |
| 158 | IPI: IPI00964025.1 TREMBL: D6RDF4 Tax_Id=9606 Gene_Symbol=GNB2L1 Uncharacterized protein                                                                                                                                                                                                                                                                                     |
| 159 | IPI: IPI01009792.1 TREMBL: B4DQ19 ENSEMBL: ENSP00000437979 Tax_Id=9606 Gene_Symbol=SAR1A cDNA FLJ58922, highly similar to GTP-binding protein SAR1a                                                                                                                                                                                                                          |
| 160 | IPI: IPI00000874.1 SWISS-PROT: Q06830 TREMBL: B2R4P2 ENSEMBL: ENSP00000262746;ENSP00000361152 REFSEQ: NP_001189360;NP_002565;NP_859047;NP_859048 H-INV: HIT000039247 VEGA: OTTHUMP00000009234 Tax_Id=9606 Gene_Symbol=PRDX1 Peroxiredoxin-1                                                                                                                                  |
| 161 | IPI: IPI00001757.1 SWISS-PROT: Q9Y5S9-1 ENSEMBL: ENSP00000333001 REFSEQ: NP_005096 H-INV: HIT000264406 VEGA: OTTHUMP00000015573 Tax_Id=9606 Gene_Symbol=RBM8A Isoform 1 of RNA-binding protein 8A                                                                                                                                                                            |
| 162 | IPI: IPI00007402.3 SWISS-PROT: O95373 TREMBL: B3KNG9;B3KQG6 ENSEMBL: ENSP00000369042 REFSEQ: NP_006382 H-INV: HIT000068560 VEGA: OTTHUMP00000230867 Tax_Id=9606 Gene_Symbol=IPO7 Importin-7                                                                                                                                                                                  |
| 163 | IPI: IPI00010720.1 SWISS-PROT: P48643 TREMBL: A8K2X8;B4DX08;Q9BU08 ENSEMBL: ENSP00000280326 REFSEQ: NP_036205 H-INV: HIT000095964 VEGA: OTTHUMP00000161671 Tax_Id=9606 Gene_Symbol=CCT5 T-complex protein 1 subunit epsilon                                                                                                                                                  |
| 164 | IPI: IPI00010796.1 SWISS-PROT: P07237 TREMBL: B4DJS0 ENSEMBL: ENSP00000327801 REFSEQ: NP_000909 H-INV: HIT000040847 VEGA: OTTHUMP00000196834 Tax_Id=9606 Gene_Symbol=P4HB Protein disulfide-isomerase                                                                                                                                                                        |
| 165 | IPI: IPI00010951.2 SWISS-PROT: P58107 TREMBL: E9PPU0;Q9NSU9 ENSEMBL: ENSP00000436337 REFSEQ: NP_112598 H-INV: HIT000026013 VEGA: OTTHUMP00000228909 Tax_Id=9606 Gene_Symbol=EPPK1 Epiplakin                                                                                                                                                                                  |
| 166 | IPI: IPI00011285.1 SWISS-PROT: P07384 TREMBL: B2RDI5 ENSEMBL: ENSP00000279247;ENSP00000431686;ENSP00000431984;ENSP00000434176;ENSP00000435272 REFSEQ: NP_001185797;NP_001185798;NP_005177 H-INV: HIT000321029 VEGA: OTTHUMP00000230448;OTTHUMP00000230452;OTTHUMP00000230453;OTTHUMP00000230454;OTTHUMP00000230461 Tax_Id=9606 Gene_Symbol=CAPN1 Calpain-1 catalytic subunit |
| 167 | IPI: IPI00011592.3 SWISS-PROT: O43237 TREMBL: B4DHD8 ENSEMBL: ENSP00000258198 REFSEQ: NP_006132 H-INV: HIT000063309 VEGA: OTTHUMP00000174820 Tax_Id=9606 Gene_Symbol=DYNC1L2 Cytoplasmic dynein 1 light intermediate chain 2                                                                                                                                                 |
| 168 | IPI: IPI00012837.1 SWISS-PROT: P33176 TREMBL: A8K048;D3DRX6;Q2TA90;Q66K46;Q6P164 ENSEMBL: ENSP00000307078 REFSEQ: NP_004512 H-INV: HIT000322766 VEGA: OTTHUMP00000019411 Tax_Id=9606 Gene_Symbol=KIF5B Kinesin-1 heavy chain                                                                                                                                                 |
| 169 | IPI: IPI00013219.1 SWISS-PROT: Q13418 ENSEMBL: ENSP00000299421;ENSP00000379975;ENSP00000403487 REFSEQ: NP_001014794;NP_001014795;NP_004508 H-INV: HIT000219709 VEGA: OTTHUMP00000164591;OTTHUMP00000229991;OTTHUMP00000229996 Tax_Id=9606 Gene_Symbol=ILK Integrin-linked protein kinase                                                                                     |
| 170 | IPI: IPI00015953.3 SWISS-PROT: Q9NR30-1 TREMBL: Q8NI92 ENSEMBL: ENSP00000346120 REFSEQ: NP_004719 H-INV: HIT000219764 VEGA: OTTHUMP00000019713 Tax_Id=9606 Gene_Symbol=DDX21 Isoform 1 of Nucleolar RNA helicase 2                                                                                                                                                           |
| 171 | IPI: IPI00016676.1 SWISS-PROT: Q15388 ENSEMBL: ENSP00000355566 REFSEQ: NP_055580 H-INV: HIT000042150 VEGA: OTTHUMP00000037593 Tax_Id=9606 Gene_Symbol=TOMM20 Mitochondrial import receptor subunit TOM20 homolog                                                                                                                                                             |
| 172 | IPI: IPI00017596.3 SWISS-PROT: Q15691 TREMBL: A2VCR0 ENSEMBL: ENSP00000364721 REFSEQ: NP_036457 H-INV: HIT000338429 VEGA: OTTHUMP00000030608 Tax_Id=9606 Gene_Symbol=MAPRE1 Microtubule-associated protein RP/EB family member 1                                                                                                                                             |
| 173 | IPI: IPI00017726.1 SWISS-PROT: Q99714-1 TREMBL: Q6IBS9 ENSEMBL: ENSP00000168216 REFSEQ: NP_004484 H-INV: HIT000222808 VEGA: OTTHUMP00000023348 Tax_Id=9606 Gene_Symbol=HSD17B10 Isoform 1 of 3-hydroxyacyl-CoA dehydrogenase type-2                                                                                                                                          |

|     |                                                                                                                                                                                                                                                                                                                                       |
|-----|---------------------------------------------------------------------------------------------------------------------------------------------------------------------------------------------------------------------------------------------------------------------------------------------------------------------------------------|
| 174 | IPI: IPI00018206.4 SWISS-PROT: P00505 TREMBL: A8K482;B3KUZ8 ENSEMBL: ENSP00000245206 REFSEQ: NP_002071 H-INV: HIT000194855 VEGA: OTTHUMP00000165254<br>Tax_Id=9606 Gene_Symbol=GOT2 Aspartate aminotransferase, mitochondrial                                                                                                         |
| 175 | IPI: IPI00021805.1 SWISS-PROT: P10620 TREMBL: Q6LET6 ENSEMBL: ENSP00000010404;ENSP00000379510;ENSP00000379512;ENSP00000379513 REFSEQ: NP_064696;NP_665707;NP_665734;NP_665735 H-INV: HIT000297756 VEGA: OTTHUMP00000239525;OTTHUMP00000239530 Tax_Id=9606 Gene_Symbol=MGST1 Microsomal glutathione S-transferase 1                    |
| 176 | IPI: IPI00025252.1 SWISS-PROT: P30101 ENSEMBL: ENSP00000300289 REFSEQ: NP_005304 H-INV: HIT000294181 VEGA: OTTHUMP00000041709 Tax_Id=9606<br>Gene_Symbol=PDIA3 Protein disulfide-isomerase A3                                                                                                                                         |
| 177 | IPI: IPI00025849.1 SWISS-PROT: P39687 TREMBL: Q08AJ6 ENSEMBL: ENSP00000417864 REFSEQ: NP_006296 H-INV: HIT000277640 VEGA: OTTHUMP00000205820<br>Tax_Id=9606 Gene_Symbol=ANP32A;ANP32AP1 Acidic leucine-rich nuclear phosphoprotein 32 family member A                                                                                 |
| 178 | IPI: IPI00027223.2 SWISS-PROT: O75874 TREMBL: B2R5M8;B4DXS4;Q0QER2;Q567U4;Q6FHQ6;Q6FI37;Q6FIA4 ENSEMBL: ENSP00000260985;ENSP00000390265;ENSP00000410513 REFSEQ: NP_005887 H-INV: HIT000287928 VEGA: OTTHUMP00000163870;OTTHUMP00000206464;OTTHUMP00000206466 Tax_Id=9606 Gene_Symbol=IDH1 Isocitrate dehydrogenase [NADP] cytoplasmic |
| 179 | IPI: IPI00028520.2 SWISS-PROT: P49821-1 TREMBL: E5KNH5;Q53G70 ENSEMBL: ENSP00000322450 REFSEQ: NP_009034 H-INV: HIT000001839 VEGA: OTTHUMP00000232178<br>Tax_Id=9606 Gene_Symbol=NDUFV1 Isoform 1 of NADH dehydrogenase [ubiquinone] flavoprotein 1, mitochondrial                                                                    |
| 180 | IPI: IPI00031691.1 SWISS-PROT: P32969 TREMBL: Q53Z07 ENSEMBL: ENSP00000346022;ENSP00000400467 REFSEQ: NP_000652;NP_001020092 H-INV: HIT000262209;HIT000284757 VEGA: OTTHUMP00000125205;OTTHUMP00000218426 Tax_Id=9606 Gene_Symbol=RPL9 60S ribosomal protein L9                                                                       |
| 181 | IPI: IPI00152688.1 SWISS-PROT: Q8TEA1 ENSEMBL: ENSP00000366519 REFSEQ: NP_872349 H-INV: HIT000051507 VEGA: OTTHUMP00000019261 Tax_Id=9606<br>Gene_Symbol=NSUN6 Putative methyltransferase NSUN6                                                                                                                                       |
| 182 | IPI: IPI00163187.10 SWISS-PROT: Q16658 TREMBL: B3KTA3;Q96IH1 ENSEMBL: ENSP00000371798 REFSEQ: NP_003079 H-INV: HIT000217481 VEGA: OTTHUMP00000115718<br>Tax_Id=9606 Gene_Symbol=FSCN1 Fascin                                                                                                                                          |
| 183 | IPI: IPI00172503.1 SWISS-PROT: P09919-2 TREMBL: Q6FH65 ENSEMBL: ENSP00000377705 REFSEQ: NP_757373 VEGA: OTTHUMP00000164327 Tax_Id=9606<br>Gene_Symbol=CSF3 Isoform Short of Granulocyte colony-stimulating factor                                                                                                                     |
| 184 | IPI: IPI00179964.5 SWISS-PROT: P26599-1 ENSEMBL: ENSP00000014112 REFSEQ: NP_114368 Tax_Id=9606 Gene_Symbol=PTBP1 Isoform 1 of Polypyrimidine tract-binding protein 1                                                                                                                                                                  |
| 185 | IPI: IPI00216320.1 SWISS-PROT: O00764-2 ENSEMBL: ENSP00000418359 VEGA: OTTHUMP00000109453 Tax_Id=9606 Gene_Symbol=PDXK Isoform 2 of Pyridoxal kinase                                                                                                                                                                                  |
| 186 | IPI: IPI00216691.5 SWISS-PROT: P07737 TREMBL: Q53Y44 ENSEMBL: ENSP00000225655 REFSEQ: NP_005013 H-INV: HIT000272364 VEGA: OTTHUMP00000125244<br>Tax_Id=9606 Gene_Symbol=PFN1 Profilin-1                                                                                                                                               |
| 187 | IPI: IPI00217852.6 SWISS-PROT: Q8IYS1 ENSEMBL: ENSP00000275072 REFSEQ: NP_001010853 H-INV: HIT000093649 VEGA: OTTHUMP00000016847 Tax_Id=9606<br>Gene_Symbol=PM20D2 Peptidase M20 domain-containing protein 2                                                                                                                          |
| 188 | IPI: IPI00218918.5 SWISS-PROT: P04083 TREMBL: B5BU38;Q05BR2;Q5TZZ9 ENSEMBL: ENSP00000257497;ENSP00000366109 REFSEQ: NP_000691 H-INV: HIT000280183 VEGA: OTTHUMP00000021474;OTTHUMP00000021475 Tax_Id=9606 Gene_Symbol=ANXA1 Annexin A1                                                                                                |
| 189 | IPI: IPI00219219.3 SWISS-PROT: P09382 TREMBL: Q15954 ENSEMBL: ENSP00000215909 REFSEQ: NP_002296 H-INV: HIT000267445 VEGA: OTTHUMP00000198176<br>Tax_Id=9606 Gene_Symbol=LGALS1 Galectin-1                                                                                                                                             |
| 190 | IPI: IPI00219604.3 SWISS-PROT: Q02750-1 TREMBL: A4QPA9;B4DFY5 ENSEMBL: ENSP00000302486 REFSEQ: NP_002746 H-INV: HIT000192051 VEGA: OTTHUMP00000164252<br>Tax_Id=9606 Gene_Symbol=MAP2K1 Isoform 1 of Dual specificity mitogen-activated protein kinase kinase 1                                                                       |
| 191 | IPI: IPI00220219.6 SWISS-PROT: P35606 ENSEMBL: ENSP00000329419 REFSEQ: NP_004757 H-INV: HIT000029520 VEGA: OTTHUMP00000217144 Tax_Id=9606<br>Gene_Symbol=COPB2 Coatomer subunit beta'                                                                                                                                                 |
| 192 | IPI: IPI00220301.5 SWISS-PROT: P30041 TREMBL: A4UCS6 ENSEMBL: ENSP00000342026 REFSEQ: NP_004896 H-INV: HIT000283339 VEGA: OTTHUMP00000032693<br>Tax_Id=9606 Gene_Symbol=PRDX6 Peroxiredoxin-6                                                                                                                                         |
| 193 | IPI: IPI00289499.3 SWISS-PROT: P31939 TREMBL: A8K202;B2R7P8 ENSEMBL: ENSP00000236959 REFSEQ: NP_004035 H-INV: HIT000285218 VEGA: OTTHUMP00000163981<br>Tax_Id=9606 Gene_Symbol=ATIC Bifunctional purine biosynthesis protein PURH                                                                                                     |

|     |                                                                                                                                                                                                                                                                        |
|-----|------------------------------------------------------------------------------------------------------------------------------------------------------------------------------------------------------------------------------------------------------------------------|
| 194 | IPI:IP100304082.8 SWISS-PROT:Q96CN7 ENSEMBL:ENSP00000173527 REFSEQ:NP_057132 H-INV:HIT000036522 VEGA:OTTHUMP00000223219 Tax_Id=9606 Gene_Symbol=ISOC1 Isochorismatase domain-containing protein 1                                                                      |
| 195 | IPI:IP100328840.9 TREMBL:E9PB61 ENSEMBL:ENSP00000421592 REFSEQ:NP_005773 H-INV:HIT000053776 VEGA:OTTHUMP00000218275 Tax_Id=9606 Gene_Symbol=THOC4 THO complex subunit 4                                                                                                |
| 196 | IPI:IP100332950.5 SWISS-PROT:Q9NR50-3 Tax_Id=9606 Gene_Symbol=EIF2B3 Isoform 3 of Translation initiation factor eIF-2B subunit gamma                                                                                                                                   |
| 197 | IPI:IP100334291.9 TREMBL:B3KPH8;B3KU28;B3KXS5;B4DPX0;Q2VPA0;Q8N8K8 ENSEMBL:ENSP00000351177 Tax_Id=9606 Gene_Symbol=LONP1 Lon protease homolog                                                                                                                          |
| 198 | IPI:IP100339274.5 SWISS-PROT:Q16777 ENSEMBL:ENSP00000332194 REFSEQ:NP_003508 H-INV:HIT000260048 VEGA:OTTHUMP00000033967 Tax_Id=9606 Gene_Symbol=HIST2H2AC Histone H2A type 2-C                                                                                         |
| 199 | IPI:IP100375145.1 SWISS-PROT:P45974-2 ENSEMBL:ENSP00000373883 REFSEQ:NP_003472 VEGA:OTTHUMP00000240482 Tax_Id=9606 Gene_Symbol=USP5 Isoform Short of Ubiquitin carboxyl-terminal hydrolase 5                                                                           |
| 200 | IPI:IP100386354.3 TREMBL:Q9H7Z5 Tax_Id=9606 Gene_Symbol=ARPC4;ARPC4-TTL3 cDNA FLJ14048 fis, clone HEMBA1006650, weakly similar to ARP2/3 COMPLEX 20 KD SUBUNIT                                                                                                         |
| 201 | IPI:IP100395605.4 SWISS-PROT:Q92888-3 ENSEMBL:ENSP00000337261 REFSEQ:NP_945353 H-INV:HIT000042038 Tax_Id=9606 Gene_Symbol=ARHGEF1 Isoform 3 of Rho guanine nucleotide exchange factor 1                                                                                |
| 202 | IPI:IP100395769.2 SWISS-PROT:P36542-2 TREMBL:B4DFE6 ENSEMBL:ENSP00000338568 REFSEQ:NP_005165 VEGA:OTTHUMP00000019069 Tax_Id=9606 Gene_Symbol=ATP5C1 Isoform Heart of ATP synthase subunit gamma, mitochondrial                                                         |
| 203 | IPI:IP100396378.3 SWISS-PROT:P22626-1 ENSEMBL:ENSP00000346694;ENSP00000354021 REFSEQ:NP_112533 H-INV:HIT000195300 VEGA:OTTHUMP00000122511;OTTHUMP00000202466 Tax_Id=9606 Gene_Symbol=HNRNPA2B1 Isoform B1 of Heterogeneous nuclear ribonucleoproteins A2/B1            |
| 204 | IPI:IP100398625.5 SWISS-PROT:Q86YZ3 TREMBL:Q5DT20;Q5W8V9 ENSEMBL:ENSP00000357791 REFSEQ:NP_001009931 H-INV:HIT000331814 VEGA:OTTHUMP00000014118 Tax_Id=9606 Gene_Symbol=HRNR Hornerin                                                                                  |
| 205 | IPI:IP100440689.1 SWISS-PROT:Q9BY77-2 ENSEMBL:ENSP00000252116 REFSEQ:NP_835237 VEGA:OTTHUMP00000198659 Tax_Id=9606 Gene_Symbol=POLDIP3 Isoform 2 of Polymerase delta-interacting protein 3                                                                             |
| 206 | IPI:IP100478657.4 SWISS-PROT:Q12849 ENSEMBL:ENSP00000254799 REFSEQ:NP_002083 VEGA:OTTHUMP00000219148 Tax_Id=9606 Gene_Symbol=GRSF1 G-rich sequence factor 1                                                                                                            |
| 207 | IPI:IP100549761.3 SWISS-PROT:Q9BT22 ENSEMBL:ENSP00000262374 REFSEQ:NP_061982 H-INV:HIT000082408 VEGA:OTTHUMP00000159923 Tax_Id=9606 Gene_Symbol=ALG1 Chitobiosyldiphosphodolichol beta-mannosyltransferase                                                             |
| 208 | IPI:IP100550682.1 TREMBL:Q5M7Z5 Tax_Id=9606 Gene_Symbol=GRHPR GRHPR protein (Fragment)                                                                                                                                                                                 |
| 209 | IPI:IP100554711.3 SWISS-PROT:P14923 TREMBL:Q7KZ86 ENSEMBL:ENSP00000311113;ENSP00000377507;ENSP00000377508 REFSEQ:NP_002221;NP_068831 H-INV:HIT000327559 VEGA:OTTHUMP00000164732;OTTHUMP00000164735;OTTHUMP00000164738 Tax_Id=9606 Gene_Symbol=JUP Junction plakoglobin |
| 210 | IPI:IP100641299.3 TREMBL:B1ANR5 ENSEMBL:ENSP00000408559 VEGA:OTTHUMP00000035395 Tax_Id=9606 Gene_Symbol=PABPC4 Poly(A) binding protein, cytoplasmic 4                                                                                                                  |
| 211 | IPI:IP100642454.1 TREMBL:Q5T8U2;Q9BY74 ENSEMBL:ENSP00000361071 VEGA:OTTHUMP00000022468 Tax_Id=9606 Gene_Symbol=RPL7A;SNORD24 Uncharacterized protein                                                                                                                   |
| 212 | IPI:IP100644531.1 ENSEMBL:ENSP00000412429 VEGA:OTTHUMP00000024410 Tax_Id=9606 Gene_Symbol=TAGLN2 21 kDa protein                                                                                                                                                        |
| 213 | IPI:IP100646839.1 TREMBL:B5ME19;F5GZ22 ENSEMBL:ENSP00000370258;ENSP00000381916;ENSP00000381917 REFSEQ:NP_001093131 VEGA:OTTHUMP00000122518 Tax_Id=9606 Gene_Symbol=EIF3C;EIF3CL Uncharacterized protein                                                                |
| 214 | IPI:IP100647556.2 TREMBL:B7Z373;B7Z5V1;Q5T0I1;Q69YR8 ENSEMBL:ENSP00000377882;ENSP00000410657;ENSP00000411293 REFSEQ:NP_001121138;NP_001121139 VEGA:OTTHUMP00000022013 Tax_Id=9606 Gene_Symbol=GSN gelsolin isoform c                                                   |
| 215 | IPI:IP100647942.1 TREMBL:A6NHK2 ENSEMBL:ENSP00000356176 VEGA:OTTHUMP00000038680 Tax_Id=9606 Gene_Symbol=SNRPE Uncharacterized protein                                                                                                                                  |
| 216 | IPI:IP100740636.1 TREMBL:Q2KJU6 ENSEMBL:ENSP00000378383 Tax_Id=9606 Gene_Symbol=TRAF4 Uncharacterized protein                                                                                                                                                          |
| 217 | IPI:IP100791854.1 TREMBL:A8MXN1 ENSEMBL:ENSP00000378865 VEGA:OTTHUMP00000178792 Tax_Id=9606 Gene_Symbol=REEP6 Uncharacterized protein                                                                                                                                  |

|     |                                                                                                                                                                                                                                         |
|-----|-----------------------------------------------------------------------------------------------------------------------------------------------------------------------------------------------------------------------------------------|
| 218 | IPI: IPI00794746.1 TREMBL:A8MUD9 ENSEMBL:ENSP00000379729;ENSP00000379730;ENSP00000379731 VEGA:OTTHUMP00000166003;OTTHUMP00000166004;OTTHUMP00000166005 Tax_Id=9606 Gene_Symbol=RPL7P32;RPL7 Uncharacterized protein                     |
| 219 | IPI: IPI00794777.1 TREMBL:A6NIW5 ENSEMBL:ENSP00000334063 VEGA:OTTHUMP00000165825 Tax_Id=9606 Gene_Symbol=PRDX2 Uncharacterized protein                                                                                                  |
| 220 | IPI: IPI00798041.5 TREMBL:B4E1T7;Q56VW8 ENSEMBL:ENSP00000325074 REFSEQ:NP_001171062 VEGA:OTTHUMP00000225160 Tax_Id=9606 Gene_Symbol=PPP2R2A serine/threonine-protein phosphatase 2A 55 kDa regulatory subunit B alpha isoform isoform 2 |
| 221 | IPI: IPI00827717.2 SWISS-PROT:Q13557-3 ENSEMBL:ENSP00000378034;ENSP00000423482 VEGA:OTTHUMP00000220386 Tax_Id=9606 Gene_Symbol=CAMK2D Isoform Delta 3 of Calcium/calmodulin-dependent protein kinase type II subunit delta              |
| 222 | IPI: IPI00829697.1 ENSEMBL:ENSP00000375030 VEGA:OTTHUMP00000201155 Tax_Id=9606 Gene_Symbol=- 13 kDa protein                                                                                                                             |
| 223 | IPI: IPI00844578.1 SWISS-PROT:Q08211 TREMBL:B3KU66;Q12803;Q32Q22;Q6PK6 ENSEMBL:ENSP00000356520 REFSEQ:NP_001348 H-INV:HIT000385232 VEGA:OTTHUMP00000033287 Tax_Id=9606 Gene_Symbol=DHX9 ATP-dependent RNA helicase A                    |
| 224 | IPI: IPI00848328.1 H-INV:HIT000332638 Tax_Id=9606 Gene_Symbol=- Similar to Peroxisomal enoyl-coenzyme A hydratase-like protein                                                                                                          |
| 225 | IPI: IPI00852973.2 SWISS-PROT:Q6ZJN1-2 ENSEMBL:ENSP00000292309;ENSP00000410405 VEGA:OTTHUMP00000209977 Tax_Id=9606 Gene_Symbol=NBEAL2 Isoform 2 of Neurobeachin-like protein 2                                                          |
| 226 | IPI: IPI00872163.1 TREMBL:Q8N3X5 ENSEMBL:ENSP00000378876 Tax_Id=9606 Gene_Symbol=ATP2A1 Similar to ATPase, Ca++ transporting, cardiac muscle, fast twitch 1 (Fragment)                                                                  |
| 227 | IPI: IPI00872684.2 TREMBL:B7Z437;B7Z5V2;B7Z9R6;E7EQR4;Q9UJZ2;Q9UJZ6;Q9UJZ7;Q9UJZ8;Q9UK20 ENSEMBL:ENSP00000376016 Tax_Id=9606 Gene_Symbol=EZR cDNA FLJ54141, highly similar to Ezrin                                                     |
| 228 | IPI: IPI00878160.1 TREMBL:B5MCT7 ENSEMBL:ENSP00000384715;ENSP00000384930 VEGA:OTTHUMP00000198594 Tax_Id=9606 Gene_Symbol=PPM1F Uncharacterized protein                                                                                  |
| 229 | IPI: IPI00889196.2 SWISS-PROT:P0C7P4 H-INV:HIT000271620 Tax_Id=9606 Gene_Symbol=UQCRFS1P1 Putative cytochrome b-c1 complex subunit Rieske-like protein 1                                                                                |
| 230 | IPI: IPI00890827.1 SWISS-PROT:O00743-2 ENSEMBL:ENSP00000411744 REFSEQ:NP_001116841 Tax_Id=9606 Gene_Symbol=PPP6C Isoform 2 of Serine/threonine-protein phosphatase 6 catalytic subunit                                                  |
| 231 | IPI: IPI00893993.1 TREMBL:F8W950 ENSEMBL:ENSP00000378658 VEGA:OTTHUMP00000201311 Tax_Id=9606 Gene_Symbol=AIMP2 Uncharacterized protein                                                                                                  |
| 232 | IPI: IPI00908449.1 TREMBL:B4DW90;E7EUT8 ENSEMBL:ENSP00000392027 Tax_Id=9606 Gene_Symbol=SF3A3 cDNA FLJ58737, highly similar to Splicing factor 3A subunit 3                                                                             |
| 233 | IPI: IPI00909525.1 TREMBL:B4DP28 Tax_Id=9606 Gene_Symbol=POLD2 cDNA FLJ51260, highly similar to DNA polymerase subunit delta 2                                                                                                          |
| 234 | IPI: IPI00910019.3 TREMBL:B4DP93;E9PHL5 Tax_Id=9606 Gene_Symbol=MVP Uncharacterized protein                                                                                                                                             |
| 235 | IPI: IPI00914059.3 TREMBL:B5LY69 Tax_Id=9606 Gene_Symbol=- Uridine monophosphate synthetase isoform G                                                                                                                                   |
| 236 | IPI: IPI00916600.1 TREMBL:E7EMB3 ENSEMBL:ENSP00000387065 VEGA:OTTHUMP00000202342 Tax_Id=9606 Gene_Symbol=CALM3;CALM2;CALM1 Uncharacterized                                                                                              |
| 237 | IPI: IPI00922367.1 TREMBL:F5GYZ3 ENSEMBL:ENSP00000441364 REFSEQ:NP_001138882 Tax_Id=9606 Gene_Symbol=NONO non-POU domain-containing octamer-binding protein isoform 2                                                                   |
| 238 | IPI: IPI00922390.1 TREMBL:B4DI59 Tax_Id=9606 Gene_Symbol=- cDNA FLJ59527                                                                                                                                                                |
| 239 | IPI: IPI00926183.1 TREMBL:C9J0D1 ENSEMBL:ENSP00000406901 VEGA:OTTHUMP00000208720 Tax_Id=9606 Gene_Symbol=H2AFV Histone H2A                                                                                                              |
| 240 | IPI: IPI00930174.1 TREMBL:B4DLA9 ENSEMBL:ENSP00000445831 REFSEQ:NP_001154806 Tax_Id=9606 Gene_Symbol=HIST2H2BF histone H2B type 2-F isoform b                                                                                           |
| 241 | IPI: IPI00943329.2 ENSEMBL:ENSP00000370973 Tax_Id=9606 Gene_Symbol=TNNT3 31 kDa protein                                                                                                                                                 |
| 242 | IPI: IPI00964070.1 TREMBL:D6RA82 ENSEMBL:ENSP00000421015;ENSP00000423068 VEGA:OTTHUMP00000219237;OTTHUMP00000219238 Tax_Id=9606 Gene_Symbol=ANXA3 Uncharacterized protein                                                               |
| 243 | IPI: IPI00966986.1 TREMBL:D6RD47 ENSEMBL:ENSP00000425865;ENSP00000427043 VEGA:OTTHUMP00000222334;OTTHUMP00000222652 Tax_Id=9606 Gene_Symbol=RPS23 Uncharacterized protein                                                               |
| 244 | IPI: IPI00973775.1 TREMBL:E5RJTO ENSEMBL:ENSP00000428195 VEGA:OTTHUMP00000227894 Tax_Id=9606 Gene_Symbol=EIF3H Uncharacterized protein                                                                                                  |

|       |     |                                                                                                                                                                                                                                                                                                                                                                                                                                                                         |
|-------|-----|-------------------------------------------------------------------------------------------------------------------------------------------------------------------------------------------------------------------------------------------------------------------------------------------------------------------------------------------------------------------------------------------------------------------------------------------------------------------------|
|       | 245 | IPI: IPI00975492.1 ENSEMBL: ENSP00000433204 VEGA: OTTHUMP00000233042 Tax_Id=9606 Gene_Symbol=PDHX Protein                                                                                                                                                                                                                                                                                                                                                               |
|       | 246 | IPI: IPI00976543.1 TREMBL: A8DPS6 ENSEMBL: ENSP00000434951 REFSEQ: NP_001171676 VEGA: OTTHUMP00000234981 Tax_Id=9606 Gene_Symbol=PAFAH1B2 platelet-activating factor acetylhydrolase IB subunit beta isoform c                                                                                                                                                                                                                                                          |
|       | 247 | IPI: IPI00977430.1 TREMBL: B4DUR8 ENSEMBL: ENSP00000357244; ENSP00000431543 VEGA: OTTHUMP00000231497 Tax_Id=9606 Gene_Symbol=CCT3 cDNA, FLJ79286, highly similar to T-complex protein 1 subunit gamma                                                                                                                                                                                                                                                                   |
|       | 248 | IPI: IPI00978005.1 TREMBL: B4E283 ENSEMBL: ENSP00000399341 VEGA: OTTHUMP00000232791 Tax_Id=9606 Gene_Symbol=API5 cDNA FLJ51754, highly similar to Apoptosis inhibitor 5                                                                                                                                                                                                                                                                                                 |
|       | 249 | IPI: IPI00978387.1 TREMBL: E9PLK3 ENSEMBL: ENSP00000433287 VEGA: OTTHUMP00000229852 Tax_Id=9606 Gene_Symbol=NPEPPS Uncharacterized protein                                                                                                                                                                                                                                                                                                                              |
|       | 250 | IPI: IPI00979499.1 TREMBL: B4DRA1; E7EVZ4 ENSEMBL: ENSP00000404568 REFSEQ: NP_001186872 Tax_Id=9606 Gene_Symbol=SH3GL1 endophilin-A2 isoform 2                                                                                                                                                                                                                                                                                                                          |
|       | 251 | IPI: IPI00979595.1 TREMBL: E9PQD7 ENSEMBL: ENSP00000436865 VEGA: OTTHUMP00000231872 Tax_Id=9606 Gene_Symbol=RPS2 Uncharacterized protein                                                                                                                                                                                                                                                                                                                                |
|       | 252 | IPI: IPI00983309.1 TREMBL: E9PNQ1 ENSEMBL: ENSP00000432820 VEGA: OTTHUMP00000231295 Tax_Id=9606 Gene_Symbol=STT3A Uncharacterized protein                                                                                                                                                                                                                                                                                                                               |
|       | 253 | IPI: IPI01009588.1 SWISS-PROT: Q15063-3 ENSEMBL: ENSP00000437959 REFSEQ: NP_001129407 Tax_Id=9606 Gene_Symbol=POSTN Isoform 3 of Periostin                                                                                                                                                                                                                                                                                                                              |
|       | 254 | IPI: IPI01012384.1 ENSEMBL: ENSP00000419764 VEGA: OTTHUMP00000214877 Tax_Id=9606 Gene_Symbol=IPO5 Protein                                                                                                                                                                                                                                                                                                                                                               |
|       | 255 | IPI: IPI00009032.1 SWISS-PROT: P05455 TREMBL: B5BUB5; Q14730; Q9UMH5 ENSEMBL: ENSP00000260956; ENSP00000386636 REFSEQ: NP_003133 H-INV: HIT000288232 VEGA: OTTHUMP00000163067; OTTHUMP00000204778 Tax_Id=9606 Gene_Symbol=SSB Lupus La protein                                                                                                                                                                                                                          |
|       | 256 | IPI: IPI01022306.1 TREMBL: F8W646 ENSEMBL: ENSP00000448229 Tax_Id=9606 Gene_Symbol=HNRNPA1 Uncharacterized protein                                                                                                                                                                                                                                                                                                                                                      |
| Band2 | 1   | IPI: IPI00032905.3 SWISS-PROT: Q9H267 TREMBL: B7Z1N4; B7Z6M7 ENSEMBL: ENSP00000327650 REFSEQ: NP_061138 H-INV: HIT000076960 VEGA: OTTHUMP00000194751 Tax_Id=9606 Gene_Symbol=VPS33B Vacuolar protein sorting-associated protein 33B                                                                                                                                                                                                                                     |
|       | 2   | IPI: IPI00550021.4 SWISS-PROT: P39023 TREMBL: Q96QL0 ENSEMBL: ENSP00000346001 REFSEQ: NP_000958 H-INV: HIT000338841 VEGA: OTTHUMP00000199074 Tax_Id=9606 Gene_Symbol=SNORD43; RPL3 60S ribosomal protein L3                                                                                                                                                                                                                                                             |
|       | 3   | IPI: IPI01019113.1 SWISS-PROT: P07437 TREMBL: Q5SU16; Q6LC01 ENSEMBL: ENSP00000339001; ENSP00000373058; ENSP00000399155; ENSP00000400663; ENSP00000401317; ENSP00000406811; ENSP00000410071; ENSP00000410829 REFSEQ: NP_821133 H-INV: HIT000038721 VEGA: OTTHUMP00000014646; OTTHUMP00000029069; OTTHUMP00000029477; OTTHUMP00000165122; OTTHUMP00000192963; OTTHUMP00000193218; OTTHUMP00000193677; OTTHUMP00000194048 Tax_Id=9606 Gene_Symbol=TUBB Tubulin beta chain |
|       | 4   | IPI: IPI00007752.1 SWISS-PROT: P68371 TREMBL: Q8IWP6; Q8IZ29; Q8N6N5; Q96HX0 ENSEMBL: ENSP00000341289 REFSEQ: NP_006079 H-INV: HIT000009868 VEGA: OTTHUMP00000162590 Tax_Id=9606 Gene_Symbol=TUBB2C Tubulin beta-2C chain                                                                                                                                                                                                                                               |
|       | 5   | IPI: IPI00025491.1 SWISS-PROT: P60842 TREMBL: A8K088; A8K7F6; B4DNH2; Q9NZR9 ENSEMBL: ENSP00000293831 REFSEQ: NP_001407 H-INV: HIT000281563; HIT000333951 VEGA: OTTHUMP00000135288 Tax_Id=9606 Gene_Symbol=EIF4A1 Eukaryotic initiation factor 4A-I                                                                                                                                                                                                                     |
|       | 6   | IPI: IPI00027107.5 SWISS-PROT: P49411 ENSEMBL: ENSP00000322439 REFSEQ: NP_003312 H-INV: HIT000034759 VEGA: OTTHUMP00000122539 Tax_Id=9606 Gene_Symbol=TUFM elongation factor Tu, mitochondrial precursor                                                                                                                                                                                                                                                                |
|       | 7   | IPI: IPI00930715.1 TREMBL: B2R6L0 Tax_Id=9606 Gene_Symbol=TUBB2A cDNA, FLJ93005, highly similar to Homo sapiens tubulin, beta polypeptide (TUBB), mRNA                                                                                                                                                                                                                                                                                                                  |
|       | 8   | IPI: IPI00930688.1 SWISS-PROT: P68363 TREMBL: A8JZY9; B3KPS3; B3KT06 ENSEMBL: ENSP00000336799 REFSEQ: NP_006073 H-INV: HIT000291174 Tax_Id=9606 Gene_Symbol=TUBA1B Tubulin alpha-1B chain                                                                                                                                                                                                                                                                               |
|       | 9   | IPI: IPI00180675.4 SWISS-PROT: Q71U36 ENSEMBL: ENSP00000301071; ENSP00000439020 REFSEQ: NP_006000 H-INV: HIT000272358 Tax_Id=9606 Gene_Symbol=TUBA1A Tubulin alpha-1A chain                                                                                                                                                                                                                                                                                             |
|       | 10  | IPI: IPI00218343.4 SWISS-PROT: Q9BQE3 ENSEMBL: ENSP00000301072 REFSEQ: NP_116093 H-INV: HIT000279007 Tax_Id=9606 Gene_Symbol=TUBA1C Tubulin alpha-1C chain                                                                                                                                                                                                                                                                                                              |
|       | 11  | IPI: IPI00021439.1 SWISS-PROT: P60709 TREMBL: Q1KLZ0; Q53G76; Q53G99; Q53GK6; Q8WVW5 ENSEMBL: ENSP00000349960 REFSEQ: NP_001092 H-INV: HIT000276298 VEGA: OTTHUMP00000024886 Tax_Id=9606 Gene_Symbol=ACTB Actin, cytoplasmic 1                                                                                                                                                                                                                                          |
|       | 12  | IPI: IPI00023598.2 SWISS-PROT: P04350 TREMBL: B4DE77 ENSEMBL: ENSP00000264071; ENSP00000443590 REFSEQ: NP_006078 H-INV: HIT000036323 Tax_Id=9606 Gene_Symbol=TUBB4 Tubulin beta-4 chain                                                                                                                                                                                                                                                                                 |

|  |    |                                                                                                                                                                                                                                        |
|--|----|----------------------------------------------------------------------------------------------------------------------------------------------------------------------------------------------------------------------------------------|
|  | 13 | IPI:UPI00026606.2 SWISS-PROT:O75683 TREMBL:B3KNS8 ENSEMBL:ENSP00000361092 REFSEQ:NP_006744 H-INV:HIT000032661 VEGA:OTTHUMP00000022488<br>Tax_Id=9606 Gene_Symbol=SURF6 Surfeit locus protein 6                                         |
|  | 14 | IPI:UPI00003918.6 SWISS-PROT:P36578 TREMBL:B4DFI6;Q53G74;Q59GY2 ENSEMBL:ENSP00000311430 REFSEQ:NP_000959 H-INV:HIT000304287 VEGA:OTTHUMP00000164249 Tax_Id=9606 Gene_Symbol=RPL4 60S ribosomal protein L4                              |
|  | 15 | IPI:UPI00472724.1 SWISS-PROT:Q5VTE0 H-INV:HIT000294489 Tax_Id=9606 Gene_Symbol=EEF1A1P5;EEF1A1 Putative elongation factor 1-alpha-like 3                                                                                               |
|  | 16 | IPI:UPI00009328.4 SWISS-PROT:P38919 ENSEMBL:ENSP00000269349 REFSEQ:NP_055555 H-INV:HIT000281989 Tax_Id=9606 Gene_Symbol=EIF4A3 Eukaryotic initiation factor 4A-III                                                                     |
|  | 17 | IPI:UPI00465248.5 SWISS-PROT:P06733-1 TREMBL:A4UCS8 ENSEMBL:ENSP00000234590 REFSEQ:NP_001419 H-INV:HIT000270987 VEGA:OTTHUMP00000001706<br>Tax_Id=9606 Gene_Symbol=ENO1 Isoform alpha-enolase of Alpha-enolase                         |
|  | 18 | IPI:UPI00303476.1 SWISS-PROT:P06576 TREMBL:Q0QEN7 ENSEMBL:ENSP00000262030 REFSEQ:NP_001677 H-INV:HIT000279396 Tax_Id=9606 Gene_Symbol=ATP5B ATP synthase subunit beta, mitochondrial                                                   |
|  | 19 | IPI:UPI00021435.3 SWISS-PROT:P35998 TREMBL:B7Z571;Q75L23 ENSEMBL:ENSP00000292644;ENSP00000391211 REFSEQ:NP_002794 H-INV:HIT000031017 VEGA:OTTHUMP00000211710 Tax_Id=9606 Gene_Symbol=PSMC2 26S protease regulatory subunit 7           |
|  | 20 | IPI:UPI00031812.3 SWISS-PROT:P67809 TREMBL:A0JLU4;Q05D43;Q6PKI6 ENSEMBL:ENSP00000361626 REFSEQ:NP_004550 H-INV:HIT000305396 VEGA:OTTHUMP00000008731 Tax_Id=9606 Gene_Symbol=YBX1 Nuclease-sensitive element-binding protein 1          |
|  | 21 | IPI:UPI00937615.2 SWISS-PROT:P26641 TREMBL:B4DSR4;Q2F838;Q2F840;Q53YD7 ENSEMBL:ENSP00000331901 REFSEQ:NP_001395 H-INV:HIT000049297 VEGA:OTTHUMP00000236167 Tax_Id=9606 Gene_Symbol=EEF1G Elongation factor 1-gamma                     |
|  | 22 | IPI:UPI00013683.2 SWISS-PROT:Q13509 ENSEMBL:ENSP00000320295;ENSP00000452381 REFSEQ:NP_006077 H-INV:HIT000277220 VEGA:OTTHUMP00000176846<br>Tax_Id=9606 Gene_Symbol=TUBB3;MC1R Tubulin beta-3 chain                                     |
|  | 23 | IPI:UPI00409717.1 SWISS-PROT:Q14240-2 ENSEMBL:ENSP00000398370 VEGA:OTTHUMP00000210101 Tax_Id=9606<br>Gene_Symbol=MIR1248;SNORA4;SNORD2;EIF4A2;SNORA81;SNORA63 Isoform 2 of Eukaryotic initiation factor 4A-II                          |
|  | 24 | IPI:UPI00003505.3 SWISS-PROT:Q15645-1 ENSEMBL:ENSP00000166345 REFSEQ:NP_004228 H-INV:HIT000029592 VEGA:OTTHUMP00000115407 Tax_Id=9606<br>Gene_Symbol=TRIP13 Isoform 1 of Pachytene checkpoint protein 2 homolog                        |
|  | 25 | IPI:UPI00023919.4 SWISS-PROT:P62195 ENSEMBL:ENSP00000310572 REFSEQ:NP_002796 H-INV:HIT000289771 Tax_Id=9606 Gene_Symbol=PSMC5 26S protease regulatory subunit 8                                                                        |
|  | 26 | IPI:UPI00792478.1 TREMBL:B3KPW9 ENSEMBL:ENSP00000318575 REFSEQ:NP_001180343 VEGA:OTTHUMP00000196217 Tax_Id=9606 Gene_Symbol=TUBA8 tubulin alpha-8 chain isoform 2                                                                      |
|  | 27 | IPI:UPI00295081.1 SWISS-PROT:P23258 ENSEMBL:ENSP00000251413 REFSEQ:NP_001061 H-INV:HIT000029781 Tax_Id=9606 Gene_Symbol=TUBG1 Tubulin gamma-1 chain                                                                                    |
|  | 28 | IPI:UPI00013068.1 SWISS-PROT:P60228 TREMBL:B2R806;B3KW56;Q6IAX5 ENSEMBL:ENSP00000220849 REFSEQ:NP_001559 H-INV:HIT000294580 VEGA:OTTHUMP00000227726 Tax_Id=9606 Gene_Symbol=EIF3E Eukaryotic translation initiation factor 3 subunit E |
|  | 29 | IPI:UPI00414384.1 SWISS-PROT:Q6YN16-1 ENSEMBL:ENSP00000381785 REFSEQ:NP_115679 H-INV:HIT000250697 VEGA:OTTHUMP00000021935 Tax_Id=9606<br>Gene_Symbol=HSDL2 Isoform 1 of Hydroxysteroid dehydrogenase-like protein 2                    |
|  | 30 | IPI:UPI00930343.1 TREMBL:A8K3K1 Tax_Id=9606 Gene_Symbol=ACTC1 cDNA FLJ78096, highly similar to Homo sapiens actin, alpha, cardiac muscle (ACTC), mRNA                                                                                  |
|  | 31 | IPI:UPI00012535.1 SWISS-PROT:P31689 TREMBL:Q5T7Q0;Q86TL9 ENSEMBL:ENSP00000369127 REFSEQ:NP_001530 H-INV:HIT000020396 VEGA:OTTHUMP00000021193<br>Tax_Id=9606 Gene_Symbol=DNAJA1 DnaJ homolog subfamily A member 1                       |
|  | 32 | IPI:UPI00975690.1 TREMBL:BOYJC4;B3KRK8;F5H288 ENSEMBL:ENSP00000435613;ENSP00000439432 VEGA:OTTHUMP00000019225 Tax_Id=9606 Gene_Symbol=VIM<br>Vimentin variant 3                                                                        |
|  | 33 | IPI:UPI00440493.2 SWISS-PROT:P25705 ENSEMBL:ENSP00000282050;ENSP00000381736 REFSEQ:NP_001001937;NP_004037 H-INV:HIT000049010 VEGA:OTTHUMP00000163475 Tax_Id=9606 Gene_Symbol=ATP5A1 ATP synthase subunit alpha, mitochondrial          |
|  | 34 | IPI:UPI00003783.1 SWISS-PROT:P36507 TREMBL:Q7Z370 ENSEMBL:ENSP00000262948 REFSEQ:NP_109587 H-INV:HIT000029656 VEGA:OTTHUMP00000165826<br>Tax_Id=9606 Gene_Symbol=MAP2K2 Dual specificity mitogen-activated protein kinase kinase 2     |

|    |                                                                                                                                                                                                                                                                                                                                                                                                     |
|----|-----------------------------------------------------------------------------------------------------------------------------------------------------------------------------------------------------------------------------------------------------------------------------------------------------------------------------------------------------------------------------------------------------|
| 35 | IPI: IPI00022793.5 SWISS-PROT: P55084 TREMBL: B4DY96 ENSEMBL: ENSP00000325136 REFSEQ: NP_000174 H-INV: HIT000100599 VEGA: OTTHUMP00000122456<br>Tax_Id=9606 Gene_Symbol=HADHB Trifunctional enzyme subunit beta, mitochondrial                                                                                                                                                                      |
| 36 | IPI: IPI01019005.1 SWISS-PROT: Q9UBB4 ENSEMBL: ENSP00000252934 REFSEQ: NP_037368 H-INV: HIT000271035 VEGA: OTTHUMP00000197383 Tax_Id=9606<br>Gene_Symbol=ATXN10 Ataxin-10                                                                                                                                                                                                                           |
| 37 | IPI: IPI00014424.1 SWISS-PROT: Q05639 ENSEMBL: ENSP00000217182; ENSP00000298049 REFSEQ: NP_001949 H-INV: HIT000386552 VEGA: OTTHUMP00000031776<br>Tax_Id=9606 Gene_Symbol=EEF1A2 Elongation factor 1-alpha 2                                                                                                                                                                                        |
| 38 | IPI: IPI00398777.3 SWISS-PROT: Q15149-5 TREMBL: Q8WXV5 ENSEMBL: ENSP00000346602 REFSEQ: NP_958784 VEGA: OTTHUMP00000229282 Tax_Id=9606<br>Gene_Symbol=PLEC Isoform 5 of Plectin                                                                                                                                                                                                                     |
| 39 | IPI: IPI00015838.3 SWISS-PROT: Q9NX58 TREMBL: A8K3Y5 ENSEMBL: ENSP00000345917; ENSP00000397367 REFSEQ: NP_001139197; NP_060286 H-<br>INV: HIT000288690 VEGA: OTTHUMP00000155128 Tax_Id=9606 Gene_Symbol=LYAR Cell growth-regulating nucleolar protein                                                                                                                                               |
| 40 | IPI: IPI00219604.3 SWISS-PROT: Q02750-1 TREMBL: A4QPA9; B4DFY5 ENSEMBL: ENSP00000302486 REFSEQ: NP_002746 H-INV: HIT000192051 VEGA: OTTHUMP00000164252<br>Tax_Id=9606 Gene_Symbol=MAP2K1 Isoform 1 of Dual specificity mitogen-activated protein kinase kinase 1                                                                                                                                    |
| 41 | IPI: IPI00028520.2 SWISS-PROT: P49821-1 TREMBL: E5KNH5; Q53G70 ENSEMBL: ENSP00000322450 REFSEQ: NP_009034 H-INV: HIT000001839 VEGA: OTTHUMP00000232178<br>Tax_Id=9606 Gene_Symbol=NDUFV1 Isoform 1 of NADH dehydrogenase [ubiquinone] flavoprotein 1, mitochondrial                                                                                                                                 |
| 42 | IPI: IPI00106698.2 SWISS-PROT: Q9BRX2 TREMBL: B3KPC1 ENSEMBL: ENSP00000274311 REFSEQ: NP_057030 H-INV: HIT000084484 VEGA: OTTHUMP00000122446<br>Tax_Id=9606 Gene_Symbol=PELO Protein pelota homolog                                                                                                                                                                                                 |
| 43 | IPI: IPI00003865.1 SWISS-PROT: P11142-<br>1 TREMBL: B3KTV0; B4E1Q1; Q53GZ6; Q96IS6 ENSEMBL: ENSP00000227378; ENSP00000432083; ENSP00000437125 REFSEQ: NP_006588 H-<br>INV: HIT000037619 VEGA: OTTHUMP00000231743; OTTHUMP00000231745; OTTHUMP00000231747 Tax_Id=9606 Gene_Symbol=HSPA8 Isoform 1 of Heat shock cognate 71 kDa<br>protein                                                            |
| 44 | IPI: IPI00414676.6 SWISS-<br>PROT: P08238 TREMBL: A8K3W9; B4DGL0; B4DMA2; Q6PK50; Q9H6X9 ENSEMBL: ENSP00000325875; ENSP00000360609; ENSP00000360709 REFSEQ: NP_031381 H-<br>INV: HIT000253179 VEGA: OTTHUMP00000016517; OTTHUMP00000016518; OTTHUMP00000016519 Tax_Id=9606 Gene_Symbol=HSP90AB1 Heat shock protein HSP 90-beta                                                                      |
| 45 | IPI: IPI00003881.5 SWISS-<br>PROT: P52597 ENSEMBL: ENSP00000338477; ENSP00000348345; ENSP00000349573; ENSP00000400433; ENSP00000438061 REFSEQ: NP_001091674; NP_001091675; NP_001091<br>676; NP_001091677; NP_001091678; NP_004957 H-INV: HIT000003838 VEGA: OTTHUMP00000019482; OTTHUMP00000043413; OTTHUMP00000043414 Tax_Id=9606<br>Gene_Symbol=HNRNPF Heterogeneous nuclear ribonucleoprotein F |
| 46 | IPI: IPI00032140.4 SWISS-PROT: P50454 TREMBL: A8K259 ENSEMBL: ENSP00000350894; ENSP00000434412; ENSP00000434657 REFSEQ: NP_001226 H-<br>INV: HIT000036818 VEGA: OTTHUMP00000229451; OTTHUMP00000229452; OTTHUMP00000229454 Tax_Id=9606 Gene_Symbol=SERPINH1 Serpin H1                                                                                                                               |
| 47 | IPI: IPI00005914.5 SWISS-PROT: Q9UHH6 TREMBL: B3KP31; B4DPJ0 ENSEMBL: ENSP00000225519 REFSEQ: NP_037408 H-INV: HIT000072225 VEGA: OTTHUMP00000115862<br>Tax_Id=9606 Gene_Symbol=SHPK Sedoheptulokinase                                                                                                                                                                                              |
| 48 | IPI: IPI01012950.1 TREMBL: F5H012 ENSEMBL: ENSP00000444045 Tax_Id=9606 Gene_Symbol=TRIM21 Uncharacterized protein                                                                                                                                                                                                                                                                                   |
| 49 | IPI: IPI00784154.1 SWISS-<br>PROT: P10809 TREMBL: B3GQS7; B7Z4F6; B7Z532; B7Z597; B9VP19; B9VPB4; Q53SE2 ENSEMBL: ENSP00000340019; ENSP00000373620 REFSEQ: NP_002147; NP_955472 H-<br>INV: HIT000031088 VEGA: OTTHUMP00000205744 Tax_Id=9606 Gene_Symbol=HSPD1 60 kDa heat shock protein, mitochondrial                                                                                             |
| 50 | IPI: IPI00784295.2 SWISS-PROT: P07900-1 TREMBL: O75322; Q2VPJ6; Q8TBA7; Q96HX7 ENSEMBL: ENSP00000216281 REFSEQ: NP_005339 H-INV: HIT000275312 Tax_Id=9606<br>Gene_Symbol=HSP90AA1 Isoform 1 of Heat shock protein HSP 90-alpha                                                                                                                                                                      |
| 51 | IPI: IPI00911039.1 TREMBL: B4DFN9; B4E3B6 Tax_Id=9606 Gene_Symbol=HSPA1B; HSPA1A cDNA FLJ54408, highly similar to Heat shock 70 kDa protein 1                                                                                                                                                                                                                                                       |
| 52 | IPI: IPI00026215.1 SWISS-PROT: P39748 TREMBL: B4DWZ4; Q6FHX6 ENSEMBL: ENSP00000305480 REFSEQ: NP_004102 H-INV: HIT000029517 VEGA: OTTHUMP00000238148<br>Tax_Id=9606 Gene_Symbol=FEN1 Flap endonuclease 1                                                                                                                                                                                            |
| 53 | IPI: IPI00032516.5 SWISS-PROT: Q9BXS5 ENSEMBL: ENSP00000291439 REFSEQ: NP_115882 H-INV: HIT000038020 Tax_Id=9606 Gene_Symbol=AP1M1 AP-1 complex subunit                                                                                                                                                                                                                                             |
| 54 | IPI: IPI00419792.3 H-INV: HIT000262728 Tax_Id=9606 Gene_Symbol=LOC407835 Similar to Dual specificity mitogen-activated protein kinase kinase 2                                                                                                                                                                                                                                                      |

|    |                                                                                                                                                                                                                                                                                                       |
|----|-------------------------------------------------------------------------------------------------------------------------------------------------------------------------------------------------------------------------------------------------------------------------------------------------------|
| 55 | IPI: IPI00908896.2 TREMBL: E9PCY7 ENSEMBL: ENSP00000426275 VEGA: OTTHUMP00000223421 Tax_Id=9606 Gene_Symbol=HNRNPH1 Uncharacterized protein                                                                                                                                                           |
| 56 | IPI: IPI00018398.4 SWISS-PROT: P17980 TREMBL: A8K781 ENSEMBL: ENSP00000298852 REFSEQ: NP_002795 H-INV: HIT000033914 VEGA: OTTHUMP00000236492 Tax_Id=9606 Gene_Symbol=PSMC3 26S protease regulatory subunit 6A                                                                                         |
| 57 | IPI: IPI00647506.1 TREMBL: Q5SQP8; Q8IY44 ENSEMBL: ENSP00000357816 VEGA: OTTHUMP00000020700 Tax_Id=9606 Gene_Symbol=CTBP2 Uncharacterized protein                                                                                                                                                     |
| 58 | IPI: IPI00018219.1 SWISS-PROT: Q15582 ENSEMBL: ENSP00000416330 REFSEQ: NP_000349 H-INV: HIT000029343 VEGA: OTTHUMP00000223339 Tax_Id=9606 Gene_Symbol=TGFBI Transforming growth factor-beta-induced protein ig-h3                                                                                     |
| 59 | IPI: IPI00847989.3 TREMBL: B4DNK4; E9PF79; Q8WUW7; Q9NYI7; Q9UK31; Q9UKK4 ENSEMBL: ENSP00000413887 REFSEQ: NP_001193726 Tax_Id=9606 Gene_Symbol=PKM2 Pyruvate kinase                                                                                                                                  |
| 60 | IPI: IPI00219148.2 SWISS-PROT: P16989-3 Tax_Id=9606 Gene_Symbol=CSDA Isoform 3 of DNA-binding protein A                                                                                                                                                                                               |
| 61 | IPI: IPI00023972.5 SWISS-PROT: Q9H0S4 TREMBL: Q53GJ1; Q7Z4B1; Q9H4E3 ENSEMBL: ENSP00000350698 REFSEQ: NP_057439 H-INV: HIT000025262; HIT000047585 VEGA: OTTHUMP00000239227 Tax_Id=9606 Gene_Symbol=DDX47 Probable ATP-dependent RNA helicase DDX47                                                    |
| 62 | IPI: IPI00024067.4 SWISS-PROT: Q00610-1 TREMBL: Q49AL0 ENSEMBL: ENSP00000269122 REFSEQ: NP_004850 H-INV: HIT000054067 VEGA: OTTHUMP00000165784 Tax_Id=9606 Gene_Symbol=CLTC Isoform 1 of Clathrin heavy chain 1                                                                                       |
| 63 | IPI: IPI00105598.3 SWISS-PROT: O00231 TREMBL: B4DTS5; Q53FT5 ENSEMBL: ENSP00000261712 REFSEQ: NP_002806 H-INV: HIT000058008 VEGA: OTTHUMP00000163703 Tax_Id=9606 Gene_Symbol=PSMD11 Proteasome 26S non-ATPase subunit 11 variant (Fragment)                                                           |
| 64 | IPI: IPI00296053.3 SWISS-PROT: P07954-1 TREMBL: B1ANK7 ENSEMBL: ENSP00000355518 REFSEQ: NP_000134 H-INV: HIT000031436 VEGA: OTTHUMP00000037573 Tax_Id=9606 Gene_Symbol=FH Isoform Mitochondrial of Fumarate hydratase, mitochondrial                                                                  |
| 65 | IPI: IPI00968298.1 TREMBL: D6RAX2 ENSEMBL: ENSP00000424684 VEGA: OTTHUMP00000217685 Tax_Id=9606 Gene_Symbol=CTBP1 Uncharacterized protein                                                                                                                                                             |
| 66 | IPI: IPI01013559.1 TREMBL: B7Z254 ENSEMBL: ENSP00000438778 Tax_Id=9606 Gene_Symbol=PDIA6 cDNA FLJ58502, highly similar to Protein disulfide-isomerase A6                                                                                                                                              |
| 67 | IPI: IPI00219018.7 SWISS-PROT: P04406 TREMBL: Q0QET7; Q2TSD0 ENSEMBL: ENSP00000229239; ENSP00000380068; ENSP00000380070 REFSEQ: NP_002037 H-INV: HIT000034167 VEGA: OTTHUMP00000174430; OTTHUMP00000174431; OTTHUMP00000174432 Tax_Id=9606 Gene_Symbol=GAPDH Glyceraldehyde-3-phosphate dehydrogenase |
| 68 | IPI: IPI00027463.1 SWISS-PROT: P06703 TREMBL: B2R577 ENSEMBL: ENSP00000357708; ENSP00000357709 REFSEQ: NP_055439 H-INV: HIT000034143 VEGA: OTTHUMP00000015472; OTTHUMP00000015473 Tax_Id=9606 Gene_Symbol=S100A6 Protein S100-A6                                                                      |
| 69 | IPI: IPI00186290.6 SWISS-PROT: P13639 TREMBL: Q6PK56; Q8TA90 ENSEMBL: ENSP00000307940 REFSEQ: NP_001952 H-INV: HIT000326370 Tax_Id=9606 Gene_Symbol=EEF2 Elongation factor 2                                                                                                                          |
| 70 | IPI: IPI00981169.1 TREMBL: B7ZAT2; Q9H369 ENSEMBL: ENSP00000445471 REFSEQ: NP_001185771 Tax_Id=9606 Gene_Symbol=CCT2 T-complex protein 1 subunit beta isoform                                                                                                                                         |
| 71 | IPI: IPI00015143.1 SWISS-PROT: O43913 TREMBL: A4D0P7; A8K8C0; Q53FC8; Q9UDM8 ENSEMBL: ENSP00000297431 REFSEQ: NP_002544 H-INV: HIT000222627 VEGA: OTTHUMP00000211897 Tax_Id=9606 Gene_Symbol=ORC5 Origin recognition complex subunit 5                                                                |
| 72 | IPI: IPI00024719.1 SWISS-PROT: O14929-1 ENSEMBL: ENSP00000264108 REFSEQ: NP_003633 H-INV: HIT000063031 VEGA: OTTHUMP00000163124 Tax_Id=9606 Gene_Symbol=HAT1 Isoform A of Histone acetyltransferase type B catalytic subunit                                                                          |
| 73 | IPI: IPI00218408.1 SWISS-PROT: P22102-2 ENSEMBL: ENSP00000354388 REFSEQ: NP_780294 VEGA: OTTHUMP00000068282 Tax_Id=9606 Gene_Symbol=GART Isoform Short of Trifunctional purine biosynthetic protein adenosine-3                                                                                       |
| 74 | IPI: IPI00013212.1 SWISS-PROT: P41240 TREMBL: A8K3B6; B2R6Q4; B4DMZ0; B5BU52; Q53EL3 ENSEMBL: ENSP00000220003; ENSP00000414764; ENSP00000438808 REFSEQ: NP_001120662; NP_004374 H-INV: HIT000299820 VEGA: OTTHUMP00000183471 Tax_Id=9606 Gene_Symbol=CSK Tyrosine-protein kinase CSK                  |
| 75 | IPI: IPI00028091.3 SWISS-PROT: P61158 TREMBL: Q53QM2; Q59FV6 ENSEMBL: ENSP00000263238 REFSEQ: NP_005712 H-INV: HIT000052876 VEGA: OTTHUMP00000203980 Tax_Id=9606 Gene_Symbol=ACTR3 Actin-related protein 3                                                                                            |
| 76 | IPI: IPI00032459.1 SWISS-PROT: Q9Y2T2 TREMBL: Q8NDP0 ENSEMBL: ENSP00000347408; ENSP00000361831 REFSEQ: NP_036227; NP_996895 H-INV: HIT000040153 VEGA: OTTHUMP00000019859; OTTHUMP00000019860 Tax_Id=9606 Gene_Symbol=AP3M1 AP-3 complex subunit mu-1                                                  |



|  |           |                                                                                                                                                                                                                                                                       |
|--|-----------|-----------------------------------------------------------------------------------------------------------------------------------------------------------------------------------------------------------------------------------------------------------------------|
|  | 77        | IPI:IPI00297982.7 SWISS-PROT:P41091 TREMBL:A8K2Y2;B2R5N2;Q53HK3 ENSEMBL:ENSP00000253039 REFSEQ:NP_001406 H-INV:HIT000038713 VEGA:OTTHUMP00000023076 Tax_Id=9606 Gene_Symbol=EIF2S3 Eukaryotic translation initiation factor 2 subunit 3                               |
|  | 78        | IPI:IPI00646491.2 SWISS-PROT:Q5JWF2-2 ENSEMBL:ENSP00000360143 VEGA:OTTHUMP00000031735 Tax_Id=9606 Gene_Symbol=GNAS Isoform XLas-2 of Guanine nucleotide-binding protein G(s) subunit alpha isoforms XLas                                                              |
|  | 79        | IPI:IPI00879904.1 SWISS-PROT:A6NHL2-2 ENSEMBL:ENSP00000418799 REFSEQ:NP_001165335 VEGA:OTTHUMP00000216159 Tax_Id=9606 Gene_Symbol=TUBAL3 Isoform 2 of Tubulin alpha chain-like 3                                                                                      |
|  | 80(FLOT1) | IPI:IPI00892872.2 TREMBL:B4DVY7 ENSEMBL:ENSP00000394375;ENSP00000447060;ENSP00000447798;ENSP00000448613;ENSP00000449498 Tax_Id=9606 Gene_Symbol=FLOT1 cDNA FLJ54943, highly similar to Flotillin-1                                                                    |
|  | 81        | IPI:IPI00908883.3 TREMBL:B4DM97 Tax_Id=9606 Gene_Symbol=ACTR1A cDNA FLJ55002, highly similar to Alpha-centractin                                                                                                                                                      |
|  | 82        | IPI:IPI00916112.1 TREMBL:B4DWF7 ENSEMBL:ENSP00000386837 VEGA:OTTHUMP00000206083 Tax_Id=9606 Gene_Symbol=BZW1 cDNA FLJ5501, highly similar to Rattus norvegicus basic leucine zipper and W2 domains 1 (Bzw1), mRNA                                                     |
|  | 83        | IPI:IPI01014133.1 TREMBL:B3KQ59 ENSEMBL:ENSP00000413890 Tax_Id=9606 Gene_Symbol=RUVBL2 cDNA FLJ32936 fis, clone TESTI2007533, highly similar to RuvB-like 2                                                                                                           |
|  | 84        | IPI:IPI00376005.2 SWISS-PROT:P63241-2 ENSEMBL:ENSP00000336702 REFSEQ:NP_001137232 H-INV:HIT000250756 Tax_Id=9606 Gene_Symbol=EIF5A Isoform 2 of Eukaryotic translation initiation factor 5A-1                                                                         |
|  | 85        | IPI:IPI00017334.1 SWISS-PROT:P35232 TREMBL:A8K401;Q53FV0;Q6FHP5;Q6PUJ7 ENSEMBL:ENSP00000300408 REFSEQ:NP_002625 H-INV:HIT000298776 VEGA:OTTHUMP00000165764 Tax_Id=9606 Gene_Symbol=PHB Prohibitin                                                                     |
|  | 86        | IPI:IPI00013895.1 SWISS-PROT:P31949 TREMBL:B2R5H0 ENSEMBL:ENSP00000271638 REFSEQ:NP_005611 H-INV:HIT000101457 VEGA:OTTHUMP00000015271 Tax_Id=9606 Gene_Symbol=S100A11 Protein S100-A11                                                                                |
|  | 87        | IPI:IPI00167572.4 SWISS-PROT:Q52LJ0 ENSEMBL:ENSP00000303412 REFSEQ:NP_001035894 H-INV:HIT000334873 Tax_Id=9606 Gene_Symbol=FAM98B Protein FAM98B                                                                                                                      |
|  | 88        | IPI:IPI00183626.8 TREMBL:Q9BUQ0 ENSEMBL:ENSP00000349428 REFSEQ:NP_002810 H-INV:HIT000322851 Tax_Id=9606 Gene_Symbol=PTBP1 polypyrimidine tract-binding protein 1 isoform a                                                                                            |
|  | 89        | IPI:IPI00654777.2 TREMBL:B3KSH1;E9PQV8 ENSEMBL:ENSP00000432489;ENSP00000442283 H-INV:HIT000018378 VEGA:OTTHUMP00000230692 Tax_Id=9606 Gene_Symbol=EIF3F cDNA FLJ36192 fis, clone TESTI2027450, highly similar to Eukaryotic translation initiation factor 3 subunit 5 |
|  | 90        | IPI:IPI00759776.1 TREMBL:A1L0V1;Q1HE25 ENSEMBL:ENSP00000377941 REFSEQ:NP_001123476 Tax_Id=9606 Gene_Symbol=ACTN1 alpha-actinin-1 isoform a                                                                                                                            |
|  | 91        | IPI:IPI00789008.1 SWISS-PROT:Q14254 TREMBL:E7EMK1;Q6FG43;Q9BTI6 ENSEMBL:ENSP00000378368 REFSEQ:NP_004466 H-INV:HIT000195971 VEGA:OTTHUMP00000163514 Tax_Id=9606 Gene_Symbol=FLOT2 Flotillin-2                                                                         |
|  | 92        | IPI:IPI00942979.1 SWISS-PROT:P29401 TREMBL:Q53EM5 ENSEMBL:ENSP00000405455;ENSP00000417773 REFSEQ:NP_001055;NP_001128527 H-INV:HIT000055895 VEGA:OTTHUMP00000212664;OTTHUMP00000212668 Tax_Id=9606 Gene_Symbol=TKT Transketolase                                       |
|  | 93        | IPI:IPI00001159.1 SWISS-PROT:Q92616 TREMBL:B4DM32;E1NZA1 ENSEMBL:ENSP00000300648 REFSEQ:NP_006827 H-INV:HIT000042355 Tax_Id=9606 Gene_Symbol=GCNIL1 Translational activator GCN1                                                                                      |
|  | 94        | IPI:IPI00001639.2 SWISS-PROT:Q14974 TREMBL:B2RBR9;B7Z752 ENSEMBL:ENSP00000290158 REFSEQ:NP_002256 H-INV:HIT000193420 VEGA:OTTHUMP00000035030 Tax_Id=9606 Gene_Symbol=KPNB1 Importin subunit beta-1                                                                    |
|  | 95        | IPI:IPI00001661.3 SWISS-PROT:P18754-2 ENSEMBL:ENSP00000362937 REFSEQ:NP_001041659 VEGA:OTTHUMP00000211005 Tax_Id=9606 Gene_Symbol=RCC1 Isoform 2 of Regulator of chromosome condensation                                                                              |
|  | 96        | IPI:IPI00019640.1 SWISS-PROT:Q99986 TREMBL:A8K245 ENSEMBL:ENSP00000216639 REFSEQ:NP_003375 H-INV:HIT000337353 Tax_Id=9606 Gene_Symbol=VRK1 Serine/threonine-protein kinase VRK1                                                                                       |
|  | 97        | IPI:IPI00020042.2 SWISS-PROT:P43686-1 TREMBL:A8K2M0 ENSEMBL:ENSP00000157812 REFSEQ:NP_006494 Tax_Id=9606 Gene_Symbol=PSMC4 Isoform 1 of 26S protease regulatory subunit 6B                                                                                            |
|  | 98        | IPI:IPI00026555.1 SWISS-PROT:O75648-1 ENSEMBL:ENSP00000290846 REFSEQ:NP_060476 H-INV:HIT000084046 VEGA:OTTHUMP00000197329 Tax_Id=9606 Gene_Symbol=TRMU Isoform 1 of Mitochondrial tRNA-specific 2-thiouridylase 1                                                     |
|  | 99        | IPI:IPI00032406.1 SWISS-PROT:O60884 ENSEMBL:ENSP00000314030 REFSEQ:NP_005871 H-INV:HIT000037340 VEGA:OTTHUMP00000164136 Tax_Id=9606 Gene_Symbol=DNAJA2 DnaJ homolog subfamily A member 2                                                                              |

|  |     |                                                                                                                                                                                                                                                    |
|--|-----|----------------------------------------------------------------------------------------------------------------------------------------------------------------------------------------------------------------------------------------------------|
|  | 100 | IPI:IPI00074010.4 ENSEMBL:ENSP00000420682 VEGA:OTTHUMP00000214918 Tax_Id=9606 Gene_Symbol=QTRTD1 48 kDa protein                                                                                                                                    |
|  | 101 | IPI:IPI00297084.7 SWISS-PROT:P39656 TREMBL:B4DLI2 ENSEMBL:ENSP00000364188 REFSEQ:NP_005207 H-INV:HIT000031020 VEGA:OTTHUMP00000002882 Tax_Id=9606 Gene_Symbol=DDOST Dolichyl-diphosphooligosaccharide--protein glycosyltransferase 48 kDa subunit  |
|  | 102 | IPI:IPI00306642.3 SWISS-PROT:Q9NV06-1 ENSEMBL:ENSP00000297579 REFSEQ:NP_056235 H-INV:HIT000011071 VEGA:OTTHUMP00000227826 Tax_Id=9606 Gene_Symbol=DCAF13 DDB1- and CUL4-associated factor 13                                                       |
|  | 103 | IPI:IPI00306934.4 SWISS-PROT:Q9HAD4 ENSEMBL:ENSP00000296679 REFSEQ:NP_060738 H-INV:HIT000052354 VEGA:OTTHUMP00000128362 Tax_Id=9606 Gene_Symbol=WDR41 WD repeat-containing protein 41                                                              |
|  | 104 | IPI:IPI00977430.1 TREMBL:B4DUR8 ENSEMBL:ENSP00000357244;ENSP00000431543 VEGA:OTTHUMP00000231497 Tax_Id=9606 Gene_Symbol=CCT3 cDNA, FLJ79286, highly similar to T-complex protein 1 subunit gamma                                                   |
|  | 105 | IPI:IPI01012504.1 TREMBL:B4DQJ8 ENSEMBL:ENSP00000437822 Tax_Id=9606 Gene_Symbol=PGD 6-phosphogluconate dehydrogenase, decarboxylating                                                                                                              |
|  | 106 | IPI:IPI00302944.3 SWISS-PROT:Q99715-4 ENSEMBL:ENSP00000406049;ENSP00000412864 VEGA:OTTHUMP00000219466 Tax_Id=9606 Gene_Symbol=COL12A1 Isoform 4 of Collagen alpha-1(XII) chain                                                                     |
|  | 107 | IPI:IPI00219217.3 SWISS-PROT:P07195 TREMBL:Q5U077 ENSEMBL:ENSP00000229319;ENSP00000379386 REFSEQ:NP_001167568;NP_002291 H-INV:HIT000037014 VEGA:OTTHUMP00000165228;OTTHUMP00000165229 Tax_Id=9606 Gene_Symbol=LDHB L-lactate dehydrogenase B chain |
|  | 108 | IPI:IPI00382697.2 SWISS-PROT:O75369-3 ENSEMBL:ENSP00000232447 Tax_Id=9606 Gene_Symbol=FLNB Isoform 3 of Filamin-B                                                                                                                                  |
|  | 109 | IPI:IPI01015196.1 TREMBL:B7Z1C9 ENSEMBL:ENSP00000438462 Tax_Id=9606 Gene_Symbol=CCT7 cDNA FLJ59454, highly similar to T-complex protein 1 subunit eta                                                                                              |
|  | 110 | IPI:IPI00009342.1 SWISS-PROT:P46940 TREMBL:A4QPBO;B4DNP4;B4E2M0;F5H7A1;Q05DN7;Q5FWG8;Q6P1N4;Q96PA3 ENSEMBL:ENSP00000268182 REFSEQ:NP_003861 H-                                                                                                     |
|  | 111 | IPI:IPI00011416.2 SWISS-PROT:Q13011 ENSEMBL:ENSP00000221418 REFSEQ:NP_001389 H-INV:HIT000035456 Tax_Id=9606 Gene_Symbol=ECH1 Delta(3,5)-Delta(2,4)-dienoyl-CoA isomerase, mitochondrial                                                            |
|  | 112 | IPI:IPI00336094.5 SWISS-PROT:Q99714-2 ENSEMBL:ENSP00000364453 REFSEQ:NP_001032900 VEGA:OTTHUMP00000023349 Tax_Id=9606 Gene_Symbol=HSD17B10 Isoform 2 of 3-hydroxyacyl-CoA dehydrogenase type-2                                                     |
|  | 113 | IPI:IPI00418169.3 SWISS-PROT:P07355-2 ENSEMBL:ENSP00000346032 REFSEQ:NP_001002858 Tax_Id=9606 Gene_Symbol=ANXA2 Isoform 2 of Annexin A2                                                                                                            |
|  | 114 | IPI:IPI00639931.3 SWISS-PROT:Q01518-2 ENSEMBL:ENSP00000344832;ENSP00000361884;ENSP00000361888 VEGA:OTTHUMP00000004823;OTTHUMP00000004824;OTTHUMP00000004825 Tax_Id=9606 Gene_Symbol=CAP1 Isoform 2 of Adenylyl cyclase-associated protein 1        |
|  | 115 | IPI:IPI00807557.1 TREMBL:Q05D08 ENSEMBL:ENSP00000387569 Tax_Id=9606 Gene_Symbol=PA2G4 PA2G4 protein (Fragment)                                                                                                                                     |
|  | 116 | IPI:IPI01010797.1 TREMBL:B2RCM3;Q59EF6 ENSEMBL:ENSP00000355834 Tax_Id=9606 Gene_Symbol=CAPN2 cDNA, FLJ96158, highly similar to Homo sapiens calpain 2, (m/II) large subunit (CAPN2), mRNA                                                          |
|  | 117 | IPI:IPI00003406.4 SWISS-PROT:Q16643-1 TREMBL:B3KSQ7;B7Z2Z0 ENSEMBL:ENSP00000308532 REFSEQ:NP_004386 H-INV:HIT000101074 VEGA:OTTHUMP00000161448 Tax_Id=9606 Gene_Symbol=DBN1 Isoform 1 of Drebrin                                                   |
|  | 118 | IPI:IPI00006164.4 SWISS-PROT:Q9H0C8 ENSEMBL:ENSP00000254654 REFSEQ:NP_110395 H-INV:HIT000032932 VEGA:OTTHUMP00000164472 Tax_Id=9606 Gene_Symbol=ILKAP Integrin-linked kinase-associated serine/threonine phosphatase 2C                            |
|  | 119 | IPI:IPI00007694.5 SWISS-PROT:Q9Y570-1 ENSEMBL:ENSP00000329867 REFSEQ:NP_057231 H-INV:HIT000005999 VEGA:OTTHUMP00000237973 Tax_Id=9606 Gene_Symbol=PPME1 Isoform 1 of Protein phosphatase methylesterase 1                                          |
|  | 120 | IPI:IPI00008524.1 SWISS-PROT:P11940-1 TREMBL:B4DZW4 ENSEMBL:ENSP00000313007 REFSEQ:NP_002559 H-INV:HIT000037423 VEGA:OTTHUMP00000227462 Tax_Id=9606 Gene_Symbol=PABPC1 Isoform 1 of Polyadenylate-binding protein 1                                |
|  | 121 | IPI:IPI00013122.1 SWISS-PROT:Q16543 TREMBL:A1L0W4;Q6FG59 ENSEMBL:ENSP00000222005 REFSEQ:NP_008996 H-INV:HIT000304645 Tax_Id=9606 Gene_Symbol=CDC37 Hsp90 co-chaperone Cdc37                                                                        |
|  | 122 | IPI:IPI00013847.4 SWISS-PROT:P31930 TREMBL:B4DUL5;B4DZB9 ENSEMBL:ENSP00000203407 REFSEQ:NP_003356 H-INV:HIT000049174 VEGA:OTTHUMP00000164820 Tax_Id=9606 Gene_Symbol=UQCRC1 Cytochrome b-c1 complex subunit 1, mitochondrial                       |

|  |     |                                                                                                                                                                                                                                                                                                                                                                                                                                                                                                                                                                                                              |
|--|-----|--------------------------------------------------------------------------------------------------------------------------------------------------------------------------------------------------------------------------------------------------------------------------------------------------------------------------------------------------------------------------------------------------------------------------------------------------------------------------------------------------------------------------------------------------------------------------------------------------------------|
|  | 123 | IPI:IPI00016839.1 SWISS-PROT:Q92759 TREMBL:B4DNU0;Q53HH3;Q76KU4 ENSEMBL:ENSP00000259895;ENSP00000365493;ENSP00000365504;ENSP00000383300;ENSP00000387980;ENSP00000388227;ENSP00000395497;ENSP00000396251;ENSP00000399554;ENSP00000401105;ENSP00000403156;ENSP00000409483 REFSEQ:NP_001508 VEGA:OTTHUMP00000014624;OTTHUMP00000014625;OTTHUMP00000029049;OTTHUMP00000029457;OTTHUMP00000164874;OTTHUMP00000165099;OTTHUMP00000193228;OTTHUMP00000193229;OTTHUMP00000193687;OTTHUMP00000193688;OTTHUMP00000194058;OTTHUMP00000194059 Tax_Id=9606 Gene_Symbol=GTF2H4 General transcription factor IIIH subunit 4 |
|  | 124 | IPI:IPI00022891.3 SWISS-PROT:P12235 TREMBL:A8K787 ENSEMBL:ENSP00000281456 REFSEQ:NP_001142 H-INV:HIT000033884 VEGA:OTTHUMP00000165924 Tax_Id=9606 Gene_Symbol=SLC25A4 ADP/ATP translocase 1                                                                                                                                                                                                                                                                                                                                                                                                                  |
|  | 125 | IPI:IPI00027350.3 SWISS-PROT:P32119 ENSEMBL:ENSP00000301522 REFSEQ:NP_005800 H-INV:HIT000277909 VEGA:OTTHUMP00000165823 Tax_Id=9606 Gene_Symbol=PRDX2 Peroxiredoxin-2                                                                                                                                                                                                                                                                                                                                                                                                                                        |
|  | 126 | IPI:IPI00027626.3 SWISS-PROT:P40227 TREMBL:B2R9K8;Q59ET3 ENSEMBL:ENSP00000275603 REFSEQ:NP_001753 H-INV:HIT000078722 VEGA:OTTHUMP00000159736 Tax_Id=9606 Gene_Symbol=CCT6A T-complex protein 1 subunit zeta                                                                                                                                                                                                                                                                                                                                                                                                  |
|  | 127 | IPI:IPI00028611.1 SWISS-PROT:P24468 TREMBL:F1D8R0 ENSEMBL:ENSP00000377721 REFSEQ:NP_066285 H-INV:HIT000052753 VEGA:OTTHUMP00000194781 Tax_Id=9606 Gene_Symbol=NR2F2 COUP transcription factor 2                                                                                                                                                                                                                                                                                                                                                                                                              |
|  | 128 | IPI:IPI00029764.1 SWISS-PROT:Q12874 TREMBL:A8K566;A8K7V1;B3KY12;Q53HM6 ENSEMBL:ENSP00000362110 REFSEQ:NP_006793 H-INV:HIT000217844 VEGA:OTTHUMP00000004730 Tax_Id=9606 Gene_Symbol=SF3A3 Splicing factor 3A subunit 3                                                                                                                                                                                                                                                                                                                                                                                        |
|  | 129 | IPI:IPI00165230.1 SWISS-PROT:Q96EP5-1 TREMBL:B3KS63 ENSEMBL:ENSP00000233078 REFSEQ:NP_061832 H-INV:HIT000035629 Tax_Id=9606 Gene_Symbol=DAZAP1 Isoform 1 of DAZ-associated protein 1                                                                                                                                                                                                                                                                                                                                                                                                                         |
|  | 130 | IPI:IPI00183526.6 TREMBL:C9JWL1;Q9BQ02 ENSEMBL:ENSP00000319617;ENSP00000401620 VEGA:OTTHUMP00000204508 Tax_Id=9606 Gene_Symbol=NCL Uncharacterized protein                                                                                                                                                                                                                                                                                                                                                                                                                                                   |
|  | 131 | IPI:IPI00220834.8 SWISS-PROT:P13010 TREMBL:Q53T09;Q53TC2 ENSEMBL:ENSP00000375977;ENSP00000375978 REFSEQ:NP_066964 H-INV:HIT000195394 VEGA:OTTHUMP00000164061 Tax_Id=9606 Gene_Symbol=XRCC5 X-ray repair cross-complementing protein 5                                                                                                                                                                                                                                                                                                                                                                        |
|  | 132 | IPI:IPI00383680.3 TREMBL:A6NKT1;B4DJL0;Q5JYR6 ENSEMBL:ENSP00000362724 REFSEQ:NP_001129243 VEGA:OTTHUMP00000030902 Tax_Id=9606 Gene_Symbol=RPN2 dolichyl-diphosphooligosaccharide--protein glycosyltransferase subunit 2 isoform 2 precursor                                                                                                                                                                                                                                                                                                                                                                  |
|  | 133 | IPI:IPI00640632.1 TREMBL:B1ALY6 ENSEMBL:ENSP00000340705 VEGA:OTTHUMP00000021932 Tax_Id=9606 Gene_Symbol=ROD1 Uncharacterized protein                                                                                                                                                                                                                                                                                                                                                                                                                                                                         |
|  | 134 | IPI:IPI00646759.2 TREMBL:A3KFJ0 ENSEMBL:ENSP00000379243 VEGA:OTTHUMP00000166072 Tax_Id=9606 Gene_Symbol=AURKA Uncharacterized protein                                                                                                                                                                                                                                                                                                                                                                                                                                                                        |
|  | 135 | IPI:IPI00894416.1 TREMBL:E7ETZ4 ENSEMBL:ENSP00000403481 VEGA:OTTHUMP00000201712 Tax_Id=9606 Gene_Symbol=BZW2 Uncharacterized protein                                                                                                                                                                                                                                                                                                                                                                                                                                                                         |
|  | 136 | IPI:IPI00921414.1 H-INV:HIT000334596 Tax_Id=9606 Gene_Symbol=- Chaperonin Cpn60/TCP-1 family protein                                                                                                                                                                                                                                                                                                                                                                                                                                                                                                         |
|  | 137 | IPI:IPI00930631.2 TREMBL:F5H3X4 ENSEMBL:ENSP00000371836 Tax_Id=9606 Gene_Symbol=CBWD6 Uncharacterized protein                                                                                                                                                                                                                                                                                                                                                                                                                                                                                                |
|  | 138 | IPI:IPI00940237.1 SWISS-PROT:O00148 TREMBL:Q69YT6 ENSEMBL:ENSP00000242776 REFSEQ:NP_005795 H-INV:HIT000285362 Tax_Id=9606 Gene_Symbol=DDX39A ATP-dependent RNA helicase DDX39A                                                                                                                                                                                                                                                                                                                                                                                                                               |
|  | 139 | IPI:IPI00942264.1 TREMBL:C9JV49;C9JW95 ENSEMBL:ENSP00000412887 Tax_Id=9606 Gene_Symbol=HARS2 Uncharacterized protein                                                                                                                                                                                                                                                                                                                                                                                                                                                                                         |
|  | 140 | IPI:IPI00985370.2 TREMBL:E9PMM9 ENSEMBL:ENSP00000433034 VEGA:OTTHUMP00000231878 Tax_Id=9606 Gene_Symbol=RPS2 Uncharacterized protein                                                                                                                                                                                                                                                                                                                                                                                                                                                                         |
|  | 141 | IPI:IPI01010391.1 TREMBL:B4DXK9;F5GYK5 ENSEMBL:ENSP00000440897 REFSEQ:NP_001185918 Tax_Id=9606 Gene_Symbol=NFS1 cysteine desulfurase, mitochondrial isoform b precursor                                                                                                                                                                                                                                                                                                                                                                                                                                      |
|  | 142 | IPI:IPI01013746.1 TREMBL:B4E2Y9 ENSEMBL:ENSP00000444895 Tax_Id=9606 Gene_Symbol=CALR cDNA FLJ58668, highly similar to Calreticulin                                                                                                                                                                                                                                                                                                                                                                                                                                                                           |
|  | 143 | IPI:IPI00171611.7 SWISS-PROT:Q71DI3 ENSEMBL:ENSP00000333277;ENSP00000358154;ENSP00000385479 REFSEQ:NP_001005464;NP_001116847;NP_066403 VEGA:OTTHUMP00000013917;OTTHUMP00000013919;OTTHUMP00000014041 Tax_Id=9606 Gene_Symbol=HIST2H3D;HIST2H3A;HIST2H3C Histone H3.2                                                                                                                                                                                                                                                                                                                                         |
|  | 144 | IPI:IPI00024919.3 SWISS-PROT:P30048 TREMBL:A4UCS5;Q53HC2 ENSEMBL:ENSP00000298510 REFSEQ:NP_006784 H-INV:HIT000039251 VEGA:OTTHUMP00000020590 Tax_Id=9606 Gene_Symbol=PRDX3 Thioredoxin-dependent peroxide reductase, mitochondrial                                                                                                                                                                                                                                                                                                                                                                           |

|  |     |                                                                                                                                                                                                                                                                                                                                                                                                                                                                                                                                                                                                                                                                                                                                                                                                                                                       |
|--|-----|-------------------------------------------------------------------------------------------------------------------------------------------------------------------------------------------------------------------------------------------------------------------------------------------------------------------------------------------------------------------------------------------------------------------------------------------------------------------------------------------------------------------------------------------------------------------------------------------------------------------------------------------------------------------------------------------------------------------------------------------------------------------------------------------------------------------------------------------------------|
|  | 145 | IPI: IPI00465070.7 SWISS-PROT: P68431 ENSEMBL: ENSP00000244661; ENSP00000329554; ENSP00000350275; ENSP00000352252; ENSP00000353581; ENSP00000358160; ENSP00000366999; ENSP00000367062; ENSP00000439493; ENSP00000439660; ENSP00000444823 REFSEQ: NP_003520; NP_003521; NP_003522; NP_003523; NP_003524; NP_003525; NP_003526; NP_003527; NP_03528; NP_066298 H-INV: HIT000035722; HIT000041284; HIT000053853; HIT000259871; HIT000260307; HIT000262140; HIT000262650; HIT000263305; HIT000263457 VEGA: OTTHUMP00000016132; OTTHUMP00000016133; OTTHUMP00000016135; OTTHUMP00000016149; OTTHUMP00000016150; OTTHUMP00000016151; OTTHUMP00000016152; OTTHUMP00000016182; OTTHUMP00000017803; OTTHUMP00000017804 Tax_Id=9606 Gene_Symbol=HIST1H3H; HIST1H3A; HIST1H3F; HIST1H3B; HIST1H3E; HIST1H3I; HIST1H3J; HIST1H3C; HIST1H3G; HIST1H3D Histone H3.1 |
|  | 146 | IPI: IPI00917623.1 TREMBL: B3KRM8; B7Z5D9; E9PGT1 ENSEMBL: ENSP00000387263; ENSP00000395946 VEGA: OTTHUMP00000203715 Tax_Id=9606 Gene_Symbol=TSN Uncharacterized protein                                                                                                                                                                                                                                                                                                                                                                                                                                                                                                                                                                                                                                                                              |
|  | 147 | IPI: IPI00010951.2 SWISS-PROT: P58107 TREMBL: E9PPU0; Q9NSU9 ENSEMBL: ENSP00000436337 REFSEQ: NP_112598 H-INV: HIT000026013 VEGA: OTTHUMP00000228909 Tax_Id=9606 Gene_Symbol=EPPK1 Epiplakin                                                                                                                                                                                                                                                                                                                                                                                                                                                                                                                                                                                                                                                          |
|  | 148 | IPI: IPI00027230.3 SWISS-PROT: P14625 TREMBL: Q59FC6; Q5CAQ5 ENSEMBL: ENSP00000299767 REFSEQ: NP_003290 H-INV: HIT000262289 Tax_Id=9606 Gene_Symbol=HSP90B1 Endoplasmic reticulum chaperone                                                                                                                                                                                                                                                                                                                                                                                                                                                                                                                                                                                                                                                           |
|  | 149 | IPI: IPI00183695.9 SWISS-PROT: P60903 TREMBL: D3DV26; Q6FGE5 ENSEMBL: ENSP00000357799; ENSP00000357801 REFSEQ: NP_002957 H-INV: HIT000037431 VEGA: OTTHUMP00000015269; OTTHUMP00000015270 Tax_Id=9606 Gene_Symbol=S100A10 Protein S100-A10                                                                                                                                                                                                                                                                                                                                                                                                                                                                                                                                                                                                            |
|  | 150 | IPI: IPI00219038.9 SWISS-PROT: P84243 TREMBL: A8K4Y7; B2R4P9; B2R6Y1; Q6TXQ4 ENSEMBL: ENSP00000254810; ENSP00000355778; ENSP00000355780; ENSP00000355781 REFSEQ: NP_002098; NP_005315 H-INV: HIT000054194; HIT000271836; HIT000288836 VEGA: OTTHUMP00000035618; OTTHUMP00000035619; OTTHUMP00000035621 Tax_Id=9606 Gene_Symbol=H3F3A; H3F3B; H3F3AP6; H3F3AP4 Histone H3.3                                                                                                                                                                                                                                                                                                                                                                                                                                                                            |
|  | 151 | IPI: IPI00221091.9 SWISS-PROT: P62244 TREMBL: A8K7H3; B2R4W8 ENSEMBL: ENSP00000318646 REFSEQ: NP_001010; NP_001025180 H-INV: HIT000338243 VEGA: OTTHUMP00000162054 Tax_Id=9606 Gene_Symbol=RPS15A 40S ribosomal protein S15a                                                                                                                                                                                                                                                                                                                                                                                                                                                                                                                                                                                                                          |
|  | 152 | IPI: IPI00239077.5 SWISS-PROT: P49773 ENSEMBL: ENSP00000304229 REFSEQ: NP_005331 H-INV: HIT000033040 VEGA: OTTHUMP00000159244 Tax_Id=9606 Gene_Symbol=HINT1 Histidine triad nucleotide-binding protein 1                                                                                                                                                                                                                                                                                                                                                                                                                                                                                                                                                                                                                                              |
|  | 153 | IPI: IPI00298090.1 SWISS-PROT: Q13554-6 ENSEMBL: ENSP00000326544 REFSEQ: NP_742079 VEGA: OTTHUMP00000159441 Tax_Id=9606 Gene_Symbol=CAMK2B Isoform 6 of Calcium/calmodulin-dependent protein kinase type II subunit beta                                                                                                                                                                                                                                                                                                                                                                                                                                                                                                                                                                                                                              |
|  | 154 | IPI: IPI00644667.1 TREMBL: Q5SQT8 ENSEMBL: ENSP00000362333 VEGA: OTTHUMP00000019746 Tax_Id=9606 Gene_Symbol=SAR1A Uncharacterized protein                                                                                                                                                                                                                                                                                                                                                                                                                                                                                                                                                                                                                                                                                                             |
|  | 155 | IPI: IPI00910754.1 TREMBL: B4DKQ2 ENSEMBL: ENSP00000406172 REFSEQ: NP_001128711 VEGA: OTTHUMP00000236636 Tax_Id=9606 Gene_Symbol=LDHA L-lactate dehydrogenase A chain isoform 2                                                                                                                                                                                                                                                                                                                                                                                                                                                                                                                                                                                                                                                                       |
|  | 156 | IPI: IPI01008853.1 TREMBL: E7EMT4; E7ESG6 ENSEMBL: ENSP00000416844; ENSP00000446617; ENSP00000448143; ENSP00000448148; ENSP00000449202; ENSP00000449869 Tax_Id=9606 Gene_Symbol=SLC39A7 Uncharacterized protein                                                                                                                                                                                                                                                                                                                                                                                                                                                                                                                                                                                                                                       |
|  | 157 | IPI: IPI01009588.1 SWISS-PROT: Q15063-3 ENSEMBL: ENSP00000437959 REFSEQ: NP_001129407 Tax_Id=9606 Gene_Symbol=POSTN Isoform 3 of Periostin                                                                                                                                                                                                                                                                                                                                                                                                                                                                                                                                                                                                                                                                                                            |
|  | 158 | IPI: IPI00000948.3 SWISS-PROT: Q9Y4P3 TREMBL: B2RB52; B4DY50; Q8N2L6 ENSEMBL: ENSP00000307260 REFSEQ: NP_036585 H-INV: HIT000024283 VEGA: OTTHUMP00000160428 Tax_Id=9606 Gene_Symbol=TBL2 Transducin beta-like protein 2                                                                                                                                                                                                                                                                                                                                                                                                                                                                                                                                                                                                                              |
|  | 159 | IPI: IPI00001757.1 SWISS-PROT: Q9Y5S9-1 ENSEMBL: ENSP00000333001 REFSEQ: NP_005096 H-INV: HIT000264406 VEGA: OTTHUMP00000015573 Tax_Id=9606 Gene_Symbol=RBM8A Isoform 1 of RNA-binding protein 8A                                                                                                                                                                                                                                                                                                                                                                                                                                                                                                                                                                                                                                                     |
|  | 160 | IPI: IPI00003627.1 SWISS-PROT: O96019-1 TREMBL: Q53FS0; Q6F197 ENSEMBL: ENSP00000397552 REFSEQ: NP_004292 H-INV: HIT000023521 VEGA: OTTHUMP00000212444 Tax_Id=9606 Gene_Symbol=ACTL6A Isoform 1 of Actin-like protein 6A                                                                                                                                                                                                                                                                                                                                                                                                                                                                                                                                                                                                                              |
|  | 161 | IPI: IPI00004489.1 SWISS-PROT: O95396 ENSEMBL: ENSP00000244051 REFSEQ: NP_055299 H-INV: HIT000037413 VEGA: OTTHUMP00000031284 Tax_Id=9606 Gene_Symbol=MOCS3 Adenylyltransferase and sulfurtransferase MOCS3                                                                                                                                                                                                                                                                                                                                                                                                                                                                                                                                                                                                                                           |
|  | 162 | IPI: IPI00006952.3 SWISS-PROT: Q53H82 TREMBL: A8K2D6 ENSEMBL: ENSP00000276590; ENSP00000428801 REFSEQ: NP_057111 H-INV: HIT000071654 VEGA: OTTHUMP00000226691; OTTHUMP00000226692 Tax_Id=9606 Gene_Symbol=LACTB2 Beta-lactamase-like protein 2                                                                                                                                                                                                                                                                                                                                                                                                                                                                                                                                                                                                        |

|     |                                                                                                                                                                                                                                                                                                                                       |
|-----|---------------------------------------------------------------------------------------------------------------------------------------------------------------------------------------------------------------------------------------------------------------------------------------------------------------------------------------|
| 163 | IPI: IPI00008982.1 SWISS-PROT: P54886-1 ENSEMBL: ENSP00000360268 REFSEQ: NP_002851 H-INV: HIT000221298 VEGA: OTTHUMP00000020159 Tax_Id=9606<br>Gene_Symbol=ALDH18A1 Isoform Long of Delta-1-pyrroline-5-carboxylate synthase                                                                                                          |
| 164 | IPI: IPI00010218.1 TREMBL: E7ERE8;F8WBE2;Q53RS5;Q8WZ13;Q9HC04 ENSEMBL: ENSP00000397114;ENSP00000414831 VEGA: OTTHUMP00000206147 Tax_Id=9606<br>Gene_Symbol=CYP20A1 Cytochrome P450 monooxygenase                                                                                                                                      |
| 165 | IPI: IPI00012772.8 SWISS-PROT: P62917 ENSEMBL: ENSP00000262584;ENSP00000378378 REFSEQ: NP_000964;NP_150644 H-INV: HIT000334555 VEGA: OTTHUMP00000229065;OTTHUMP00000229067 Tax_Id=9606 Gene_Symbol=RPL8 60S ribosomal protein L8                                                                                                      |
| 166 | IPI: IPI00012837.1 SWISS-PROT: P33176 TREMBL: A8K048;D3DRX6;Q2TA90;Q66K46;Q6P164 ENSEMBL: ENSP00000307078 REFSEQ: NP_004512 H-INV: HIT000322766 VEGA: OTTHUMP00000019411 Tax_Id=9606 Gene_Symbol=KIF5B Kinesin-1 heavy chain                                                                                                          |
| 167 | IPI: IPI00014198.3 SWISS-PROT: Q15024 TREMBL: B2RDZ9;B4DIU0 ENSEMBL: ENSP00000265564 REFSEQ: NP_055819 H-INV: HIT000035984 VEGA: OTTHUMP00000164126<br>Tax_Id=9606 Gene_Symbol=EXOSC7 Exosome complex component RRP42                                                                                                                 |
| 168 | IPI: IPI00014230.1 SWISS-PROT: Q07021 TREMBL: A8K651 ENSEMBL: ENSP00000225698 REFSEQ: NP_001203 H-INV: HIT000286556 Tax_Id=9606 Gene_Symbol=C1QBP<br>Complement component 1 Q subcomponent-binding protein, mitochondrial                                                                                                             |
| 169 | IPI: IPI00016610.2 SWISS-PROT: Q15365 TREMBL: Q53SS8 ENSEMBL: ENSP00000305556 REFSEQ: NP_006187 H-INV: HIT000303351 VEGA: OTTHUMP00000160048<br>Tax_Id=9606 Gene_Symbol=PCBP1 Poly(rC)-binding protein 1                                                                                                                              |
| 170 | IPI: IPI00016676.1 SWISS-PROT: Q15388 ENSEMBL: ENSP00000355566 REFSEQ: NP_055580 H-INV: HIT000042150 VEGA: OTTHUMP00000037593 Tax_Id=9606<br>Gene_Symbol=TOMM20 Mitochondrial import receptor subunit TOM20 homolog                                                                                                                   |
| 171 | IPI: IPI00017339.1 SWISS-PROT: Q15427 TREMBL: B3KUJ0;Q53FG6 ENSEMBL: ENSP00000271628 REFSEQ: NP_005841 H-INV: HIT000334267 VEGA: OTTHUMP00000014064<br>Tax_Id=9606 Gene_Symbol=SF3B4 Splicing factor 3B subunit 4                                                                                                                     |
| 172 | IPI: IPI00022373.2 SWISS-PROT: Q9ULX3 TREMBL: B2RAR2 ENSEMBL: ENSP00000268802 REFSEQ: NP_054781 H-INV: HIT000254906 VEGA: OTTHUMP00000174899<br>Tax_Id=9606 Gene_Symbol=NOB1 RNA-binding protein NOB1                                                                                                                                 |
| 173 | IPI: IPI00023636.3 SWISS-PROT: O14733-1 TREMBL: D6W660 ENSEMBL: ENSP00000381066 REFSEQ: NP_660186 H-INV: HIT000062690 VEGA: OTTHUMP00000174397<br>Tax_Id=9606 Gene_Symbol=MAP2K7 Isoform 1 of Dual specificity mitogen-activated protein kinase kinase 7                                                                              |
| 174 | IPI: IPI00024095.3 SWISS-PROT: P12429 ENSEMBL: ENSP00000264908 REFSEQ: NP_005130 H-INV: HIT000280896 VEGA: OTTHUMP00000160701 Tax_Id=9606<br>Gene_Symbol=ANXA3 Annexin A3                                                                                                                                                             |
| 175 | IPI: IPI00025252.1 SWISS-PROT: P30101 ENSEMBL: ENSP00000300289 REFSEQ: NP_005304 H-INV: HIT000294181 VEGA: OTTHUMP00000041709 Tax_Id=9606<br>Gene_Symbol=PDIA3 Protein disulfide-isomerase A3                                                                                                                                         |
| 176 | IPI: IPI00026546.1 SWISS-PROT: P68402 TREMBL: Q6IBR6 ENSEMBL: ENSP00000435289 REFSEQ: NP_002563 H-INV: HIT000282479 VEGA: OTTHUMP00000234977<br>Tax_Id=9606 Gene_Symbol=PFAH1B2 Platelet-activating factor acetylhydrolase IB subunit beta                                                                                            |
| 177 | IPI: IPI00027223.2 SWISS-PROT: O75874 TREMBL: B2R5M8;B4DXS4;Q0QER2;Q567U4;Q6FHQ6;Q6FI37;Q6FIA4 ENSEMBL: ENSP00000260985;ENSP00000390265;ENSP00000410513 REFSEQ: NP_005887 H-INV: HIT000287928 VEGA: OTTHUMP00000163870;OTTHUMP00000206464;OTTHUMP00000206466 Tax_Id=9606 Gene_Symbol=IDH1 Isocitrate dehydrogenase [NADP] cytoplasmic |
| 178 | IPI: IPI00027252.6 SWISS-PROT: Q99623 TREMBL: Q9BXV3 ENSEMBL: ENSP00000382362;ENSP00000441875 REFSEQ: NP_001138303;NP_009204 H-INV: HIT000339489 VEGA: OTTHUMP00000238920 Tax_Id=9606 Gene_Symbol=PHB2 Prohibitin-2                                                                                                                   |
| 179 | IPI: IPI00029266.1 SWISS-PROT: P62304 ENSEMBL: ENSP00000400591 REFSEQ: NP_003085 H-INV: HIT000334313 VEGA: OTTHUMP00000034219 Tax_Id=9606<br>Gene_Symbol=SNRPE Small nuclear ribonucleoprotein E                                                                                                                                      |
| 180 | IPI: IPI00031008.2 SWISS-PROT: P24821-1 TREMBL: Q4LE33 ENSEMBL: ENSP00000265131 REFSEQ: NP_002151 H-INV: HIT000323670 VEGA: OTTHUMP00000022738<br>Tax_Id=9606 Gene_Symbol=TNC Isoform 1 of Tenascin                                                                                                                                   |
| 181 | IPI: IPI00032533.3 SWISS-PROT: Q9BV38 ENSEMBL: ENSP00000251289 REFSEQ: NP_077005 H-INV: HIT000294929 Tax_Id=9606 Gene_Symbol=WDR18 WD repeat-containing protein 18                                                                                                                                                                    |
| 182 | IPI: IPI00037448.3 SWISS-PROT: Q9UBQ7 TREMBL: Q5T945 ENSEMBL: ENSP00000313432 REFSEQ: NP_036335 H-INV: HIT000295600 VEGA: OTTHUMP00000021379<br>Tax_Id=9606 Gene_Symbol=GRHPR Glyoxylate reductase/hydroxypyruvate reductase                                                                                                          |

|     |                                                                                                                                                                                                                                                                             |
|-----|-----------------------------------------------------------------------------------------------------------------------------------------------------------------------------------------------------------------------------------------------------------------------------|
| 183 | IPI: IPI00063302.1 SWISS-PROT: Q96HU8 ENSEMBL: ENSP00000364919 REFSEQ: NP_060064 H-INV: HIT000042859 VEGA: OTTHUMP00000021626 Tax_Id=9606<br>Gene_Symbol=DIRAS2 GTP-binding protein Di-Ras2                                                                                 |
| 184 | IPI: IPI00141938.4 TREMBL: A6NN01 ENSEMBL: ENSP00000222690 REFSEQ: NP_619541 H-INV: HIT000007247 VEGA: OTTHUMP00000159512 Tax_Id=9606<br>Gene_Symbol=H2AFV histone H2A.V isoform 2                                                                                          |
| 185 | IPI: IPI00152881.5 SWISS-PROT: Q8TF72-1 TREMBL: B3KY47 ENSEMBL: ENSP00000296043 REFSEQ: NP_065910 H-INV: HIT000059726 VEGA: OTTHUMP00000160595<br>Tax_Id=9606 Gene_Symbol=SHROOM3 Isoform 1 of Protein Shroom3                                                              |
| 186 | IPI: IPI00185374.4 SWISS-PROT: O00232 ENSEMBL: ENSP00000348442 REFSEQ: NP_002807 H-INV: HIT000038526 VEGA: OTTHUMP00000179135 Tax_Id=9606<br>Gene_Symbol=PSMD12 26S proteasome non-ATPase regulatory subunit 12                                                             |
| 187 | IPI: IPI00215637.5 SWISS-PROT: O00571 TREMBL: B5BTY4; Q59GX6 ENSEMBL: ENSP00000382840 REFSEQ: NP_001347 H-INV: HIT000220175 VEGA: OTTHUMP00000023143<br>Tax_Id=9606 Gene_Symbol=DDX3X ATP-dependent RNA helicase DDX3X                                                      |
| 188 | IPI: IPI00215914.5 SWISS-PROT: P84077 ENSEMBL: ENSP00000272102; ENSP00000440005; ENSP00000442980 REFSEQ: NP_001019397; NP_001019398; NP_001019399; NP_001649 H-INV: HIT000003095 VEGA: OTTHUMP00000035715 Tax_Id=9606 Gene_Symbol=ARF1 ADP-ribosylation factor 1            |
| 189 | IPI: IPI00216049.1 SWISS-PROT: P61978-1 ENSEMBL: ENSP00000317788; ENSP00000353552; ENSP00000365440 REFSEQ: NP_112552 H-INV: HIT000036940 VEGA: OTTHUMP00000021553; OTTHUMP00000021558 Tax_Id=9606 Gene_Symbol=HNRNPK Isoform 1 of Heterogeneous nuclear ribonucleoprotein K |
| 190 | IPI: IPI00216691.5 SWISS-PROT: P07737 TREMBL: Q53Y44 ENSEMBL: ENSP00000225655 REFSEQ: NP_005013 H-INV: HIT000272364 VEGA: OTTHUMP00000125244<br>Tax_Id=9606 Gene_Symbol=PFN1 Profilin-1                                                                                     |
| 191 | IPI: IPI00219219.3 SWISS-PROT: P09382 TREMBL: Q15954 ENSEMBL: ENSP00000215909 REFSEQ: NP_002296 H-INV: HIT000267445 VEGA: OTTHUMP00000198176<br>Tax_Id=9606 Gene_Symbol=LGALS1 Galectin-1                                                                                   |
| 192 | IPI: IPI00251989.2 SWISS-PROT: Q9GZS1-1 ENSEMBL: ENSP00000367023 VEGA: OTTHUMP00000021386 Tax_Id=9606 Gene_Symbol=POLR1E Isoform 1 of DNA-directed RNA polymerase I subunit RPA49                                                                                           |
| 193 | IPI: IPI00289807.4 SWISS-PROT: Q96Q11-1 ENSEMBL: ENSP00000251607; ENSP00000415100 REFSEQ: NP_886552 H-INV: HIT000035858 VEGA: OTTHUMP00000206931; OTTHUMP00000207297 Tax_Id=9606 Gene_Symbol=TRNT1 Isoform 1 of CCA tRNA nucleotidyltransferase 1, mitochondrial            |
| 194 | IPI: IPI00291175.7 SWISS-PROT: P18206-2 TREMBL: B3KXA2 ENSEMBL: ENSP00000361841 REFSEQ: NP_003364 H-INV: HIT000195504 VEGA: OTTHUMP00000019861<br>Tax_Id=9606 Gene_Symbol=VCL Isoform 1 of Vinculin                                                                         |
| 195 | IPI: IPI00292221.3 SWISS-PROT: Q9H9Y2 ENSEMBL: ENSP00000359688 REFSEQ: NP_079341 H-INV: HIT000305860 VEGA: OTTHUMP00000011472 Tax_Id=9606<br>Gene_Symbol=RPF1 Ribosome production factor 1                                                                                  |
| 196 | IPI: IPI00297452.5 TREMBL: C9JJP5; Q8TDJ5 ENSEMBL: ENSP00000420797 VEGA: OTTHUMP00000214066 Tax_Id=9606 Gene_Symbol=TFG Tyrosine-protein kinase receptor                                                                                                                    |
| 197 | IPI: IPI00298520.4 TREMBL: B0YIW6; Q6MZV5 ENSEMBL: ENSP00000352385 VEGA: OTTHUMP00000232678 Tax_Id=9606 Gene_Symbol=ARCN1 Uncharacterized protein                                                                                                                           |
| 198 | IPI: IPI00304082.8 SWISS-PROT: Q96CN7 ENSEMBL: ENSP00000173527 REFSEQ: NP_057132 H-INV: HIT000036522 VEGA: OTTHUMP00000223219 Tax_Id=9606<br>Gene_Symbol=ISOC1 Isochorismatase domain-containing protein 1                                                                  |
| 199 | IPI: IPI00339274.5 SWISS-PROT: Q16777 ENSEMBL: ENSP00000332194 REFSEQ: NP_003508 H-INV: HIT000260048 VEGA: OTTHUMP00000033967 Tax_Id=9606<br>Gene_Symbol=HIST2H2AC Histone H2A type 2-C                                                                                     |
| 200 | IPI: IPI00375145.1 SWISS-PROT: P45974-2 ENSEMBL: ENSP00000373883 REFSEQ: NP_003472 VEGA: OTTHUMP00000240482 Tax_Id=9606 Gene_Symbol=USP5 Isoform Short of Ubiquitin carboxyl-terminal hydrolase 5                                                                           |
| 201 | IPI: IPI00376215.2 SWISS-PROT: P78527-2 TREMBL: B4DL41; E7EUY0 ENSEMBL: ENSP00000345182; ENSP00000442177 REFSEQ: NP_001075109 VEGA: OTTHUMP00000237534 Tax_Id=9606 Gene_Symbol=PRKDC                                                                                        |
| 202 | IPI: IPI00395769.2 SWISS-PROT: P36542-2 TREMBL: B4DFE6 ENSEMBL: ENSP00000338568 REFSEQ: NP_005165 VEGA: OTTHUMP00000019069 Tax_Id=9606<br>Gene_Symbol=ATP5C1 Isoform Heart of ATP synthase subunit gamma, mitochondrial                                                     |
| 203 | IPI: IPI00395817.1 SWISS-PROT: Q96E40-2 ENSEMBL: ENSP00000298546 REFSEQ: NP_061829 H-INV: HIT000244505 VEGA: OTTHUMP00000022442 Tax_Id=9606<br>Gene_Symbol=C9orf9 Isoform 2 of Uncharacterized protein C9orf9                                                               |

|     |                                                                                                                                                                                                                                                                                                                                  |
|-----|----------------------------------------------------------------------------------------------------------------------------------------------------------------------------------------------------------------------------------------------------------------------------------------------------------------------------------|
| 204 | IPI: IPI00410714.5 SWISS-PROT: P69905 TREMBL: D1MGQ2; E1B2D1; E9LUX2; E9M4D4; Q4ZGM8; Q7Z6G4; Q7Z7B4; Q86YQ5; Q96T46; Q9BX83 ENSEMBL: ENSP00000251595; ENSP00000322421 REFSEQ: NP_000508; NP_000549 H-INV: HIT000273650 VEGA: OTTHUMP00000066291; OTTHUMP00000066501 Tax_Id=9606 Gene_Symbol=HBA2; HBA1 Hemoglobin subunit alpha |
| 205 | IPI: IPI00420108.6 SWISS-PROT: P36957 TREMBL: Q6IBS5 ENSEMBL: ENSP00000335304 REFSEQ: NP_001924 H-INV: HIT000029499 Tax_Id=9606 Gene_Symbol=DLST; DLSTP1 Dihydrolipoyllysine-residue succinyltransferase component of 2-oxoglutarate dehydrogenase complex, mitochondrial                                                        |
| 206 | IPI: IPI00442323.1 TREMBL: Q6ZNF7 Tax_Id=9606 Gene_Symbol=AGAP3 cDNA FLJ16146 fis, clone BRAMY2040159, highly similar to Homo sapiens MRIP-1 mRNA                                                                                                                                                                                |
| 207 | IPI: IPI00455268.4 SWISS-PROT: Q32P41 TREMBL: B2RN19 ENSEMBL: ENSP00000261249 REFSEQ: NP_065861 H-INV: HIT000339023 Tax_Id=9606 Gene_Symbol=TRMT5 tRNA (guanine-N(1)-)-methyltransferase                                                                                                                                         |
| 208 | IPI: IPI00456969.1 SWISS-PROT: Q14204 TREMBL: B4DSR6; Q92862; Q9NRC3 ENSEMBL: ENSP00000348965 REFSEQ: NP_001367 H-INV: HIT000000031 Tax_Id=9606 Gene_Symbol=DYNCIH1 Cytoplasmic dynein 1 heavy chain 1                                                                                                                           |
| 209 | IPI: IPI00465044.2 SWISS-PROT: Q9P258 TREMBL: A5PLK7 ENSEMBL: ENSP00000364582; ENSP00000364585 REFSEQ: NP_001129676; NP_061185 H-INV: HIT000247901 VEGA: OTTHUMP00000002613; OTTHUMP00000002614 Tax_Id=9606 Gene_Symbol=RCC2 Protein RCC2                                                                                        |
| 210 | IPI: IPI00470859.1 TREMBL: Q68D80 Tax_Id=9606 Gene_Symbol=MAN1B1 Putative uncharacterized protein DKFZp686C04126                                                                                                                                                                                                                 |
| 211 | IPI: IPI00478810.1 TREMBL: F6U211 ENSEMBL: ENSP00000363169 VEGA: OTTHUMP00000016230 Tax_Id=9606 Gene_Symbol=RPS10 Uncharacterized protein                                                                                                                                                                                        |
| 212 | IPI: IPI00550243.2 SWISS-PROT: Q9NXG2 TREMBL: B4DFY9; O60362 ENSEMBL: ENSP00000370741; ENSP00000379392 REFSEQ: NP_060206 VEGA: OTTHUMP00000162296 Tax_Id=9606 Gene_Symbol=THUMPD1 THUMP domain-containing protein 1                                                                                                              |
| 213 | IPI: IPI00553006.1 SWISS-PROT: Q7L3T8 ENSEMBL: ENSP00000360327 REFSEQ: NP_689481 H-INV: HIT000035430 VEGA: OTTHUMP00000011559 Tax_Id=9606 Gene_Symbol=PARS2 Probable prolyl-tRNA synthetase, mitochondrial                                                                                                                       |
| 214 | IPI: IPI00554811.2 SWISS-PROT: P59998 ENSEMBL: ENSP00000380431 REFSEQ: NP_005709 H-INV: HIT000261887 VEGA: OTTHUMP00000165252 Tax_Id=9606 Gene_Symbol=ARPC4; ARPC4-TTL3 Actin-related protein 2/3 complex subunit 4                                                                                                              |
| 215 | IPI: IPI00642982.1 TREMBL: A4VCH6; F5GZ27 ENSEMBL: ENSP00000441523 Tax_Id=9606 Gene_Symbol=LONP1 Lon protease homolog                                                                                                                                                                                                            |
| 216 | IPI: IPI00644224.2 TREMBL: B4DLR3 Tax_Id=9606 Gene_Symbol=HNRNPU cDNA FLJ54020, highly similar to Heterogeneous nuclear ribonucleoprotein U                                                                                                                                                                                      |
| 217 | IPI: IPI00644402.1 TREMBL: B4DP08 ENSEMBL: ENSP00000440019 Tax_Id=9606 Gene_Symbol=ALG1 cDNA FLJ61145, highly similar to Chitobiosyldiphosphodolichol beta-mannosyltransferase                                                                                                                                                   |
| 218 | IPI: IPI00645010.1 TREMBL: C9JYS8 ENSEMBL: ENSP00000413350 VEGA: OTTHUMP00000023510 Tax_Id=9606 Gene_Symbol=NONO Uncharacterized protein                                                                                                                                                                                         |
| 219 | IPI: IPI00646512.1 TREMBL: A8K6A2; Q5JP00 ENSEMBL: ENSP00000369424 REFSEQ: NP_001185648 VEGA: OTTHUMP00000022994 Tax_Id=9606 Gene_Symbol=RBBP7 histone-binding protein RBBP7 isoform 1                                                                                                                                           |
| 220 | IPI: IPI00647556.2 TREMBL: B7Z373; B7Z5V1; Q5T0I1; Q69YR8 ENSEMBL: ENSP00000377882; ENSP00000410657; ENSP00000411293 REFSEQ: NP_001121138; NP_001121139 VEGA: OTTHUMP00000022013 Tax_Id=9606 Gene_Symbol=GSN gelsolin isoform c                                                                                                  |
| 221 | IPI: IPI00647650.3 TREMBL: B3KS98; Q53HG0; Q53HR0 ENSEMBL: ENSP00000276682 H-INV: HIT000017995 VEGA: OTTHUMP00000227893 Tax_Id=9606 Gene_Symbol=EIF3H cDNA FLJ35809 fis, clone TESTI2006016, highly similar to Eukaryotic translation initiation factor 3 subunit 3                                                              |
| 222 | IPI: IPI00647915.1 ENSEMBL: ENSP00000357076 VEGA: OTTHUMP00000024408 Tax_Id=9606 Gene_Symbol=TAGLN2 24 kDa protein                                                                                                                                                                                                               |
| 223 | IPI: IPI00657911.2 TREMBL: A1EGU3; E9PBW4; Q14402; Q14412; Q9UJ01 ENSEMBL: ENSP00000369602 VEGA: OTTHUMP00000195208 Tax_Id=9606 Gene_Symbol=HBG2 Uncharacterized protein                                                                                                                                                         |
| 224 | IPI: IPI00747810.3 ENSEMBL: ENSP00000339729 Tax_Id=9606 Gene_Symbol=FSCN1 52 kDa protein                                                                                                                                                                                                                                         |
| 225 | IPI: IPI00748502.2 SWISS-PROT: O75718 TREMBL: B3KME2; B3KS71 ENSEMBL: ENSP00000323696 REFSEQ: NP_006362 H-INV: HIT000244111 VEGA: OTTHUMP00000161311 Tax_Id=9606 Gene_Symbol=CRTAP Cartilage-associated protein                                                                                                                  |
| 226 | IPI: IPI00788837.2 TREMBL: B4DRD7 ENSEMBL: ENSP00000369102 Tax_Id=9606 Gene_Symbol=PCBP2 cDNA FLJ54752, highly similar to Poly(rC)-binding protein 2                                                                                                                                                                             |
| 227 | IPI: IPI00794461.1 SWISS-PROT: Q99877 ENSEMBL: ENSP00000380177; ENSP00000446031 REFSEQ: NP_003511 H-INV: HIT000035226 VEGA: OTTHUMP00000018018 Tax_Id=9606 Gene_Symbol=HIST1H2BN Histone H2B type 1-N                                                                                                                            |

|     |                                                                                                                                                                                                                                           |
|-----|-------------------------------------------------------------------------------------------------------------------------------------------------------------------------------------------------------------------------------------------|
| 228 | IPI: IPI00794746.1 TREMBL:A8MUD9 ENSEMBL:ENSP00000379729;ENSP00000379730;ENSP00000379731 VEGA:OTTHUMP00000166003;OTTHUMP00000166004;OTTHUMP00000166005 Tax_Id=9606 Gene_Symbol=RPL7P32;RPL7 Uncharacterized protein                       |
| 229 | IPI: IPI00796515.1 TREMBL:C9JUL1 ENSEMBL:ENSP00000400923 VEGA:OTTHUMP00000109253 Tax_Id=9606 Gene_Symbol=MX1 Uncharacterized protein                                                                                                      |
| 230 | IPI: IPI00797004.2 ENSEMBL:ENSP00000417370 VEGA:OTTHUMP00000216129 Tax_Id=9606 Gene_Symbol=RUVBL1 Protein                                                                                                                                 |
| 231 | IPI: IPI00797270.4 SWISS-PROT:P60174-1 TREMBL:Q2QD09 ENSEMBL:ENSP00000379933 REFSEQ:NP_000356 Tax_Id=9606 Gene_Symbol=TPI1;TPI1P1 Isoform 1 of Triosephosphate isomerase                                                                  |
| 232 | IPI: IPI00798375.2 TREMBL:B4DLW8;B4DNG2;E7ETL9 ENSEMBL:ENSP00000403085 Tax_Id=9606 Gene_Symbol=DDX5 cDNA FLJ59357, highly similar to Probable ATP-dependent RNA helicase DDX5                                                             |
| 233 | IPI: IPI00844578.1 SWISS-PROT:Q08211 TREMBL:B3KU66;Q12803;Q32Q22;Q6PJK6 ENSEMBL:ENSP00000356520 REFSEQ:NP_001348 H-INV:HIT000385232 VEGA:OTTHUMP00000033287 Tax_Id=9606 Gene_Symbol=DHX9 ATP-dependent RNA helicase A                     |
| 234 | IPI: IPI00847896.1 H-INV:HIT000001657 Tax_Id=9606 Gene_Symbol=GRWD1 Similar to Glutamate-rich WD repeat-containing protein 1                                                                                                              |
| 235 | IPI: IPI00848328.1 H-INV:HIT000332638 Tax_Id=9606 Gene_Symbol=- Similar to Peroxisomal enoyl-coenzyme A hydratase-like protein                                                                                                            |
| 236 | IPI: IPI00872734.3 SWISS-PROT:P45378-1 TREMBL:F8WCM3 ENSEMBL:ENSP00000380468;ENSP00000380476 VEGA:OTTHUMP00000069617 Tax_Id=9606 Gene_Symbol=TNNT3 Uncharacterized protein                                                                |
| 237 | IPI: IPI00877744.1 SWISS-PROT:Q7Z7G1-2 ENSEMBL:ENSP00000390744;ENSP00000427208 VEGA:OTTHUMP00000217415 Tax_Id=9606 Gene_Symbol=CLNK Isoform 2 of Cytokine-dependent hematopoietic cell linker                                             |
| 238 | IPI: IPI00884154.1 H-INV:HIT000044151 Tax_Id=9606 Gene_Symbol=- ENV polyprotein (coat polyprotein) family protein                                                                                                                         |
| 239 | IPI: IPI00890827.1 SWISS-PROT:O00743-2 ENSEMBL:ENSP00000411744 REFSEQ:NP_001116841 Tax_Id=9606 Gene_Symbol=PPP6C Isoform 2 of Serine/threonine-protein phosphatase 6 catalytic subunit                                                    |
| 240 | IPI: IPI00893733.1 ENSEMBL:ENSP00000414806 VEGA:OTTHUMP00000201756 Tax_Id=9606 Gene_Symbol=AGR2 13 kDa protein                                                                                                                            |
| 241 | IPI: IPI00893993.1 TREMBL:F8W950 ENSEMBL:ENSP00000378658 VEGA:OTTHUMP00000201311 Tax_Id=9606 Gene_Symbol=AIMP2 Uncharacterized protein                                                                                                    |
| 242 | IPI: IPI00909956.1 TREMBL:B4DZY9 Tax_Id=9606 Gene_Symbol=- cDNA FLJ59103, highly similar to T-complex protein 1 subunit epsilon                                                                                                           |
| 243 | IPI: IPI00910019.3 TREMBL:B4DP93;E9PHL5 Tax_Id=9606 Gene_Symbol=MVP Uncharacterized protein                                                                                                                                               |
| 244 | IPI: IPI00910267.1 TREMBL:B4DJA6;E7ERW2 ENSEMBL:ENSP00000394100 Tax_Id=9606 Gene_Symbol=GOT2 Aspartate aminotransferase                                                                                                                   |
| 245 | IPI: IPI00910553.1 TREMBL:B4DUK1 Tax_Id=9606 Gene_Symbol=PRDX6 cDNA FLJ51310, moderately similar to Peroxiredoxin-6                                                                                                                       |
| 246 | IPI: IPI00910781.1 TREMBL:B4DE36;B4DG39 ENSEMBL:ENSP00000405573 REFSEQ:NP_001171651 Tax_Id=9606 Gene_Symbol=GPI glucose-6-phosphate isomerase isoform 1                                                                                   |
| 247 | IPI: IPI00916229.1 TREMBL:B4DN45 ENSEMBL:ENSP00000386353 VEGA:OTTHUMP00000204973 Tax_Id=9606 Gene_Symbol=MAT2A S-adenosylmethionine synthase                                                                                              |
| 248 | IPI: IPI00916517.2 ENSEMBL:ENSP00000386735 Tax_Id=9606 Gene_Symbol=HNRNPA2B1 28 kDa protein                                                                                                                                               |
| 249 | IPI: IPI00916922.1 TREMBL:E7ERC4 ENSEMBL:ENSP00000397029 VEGA:OTTHUMP00000204779 Tax_Id=9606 Gene_Symbol=SSB Uncharacterized protein                                                                                                      |
| 250 | IPI: IPI00924816.1 SWISS-PROT:P58546 TREMBL:Q69YG1 ENSEMBL:ENSP00000376800 REFSEQ:NP_665807 H-INV:HIT000028961 VEGA:OTTHUMP00000208354 Tax_Id=9606 Gene_Symbol=MTPN Myotrophin                                                            |
| 251 | IPI: IPI00927308.1 TREMBL:B4DIN9;E7ENF3 ENSEMBL:ENSP00000409766 REFSEQ:NP_001186910 VEGA:OTTHUMP00000206342 Tax_Id=9606 Gene_Symbol=NDUFS1 NADH-ubiquinone oxidoreductase 75 kDa subunit, mitochondrial isoform 2 precursor               |
| 252 | IPI: IPI00927892.1 SWISS-PROT:O75439 TREMBL:B3KM34;B3KQ85;Q96CP5;Q9UG64 ENSEMBL:ENSP00000249269 REFSEQ:NP_004270 H-INV:HIT000001751 VEGA:OTTHUMP00000211704 Tax_Id=9606 Gene_Symbol=PMPCB Mitochondrial-processing peptidase subunit beta |
| 253 | IPI: IPI00929723.1 SWISS-PROT:P57081-2 Tax_Id=9606 Gene_Symbol=WDR4 Isoform 2 of tRNA (guanine-N(7)-)-methyltransferase subunit WDR4                                                                                                      |
| 254 | IPI: IPI00939304.1 SWISS-PROT:O00410-3 ENSEMBL:ENSP00000261574 REFSEQ:NP_002262 H-INV:HIT000325484 VEGA:OTTHUMP00000018583 Tax_Id=9606 Gene_Symbol=IPO5 Isoform 3 of Importin-5                                                           |



|  |     |                                                                                                                                                                                                                                           |
|--|-----|-------------------------------------------------------------------------------------------------------------------------------------------------------------------------------------------------------------------------------------------|
|  | 255 | IPI:IP100939558.2 TREMBL:B3KRG5;Q8N8Y7 ENSEMBL:ENSP00000415250 Tax_Id=9606 Gene_Symbol=RBMX cDNA FLJ38696 fis, clone KIDNE2001931, highly similar to HETEROGENEOUS NUCLEAR RIBONUCLEOPROTEIN G                                            |
|  | 256 | IPI:IP100939560.1 TREMBL:B2RDM2 ENSEMBL:ENSP00000420784 REFSEQ:NP_001139021 VEGA:OTTHUMP00000212222 Tax_Id=9606 Gene_Symbol=TXNDC5;MUTED;MUTED-TXNDC5 thioredoxin domain-containing protein 5 isoform 3                                   |
|  | 257 | IPI:IP100940039.2 TREMBL:B4DMM2 ENSEMBL:ENSP00000397927 Tax_Id=9606 Gene_Symbol=POLDIP3 cDNA FLJ52566, highly similar to Polymerase delta-interacting protein                                                                             |
|  | 258 | IPI:IP100941161.1 SWISS-PROT:O60763-1 TREMBL:F5GZ76 ENSEMBL:ENSP00000264904;ENSP00000446389 REFSEQ:NP_003706 H-INV:HIT000101921 VEGA:OTTHUMP00000237572 Tax_Id=9606 Gene_Symbol=USO1 Isoform 1 of General vesicular transport factor p115 |
|  | 259 | IPI:IP100945782.1 TREMBL:Q96HY3 ENSEMBL:ENSP00000442853;ENSP00000450829 Tax_Id=9606 Gene_Symbol=CALM3;CALM2;CALM1 Uncharacterized protein                                                                                                 |
|  | 260 | IPI:IP100946714.1 TREMBL:C9J2K4 ENSEMBL:ENSP00000417378 REFSEQ:NP_001185838 VEGA:OTTHUMP00000212842 Tax_Id=9606 Gene_Symbol=ATP6V1F V-type proton ATPase subunit F isoform 2                                                              |
|  | 261 | IPI:IP100964335.1 TREMBL:D6RCB3 ENSEMBL:ENSP00000422272 VEGA:OTTHUMP00000224069 Tax_Id=9606 Gene_Symbol=ETF1 Uncharacterized protein                                                                                                      |
|  | 262 | IPI:IP100964598.1 ENSEMBL:ENSP00000422917 VEGA:OTTHUMP00000217152 Tax_Id=9606 Gene_Symbol=COPB2 20 kDa protein                                                                                                                            |
|  | 263 | IPI:IP100965074.1 TREMBL:D6RHD5 ENSEMBL:ENSP00000421027 VEGA:OTTHUMP00000220436 Tax_Id=9606 Gene_Symbol=ALB Uncharacterized protein                                                                                                       |
|  | 264 | IPI:IP100965772.1 ENSEMBL:ENSP00000421457 VEGA:OTTHUMP00000220252 Tax_Id=9606 Gene_Symbol=SNORD73A;RPS3A 22 kDa protein                                                                                                                   |
|  | 265 | IPI:IP100965952.1 TREMBL:D6RAF8 ENSEMBL:ENSP00000421952 VEGA:OTTHUMP00000219403 Tax_Id=9606 Gene_Symbol=HNRNPD Uncharacterized protein                                                                                                    |
|  | 266 | IPI:IP100966238.2 TREMBL:B7Z1V7;B7Z4V2;D6RJI2;Q2F839 ENSEMBL:ENSP00000425598;ENSP00000445065 VEGA:OTTHUMP00000224075 Tax_Id=9606 Gene_Symbol=HSPA9 cDNA FLJ151907, highly similar to Stress-70 protein, mitochondrial                     |
|  | 267 | IPI:IP100966986.1 TREMBL:D6RD47 ENSEMBL:ENSP00000425865;ENSP00000427043 VEGA:OTTHUMP00000222334;OTTHUMP00000222652 Tax_Id=9606 Gene_Symbol=RPS23 Uncharacterized protein                                                                  |
|  | 268 | IPI:IP100968128.1 ENSEMBL:ENSP00000425250 VEGA:OTTHUMP00000218427 Tax_Id=9606 Gene_Symbol=RPL9 Protein                                                                                                                                    |
|  | 269 | IPI:IP100969534.1 TREMBL:D7RXV9;F8RBE1 Tax_Id=9606 Gene_Symbol=- DING protein p38                                                                                                                                                         |
|  | 270 | IPI:IP100982712.1 TREMBL:E5RIF8 ENSEMBL:ENSP00000430738 VEGA:OTTHUMP00000224184 Tax_Id=9606 Gene_Symbol=G3BP1 Uncharacterized protein                                                                                                     |
|  | 271 | IPI:IP100983309.1 TREMBL:E9PNQ1 ENSEMBL:ENSP00000432820 VEGA:OTTHUMP00000231295 Tax_Id=9606 Gene_Symbol=STT3A Uncharacterized protein                                                                                                     |
|  | 272 | IPI:IP100984634.1 TREMBL:E9PNW0 ENSEMBL:ENSP00000437130 VEGA:OTTHUMP00000229320 Tax_Id=9606 Gene_Symbol=NAP1L4 Uncharacterized protein                                                                                                    |
|  | 273 | IPI:IP100984737.1 REFSEQ:NP_001186285 Tax_Id=9606 Gene_Symbol=RPL17-C18ORF32 RPL17-C18orf32 protein isoform 2                                                                                                                             |
|  | 274 | IPI:IP101010419.1 TREMBL:F5H7Y5 ENSEMBL:ENSP00000442173 VEGA:OTTHUMP00000239013 Tax_Id=9606 Gene_Symbol=UBC Uncharacterized protein                                                                                                       |
|  | 275 | IPI:IP101010794.1 SWISS-PROT:Q86V81 ENSEMBL:ENSP00000331817 Tax_Id=9606 Gene_Symbol=THOC4 THO complex subunit 4                                                                                                                           |
|  | 276 | IPI:IP101011410.1 TREMBL:C9JTC4;Q5TF55 ENSEMBL:ENSP00000364484;ENSP00000393209 VEGA:OTTHUMP00000002546 Tax_Id=9606 Gene_Symbol=ALDH4A1 Uncharacterized protein                                                                            |
|  | 277 | IPI:IP101012981.1 TREMBL:B4DNL5;E7EPA8 ENSEMBL:ENSP00000391471 Tax_Id=9606 Gene_Symbol=P4HB cDNA FLJ59361, highly similar to Protein disulfide-isomerase                                                                                  |
|  | 278 | IPI:IP101014211.1 TREMBL:F5H282 ENSEMBL:ENSP00000439447 VEGA:OTTHUMP00000238928 Tax_Id=9606 Gene_Symbol=TCP1 T-complex protein 1 subunit alpha                                                                                            |
|  | 279 | IPI:IP101014808.1 TREMBL:B4DM22;B4DX07;F5GZ16 ENSEMBL:ENSP00000441466 Tax_Id=9606 Gene_Symbol=PSMD2 cDNA FLJ53357, highly similar to 26S proteasome non-ATPase regulatory subunit 2                                                       |
|  | 280 | IPI:IP101022460.1 TREMBL:F8VZ49 ENSEMBL:ENSP00000447782 Tax_Id=9606 Gene_Symbol=HNRNPA1 Uncharacterized protein                                                                                                                           |
|  | 281 | IPI:IP101025425.1 ENSEMBL:ENSP00000451171 Tax_Id=9606 Gene_Symbol=PSMA6 Protein                                                                                                                                                           |
|  | 282 | IPI:IP101025985.1 ENSEMBL:ENSP00000452421 Tax_Id=9606 Gene_Symbol=PNP 24 kDa protein                                                                                                                                                      |
|  | 283 | IPI:IP101026589.1 ENSEMBL:ENSP00000452198 Tax_Id=9606 Gene_Symbol=COQ6 17 kDa protein                                                                                                                                                     |

|       |    |                                                                                                                                                                                                                                                                                 |
|-------|----|---------------------------------------------------------------------------------------------------------------------------------------------------------------------------------------------------------------------------------------------------------------------------------|
| Band3 | 1  | IPI: IPI00032905.3 SWISS-PROT: Q9H267 TREMBL: B7Z1N4;B7Z6M7 ENSEMBL: ENSP00000327650 REFSEQ: NP_061138 H-INV: HIT000076960 VEGA: OTTHUMP00000194751<br>Tax_Id=9606 Gene_Symbol=VPS33B Vacuolar protein sorting-associated protein 33B                                           |
|       | 2  | IPI: IPI00299573.12 SWISS-PROT: P62424 TREMBL: Q5T8U4 ENSEMBL: ENSP00000361076 REFSEQ: NP_000963 H-INV: HIT000050841 VEGA: OTTHUMP00000022469<br>Tax_Id=9606 Gene_Symbol=RPL7A;SNORD24 60S ribosomal protein L7a                                                                |
|       | 3  | IPI: IPI00030179.3 SWISS-PROT: P18124 TREMBL: O95036 ENSEMBL: ENSP00000339795 REFSEQ: NP_000962 H-INV: HIT000034462 VEGA: OTTHUMP00000166002<br>Tax_Id=9606 Gene_Symbol=RPL7P32;RPL7 60S ribosomal protein L7                                                                   |
|       | 4  | IPI: IPI01022801.1 TREMBL: F8VXY0 ENSEMBL: ENSP00000448795 Tax_Id=9606 Gene_Symbol=HNRNPA1 Uncharacterized protein                                                                                                                                                              |
|       | 5  | IPI: IPI00396378.3 SWISS-PROT: P22626-1 ENSEMBL: ENSP00000346694;ENSP00000354021 REFSEQ: NP_112533 H-INV: HIT000195300 VEGA: OTTHUMP00000122511;OTTHUMP00000202466 Tax_Id=9606 Gene_Symbol=HNRNPA2B1 Isoform B1 of Heterogeneous nuclear ribonucleoproteins A2/B1               |
|       | 6  | IPI: IPI00011253.3 SWISS-PROT: P23396 TREMBL: Q53G83;Q9NQS8 ENSEMBL: ENSP00000433821;ENSP00000434643;ENSP00000436971 REFSEQ: NP_000996 H-INV: HIT000287076 VEGA: OTTHUMP00000229804;OTTHUMP00000229805;OTTHUMP00000229882 Tax_Id=9606 Gene_Symbol=RPS3 40S ribosomal protein S3 |
|       | 7  | IPI: IPI00017334.1 SWISS-PROT: P35232 TREMBL: A8K401;Q53FV0;Q6FHP5;Q6PUJ7 ENSEMBL: ENSP00000300408 REFSEQ: NP_002625 H-INV: HIT000298776 VEGA: OTTHUMP00000165764 Tax_Id=9606 Gene_Symbol=PHB Prohibitin                                                                        |
|       | 8  | IPI: IPI00848226.1 SWISS-PROT: P63244 TREMBL: E9KL35 ENSEMBL: ENSP00000426909 REFSEQ: NP_006089 H-INV: HIT000029437 VEGA: OTTHUMP00000223704<br>Tax_Id=9606 Gene_Symbol=GNB2L1 Guanine nucleotide-binding protein subunit beta-2-like 1                                         |
|       | 9  | IPI: IPI00930688.1 SWISS-PROT: P68363 TREMBL: A8JZY9;B3KPS3;B3KT06 ENSEMBL: ENSP00000336799 REFSEQ: NP_006073 H-INV: HIT000291174 Tax_Id=9606<br>Gene_Symbol=TUBA1B Tubulin alpha-1B chain                                                                                      |
|       | 10 | IPI: IPI00027252.6 SWISS-PROT: Q99623 TREMBL: Q9BXV3 ENSEMBL: ENSP00000382362;ENSP00000441875 REFSEQ: NP_001138303;NP_009204 H-INV: HIT000339489 VEGA: OTTHUMP00000238920 Tax_Id=9606 Gene_Symbol=PHB2 Prohibitin-2                                                             |
|       | 11 | IPI: IPI00217030.10 SWISS-PROT: P62701 TREMBL: B2R491;Q53HV1;Q96IR1 ENSEMBL: ENSP00000362744 REFSEQ: NP_000998 H-INV: HIT000195867 VEGA: OTTHUMP0000023537 Tax_Id=9606 Gene_Symbol=RPS4X 40S ribosomal protein S4, X isoform                                                    |
|       | 12 | IPI: IPI00013485.3 SWISS-PROT: P15880 TREMBL: Q3KQT6;Q6IPX5;Q8J014;Q8N5L9 ENSEMBL: ENSP00000341885 REFSEQ: NP_002943 H-INV: HIT000262212 VEGA: OTTHUMP00000158896 Tax_Id=9606 Gene_Symbol=RPS2 40S ribosomal protein S2                                                         |
|       | 13 | IPI: IPI00790342.2 SWISS-PROT: Q02878 TREMBL: B2R4K7;B4DRX3;Q8N5Z7;Q9HBB3 ENSEMBL: ENSP00000202773;ENSP00000403172 REFSEQ: NP_000961;NP_001019833 H-INV: HIT000031725                                                                                                           |
|       | 14 | IPI: IPI01022358.1 TREMBL: Q9UQM3 ENSEMBL: ENSP00000446637 Tax_Id=9606 Gene_Symbol=TUBA1A Alpha-tubulin                                                                                                                                                                         |
|       | 15 | IPI: IPI00795257.3 TREMBL: E7EUT4 ENSEMBL: ENSP00000380067 VEGA: OTTHUMP00000174434 Tax_Id=9606 Gene_Symbol=GAPDH Glyceraldehyde-3-phosphate                                                                                                                                    |
|       | 16 | IPI: IPI00021840.1 SWISS-PROT: P62753 TREMBL: A2A3R6;Q96DV6 ENSEMBL: ENSP00000369757 REFSEQ: NP_001001 H-INV: HIT000278246 VEGA: OTTHUMP00000021120<br>Tax_Id=9606 Gene_Symbol=RPS6 40S ribosomal protein S6                                                                    |
|       | 17 | IPI: IPI00007188.6 SWISS-PROT: P05141 TREMBL: B2RCV1;Q6NVC0 ENSEMBL: ENSP00000360671 REFSEQ: NP_001143 H-INV: HIT000054137 VEGA: OTTHUMP00000024324<br>Tax_Id=9606 Gene_Symbol=SLC25A5 ADP/ATP translocase 2                                                                    |
|       | 18 | IPI: IPI00419880.6 SWISS-PROT: P61247 TREMBL: A8K4W0;Q6NXR8 ENSEMBL: ENSP00000346050 REFSEQ: NP_000997 H-INV: HIT000030591 VEGA: OTTHUMP00000220241<br>Tax_Id=9606 Gene_Symbol=SNORD73A;RPS3A 40S ribosomal protein S3a                                                         |
|       | 19 | IPI: IPI00218343.4 SWISS-PROT: Q9BQE3 ENSEMBL: ENSP00000301072 REFSEQ: NP_116093 H-INV: HIT000279007 Tax_Id=9606 Gene_Symbol=TUBA1C Tubulin alpha-1C chain                                                                                                                      |
|       | 20 | IPI: IPI00021440.1 SWISS-PROT: P63261 ENSEMBL: ENSP00000331514 REFSEQ: NP_001186883;NP_001605 H-INV: HIT000274927 Tax_Id=9606 Gene_Symbol=ACTG1 Actin, cytoplasmic 2                                                                                                            |
|       | 21 | IPI: IPI00000494.6 SWISS-PROT: P46777 TREMBL: A2RUM7;Q59GX9;Q9BUV4 ENSEMBL: ENSP00000359345 REFSEQ: NP_000960 H-INV: HIT000291718 VEGA: OTTHUMP00000012584 Tax_Id=9606 Gene_Symbol=SNORD21;RPL5 60S ribosomal protein L5                                                        |
|       | 22 | IPI: IPI00022891.3 SWISS-PROT: P12235 TREMBL: A8K787 ENSEMBL: ENSP00000281456 REFSEQ: NP_001142 H-INV: HIT000033884 VEGA: OTTHUMP00000165924<br>Tax_Id=9606 Gene_Symbol=SLC25A4 ADP/ATP translocase 1                                                                           |

|  |    |                                                                                                                                                                                                                                                                                                                                                                                                                           |
|--|----|---------------------------------------------------------------------------------------------------------------------------------------------------------------------------------------------------------------------------------------------------------------------------------------------------------------------------------------------------------------------------------------------------------------------------|
|  | 23 | IPI: IPI00291467.7 SWISS-PROT: P12236 TREMBL: O75961; Q59EI9; Q6I9V5 ENSEMBL: ENSP00000370808 REFSEQ: NP_001627 VEGA: OTTHUMP00000022826 Tax_Id=9606 Gene_Symbol=SLC25A6 ADP/ATP translocase 3                                                                                                                                                                                                                            |
|  | 24 | IPI: IPI00975850.1 TREMBL: E9PIZ3 ENSEMBL: ENSP00000431931 VEGA: OTTHUMP00000229069 Tax_Id=9606 Gene_Symbol=RPL8 Uncharacterized protein                                                                                                                                                                                                                                                                                  |
|  | 25 | IPI: IPI00009368.4 SWISS-PROT: Q9H9B4 ENSEMBL: ENSP00000316905 REFSEQ: NP_073591 H-INV: HIT000260791 VEGA: OTTHUMP00000161114 Tax_Id=9606 Gene_Symbol=SFXN1 Sideroflexin-1                                                                                                                                                                                                                                                |
|  | 26 | IPI: IPI00026689.4 SWISS-PROT: P06493-1 TREMBL: Q5H9N4 ENSEMBL: ENSP00000378699 REFSEQ: NP_001777 H-INV: HIT000321130 VEGA: OTTHUMP00000019659 Tax_Id=9606 Gene_Symbol=CDK1 Putative uncharacterized protein DKFZp686L20222                                                                                                                                                                                               |
|  | 27 | IPI: IPI01017942.1 ENSEMBL: ENSP00000397973 VEGA: OTTHUMP00000223862 Tax_Id=9606 Gene_Symbol=CDK1 34 kDa protein                                                                                                                                                                                                                                                                                                          |
|  | 28 | IPI: IPI00011913.1 SWISS-PROT: Q13151 ENSEMBL: ENSP00000316042 REFSEQ: NP_006796 H-INV: HIT000038484 VEGA: OTTHUMP00000159432 Tax_Id=9606 Gene_Symbol=HNRNPA0 Heterogeneous nuclear ribonucleoprotein A0                                                                                                                                                                                                                  |
|  | 29 | IPI: IPI00007752.1 SWISS-PROT: P68371 TREMBL: Q8IWP6; Q8IZ29; Q8N6N5; Q96HX0 ENSEMBL: ENSP00000341289 REFSEQ: NP_006079 H-INV: HIT000009868 VEGA: OTTHUMP00000162590 Tax_Id=9606 Gene_Symbol=TUBB2C Tubulin beta-2C chain                                                                                                                                                                                                 |
|  | 30 | IPI: IPI00930343.1 TREMBL: A8K3K1 Tax_Id=9606 Gene_Symbol=ACTC1 cDNA FL178096, highly similar to Homo sapiens actin, alpha, cardiac muscle (ACTC), mRNA                                                                                                                                                                                                                                                                   |
|  | 31 | IPI: IPI00646909.2 SWISS-PROT: Q9NY65 ENSEMBL: ENSP0000033326 REFSEQ: NP_061816 H-INV: HIT000245906 VEGA: OTTHUMP00000196216 Tax_Id=9606 Gene_Symbol=TUBA8 Tubulin alpha-8 chain                                                                                                                                                                                                                                          |
|  | 32 | IPI: IPI01020686.1 TREMBL: F8VW92 ENSEMBL: ENSP00000449827 Tax_Id=9606 Gene_Symbol=TUBB Uncharacterized protein                                                                                                                                                                                                                                                                                                           |
|  | 33 | IPI: IPI00478410.2 SWISS-PROT: P36542-1 TREMBL: Q6I9V2; Q8TAS0 ENSEMBL: ENSP00000349142 REFSEQ: NP_001001973 H-INV: HIT000100602 VEGA: OTTHUMP00000019068 Tax_Id=9606 Gene_Symbol=ATP5C1 Isoform Liver of ATP synthase subunit gamma, mitochondrial                                                                                                                                                                       |
|  | 34 | IPI: IPI00219217.3 SWISS-PROT: P07195 TREMBL: Q5U077 ENSEMBL: ENSP00000229319; ENSP00000379386 REFSEQ: NP_001167568; NP_002291 H-INV: HIT000037014 VEGA: OTTHUMP00000165228; OTTHUMP00000165229 Tax_Id=9606 Gene_Symbol=LDHB L-lactate dehydrogenase B chain                                                                                                                                                              |
|  | 35 | IPI: IPI00025039.1 SWISS-PROT: P22087 TREMBL: B4DLD4; Q96BS4 ENSEMBL: ENSP00000221801 REFSEQ: NP_001427 H-INV: HIT000038585 Tax_Id=9606 Gene_Symbol=FBL rRNA 2'-O-methyltransferase fibrillar                                                                                                                                                                                                                             |
|  | 36 | IPI: IPI00945233.1 REFSEQ: NP_001158889 Tax_Id=9606 Gene_Symbol=SLC25A11 mitochondrial 2-oxoglutarate/malate carrier protein isoform 2                                                                                                                                                                                                                                                                                    |
|  | 37 | IPI: IPI00025491.1 SWISS-PROT: P60842 TREMBL: A8K088; A8K7F6; B4DNH2; Q9NZR9 ENSEMBL: ENSP00000293831 REFSEQ: NP_001407 H-INV: HIT000281563; HIT000333951 VEGA: OTTHUMP00000135288 Tax_Id=9606 Gene_Symbol=EIF4A1 Eukaryotic initiation factor 4A-I                                                                                                                                                                       |
|  | 38 | IPI: IPI00217966.9 SWISS-PROT: P00338-1 ENSEMBL: ENSP00000368722; ENSP00000395337; ENSP00000445331 REFSEQ: NP_005557 H-INV: HIT000049306 VEGA: OTTHUMP00000165205; OTTHUMP00000236646; OTTHUMP00000236647 Tax_Id=9606 Gene_Symbol=LDHA Isoform 1 of L-lactate dehydrogenase A chain                                                                                                                                       |
|  | 39 | IPI: IPI00955780.1 TREMBL: D3DR22 Tax_Id=9606 Gene_Symbol=- Hydroxysteroid (17-beta) dehydrogenase 12, isoform CRA_a                                                                                                                                                                                                                                                                                                      |
|  | 40 | IPI: IPI01025117.1 ENSEMBL: ENSP00000452514 Tax_Id=9606 Gene_Symbol=CDK2 39 kDa protein                                                                                                                                                                                                                                                                                                                                   |
|  | 41 | IPI: IPI00954934.1 TREMBL: F5GXG4 ENSEMBL: ENSP00000409537; ENSP00000440372 REFSEQ: NP_001164015 H-INV: HIT000098830 VEGA: OTTHUMP00000237615; OTTHUMP00000237616 Tax_Id=9606 Gene_Symbol=PGAM5 serine/threonine-protein phosphatase PGAM5, mitochondrial isoform 2                                                                                                                                                       |
|  | 42 | IPI: IPI00396485.3 SWISS-PROT: P68104 TREMBL: A8K9C4; B4DV42; B4E2C5; Q16577; Q53G85; Q53G89; Q53GA1; Q53GE9; Q53HM9; Q53HQ7; Q53HR1; Q53HR5; Q6IPN6; Q6IPS9; Q6IPT9; Q8IUB0; Q96RE1; Q9H2I7 ENSEMBL: ENSP00000330054; ENSP00000339053; ENSP00000339063 REFSEQ: NP_001393 H-INV: HIT000279745 VEGA: OTTHUMP00000016736; OTTHUMP00000063804; OTTHUMP00000063805 Tax_Id=9606 Gene_Symbol=EEF1A1 Elongation factor 1-alpha 1 |
|  | 43 | IPI: IPI00217467.3 SWISS-PROT: P10412 TREMBL: A3R0T7; A3R0T8; B2R984; Q4VB24 ENSEMBL: ENSP00000307705 REFSEQ: NP_005312 H-INV: HIT000335456 VEGA: OTTHUMP00000016139 Tax_Id=9606 Gene_Symbol=HIST1H1E Histone H1.4                                                                                                                                                                                                        |
|  | 44 | IPI: IPI00014898.3 SWISS-PROT: Q15149-1 ENSEMBL: ENSP00000323856 REFSEQ: NP_958782 VEGA: OTTHUMP00000229284 Tax_Id=9606 Gene_Symbol=PLEC Isoform 1 of Plectin                                                                                                                                                                                                                                                             |

|  |    |                                                                                                                                                                                                                                                                                                          |
|--|----|----------------------------------------------------------------------------------------------------------------------------------------------------------------------------------------------------------------------------------------------------------------------------------------------------------|
|  | 45 | IPI: IPI00031804.1 SWISS-PROT: Q9Y277-1 ENSEMBL: ENSP00000022615 REFSEQ: NP_005653 H-INV: HIT000001729 VEGA: OTTHUMP00000226060 Tax_Id=9606<br>Gene_Symbol=VDAC3 Isoform 1 of Voltage-dependent anion-selective channel protein 3                                                                        |
|  | 46 | IPI: IPI00215777.1 SWISS-PROT: Q00325-2 TREMBL: B2RE88; Q53HC3; Q8NCF7 ENSEMBL: ENSP00000188376; ENSP00000383898; ENSP00000447740; ENSP00000448708 REFSEQ: NP_002626; NP_998776 Tax_Id=9606<br>Gene_Symbol=SLC25A3 Isoform B of Phosphate carrier protein, mitochondrial                                 |
|  | 47 | IPI: IPI00219616.7 SWISS-PROT: P60891 TREMBL: B2R6T7 ENSEMBL: ENSP00000361512; ENSP00000443185 REFSEQ: NP_002755 H-INV: HIT000321498 VEGA: OTTHUMP00000023807 Tax_Id=9606 Gene_Symbol=PRPS1 Ribose-phosphate pyrophosphokinase 1                                                                         |
|  | 48 | IPI: IPI00014230.1 SWISS-PROT: Q07021 TREMBL: A8K651 ENSEMBL: ENSP00000225698 REFSEQ: NP_001203 H-INV: HIT000286556 Tax_Id=9606 Gene_Symbol=C1QBP<br>Complement component 1 Q subcomponent-binding protein, mitochondrial                                                                                |
|  | 49 | IPI: IPI00216308.5 SWISS-PROT: P21796 TREMBL: B3KTS5 ENSEMBL: ENSP00000265333; ENSP00000378484; ENSP00000378487 REFSEQ: NP_003365 H-INV: HIT000042826 VEGA: OTTHUMP00000159381; OTTHUMP00000165946; OTTHUMP00000165947 Tax_Id=9606 Gene_Symbol=VDAC1 Voltage-dependent anion-selective channel protein 1 |
|  | 50 | IPI: IPI00218782.3 TREMBL: B1AK88; B2R7T8; B4DWA6; E7EQ40 ENSEMBL: ENSP00000364287; ENSP00000401010 VEGA: OTTHUMP00000002656 Tax_Id=9606<br>Gene_Symbol=CAPZB cDNA FLJ60094, highly similar to F-actin capping protein subunit beta                                                                      |
|  | 51 | IPI: IPI00718888.1 SWISS-PROT: P11908-2 ENSEMBL: ENSP00000381504 REFSEQ: NP_001034180 VEGA: OTTHUMP00000214964 Tax_Id=9606 Gene_Symbol=PRPS2 Isoform 2 of Ribose-phosphate pyrophosphokinase 2                                                                                                           |
|  | 52 | IPI: IPI00917420.1 ENSEMBL: ENSP00000298468 VEGA: OTTHUMP00000019878 Tax_Id=9606 Gene_Symbol=VDAC2 30 kDa protein                                                                                                                                                                                        |
|  | 53 | IPI: IPI00027423.3 TREMBL: Q07161 ENSEMBL: ENSP00000326031 REFSEQ: NP_001008709 VEGA: OTTHUMP00000236398 Tax_Id=9606 Gene_Symbol=PPP1CA<br>serine/threonine-protein phosphatase PP1-alpha catalytic subunit isoform 3                                                                                    |
|  | 54 | IPI: IPI01022713.1 TREMBL: F8W0W8 ENSEMBL: ENSP00000447122 Tax_Id=9606 Gene_Symbol=PPP1CC Uncharacterized protein                                                                                                                                                                                        |
|  | 55 | IPI: IPI00784154.1 SWISS-PROT: P10809 TREMBL: B3GQS7; B7Z4F6; B7Z532; B7Z597; B9VP19; B9VPB4; Q53SE2 ENSEMBL: ENSP00000340019; ENSP00000373620 REFSEQ: NP_002147; NP_955472 H-INV: HIT000031088 VEGA: OTTHUMP00000205744 Tax_Id=9606 Gene_Symbol=HSPD1 60 kDa heat shock protein, mitochondrial          |
|  | 56 | IPI: IPI00018219.1 SWISS-PROT: Q15582 ENSEMBL: ENSP00000416330 REFSEQ: NP_000349 H-INV: HIT000029343 VEGA: OTTHUMP00000223339 Tax_Id=9606<br>Gene_Symbol=TGFBI Transforming growth factor-beta-induced protein ig-h3                                                                                     |
|  | 57 | IPI: IPI00009659.3 SWISS-PROT: Q9NQG5 ENSEMBL: ENSP00000362532 REFSEQ: NP_067038 H-INV: HIT000041874 VEGA: OTTHUMP00000030953 Tax_Id=9606<br>Gene_Symbol=RPRD1B Regulation of nuclear pre-mRNA domain-containing protein 1B                                                                              |
|  | 58 | IPI: IPI00024067.4 SWISS-PROT: Q00610-1 TREMBL: Q49AL0 ENSEMBL: ENSP00000269122 REFSEQ: NP_004850 H-INV: HIT000054067 VEGA: OTTHUMP00000165784<br>Tax_Id=9606 Gene_Symbol=CLTC Isoform 1 of Clathrin heavy chain 1                                                                                       |
|  | 59 | IPI: IPI00060181.1 SWISS-PROT: Q96C19 ENSEMBL: ENSP00000365147 REFSEQ: NP_077305 H-INV: HIT000090812 VEGA: OTTHUMP00000002319 Tax_Id=9606<br>Gene_Symbol=EFHD2 EF-hand domain-containing protein D2                                                                                                      |
|  | 60 | IPI: IPI00303476.1 SWISS-PROT: P06576 TREMBL: Q0QEN7 ENSEMBL: ENSP00000262030 REFSEQ: NP_001677 H-INV: HIT000279396 Tax_Id=9606 Gene_Symbol=ATP5B ATP synthase subunit beta, mitochondrial                                                                                                               |
|  | 61 | IPI: IPI00465132.4 SWISS-PROT: O14579 TREMBL: Q53HJ6; Q7Z4Z1; Q9UGP6 ENSEMBL: ENSP00000262812 REFSEQ: NP_009194 H-INV: HIT000272072 Tax_Id=9606<br>Gene_Symbol=COPE Coatomer subunit epsilon                                                                                                             |
|  | 62 | IPI: IPI00815784.1 TREMBL: Q6I9T8 Tax_Id=9606 Gene_Symbol=PPP2CA Serine/threonine-protein phosphatase                                                                                                                                                                                                    |
|  | 63 | IPI: IPI00940851.1 SWISS-PROT: Q15717 ENSEMBL: ENSP00000385269 REFSEQ: NP_001410 H-INV: HIT000031527 Tax_Id=9606 Gene_Symbol=ELAVL1 ELAV-like protein 1                                                                                                                                                  |
|  | 64 | IPI: IPI00027463.1 SWISS-PROT: P06703 TREMBL: B2R577 ENSEMBL: ENSP00000357708; ENSP00000357709 REFSEQ: NP_055439 H-INV: HIT000034143 VEGA: OTTHUMP00000015472; OTTHUMP00000015473 Tax_Id=9606 Gene_Symbol=S100A6 Protein S100-A6                                                                         |
|  | 65 | IPI: IPI00292020.3 SWISS-PROT: P19623 ENSEMBL: ENSP00000366156 REFSEQ: NP_003123 H-INV: HIT000269401 VEGA: OTTHUMP00000002170 Tax_Id=9606<br>Gene_Symbol=SRM Spermidine synthase                                                                                                                         |

|    |                                                                                                                                                                                                                                                                                                                               |
|----|-------------------------------------------------------------------------------------------------------------------------------------------------------------------------------------------------------------------------------------------------------------------------------------------------------------------------------|
| 66 | IPI: IPI00003925.6 SWISS-PROT: P11177-1 ENSEMBL: ENSP00000307241 REFSEQ: NP_000916 H-INV: HIT000384751 VEGA: OTTHUMP00000214202 Tax_Id=9606 Gene_Symbol=PDHB Isoform 1 of Pyruvate dehydrogenase E1 component subunit beta, mitochondrial                                                                                     |
| 67 | IPI: IPI00005969.3 SWISS-PROT: P52907 TREMBL: A8K0T9 ENSEMBL: ENSP00000263168 REFSEQ: NP_006126 H-INV: HIT000057385 VEGA: OTTHUMP00000013512 Tax_Id=9606 Gene_Symbol=CAPZA1 F-actin-capping protein subunit alpha-1                                                                                                           |
| 68 | IPI: IPI00221300.2 SWISS-PROT: Q14232 ENSEMBL: ENSP00000416250 REFSEQ: NP_001405 H-INV: HIT000337355 VEGA: OTTHUMP00000239201 Tax_Id=9606 Gene_Symbol=EIF2B1 Translation initiation factor eIF-2B subunit alpha                                                                                                               |
| 69 | IPI: IPI00000816.1 SWISS-PROT: P62258-1 ENSEMBL: ENSP00000264335 REFSEQ: NP_006752 H-INV: HIT000048658 VEGA: OTTHUMP00000166035 Tax_Id=9606 Gene_Symbol=YWHAE Isoform 1 of 14-3-3 protein epsilon                                                                                                                             |
| 70 | IPI: IPI00007089.1 SWISS-PROT: O95478 TREMBL: Q5J7U2 ENSEMBL: ENSP00000296802 REFSEQ: NP_055701 H-INV: HIT000066226 VEGA: OTTHUMP00000161947 Tax_Id=9606 Gene_Symbol=NSA2 Ribosome biogenesis protein NSA2 homolog                                                                                                            |
| 71 | IPI: IPI00008530.1 SWISS-PROT: P05388 TREMBL: A8K4Z4; B4E3D5; Q3MHV2; Q53HK9; Q53HW2 ENSEMBL: ENSP00000339027; ENSP00000376299; ENSP00000449328 REFSEQ: NP_000993; NP_444505 H-INV: HIT000049094 Tax_Id=9606 Gene_Symbol=RPLP0 60S acidic ribosomal protein P0                                                                |
| 72 | IPI: IPI00102425.1 SWISS-PROT: Q96P16-1 ENSEMBL: ENSP00000349955; ENSP00000381984 REFSEQ: NP_060640 VEGA: OTTHUMP00000163414 Tax_Id=9606 Gene_Symbol=RPRD1A Isoform 1 of Regulation of nuclear pre-mRNA domain-containing protein 1A                                                                                          |
| 73 | IPI: IPI00550021.4 SWISS-PROT: P39023 TREMBL: Q96QL0 ENSEMBL: ENSP00000346001 REFSEQ: NP_000958 H-INV: HIT000338841 VEGA: OTTHUMP00000199074 Tax_Id=9606 Gene_Symbol=SNORD43; RPL3 60S ribosomal protein L3                                                                                                                   |
| 74 | IPI: IPI00790627.2 TREMBL: F8VYL7 ENSEMBL: ENSP00000448927 REFSEQ: NP_001122384 Tax_Id=9606 Gene_Symbol=PCBP2 poly(rC)-binding protein 2 isoform e                                                                                                                                                                            |
| 75 | IPI: IPI00796864.1 TREMBL: E9PBD4; Q5QPK0 ENSEMBL: ENSP00000360640; ENSP00000412453 VEGA: OTTHUMP00000031286 Tax_Id=9606 Gene_Symbol=DPM1 Uncharacterized protein                                                                                                                                                             |
| 76 | IPI: IPI00909232.1 TREMBL: B4DY08 ENSEMBL: ENSP00000338095; ENSP00000450548 Tax_Id=9606 Gene_Symbol=HNRNPC cDNA FLJ53542, highly similar to Heterogeneous nuclear ribonucleoproteins C                                                                                                                                        |
| 77 | IPI: IPI01018037.1 TREMBL: Q59GW7 REFSEQ: NP_001193730 Tax_Id=9606 Gene_Symbol=RFC5 replication factor C subunit 5 isoform 4                                                                                                                                                                                                  |
| 78 | IPI: IPI00003865.1 SWISS-PROT: P11142-1 TREMBL: B3KTV0; B4E1Q1; Q53GZ6; Q96IS6 ENSEMBL: ENSP00000227378; ENSP00000432083; ENSP00000437125 REFSEQ: NP_006588 H-INV: HIT000037619 VEGA: OTTHUMP00000231743; OTTHUMP00000231745; OTTHUMP00000231747 Tax_Id=9606 Gene_Symbol=HSPA8 Isoform 1 of Heat shock cognate 71 kDa protein |
| 79 | IPI: IPI00376005.2 SWISS-PROT: P63241-2 ENSEMBL: ENSP00000336702 REFSEQ: NP_001137232 H-INV: HIT000250756 Tax_Id=9606 Gene_Symbol=EIF5A Isoform 2 of Eukaryotic translation initiation factor 5A-1                                                                                                                            |
| 80 | IPI: IPI00186290.6 SWISS-PROT: P13639 TREMBL: Q6PK56; Q8TA90 ENSEMBL: ENSP00000307940 REFSEQ: NP_001952 H-INV: HIT000326370 Tax_Id=9606 Gene_Symbol=EEF2 Elongation factor 2                                                                                                                                                  |
| 81 | IPI: IPI00465248.5 SWISS-PROT: P06733-1 TREMBL: A4UCS8 ENSEMBL: ENSP00000234590 REFSEQ: NP_001419 H-INV: HIT000270987 VEGA: OTTHUMP00000001706 Tax_Id=9606 Gene_Symbol=ENO1 Isoform alpha-enolase of Alpha-enolase                                                                                                            |
| 82 | IPI: IPI00910979.1 TREMBL: B4DUU6 ENSEMBL: ENSP00000403365 REFSEQ: NP_001193727 Tax_Id=9606 Gene_Symbol=PKM2 pyruvate kinase isozymes M1/M2 isoform e                                                                                                                                                                         |
| 83 | IPI: IPI00013895.1 SWISS-PROT: P31949 TREMBL: B2R5H0 ENSEMBL: ENSP00000271638 REFSEQ: NP_005611 H-INV: HIT000101457 VEGA: OTTHUMP00000015271 Tax_Id=9606 Gene_Symbol=S100A11 Protein S100-A11                                                                                                                                 |
| 84 | IPI: IPI00004459.1 SWISS-PROT: Q9UNQ2 TREMBL: A8K9K8 ENSEMBL: ENSP00000199320 REFSEQ: NP_055288 H-INV: HIT000277524 VEGA: OTTHUMP00000161884 Tax_Id=9606 Gene_Symbol=DIMT1 Probable dimethyladenosine transferase                                                                                                             |
| 85 | IPI: IPI00216493.1 SWISS-PROT: P31942-3 Tax_Id=9606 Gene_Symbol=HNRNPH3 Isoform 3 of Heterogeneous nuclear ribonucleoprotein H3                                                                                                                                                                                               |
| 86 | IPI: IPI00003968.1 SWISS-PROT: Q16795 TREMBL: A8K4V2; Q9BTT5 ENSEMBL: ENSP00000266544 REFSEQ: NP_004993 H-INV: HIT000298026 VEGA: OTTHUMP00000238362 Tax_Id=9606 Gene_Symbol=NDUFA9 NADH dehydrogenase [ubiquinone] 1 alpha subcomplex subunit 9, mitochondrial                                                               |

|     |                                                                                                                                                                                                                                                                                                                                                                                                                                                                                                                            |
|-----|----------------------------------------------------------------------------------------------------------------------------------------------------------------------------------------------------------------------------------------------------------------------------------------------------------------------------------------------------------------------------------------------------------------------------------------------------------------------------------------------------------------------------|
| 87  | IPI:IPI00021700.3 SWISS-PROT:P12004 TREMBL:B4DUA2;Q6FHF5;Q6FI35;Q7Z6A1;Q7Z6A2;Q7Z6A3 ENSEMBL:ENSP00000368438;ENSP00000368458 REFSEQ:NP_002583;NP_872590 H-INV:HIT000298775 VEGA:OTTHUMP00000030189;OTTHUMP00000030190 Tax_Id=9606 Gene_Symbol=PCNA;PCNA-AS1 Proliferating cell nuclear antigen                                                                                                                                                                                                                             |
| 88  | IPI:IPI00026182.5 SWISS-PROT:P47755 TREMBL:A4D0V4;A8MW68;Q53GC7;Q53GE2 ENSEMBL:ENSP00000354947 REFSEQ:NP_006127 H-INV:HIT000286766 VEGA:OTTHUMP00000024803 Tax_Id=9606 Gene_Symbol=CAPZA2 F-actin-capping protein subunit alpha-2                                                                                                                                                                                                                                                                                          |
| 89  | IPI:IPI00297477.3 SWISS-PROT:P09661 TREMBL:Q53G21;Q53G61 ENSEMBL:ENSP00000254193 REFSEQ:NP_003081 H-INV:HIT000039644 VEGA:OTTHUMP00000194836 Tax_Id=9606 Gene_Symbol=SNRPA1 U2 small nuclear ribonucleoprotein A'                                                                                                                                                                                                                                                                                                          |
| 90  | IPI:IPI00446235.2 SWISS-PROT:P00387-2 TREMBL:Q6TGM4;Q6TGM5;Q6ZVI6 ENSEMBL:ENSP00000379597;ENSP00000384457;ENSP00000384834;ENSP00000385679 REFSEQ:NP_001123291;NP_001165132;NP_015565 VEGA:OTTHUMP00000198435;OTTHUMP00000198574;OTTHUMP00000198665 Tax_Id=9606 Gene_Symbol=CYB5R3 Isoform 2 of NADH-cytochrome b5 reductase 3                                                                                                                                                                                              |
| 91  | IPI:IPI00456940.5 SWISS-PROT:Q6DKI1 TREMBL:A8K515;B3KMP5 ENSEMBL:ENSP00000346063;ENSP00000418221 REFSEQ:NP_940888 H-INV:HIT000005178 VEGA:OTTHUMP00000016410;OTTHUMP00000195524 Tax_Id=9606 Gene_Symbol=RPL7L1 60S ribosomal protein L7-like 1                                                                                                                                                                                                                                                                             |
| 92  | IPI:IPI00471928.6 TREMBL:A8K092;B4DGW3 ENSEMBL:ENSP00000440198 Tax_Id=9606 Gene_Symbol=ATP5A1 ATP synthase subunit alpha                                                                                                                                                                                                                                                                                                                                                                                                   |
| 93  | IPI:IPI00552214.1 TREMBL:Q5HY57 ENSEMBL:ENSP00000358850 VEGA:OTTHUMP00000064894 Tax_Id=9606 Gene_Symbol=EMD Uncharacterized protein                                                                                                                                                                                                                                                                                                                                                                                        |
| 94  | IPI:IPI00982101.1 TREMBL:E7EX29 ENSEMBL:ENSP00000430058 VEGA:OTTHUMP00000227485 Tax_Id=9606 Gene_Symbol=YWHAZ Uncharacterized protein                                                                                                                                                                                                                                                                                                                                                                                      |
| 95  | IPI:IPI00382470.3 SWISS-PROT:P07900-2 TREMBL:Q86SX1 ENSEMBL:ENSP00000335153 REFSEQ:NP_001017963 Tax_Id=9606 Gene_Symbol=HSP90AA1 Isoform 2 of Heat shock protein HSP 90-alpha                                                                                                                                                                                                                                                                                                                                              |
| 96  | IPI:IPI00329573.9 SWISS-PROT:Q99715-1 TREMBL:B9EJB8 ENSEMBL:ENSP00000325146 REFSEQ:NP_004361 H-INV:HIT000221229 VEGA:OTTHUMP00000016752 Tax_Id=9606 Gene_Symbol=COL12A1 Isoform 1 of Collagen alpha-1(XII) chain                                                                                                                                                                                                                                                                                                           |
| 97  | IPI:IPI00414676.6 SWISS-PROT:P08238 TREMBL:A8K3W9;B4DGL0;B4DMA2;Q6PK50;Q9H6X9 ENSEMBL:ENSP00000325875;ENSP00000360609;ENSP00000360709 REFSEQ:NP_031381 H-INV:HIT000253179 VEGA:OTTHUMP00000016517;OTTHUMP00000016518;OTTHUMP00000016519 Tax_Id=9606 Gene_Symbol=HSP90AB1 Heat shock protein HSP 90-beta                                                                                                                                                                                                                    |
| 98  | IPI:IPI00304925.5 SWISS-PROT:P08107 TREMBL:A8K5I0 ENSEMBL:ENSP00000364801;ENSP00000364802;ENSP00000375391;ENSP00000375399;ENSP00000393087;ENSP00000403530;ENSP00000404524;ENSP00000406359;ENSP00000408907 REFSEQ:NP_005336;NP_005337 H-INV:HIT000038434;HIT000260966 VEGA:OTTHUMP00000014656;OTTHUMP00000029287;OTTHUMP00000029288;OTTHUMP00000029727;OTTHUMP00000029728;OTTHUMP00000193056;OTTHUMP00000193058;OTTHUMP00000193422;OTTHUMP00000193424 Tax_Id=9606 Gene_Symbol=HSPA1B;HSPA1A Heat shock 70 kDa protein 1A/1B |
| 99  | IPI:IPI01021326.1 TREMBL:F8VRZ3 ENSEMBL:ENSP00000448726 Tax_Id=9606 Gene_Symbol=PA2G4 Uncharacterized protein                                                                                                                                                                                                                                                                                                                                                                                                              |
| 100 | IPI:IPI00018465.1 SWISS-PROT:Q99832 TREMBL:Q53HV2;Q6IBT3 ENSEMBL:ENSP00000258091 REFSEQ:NP_006420 H-INV:HIT000266185 VEGA:OTTHUMP00000202321 Tax_Id=9606 Gene_Symbol=CCT7 T-complex protein 1 subunit eta                                                                                                                                                                                                                                                                                                                  |
| 101 | IPI:IPI00643920.4 TREMBL:B4DE31;E7EPA7 ENSEMBL:ENSP00000391481 VEGA:OTTHUMP00000212667 Tax_Id=9606 Gene_Symbol=TKT cDNA FLJ54957, highly similar to Transketolase                                                                                                                                                                                                                                                                                                                                                          |
| 102 | IPI:IPI00011416.2 SWISS-PROT:Q13011 ENSEMBL:ENSP00000221418 REFSEQ:NP_001389 H-INV:HIT000035456 Tax_Id=9606 Gene_Symbol=ECH1 Delta(3,5)-Delta(2,4)-dienoyl-CoA isomerase, mitochondrial                                                                                                                                                                                                                                                                                                                                    |
| 103 | IPI:IPI00179964.5 SWISS-PROT:P26599-1 ENSEMBL:ENSP00000014112 REFSEQ:NP_114368 Tax_Id=9606 Gene_Symbol=PTBP1 Isoform 1 of Polypyrimidine tract-binding protein 1                                                                                                                                                                                                                                                                                                                                                           |
| 104 | IPI:IPI00215884.4 SWISS-PROT:Q07955-1 TREMBL:A8K1L8 ENSEMBL:ENSP00000258962 REFSEQ:NP_008855 H-INV:HIT000059870 Tax_Id=9606 Gene_Symbol=SRSF1 Isoform ASF-1 of Serine/arginine-rich splicing factor 1                                                                                                                                                                                                                                                                                                                      |
| 105 | IPI:IPI00289758.7 SWISS-PROT:P17655 TREMBL:B4DN77 ENSEMBL:ENSP00000295006 REFSEQ:NP_001739 H-INV:HIT000194882 VEGA:OTTHUMP00000035497 Tax_Id=9606 Gene_Symbol=CAPN2 Calpain-2 catalytic subunit                                                                                                                                                                                                                                                                                                                            |
| 106 | IPI:IPI00382697.2 SWISS-PROT:O75369-3 ENSEMBL:ENSP00000232447 Tax_Id=9606 Gene_Symbol=FLNB Isoform 3 of Filamin-B                                                                                                                                                                                                                                                                                                                                                                                                          |

|  |     |                                                                                                                                                                                                                                                                                                                                                                                          |
|--|-----|------------------------------------------------------------------------------------------------------------------------------------------------------------------------------------------------------------------------------------------------------------------------------------------------------------------------------------------------------------------------------------------|
|  | 107 | IPI: IPI00427330.3 SWISS-PROT: Q9Y3A5 ENSEMBL: ENSP00000246868 REFSEQ: NP_057122 H-INV: HIT000084931 VEGA: OTTHUMP00000159953 Tax_Id=9606 Gene_Symbol=SBDS Ribosome maturation protein SBDS                                                                                                                                                                                              |
|  | 108 | IPI: IPI00455315.4 SWISS-PROT: P07355-1 ENSEMBL: ENSP00000379342; ENSP00000387545; ENSP00000411352 REFSEQ: NP_001002857; NP_001129487; NP_004030 H-INV: HIT000334547 VEGA: OTTHUMP00000163650 Tax_Id=9606 Gene_Symbol=ANXA2 Isoform 1 of Annexin A2                                                                                                                                      |
|  | 109 | IPI: IPI00761082.1 SWISS-PROT: Q7Z7K6-1 H-INV: HIT000053812 Tax_Id=9606 Gene_Symbol=CENPV Isoform 1 of Centromere protein V                                                                                                                                                                                                                                                              |
|  | 110 | IPI: IPI01022143.1 TREMBL: F5GWF6 ENSEMBL: ENSP00000441847 Tax_Id=9606 Gene_Symbol=CCT2 Uncharacterized protein                                                                                                                                                                                                                                                                          |
|  | 111 | IPI: IPI00003881.5 SWISS-PROT: P52597 ENSEMBL: ENSP00000338477; ENSP00000348345; ENSP00000349573; ENSP00000400433; ENSP00000438061 REFSEQ: NP_001091674; NP_001091675; NP_001091676; NP_001091677; NP_001091678; NP_004957 H-INV: HIT000003838 VEGA: OTTHUMP00000019482; OTTHUMP00000043413; OTTHUMP00000043414 Tax_Id=9606 Gene_Symbol=HNRNPF Heterogeneous nuclear ribonucleoprotein F |
|  | 112 | IPI: IPI00008274.8 SWISS-PROT: Q01518-1 TREMBL: B2RDY9; B4DI38; B4DNW7; B4DNY3; D3DPU2 ENSEMBL: ENSP00000361878; ENSP00000361883; ENSP00000361891 REFSEQ: NP_001099000; NP_006358 H-INV: HIT000192150 VEGA: OTTHUMP00000004820; OTTHUMP00000004821; OTTHUMP00000004822 Tax_Id=9606 Gene_Symbol=CAP1 Isoform 1 of Adenylyl cyclase-associated protein 1                                   |
|  | 113 | IPI: IPI00009342.1 SWISS-PROT: P46940 TREMBL: A4QPB0; B4DNP4; B4E2M0; F5H7A1; Q05DN7; Q5FWG8; Q6P1N4; Q96PA3 ENSEMBL: ENSP00000268182 REFSEQ: NP_003861 H-INV: HIT000004364 VEGA: OTTHUMP00000165227; OTTHUMP00000212176 Tax_Id=9606 Gene_Symbol=GNB4 Guanine nucleotide-binding protein subunit beta-4                                                                                  |
|  | 114 | IPI: IPI00012451.3 SWISS-PROT: Q9HAV0 TREMBL: A8K3F6; B4DLV5 ENSEMBL: ENSP00000232564; ENSP00000419693 REFSEQ: NP_067642 H-INV: HIT000004364 VEGA: OTTHUMP00000165227; OTTHUMP00000212176 Tax_Id=9606 Gene_Symbol=GNB4 Guanine nucleotide-binding protein subunit beta-4                                                                                                                 |
|  | 115 | IPI: IPI00013508.5 SWISS-PROT: P12814-1 ENSEMBL: ENSP00000193403 REFSEQ: NP_001093 H-INV: HIT000037309 Tax_Id=9606 Gene_Symbol=ACTN1 Isoform 1 of Alpha-actinin-1                                                                                                                                                                                                                        |
|  | 116 | IPI: IPI00016610.2 SWISS-PROT: Q15365 TREMBL: Q53SS8 ENSEMBL: ENSP00000305556 REFSEQ: NP_006187 H-INV: HIT000303351 VEGA: OTTHUMP00000160048 Tax_Id=9606 Gene_Symbol=PCBP1 Poly(rC)-binding protein 1                                                                                                                                                                                    |
|  | 117 | IPI: IPI00024524.4 SWISS-PROT: Q9NRX1 TREMBL: B2R823 ENSEMBL: ENSP00000263657 REFSEQ: NP_064528 H-INV: HIT000033711 VEGA: OTTHUMP00000159963 Tax_Id=9606 Gene_Symbol=PNO1 RNA-binding protein PNO1                                                                                                                                                                                       |
|  | 118 | IPI: IPI00024821.1 SWISS-PROT: O00487 TREMBL: Q4ZG77; Q53TH1; Q59G89; Q96DE8 ENSEMBL: ENSP00000386541 REFSEQ: NP_005796 H-INV: HIT000011742 VEGA: OTTHUMP00000204560 Tax_Id=9606 Gene_Symbol=PSMD14 26S proteasome non-ATPase regulatory subunit 14                                                                                                                                      |
|  | 119 | IPI: IPI00027107.5 SWISS-PROT: P49411 ENSEMBL: ENSP00000322439 REFSEQ: NP_003312 H-INV: HIT000034759 VEGA: OTTHUMP00000122539 Tax_Id=9606 Gene_Symbol=TUFM elongation factor Tu, mitochondrial precursor                                                                                                                                                                                 |
|  | 120 | IPI: IPI00106491.3 SWISS-PROT: Q9UKD2 ENSEMBL: ENSP00000364320 REFSEQ: NP_057267 H-INV: HIT000007501 VEGA: OTTHUMP00000002580 Tax_Id=9606 Gene_Symbol=MRT04 mRNA turnover protein 4 homolog                                                                                                                                                                                              |
|  | 121 | IPI: IPI00220834.8 SWISS-PROT: P13010 TREMBL: Q53T09; Q53TC2 ENSEMBL: ENSP00000375977; ENSP00000375978 REFSEQ: NP_066964 H-INV: HIT000195394 VEGA: OTTHUMP00000164061 Tax_Id=9606 Gene_Symbol=XRCC5 X-ray repair cross-complementing protein 5                                                                                                                                           |
|  | 122 | IPI: IPI00250297.3 SWISS-PROT: Q9NRN7 ENSEMBL: ENSP00000278618 REFSEQ: NP_056238 H-INV: HIT000076683 VEGA: OTTHUMP00000232354 Tax_Id=9606 Gene_Symbol=AASDHPPT L-aminoadipate-semialdehyde dehydrogenase-phosphopantetheinyl transferase                                                                                                                                                 |
|  | 123 | IPI: IPI00294159.3 SWISS-PROT: P53007 TREMBL: Q6LAP8 ENSEMBL: ENSP00000215882 REFSEQ: NP_005975 H-INV: HIT000193967 VEGA: OTTHUMP00000196366 Tax_Id=9606 Gene_Symbol=SLC25A1 Tricarboxylate transport protein, mitochondrial                                                                                                                                                             |
|  | 124 | IPI: IPI00295098.3 SWISS-PROT: Q9Y5M8 TREMBL: Q549N5 ENSEMBL: ENSP00000418401 REFSEQ: NP_067026 H-INV: HIT000082564 VEGA: OTTHUMP00000216377 Tax_Id=9606 Gene_Symbol=SRPRB Signal recognition particle receptor subunit beta                                                                                                                                                             |
|  | 125 | IPI: IPI00376503.2 TREMBL: A6NFM2 ENSEMBL: ENSP00000336579 REFSEQ: NP_722546 Tax_Id=9606 Gene_Symbol=PYCR1 pyrroline-5-carboxylate reductase 1, mitochondrial isoform 2                                                                                                                                                                                                                  |
|  | 126 | IPI: IPI00383680.3 TREMBL: A6NKT1; B4DJL0; Q5JYR6 ENSEMBL: ENSP00000362724 REFSEQ: NP_001129243 VEGA: OTTHUMP00000030902 Tax_Id=9606 Gene_Symbol=RPN2 dolichyl-diphosphooligosaccharide--protein glycosyltransferase subunit 2 isoform 2 precursor                                                                                                                                       |

|     |                                                                                                                                                                                                                                                                                                                                                          |
|-----|----------------------------------------------------------------------------------------------------------------------------------------------------------------------------------------------------------------------------------------------------------------------------------------------------------------------------------------------------------|
| 127 | IPI:IP100396321.1 SWISS-PROT:Q96AG4 TREMBL:B2RE83 ENSEMBL:ENSP00000225972 REFSEQ:NP_060979 H-INV:HIT000086125 VEGA:OTTHUMP00000221187<br>Tax_Id=9606 Gene_Symbol=LRRRC59 Leucine-rich repeat-containing protein 59                                                                                                                                       |
| 128 | IPI:IP100784842.1 TREMBL:Q6MZQ6 Tax_Id=9606 Gene_Symbol=IGHV4-31;IGHG1 Putative uncharacterized protein DKFZp686G11190                                                                                                                                                                                                                                   |
| 129 | IPI:IP100795303.2 TREMBL:B4DMJ6;E7EWF1 ENSEMBL:ENSP00000412939 Tax_Id=9606 Gene_Symbol=RPL4 cDNA FLJ50996, highly similar to 60S ribosomal protein L4                                                                                                                                                                                                    |
| 130 | IPI:IP100807545.1 SWISS-PROT:P61978-3 Tax_Id=9606 Gene_Symbol=HNRNPK Isoform 3 of Heterogeneous nuclear ribonucleoprotein K                                                                                                                                                                                                                              |
| 131 | IPI:IP100895865.1 TREMBL:B4DT43 ENSEMBL:ENSP00000399273 REFSEQ:NP_001121188 Tax_Id=9606 Gene_Symbol=ETFA electron transfer flavoprotein subunit alpha, mitochondrial isoform b                                                                                                                                                                           |
| 132 | IPI:IP100908449.1 TREMBL:B4DW90;E7EUT8 ENSEMBL:ENSP00000392027 Tax_Id=9606 Gene_Symbol=SF3A3 cDNA FLJ58737, highly similar to Splicing factor 3A subunit 3                                                                                                                                                                                               |
| 133 | IPI:IP100914855.1 SWISS-PROT:Q13505-3 H-INV:HIT000285177 Tax_Id=9606 Gene_Symbol=MTX1 Isoform 3 of Metaxin-1                                                                                                                                                                                                                                             |
| 134 | IPI:IP100966083.1 ENSEMBL:ENSP00000424270 VEGA:OTTHUMP00000223228 Tax_Id=9606 Gene_Symbol=SF3XN1 Protein                                                                                                                                                                                                                                                 |
| 135 | IPI:IP100980668.1 TREMBL:Q68DG4 ENSEMBL:ENSP00000428620 VEGA:OTTHUMP00000224933 Tax_Id=9606 Gene_Symbol=HNRNPH1 Putative uncharacterized protein DKFZp686A15170                                                                                                                                                                                          |
| 136 | IPI:IP101010794.1 SWISS-PROT:Q86V81 ENSEMBL:ENSP00000331817 Tax_Id=9606 Gene_Symbol=THOC4 THO complex subunit 4                                                                                                                                                                                                                                          |
| 137 | IPI:IP101022398.1 TREMBL:F8W0W4 ENSEMBL:ENSP00000447133 Tax_Id=9606 Gene_Symbol=NACA Uncharacterized protein                                                                                                                                                                                                                                             |
| 138 | IPI:IP100171611.7 SWISS-PROT:Q71DI3 ENSEMBL:ENSP00000333277;ENSP00000358154;ENSP00000385479 REFSEQ:NP_001005464;NP_001116847;NP_066403 VEGA:OTTHUMP00000013917;OTTHUMP00000013919;OTTHUMP00000014041 Tax_Id=9606 Gene_Symbol=HIST2H3D;HIST2H3A;HIST2H3C Histone H3.2                                                                                     |
| 139 | IPI:IP100024919.3 SWISS-PROT:P30048 TREMBL:A4UCS5;Q53HC2 ENSEMBL:ENSP00000298510 REFSEQ:NP_006784 H-INV:HIT000039251 VEGA:OTTHUMP00000020590<br>Tax_Id=9606 Gene_Symbol=PRDX3 Thioredoxin-dependent peroxide reductase, mitochondrial                                                                                                                    |
| 140 | IPI:IP100418471.6 SWISS-PROT:P08670 TREMBL:Q53HU8 ENSEMBL:ENSP00000224237;ENSP00000446007 REFSEQ:NP_003371 H-INV:HIT000262376 VEGA:OTTHUMP00000019224 Tax_Id=9606 Gene_Symbol=VIM Vimentin                                                                                                                                                               |
| 141 | IPI:IP100784001.5 H-INV:HIT000291414 Tax_Id=9606 Gene_Symbol=- Conserved hypothetical protein                                                                                                                                                                                                                                                            |
| 142 | IPI:IP100917623.1 TREMBL:B3KRM8;B7Z5D9;E9PGT1 ENSEMBL:ENSP00000387263;ENSP00000395946 VEGA:OTTHUMP00000203715 Tax_Id=9606 Gene_Symbol=TSN Uncharacterized protein                                                                                                                                                                                        |
| 143 | IPI:IP100027230.3 SWISS-PROT:P14625 TREMBL:Q59FC6;Q5CAQ5 ENSEMBL:ENSP00000299767 REFSEQ:NP_003290 H-INV:HIT000262289 Tax_Id=9606<br>Gene_Symbol=HSP90B1 Endoplasmic                                                                                                                                                                                      |
| 144 | IPI:IP100219038.9 SWISS-PROT:P84243 TREMBL:A8K4Y7;B2R4P9;B2R6Y1;Q6TXQ4 ENSEMBL:ENSP00000254810;ENSP00000355778;ENSP00000355780;ENSP00000355781 REFSEQ:NP_002098;NP_005315 H-INV:HIT000054194;HIT000271836;HIT000288836 VEGA:OTTHUMP00000035618;OTTHUMP00000035619;OTTHUMP00000035621 Tax_Id=9606<br>Gene_Symbol=H3F3A;H3F3B;H3F3AP6;H3F3AP4 Histone H3.3 |
| 145 | IPI:IP100239077.5 SWISS-PROT:P49773 ENSEMBL:ENSP00000304229 REFSEQ:NP_005331 H-INV:HIT000033040 VEGA:OTTHUMP00000159244 Tax_Id=9606<br>Gene_Symbol=HINT1 Histidine triad nucleotide-binding protein 1                                                                                                                                                    |
| 146 | IPI:IP100296337.2 SWISS-PROT:P78527-1 TREMBL:F5GX40 ENSEMBL:ENSP00000313420;ENSP00000441157 REFSEQ:NP_008835 H-INV:HIT000220021 VEGA:OTTHUMP00000237535 Tax_Id=9606 Gene_Symbol=PRKDC Isoform 1 of DNA-dependent protein kinase catalytic subunit                                                                                                        |
| 147 | IPI:IP100604620.3 SWISS-PROT:P19338 TREMBL:B3KM80;B3KTP9 ENSEMBL:ENSP00000318195 REFSEQ:NP_005372 VEGA:OTTHUMP00000204507 Tax_Id=9606<br>Gene_Symbol=NCL Nucleolin                                                                                                                                                                                       |
| 148 | IPI:IP100644667.1 TREMBL:Q5SQT8 ENSEMBL:ENSP00000362333 VEGA:OTTHUMP00000019746 Tax_Id=9606 Gene_Symbol=SAR1A Uncharacterized protein                                                                                                                                                                                                                    |
| 149 | IPI:IP100910781.1 TREMBL:B4DE36;B4DG39 ENSEMBL:ENSP00000405573 REFSEQ:NP_001171651 Tax_Id=9606 Gene_Symbol=GPI glucose-6-phosphate isomerase isoform 1                                                                                                                                                                                                   |
| 150 | IPI:IP101012384.1 ENSEMBL:ENSP00000419764 VEGA:OTTHUMP00000214877 Tax_Id=9606 Gene_Symbol=IPO5 Protein                                                                                                                                                                                                                                                   |



|     |                                                                                                                                                                                                                                                                                                                                                                |
|-----|----------------------------------------------------------------------------------------------------------------------------------------------------------------------------------------------------------------------------------------------------------------------------------------------------------------------------------------------------------------|
| 151 | IPI: IPI00001159.1   SWISS-PROT: Q92616   TREMBL: B4DM32; E1NZA1   ENSEMBL: ENSP00000300648   REFSEQ: NP_006827   H-INV: HIT000042355 Tax_Id=9606<br>Gene_Symbol=GCN1L1 Translational activator GCN1                                                                                                                                                           |
| 152 | IPI: IPI00003833.3   SWISS-PROT: Q9Y6C9   TREMBL: Q53G34   ENSEMBL: ENSP00000303222   REFSEQ: NP_055157   H-INV: HIT000253434   VEGA: OTTHUMP00000234441<br>Tax_Id=9606 Gene_Symbol=MTCH2 Mitochondrial carrier homolog 2                                                                                                                                      |
| 153 | IPI: IPI00005158.1   SWISS-PROT: P36776   TREMBL: E5KMH8; E5KMI6   ENSEMBL: ENSP00000353826   REFSEQ: NP_004784   H-INV: HIT000029449 Tax_Id=9606<br>Gene_Symbol=LONP1 Lon protease homolog, mitochondrial                                                                                                                                                     |
| 154 | IPI: IPI00010796.1   SWISS-PROT: P07237   TREMBL: B4DJS0   ENSEMBL: ENSP00000327801   REFSEQ: NP_000909   H-INV: HIT000040847   VEGA: OTTHUMP00000196834<br>Tax_Id=9606 Gene_Symbol=P4HB Protein disulfide-isomerase                                                                                                                                           |
| 155 | IPI: IPI00010951.2   SWISS-PROT: P58107   TREMBL: E9PPU0; Q9NSU9   ENSEMBL: ENSP00000436337   REFSEQ: NP_112598   H-INV: HIT000026013   VEGA: OTTHUMP00000228909<br>Tax_Id=9606 Gene_Symbol=EPPK1 Epiplakin                                                                                                                                                    |
| 156 | IPI: IPI00012251.5   SWISS-PROT: Q53S58   TREMBL: B3KUD0   ENSEMBL: ENSP00000272521; ENSP00000385966; ENSP00000402661   REFSEQ: NP_001098668; NP_001098669; NP_085054   H-INV: HIT000049359   VEGA: OTTHUMP00000203668; OTTHUMP00000203669 Tax_Id=9606 Gene_Symbol=TMEM177 Transmembrane protein 177                                                           |
| 157 | IPI: IPI00012382.3   SWISS-PROT: P09012   TREMBL: B2R802   ENSEMBL: ENSP00000243563   REFSEQ: NP_004587   H-INV: HIT000029593 Tax_Id=9606 Gene_Symbol=SNRPA U1<br>small nuclear ribonucleoprotein A                                                                                                                                                            |
| 158 | IPI: IPI00012837.1   SWISS-PROT: P33176   TREMBL: A8K048; D3DRX6; Q2TA90; Q66K46; Q6P164   ENSEMBL: ENSP00000307078   REFSEQ: NP_004512   H-INV: HIT000322766   VEGA: OTTHUMP00000019411 Tax_Id=9606 Gene_Symbol=KIF5B Kinesin-1 heavy chain                                                                                                                   |
| 159 | IPI: IPI00014198.3   SWISS-PROT: Q15024   TREMBL: B2RDZ9; B4DIU0   ENSEMBL: ENSP00000265564   REFSEQ: NP_055819   H-INV: HIT000035984   VEGA: OTTHUMP00000164126<br>Tax_Id=9606 Gene_Symbol=EXOSC7 Exosome complex component RRP42                                                                                                                             |
| 160 | IPI: IPI00015011.1   SWISS-PROT: Q9NXX8-1   ENSEMBL: ENSP00000247977   REFSEQ: NP_060173   H-INV: HIT000010278 Tax_Id=9606 Gene_Symbol=FBXL12 Isoform 1 of F-<br>box/LRR-repeat protein 12                                                                                                                                                                     |
| 161 | IPI: IPI00015953.3   SWISS-PROT: Q9NR30-1   TREMBL: Q8NI92   ENSEMBL: ENSP00000346120   REFSEQ: NP_004719   H-INV: HIT000219764   VEGA: OTTHUMP00000019713<br>Tax_Id=9606 Gene_Symbol=DDX21 Isoform 1 of Nucleolar RNA helicase 2                                                                                                                              |
| 162 | IPI: IPI00016676.1   SWISS-PROT: Q15388   ENSEMBL: ENSP00000355666   REFSEQ: NP_055580   H-INV: HIT000042150   VEGA: OTTHUMP00000037593 Tax_Id=9606<br>Gene_Symbol=TOMM20 Mitochondrial import receptor subunit TOM20 homolog                                                                                                                                  |
| 163 | IPI: IPI00016910.1   SWISS-PROT: Q99613   TREMBL: A1KYQ7; B4E1D5; B4E2Z6; F5H1I1; Q3B7B9   ENSEMBL: ENSP00000332604; ENSP00000378953   REFSEQ: NP_001032897; NP_001186071; NP_003743   H-INV: HIT000030496   VEGA: OTTHUMP00000125295 Tax_Id=9606 Gene_Symbol=EIF3C; EIF3CL Eukaryotic translation initiation factor 3 subunit C                               |
| 164 | IPI: IPI00017596.3   SWISS-PROT: Q15691   TREMBL: A2VCR0   ENSEMBL: ENSP00000364721   REFSEQ: NP_036457   H-INV: HIT000338429   VEGA: OTTHUMP00000030608<br>Tax_Id=9606 Gene_Symbol=MAPRE1 Microtubule-associated protein RP/EB family member 1                                                                                                                |
| 165 | IPI: IPI00018206.4   SWISS-PROT: P00505   TREMBL: A8K482; B3KUZ8   ENSEMBL: ENSP00000245206   REFSEQ: NP_002071   H-INV: HIT000194855   VEGA: OTTHUMP00000165254<br>Tax_Id=9606 Gene_Symbol=GOT2 Aspartate aminotransferase, mitochondrial                                                                                                                     |
| 166 | IPI: IPI00018278.3   SWISS-PROT: Q71UI9   ENSEMBL: ENSP00000308405   REFSEQ: NP_036544   VEGA: OTTHUMP00000159513 Tax_Id=9606 Gene_Symbol=H2AFV Histone H2A.V                                                                                                                                                                                                  |
| 167 | IPI: IPI00025340.3   SWISS-PROT: Q96GD0   ENSEMBL: ENSP00000215904   REFSEQ: NP_064711   H-INV: HIT000296848   VEGA: OTTHUMP00000042130 Tax_Id=9606<br>Gene_Symbol=PDXP Pyridoxal phosphate phosphatase                                                                                                                                                        |
| 168 | IPI: IPI00026546.1   SWISS-PROT: P68402   TREMBL: Q6IBR6   ENSEMBL: ENSP00000435289   REFSEQ: NP_002563   H-INV: HIT000282479   VEGA: OTTHUMP00000234977<br>Tax_Id=9606 Gene_Symbol=PFAFH1B2 Platelet-activating factor acetylhydrolase IB subunit beta                                                                                                        |
| 169 | IPI: IPI00027223.2   SWISS-PROT: O75874   TREMBL: B2R5M8; B4DXS4; Q0QER2; Q567U4; Q6FHQ6; Q6FI37; Q6FIA4   ENSEMBL: ENSP00000260985; ENSP00000390265; ENSP00000410513   REFSEQ: NP_005887   H-INV: HIT000287928   VEGA: OTTHUMP00000163870; OTTHUMP00000206464; OTTHUMP00000206466 Tax_Id=9606 Gene_Symbol=IDH1 Isocitrate dehydrogenase [NADP]<br>cytoplasmic |

|  |     |                                                                                                                                                                                                                                                                                 |
|--|-----|---------------------------------------------------------------------------------------------------------------------------------------------------------------------------------------------------------------------------------------------------------------------------------|
|  | 170 | IPI:IPI00029046.1 SWISS-PROT:Q14165 ENSEMBL:ENSP00000228506 REFSEQ:NP_055545 H-INV:HIT000042289 VEGA:OTTHUMP00000240357 Tax_Id=9606 Gene_Symbol=MLEC Malectin                                                                                                                   |
|  | 171 | IPI:IPI00031091.3 SWISS-PROT:Q9BUP0 TREMBL:Q59EU6;Q7Z2R5 ENSEMBL:ENSP00000264059 REFSEQ:NP_079478 H-INV:HIT000278746 VEGA:OTTHUMP00000164362 Tax_Id=9606 Gene_Symbol=EFHD1 EF-hand domain-containing protein D1                                                                 |
|  | 172 | IPI:IPI00154509.3 SWISS-PROT:Q8TAA3-1 ENSEMBL:ENSP00000311121 REFSEQ:NP_653263 H-INV:HIT000098540 Tax_Id=9606 Gene_Symbol=PSMA8 Isoform 1 of Proteasome subunit alpha type-7-like                                                                                               |
|  | 173 | IPI:IPI00163187.10 SWISS-PROT:Q16658 TREMBL:B3KTA3;Q96IH1 ENSEMBL:ENSP00000371798 REFSEQ:NP_003079 H-INV:HIT000217481 VEGA:OTTHUMP00000115718 Tax_Id=9606 Gene_Symbol=FSCN1 Fascin                                                                                              |
|  | 174 | IPI:IPI00165230.1 SWISS-PROT:Q96EP5-1 TREMBL:B3KS63 ENSEMBL:ENSP00000233078 REFSEQ:NP_061832 H-INV:HIT000035629 Tax_Id=9606 Gene_Symbol=DAZAP1 Isoform 1 of DAZ-associated protein 1                                                                                            |
|  | 175 | IPI:IPI00178440.3 SWISS-PROT:P24534 TREMBL:A4D1M6 ENSEMBL:ENSP00000236957;ENSP00000376055;ENSP00000376056 REFSEQ:NP_001032752;NP_001950;NP_066944 H-INV:HIT000322412 VEGA:OTTHUMP00000163805;OTTHUMP00000206335 Tax_Id=9606 Gene_Symbol=SNORA41;EEF1B2 Elongation factor 1-beta |
|  | 176 | IPI:IPI00216773.6 TREMBL:Q8IUk7 ENSEMBL:ENSP00000331666 Tax_Id=9606 Gene_Symbol=ALB Uncharacterized protein                                                                                                                                                                     |
|  | 177 | IPI:IPI00217227.3 SWISS-PROT:Q9NR50-2 ENSEMBL:ENSP00000361257 REFSEQ:NP_001160060 VEGA:OTTHUMP00000010263 Tax_Id=9606 Gene_Symbol=EIF2B3 Isoform 2 of Translation initiation factor eIF-2B subunit gamma                                                                        |
|  | 178 | IPI:IPI00219219.3 SWISS-PROT:P09382 TREMBL:Q15954 ENSEMBL:ENSP00000215909 REFSEQ:NP_002296 H-INV:HIT000267445 VEGA:OTTHUMP00000198176 Tax_Id=9606 Gene_Symbol=LGALS1 Galectin-1                                                                                                 |
|  | 179 | IPI:IPI00220656.5 SWISS-PROT:Q92526 ENSEMBL:ENSP00000327191 REFSEQ:NP_006575 H-INV:HIT000040276 Tax_Id=9606 Gene_Symbol=CCT6B T-complex protein 1 subunit zeta-2                                                                                                                |
|  | 180 | IPI:IPI00221091.9 SWISS-PROT:P62244 TREMBL:A8K7H3;B2R4W8 ENSEMBL:ENSP00000318646 REFSEQ:NP_001010;NP_001025180 H-INV:HIT000338243 VEGA:OTTHUMP00000162054 Tax_Id=9606 Gene_Symbol=RPS15A 40S ribosomal protein S15a                                                             |
|  | 181 | IPI:IPI00299155.5 SWISS-PROT:P25789 TREMBL:B2RDG0;Q7Z474 ENSEMBL:ENSP00000044462 REFSEQ:NP_001096137;NP_002780 H-INV:HIT000032410 VEGA:OTTHUMP00000185020 Tax_Id=9606 Gene_Symbol=PSMA4 Proteasome subunit alpha type-4                                                         |
|  | 182 | IPI:IPI00304082.8 SWISS-PROT:Q96CN7 ENSEMBL:ENSP00000173527 REFSEQ:NP_057132 H-INV:HIT000036522 VEGA:OTTHUMP00000223219 Tax_Id=9606 Gene_Symbol=ISOC1 Isochorismatase domain-containing protein 1                                                                               |
|  | 183 | IPI:IPI00304435.3 SWISS-PROT:Q9BPW8 TREMBL:A8K4I8 ENSEMBL:ENSP00000216121 REFSEQ:NP_003625 H-INV:HIT000243848 VEGA:OTTHUMP00000199702 Tax_Id=9606 Gene_Symbol=NIPSNAP1 Protein NipSnap homolog 1                                                                                |
|  | 184 | IPI:IPI00306382.2 SWISS-PROT:O14828-1 TREMBL:Q6FHJ5 ENSEMBL:ENSP00000307275 REFSEQ:NP_005689 H-INV:HIT000294546 VEGA:OTTHUMP00000034066 Tax_Id=9606 Gene_Symbol=SCAMP3 Isoform 1 of Secretory carrier-associated membrane protein 3                                             |
|  | 185 | IPI:IPI00329598.3 SWISS-PROT:Q8NBQ5 ENSEMBL:ENSP00000351035 REFSEQ:NP_057329 H-INV:HIT000051577 VEGA:OTTHUMP00000161168 Tax_Id=9606 Gene_Symbol=HSD17B11 Estradiol 17-beta-dehydrogenase 11                                                                                     |
|  | 186 | IPI:IPI00335069.2 TREMBL:A6NP15 ENSEMBL:ENSP00000349667 REFSEQ:NP_777360 VEGA:OTTHUMP00000179136 Tax_Id=9606 Gene_Symbol=PSMD12 26S proteasome non-ATPase regulatory subunit 12 isoform 2                                                                                       |
|  | 187 | IPI:IPI00336094.5 SWISS-PROT:Q99714-2 ENSEMBL:ENSP00000364453 REFSEQ:NP_001032900 VEGA:OTTHUMP00000023349 Tax_Id=9606 Gene_Symbol=HSD17B10 Isoform 2 of 3-hydroxyacyl-CoA dehydrogenase type-2                                                                                  |
|  | 188 | IPI:IPI00374657.2 SWISS-PROT:Q9POL0-2 ENSEMBL:ENSP00000345656 REFSEQ:NP_003565 VEGA:OTTHUMP00000162362 Tax_Id=9606 Gene_Symbol=VAPA Isoform 2 of Vesicle-associated membrane protein-associated protein A                                                                       |
|  | 189 | IPI:IPI00375145.1 SWISS-PROT:P45974-2 ENSEMBL:ENSP00000373883 REFSEQ:NP_003472 VEGA:OTTHUMP00000240482 Tax_Id=9606 Gene_Symbol=USP5 Isoform Short of Ubiquitin carboxyl-terminal hydrolase 5                                                                                    |
|  | 190 | IPI:IPI00384973.1 SWISS-PROT:P18206-3 Tax_Id=9606 Gene_Symbol=VCL Isoform 3 of Vinculin                                                                                                                                                                                         |

|     |                                                                                                                                                                                                                                                                                                              |
|-----|--------------------------------------------------------------------------------------------------------------------------------------------------------------------------------------------------------------------------------------------------------------------------------------------------------------|
| 191 | IPI:UPI00385631.7 SWISS-PROT:O43149-1 ENSEMBL:ENSP00000371051 REFSEQ:NP_055928 H-INV:HIT000000116 VEGA:OTTHUMP00000115929 Tax_Id=9606 Gene_Symbol=ZZEF1 Isoform 1 of Zinc finger ZZ-type and EF-hand domain-containing protein 1                                                                             |
| 192 | IPI:UPI00398625.5 SWISS-PROT:Q86YZ3 TREMBL:Q5DT20;Q5W8V9 ENSEMBL:ENSP00000357791 REFSEQ:NP_001009931 H-INV:HIT000331814 VEGA:OTTHUMP00000014118 Tax_Id=9606 Gene_Symbol=HRNR Hornerin                                                                                                                        |
| 193 | IPI:UPI00410241.2 TREMBL:B1ALD8;B4E3A7;C0IMJ3;D2KRH7 ENSEMBL:ENSP00000369067 VEGA:OTTHUMP00000018270 Tax_Id=9606 Gene_Symbol=POSTN Uncharacterized protein                                                                                                                                                   |
| 194 | IPI:UPI00410714.5 SWISS-PROT:P69905 TREMBL:D1MGQ2;E1B2D1;E9LUX2;E9M4D4;Q4ZGM8;Q7Z6G4;Q7Z7B4;Q86YQ5;Q96T46;Q9BX83 ENSEMBL:ENSP00000251595;ENSP00000322421 REFSEQ:NP_000508;NP_000549 H-INV:HIT000273650 VEGA:OTTHUMP00000066291;OTTHUMP00000066501 Tax_Id=9606 Gene_Symbol=HBA2;HBA1 Hemoglobin subunit alpha |
| 195 | IPI:UPI00450235.1 TREMBL:E7ETA0;Q7KZ24 ENSEMBL:ENSP00000361621 Tax_Id=9606 Gene_Symbol=YBX1 Nuclease sensitive element binding protein-1                                                                                                                                                                     |
| 196 | IPI:UPI00465225.1 TREMBL:A6NIT8 ENSEMBL:ENSP00000373401;ENSP00000373402 REFSEQ:NP_001005335 Tax_Id=9606 Gene_Symbol=HNRNPL heterogeneous nuclear ribonucleoprotein L isoform b                                                                                                                               |
| 197 | IPI:UPI00470573.1 TREMBL:B4DHK9;E9PF41 ENSEMBL:ENSP00000367220 REFSEQ:NP_001005386 H-INV:HIT000057727 VEGA:OTTHUMP00000202270 Tax_Id=9606 Gene_Symbol=ACTR2 actin-related protein 2 isoform a                                                                                                                |
| 198 | IPI:UPI00470674.5 SWISS-PROT:Q9UHQ9 ENSEMBL:ENSP00000356218 REFSEQ:NP_057327 H-INV:HIT000253070 VEGA:OTTHUMP00000038802 Tax_Id=9606 Gene_Symbol=CYB5R1 NADH-cytochrome b5 reductase 1                                                                                                                        |
| 199 | IPI:UPI00642240.1 SWISS-PROT:Q9BU76-4 Tax_Id=9606 Gene_Symbol=C1orf35 Isoform 4 of Multiple myeloma tumor-associated protein 2                                                                                                                                                                               |
| 200 | IPI:UPI00643249.1 SWISS-PROT:Q9NWS8-2 ENSEMBL:ENSP00000336683 VEGA:OTTHUMP00000017431 Tax_Id=9606 Gene_Symbol=RMND1 Isoform 2 of Required for meiotic nuclear division protein 1 homolog                                                                                                                     |
| 201 | IPI:UPI00644037.1 TREMBL:B3KM97;B3KSQ1 ENSEMBL:ENSP00000397206 Tax_Id=9606 Gene_Symbol=TECR cDNA FLJ36768 fis, clone ADIPS1000064, highly similar to Synaptic glycoprotein SC2                                                                                                                               |
| 202 | IPI:UPI00644079.4 TREMBL:B3KX72;Q5RI18;Q5RI19;Q7Z4Q5 ENSEMBL:ENSP00000410728;ENSP00000416455 VEGA:OTTHUMP00000038194 Tax_Id=9606 Gene_Symbol=HNRNPU cDNA FLJ44920 fis, clone BRAMY3011501, highly similar to Heterogeneous nuclear ribonucleoprotein U                                                       |
| 203 | IPI:UPI00644576.1 TREMBL:Q5HY54;Q96C61 ENSEMBL:ENSP00000358863 VEGA:OTTHUMP00000064890 Tax_Id=9606 Gene_Symbol=FLNA Uncharacterized protein                                                                                                                                                                  |
| 204 | IPI:UPI00644674.1 SWISS-PROT:Q9Y5Y2 TREMBL:B2RDN3;Q2YS46 ENSEMBL:ENSP00000262302 REFSEQ:NP_036357 H-INV:HIT000033584 VEGA:OTTHUMP00000158805 Tax_Id=9606 Gene_Symbol=NUBP2 Cytosolic Fe-S cluster assembly factor NUBP2                                                                                      |
| 205 | IPI:UPI00646055.3 TREMBL:F5H897;Q5CAQ4 ENSEMBL:ENSP00000442070 Tax_Id=9606 Gene_Symbol=TRAP1 Uncharacterized protein                                                                                                                                                                                         |
| 206 | IPI:UPI00647556.2 TREMBL:B7Z373;B7Z5V1;Q5T0I1;Q69YR8 ENSEMBL:ENSP00000377882;ENSP00000410657;ENSP00000411293 REFSEQ:NP_001121138;NP_001121139 VEGA:OTTHUMP00000022013 Tax_Id=9606 Gene_Symbol=GSN gelsolin isoform c                                                                                         |
| 207 | IPI:UPI00647650.3 TREMBL:B3KS98;Q53HG0;Q53HR0 ENSEMBL:ENSP00000276682 H-INV:HIT000017995 VEGA:OTTHUMP00000227893 Tax_Id=9606 Gene_Symbol=EIF3H cDNA FLJ35809 fis, clone TESTI2006016, highly similar to Eukaryotic translation initiation factor 3 subunit 3                                                 |
| 208 | IPI:UPI00647786.1 SWISS-PROT:Q92888-1 ENSEMBL:ENSP00000346532 REFSEQ:NP_004697 Tax_Id=9606 Gene_Symbol=ARHGEF1 Isoform 1 of Rho guanine nucleotide exchange factor 1                                                                                                                                         |
| 209 | IPI:UPI00794461.1 SWISS-PROT:Q99877 ENSEMBL:ENSP00000380177;ENSP00000446031 REFSEQ:NP_003511 H-INV:HIT000035226 VEGA:OTTHUMP00000018018 Tax_Id=9606 Gene_Symbol=HIST1H2BN Histone H2B type 1-N                                                                                                               |
| 210 | IPI:UPI00797206.1 ENSEMBL:ENSP00000416832 VEGA:OTTHUMP00000096464 Tax_Id=9606 Gene_Symbol=CCT8 Protein                                                                                                                                                                                                       |
| 211 | IPI:UPI00827700.1 TREMBL:A1XKG3 ENSEMBL:ENSP00000297518 REFSEQ:NP_001157882 VEGA:OTTHUMP00000212939 Tax_Id=9606 Gene_Symbol=CDK5 cyclin-dependent kinase 5 isoform 2                                                                                                                                         |
| 212 | IPI:UPI00829827.1 ENSEMBL:ENSP00000417136 VEGA:OTTHUMP00000200285 Tax_Id=9606 Gene_Symbol=- 13 kDa protein                                                                                                                                                                                                   |
| 213 | IPI:UPI00843975.1 SWISS-PROT:P15311 TREMBL:B2R6J2;Q6NUR7 ENSEMBL:ENSP00000338934;ENSP00000356042 REFSEQ:NP_001104547;NP_003370 H-INV:HIT000026256 VEGA:OTTHUMP00000017506;OTTHUMP00000017507 Tax_Id=9606 Gene_Symbol=EZR Ezrin                                                                               |

|  |     |                                                                                                                                                                                                                                                    |
|--|-----|----------------------------------------------------------------------------------------------------------------------------------------------------------------------------------------------------------------------------------------------------|
|  | 214 | IPI:IP100844578.1 SWISS-PROT:Q08211 TREMBL:B3KU66;Q12803;Q32Q22;Q6PIK6 ENSEMBL:ENSP00000356520 REFSEQ:NP_001348 H-INV:HIT000385232 VEGA:OTTHUMP0000033287 Tax_Id=9606 Gene_Symbol=DHX9 ATP-dependent RNA helicase A                                |
|  | 215 | IPI:IP100847663.2 TREMBL:B4DJ98 H-INV:HIT000298995 Tax_Id=9606 Gene_Symbol=PDIA3 cDNA FLJ53558, highly similar to Protein disulfide-isomerase A3                                                                                                   |
|  | 216 | IPI:IP100872762.2 SWISS-PROT:P53597 TREMBL:A8K4W7;B2R8A1;Q6IAL5 ENSEMBL:ENSP00000377446 REFSEQ:NP_003840 H-INV:HIT000301348 VEGA:OTTHUMP00000160494 Tax_Id=9606 Gene_Symbol=SUCLG1 Succinyl-CoA ligase [GDP-forming] subunit alpha, mitochondrial  |
|  | 217 | IPI:IP100893242.1 TREMBL:A8MU58 ENSEMBL:ENSP00000383327 VEGA:OTTHUMP00000201310 Tax_Id=9606 Gene_Symbol=AIMP2 Uncharacterized protein                                                                                                              |
|  | 218 | IPI:IP100893733.1 ENSEMBL:ENSP00000414806 VEGA:OTTHUMP00000201756 Tax_Id=9606 Gene_Symbol=AGR2 13 kDa protein                                                                                                                                      |
|  | 219 | IPI:IP100894235.1 SWISS-PROT:Q6ZNI1-1 ENSEMBL:ENSP00000415034 REFSEQ:NP_055990 H-INV:HIT000050375 VEGA:OTTHUMP00000209976 Tax_Id=9606 Gene_Symbol=NBEAL2 Isoform 1 of Neurobeachin-like protein 2                                                  |
|  | 220 | IPI:IP100910019.3 TREMBL:B4DP93;E9PHL5 Tax_Id=9606 Gene_Symbol=MVP Uncharacterized protein                                                                                                                                                         |
|  | 221 | IPI:IP100910248.1 TREMBL:B4DDW0 ENSEMBL:ENSP00000416395 Tax_Id=9606 Gene_Symbol=RDH11 cDNA FLJ53708, highly similar to Retinol dehydrogenase 11                                                                                                    |
|  | 222 | IPI:IP100910553.1 TREMBL:B4DUK1 Tax_Id=9606 Gene_Symbol=PRDX6 cDNA FLJ51310, moderately similar to Peroxiredoxin-6                                                                                                                                 |
|  | 223 | IPI:IP100915383.1 SWISS-PROT:Q13555-8 TREMBL:Q13280 ENSEMBL:ENSP00000319060;ENSP00000405561 REFSEQ:NP_751911 VEGA:OTTHUMP00000019848 Tax_Id=9606 Gene_Symbol=CAMK2G Isoform 8 of Calcium/calmodulin-dependent protein kinase type II subunit gamma |
|  | 224 | IPI:IP100924833.1 TREMBL:F8WE39 ENSEMBL:ENSP00000402163 VEGA:OTTHUMP00000207519 Tax_Id=9606 Gene_Symbol=ARPC4;ARPC4-TTL3 Uncharacterized protein                                                                                                   |
|  | 225 | IPI:IP100926648.1 TREMBL:C9JIF9 ENSEMBL:ENSP00000415862 VEGA:OTTHUMP00000210908 Tax_Id=9606 Gene_Symbol=APEH Uncharacterized protein                                                                                                               |
|  | 226 | IPI:IP100927536.1 ENSEMBL:ENSP00000391399 VEGA:OTTHUMP00000206778 Tax_Id=9606 Gene_Symbol=ATIC 12 kDa protein                                                                                                                                      |
|  | 227 | IPI:IP100939558.2 TREMBL:B3KRG5;Q8N8Y7 ENSEMBL:ENSP00000415250 Tax_Id=9606 Gene_Symbol=RBMX cDNA FLJ38696 fis, clone KIDNE2001931, highly similar to HETEROGENEOUS NUCLEAR RIBONUCLEOPROTEIN G                                                     |
|  | 228 | IPI:IP100943329.2 ENSEMBL:ENSP00000370973 Tax_Id=9606 Gene_Symbol=TNNT3 31 kDa protein                                                                                                                                                             |
|  | 229 | IPI:IP100945216.1 TREMBL:F8WB Y4 ENSEMBL:ENSP00000418280 VEGA:OTTHUMP00000214032 Tax_Id=9606 Gene_Symbol=ATP1B3 Uncharacterized protein                                                                                                            |
|  | 230 | IPI:IP100964070.1 TREMBL:D6RA82 ENSEMBL:ENSP00000421015;ENSP00000423068 VEGA:OTTHUMP00000219237;OTTHUMP00000219238 Tax_Id=9606 Gene_Symbol=ANXA3 Uncharacterized protein                                                                           |
|  | 231 | IPI:IP100964598.1 ENSEMBL:ENSP00000422917 VEGA:OTTHUMP00000217152 Tax_Id=9606 Gene_Symbol=COPB2 20 kDa protein                                                                                                                                     |
|  | 232 | IPI:IP100965185.1 TREMBL:D6R937 ENSEMBL:ENSP00000423681 VEGA:OTTHUMP00000219673 Tax_Id=9606 Gene_Symbol=AIMP1 Uncharacterized protein                                                                                                              |
|  | 233 | IPI:IP100965269.1 TREMBL:B4DE30;B7ZAR1 ENSEMBL:ENSP00000427297 VEGA:OTTHUMP00000220953 Tax_Id=9606 Gene_Symbol=CCT5 cDNA, FLJ79275, highly similar to T-complex protein 1 subunit epsilon                                                          |
|  | 234 | IPI:IP100966986.1 TREMBL:D6RD47 ENSEMBL:ENSP00000425865;ENSP00000427043 VEGA:OTTHUMP00000222334;OTTHUMP00000222652 Tax_Id=9606 Gene_Symbol=RPS23 Uncharacterized protein                                                                           |
|  | 235 | IPI:IP100974560.1 TREMBL:E5RIZ6 ENSEMBL:ENSP00000429250 VEGA:OTTHUMP00000224186 Tax_Id=9606 Gene_Symbol=G3BP1 Uncharacterized protein                                                                                                              |
|  | 236 | IPI:IP100976589.1 TREMBL:E9PL71 ENSEMBL:ENSP00000431460 VEGA:OTTHUMP00000231356 Tax_Id=9606 Gene_Symbol=EEF1D Uncharacterized protein                                                                                                              |
|  | 237 | IPI:IP100981963.1 TREMBL:E9PRR7 ENSEMBL:ENSP00000435943 VEGA:OTTHUMP00000232435 Tax_Id=9606 Gene_Symbol=FRG1 Uncharacterized protein                                                                                                               |
|  | 238 | IPI:IP100983309.1 TREMBL:E9PNQ1 ENSEMBL:ENSP00000432820 VEGA:OTTHUMP00000231295 Tax_Id=9606 Gene_Symbol=STT3A Uncharacterized protein                                                                                                              |
|  | 239 | IPI:IP100983707.1 TREMBL:E9PS95 ENSEMBL:ENSP00000435862 VEGA:OTTHUMP00000229958 Tax_Id=9606 Gene_Symbol=SLC25A22 Uncharacterized protein                                                                                                           |
|  | 240 | IPI:IP100984839.1 REFSEQ:NP_001180345 Tax_Id=9606 Gene_Symbol=DDX3X ATP-dependent RNA helicase DDX3X isoform 2                                                                                                                                     |
|  | 241 | IPI:IP101009526.1 TREMBL:B4E1E9 ENSEMBL:ENSP00000446242 Tax_Id=9606 Gene_Symbol=SLC25A10 cDNA FLJ61034, highly similar to Mitochondrial dicarboxylate carrier                                                                                      |
|  | 242 | IPI:IP101010908.1 TREMBL:B3KQ25 ENSEMBL:ENSP00000441682 Tax_Id=9606 Gene_Symbol=PSME3 cDNA FLJ32659 fis, clone TEST11000045, highly similar to Proteasome activator complex subunit 3                                                              |

|       |     |                                                                                                                                                                                                                                                                                                                                                             |
|-------|-----|-------------------------------------------------------------------------------------------------------------------------------------------------------------------------------------------------------------------------------------------------------------------------------------------------------------------------------------------------------------|
|       | 243 | IPI: IPI01011042.1 SWISS-PROT: Q8NE86-3 TREMBL: B4DWD0 ENSEMBL: ENSP00000440913 Tax_Id=9606 Gene_Symbol=MCU Isoform 3 of Calcium uniporter protein, mitochondrial                                                                                                                                                                                           |
|       | 244 | IPI: IPI01012564.1 TREMBL: A1L180;B7Z9C0;F5H730 ENSEMBL: ENSP00000442838 Tax_Id=9606 Gene_Symbol=MYO1C cDNA FLJ52405, highly similar to Myosin Ic                                                                                                                                                                                                           |
|       | 245 | IPI: IPI01015219.1 TREMBL: B7Z5E2 ENSEMBL: ENSP00000445546 Tax_Id=9606 Gene_Symbol=PSMC2 cDNA FLJ52353, highly similar to 26S protease regulatory subunit 7                                                                                                                                                                                                 |
|       | 246 | IPI: IPI01015917.1 TREMBL: B7Z2F4 ENSEMBL: ENSP00000443451 Tax_Id=9606 Gene_Symbol=CCT4 T-complex protein 1 subunit delta                                                                                                                                                                                                                                   |
|       | 247 | IPI: IPI01015928.1 TREMBL: F5H4X1 ENSEMBL: ENSP00000444850 Tax_Id=9606 Gene_Symbol=USO1 Uncharacterized protein                                                                                                                                                                                                                                             |
|       | 248 | IPI: IPI01021816.1 TREMBL: F8VS27 ENSEMBL: ENSP00000448575 Tax_Id=9606 Gene_Symbol=TSFM Uncharacterized protein                                                                                                                                                                                                                                             |
|       | 249 | IPI: IPI01025425.1 ENSEMBL: ENSP00000451171 Tax_Id=9606 Gene_Symbol=PSMA6 Protein                                                                                                                                                                                                                                                                           |
|       | 250 | IPI: IPI01025580.1 TREMBL: A0N4V7 ENSEMBL: ENSP00000451870 Tax_Id=9606 Gene_Symbol=- Possible J 56 gene segment (Fragment)                                                                                                                                                                                                                                  |
| Band4 | 1   | IPI: IPI00032905.3 SWISS-PROT: Q9H267 TREMBL: B7Z1N4;B7Z6M7 ENSEMBL: ENSP00000327650 REFSEQ: NP_061138 H-INV: HIT000076960 VEGA: OTTHUMP00000194751 Tax_Id=9606 Gene_Symbol=VPS33B Vacuolar protein sorting-associated protein 33B                                                                                                                          |
|       | 2   | IPI: IPI00979518.1 TREMBL: E9PP50 ENSEMBL: ENSP00000436431 VEGA: OTTHUMP00000233683 Tax_Id=9606 Gene_Symbol=CFL1 Uncharacterized protein                                                                                                                                                                                                                    |
|       | 3   | IPI: IPI00930226.1 TREMBL: B4E3A4 Tax_Id=9606 Gene_Symbol=ACTG1 cDNA FLJ57283, highly similar to Actin, cytoplasmic 2                                                                                                                                                                                                                                       |
|       | 4   | IPI: IPI00221088.5 SWISS-PROT: P46781 TREMBL: A9C4C1;B7Z732 ENSEMBL: ENSP00000302896;ENSP00000375632;ENSP00000375633 REFSEQ: NP_001004 H-INV: HIT000296024 VEGA: OTTHUMP00000069577;OTTHUMP00000069584;OTTHUMP00000069585;OTTHUMP00000194792;OTTHUMP00000194794;OTTHUMP00000198893;OTTHUMP00000198894 Tax_Id=9606 Gene_Symbol=RPS9 40S ribosomal protein S9 |
|       | 5   | IPI: IPI00027270.1 SWISS-PROT: P61254 TREMBL: Q6IBH6 ENSEMBL: ENSP00000293842 REFSEQ: NP_000978 H-INV: HIT000264489 VEGA: OTTHUMP00000135333 Tax_Id=9606 Gene_Symbol=RPL26 60S ribosomal protein L26                                                                                                                                                        |
|       | 6   | IPI: IPI00930688.1 SWISS-PROT: P68363 TREMBL: A8JZY9;B3KPS3;B3KT06 ENSEMBL: ENSP00000336799 REFSEQ: NP_006073 H-INV: HIT000291174 Tax_Id=9606 Gene_Symbol=TUBA1B Tubulin alpha-1B chain                                                                                                                                                                     |
|       | 7   | IPI: IPI00219018.7 SWISS-PROT: P04406 TREMBL: Q0QET7;Q2TSD0 ENSEMBL: ENSP00000229239;ENSP00000380068;ENSP00000380070 REFSEQ: NP_002037 H-INV: HIT000034167 VEGA: OTTHUMP00000174430;OTTHUMP00000174431;OTTHUMP00000174432 Tax_Id=9606 Gene_Symbol=GAPDH Glyceraldehyde-3-phosphate dehydrogenase                                                            |
|       | 8   | IPI: IPI00007144.1 SWISS-PROT: Q9UNX3 ENSEMBL: ENSP00000265100;ENSP00000428177;ENSP00000428223;ENSP00000430147 REFSEQ: NP_057177 H-INV: HIT000037967 VEGA: OTTHUMP00000161072;OTTHUMP00000223519;OTTHUMP00000223520;OTTHUMP00000223521 Tax_Id=9606 Gene_Symbol=RPL26L1 60S ribosomal protein L26-like 1                                                     |
|       | 9   | IPI: IPI00985019.1 H-INV: HIT000329562 Tax_Id=9606 Gene_Symbol=RPL28 Conserved hypothetical protein                                                                                                                                                                                                                                                         |
|       | 10  | IPI: IPI00218343.4 SWISS-PROT: Q9BQE3 ENSEMBL: ENSP00000301072 REFSEQ: NP_116093 H-INV: HIT000279007 Tax_Id=9606 Gene_Symbol=TUBA1C Tubulin alpha-1C chain                                                                                                                                                                                                  |
|       | 11  | IPI: IPI01020905.1 ENSEMBL: ENSP00000084795 Tax_Id=9606 Gene_Symbol=RPL18 Protein                                                                                                                                                                                                                                                                           |
|       | 12  | IPI: IPI00977661.1 REFSEQ: NP_001186284 Tax_Id=9606 Gene_Symbol=RPL17-C18ORF32 RPL17-C18orf32 protein isoform 1                                                                                                                                                                                                                                             |
|       | 13  | IPI: IPI00291467.7 SWISS-PROT: P12236 TREMBL: O75961;Q59EI9;Q6I9V5 ENSEMBL: ENSP00000370808 REFSEQ: NP_001627 VEGA: OTTHUMP00000022826 Tax_Id=9606 Gene_Symbol=SLC25A6 ADP/ATP translocase 3                                                                                                                                                                |
|       | 14  | IPI: IPI00007188.6 SWISS-PROT: P05141 TREMBL: B2RCV1;Q6NVC0 ENSEMBL: ENSP00000360671 REFSEQ: NP_001143 H-INV: HIT000054137 VEGA: OTTHUMP00000024324 Tax_Id=9606 Gene_Symbol=SLC25A5 ADP/ATP translocase 2                                                                                                                                                   |
|       | 15  | IPI: IPI00306332.4 SWISS-PROT: P83731 ENSEMBL: ENSP00000377640 REFSEQ: NP_000977 H-INV: HIT000196873 VEGA: OTTHUMP00000214161 Tax_Id=9606 Gene_Symbol=RPL24 60S ribosomal protein L24                                                                                                                                                                       |
|       | 16  | IPI: IPI00554798.2 SWISS-PROT: Q99879 ENSEMBL: ENSP00000352442 REFSEQ: NP_003512 H-INV: HIT000262644 VEGA: OTTHUMP00000016188 Tax_Id=9606 Gene_Symbol=HIST1H2BM Histone H2B type 1-M                                                                                                                                                                        |
|       | 17  | IPI: IPI00026202.1 SWISS-PROT: Q02543 TREMBL: B2R4C0;B4DUV3;Q53HD3;Q76N54 ENSEMBL: ENSP00000222247 REFSEQ: NP_000971 H-INV: HIT000262210 Tax_Id=9606 Gene_Symbol=RPL18A 60S ribosomal protein L18a                                                                                                                                                          |

|  |    |                                                                                                                                                                                                                                                                                                                       |
|--|----|-----------------------------------------------------------------------------------------------------------------------------------------------------------------------------------------------------------------------------------------------------------------------------------------------------------------------|
|  | 18 | IPI: IPI00021266.1 SWISS-PROT: P62750 ENSEMBL: ENSP00000389103 REFSEQ: NP_000975 H-INV: HIT000259830 VEGA: OTTHUMP00000163536 Tax_Id=9606 Gene_Symbol=RPL23A;SNORD4A 60S ribosomal protein L23a                                                                                                                       |
|  | 19 | IPI: IPI00025091.3 SWISS-PROT: P62280 ENSEMBL: ENSP00000270625 REFSEQ: NP_001006 H-INV: HIT000034861 Tax_Id=9606 Gene_Symbol=RPS11 40S ribosomal protein S11                                                                                                                                                          |
|  | 20 | IPI: IPI00221092.8 SWISS-PROT: P62249 ENSEMBL: ENSP00000251453 REFSEQ: NP_001011 H-INV: HIT000031865;HIT000033564 Tax_Id=9606 Gene_Symbol=RPS16 40S ribosomal protein S16                                                                                                                                             |
|  | 21 | IPI: IPI00848331.1 TREMBL: B7Z4K2 ENSEMBL: ENSP00000386717 REFSEQ: NP_001092047 VEGA: OTTHUMP00000202939 Tax_Id=9606 Gene_Symbol=RPL31 60S ribosomal protein L31 isoform 2                                                                                                                                            |
|  | 22 | IPI: IPI00013296.3 SWISS-PROT: P62269 ENSEMBL: ENSP00000211372;ENSP00000393241;ENSP00000403175;ENSP00000412583;ENSP00000416110 REFSEQ: NP_072045 VEGA: OTTHUMP00000014635;OTTHUMP00000029059;OTTHUMP00000029467;OTTHUMP00000193497;OTTHUMP00000194331 Tax_Id=9606 Gene_Symbol=RPS18;RPS18P9 40S ribosomal protein S18 |
|  | 23 | IPI: IPI00515061.3 SWISS-PROT: P06899 ENSEMBL: ENSP00000342886;ENSP00000445633 REFSEQ: NP_066402 H-INV: HIT000036634 VEGA: OTTHUMP00000016175 Tax_Id=9606 Gene_Symbol=HIST1H2BJ Histone H2B type 1-J                                                                                                                  |
|  | 24 | IPI: IPI00010153.5 SWISS-PROT: P62829 TREMBL: Q9BTQ7 ENSEMBL: ENSP00000377865;ENSP00000420311 REFSEQ: NP_000969 H-INV: HIT000337801 VEGA: OTTHUMP00000164151;OTTHUMP00000164153 Tax_Id=9606 Gene_Symbol=RPL23 60S ribosomal protein L23                                                                               |
|  | 25 | IPI: IPI00218606.7 SWISS-PROT: P62266 TREMBL: A8K517 ENSEMBL: ENSP00000296674 REFSEQ: NP_001016 H-INV: HIT000264179 VEGA: OTTHUMP00000222330 Tax_Id=9606 Gene_Symbol=RPS23 40S ribosomal protein S23                                                                                                                  |
|  | 26 | IPI: IPI00965303.1 TREMBL: D6RAN4 ENSEMBL: ENSP00000421872 VEGA: OTTHUMP00000218429 Tax_Id=9606 Gene_Symbol=RPL9 Uncharacterized protein                                                                                                                                                                              |
|  | 27 | IPI: IPI00026271.5 SWISS-PROT: P62263 ENSEMBL: ENSP00000311028;ENSP00000385425;ENSP00000385958;ENSP00000428509 REFSEQ: NP_001020241;NP_001020242;NP_005608 H-INV: HIT000275460 VEGA: OTTHUMP00000160559;OTTHUMP00000224341;OTTHUMP00000224343 Tax_Id=9606 Gene_Symbol=RPS14 40S ribosomal protein S14                 |
|  | 28 | IPI: IPI00013415.1 SWISS-PROT: P62081 TREMBL: Q57Z92 ENSEMBL: ENSP00000339095;ENSP00000385018;ENSP00000385286 REFSEQ: NP_001002 H-INV: HIT000260253 VEGA: OTTHUMP00000115354;OTTHUMP00000200057;OTTHUMP00000200058 Tax_Id=9606 Gene_Symbol=RPS7 40S ribosomal protein S7                                              |
|  | 29 | IPI: IPI00927658.1 TREMBL: F8W727 ENSEMBL: ENSP00000339064 VEGA: OTTHUMP00000207904 Tax_Id=9606 Gene_Symbol=RPL32 Uncharacterized protein                                                                                                                                                                             |
|  | 30 | IPI: IPI00514530.5 TREMBL: A6NL76;Q5T8M8 ENSEMBL: ENSP00000312351;ENSP00000355644 VEGA: OTTHUMP00000037465 Tax_Id=9606 Gene_Symbol=ACTA1 Uncharacterized protein                                                                                                                                                      |
|  | 31 | IPI: IPI00005719.1 SWISS-PROT: P62820-1 TREMBL: Q5U0I6 ENSEMBL: ENSP00000387286 REFSEQ: NP_004152 H-INV: HIT000295379 VEGA: OTTHUMP00000202271 Tax_Id=9606 Gene_Symbol=RAB1A Isoform 1 of Ras-related protein Rab-1A                                                                                                  |
|  | 32 | IPI: IPI00299573.12 SWISS-PROT: P62424 TREMBL: Q5T8U4 ENSEMBL: ENSP00000361076 REFSEQ: NP_000963 H-INV: HIT000050841 VEGA: OTTHUMP00000022469 Tax_Id=9606 Gene_Symbol=RPL7A;SNORD24 60S ribosomal protein L7a                                                                                                         |
|  | 33 | IPI: IPI00166293.5 SWISS-PROT: Q8N257 ENSEMBL: ENSP00000375736 REFSEQ: NP_778225 H-INV: HIT000016087 VEGA: OTTHUMP00000037947 Tax_Id=9606 Gene_Symbol=HIST3H2BB Histone H2B type 3-B                                                                                                                                  |
|  | 34 | IPI: IPI00376798.3 SWISS-PROT: P62913-1 TREMBL: Q08ES8;Q5VVD0 ENSEMBL: ENSP00000363676 REFSEQ: NP_000966 H-INV: HIT000191669 VEGA: OTTHUMP00000002956 Tax_Id=9606 Gene_Symbol=RPL11 Isoform 1 of 60S ribosomal protein L11                                                                                            |
|  | 35 | IPI: IPI00014898.3 SWISS-PROT: Q15149-1 ENSEMBL: ENSP00000323856 REFSEQ: NP_958782 VEGA: OTTHUMP00000229284 Tax_Id=9606 Gene_Symbol=PLEC Isoform 1 of Plectin                                                                                                                                                         |
|  | 36 | IPI: IPI00024933.3 SWISS-PROT: P30050-1 TREMBL: D3DS95;Q59FI9 ENSEMBL: ENSP00000354739 REFSEQ: NP_000967 H-INV: HIT000301385 VEGA: OTTHUMP00000022186 Tax_Id=9606 Gene_Symbol=RPL12 Isoform 1 of 60S ribosomal protein L12                                                                                            |
|  | 37 | IPI: IPI00977964.1 TREMBL: E9PLL6;Q9BQQ5 ENSEMBL: ENSP00000433259 VEGA: OTTHUMP00000231159 Tax_Id=9606 Gene_Symbol=RPL27A Uncharacterized protein                                                                                                                                                                     |
|  | 38 | IPI: IPI00008433.4 SWISS-PROT: P46782 TREMBL: Q53G25 ENSEMBL: ENSP00000196551 REFSEQ: NP_001000 H-INV: HIT000037112 Tax_Id=9606 Gene_Symbol=RPS5 40S ribosomal protein S5                                                                                                                                             |

|  |    |                                                                                                                                                                                                                                                                                                                                           |
|--|----|-------------------------------------------------------------------------------------------------------------------------------------------------------------------------------------------------------------------------------------------------------------------------------------------------------------------------------------------|
|  | 39 | IPI: IPI00179330.6 SWISS-PROT: P62979 TREMBL: B2RDW1; Q5RKT7 ENSEMBL: ENSP00000272317; ENSP00000383981; ENSP00000385659 REFSEQ: NP_001129064; NP_001170884; NP_002945 H-INV: HIT000384848 VEGA: OTTHUMP00000200786; OTTHUMP00000200788; OTTHUMP00000200789 Tax_Id=9606 Gene_Symbol=RPS27A Ubiquitin-40S ribosomal protein S27a            |
|  | 40 | IPI: IPI00021840.1 SWISS-PROT: P62753 TREMBL: A2A3R6; Q96DV6 ENSEMBL: ENSP00000369757 REFSEQ: NP_001001 H-INV: HIT000278246 VEGA: OTTHUMP00000021120 Tax_Id=9606 Gene_Symbol=RPS6 40S ribosomal protein S6                                                                                                                                |
|  | 41 | IPI: IPI00215914.5 SWISS-PROT: P84077 ENSEMBL: ENSP00000272102; ENSP00000440005; ENSP00000442980 REFSEQ: NP_001019397; NP_001019398; NP_001019399; NP_001649 H-INV: HIT000003095 VEGA: OTTHUMP00000035715 Tax_Id=9606 Gene_Symbol=ARF1 ADP-ribosylation factor 1                                                                          |
|  | 42 | IPI: IPI00298547.3 SWISS-PROT: Q99497 ENSEMBL: ENSP00000340278; ENSP00000366708; ENSP00000366711; ENSP00000418770 REFSEQ: NP_001116849; NP_009193 H-INV: HIT000297741 VEGA: OTTHUMP00000001348; OTTHUMP00000001349; OTTHUMP00000001350; OTTHUMP00000001351 Tax_Id=9606 Gene_Symbol=PARK7 Protein DJ-1                                     |
|  | 43 | IPI: IPI00470528.5 SWISS-PROT: P61313 ENSEMBL: ENSP00000309334; ENSP00000346867; ENSP00000388529; ENSP00000390193; ENSP00000416692 REFSEQ: NP_002939 H-INV: HIT000076179 VEGA: OTTHUMP00000161052; OTTHUMP00000208329; OTTHUMP00000208330; OTTHUMP00000208331; OTTHUMP00000208401 Tax_Id=9606 Gene_Symbol=RPL15 60S ribosomal protein L15 |
|  | 44 | IPI: IPI00796462.1 ENSEMBL: ENSP00000396127 VEGA: OTTHUMP00000166102 Tax_Id=9606 Gene_Symbol=RANP1; RAN 27 kDa protein                                                                                                                                                                                                                    |
|  | 45 | IPI: IPI00915463.1 SWISS-PROT: P62847-3 TREMBL: E7ETK0 ENSEMBL: ENSP00000415549 REFSEQ: NP_001135755 Tax_Id=9606 Gene_Symbol=RPS24 Isoform 3 of 40S ribosomal protein S24                                                                                                                                                                 |
|  | 46 | IPI: IPI00019385.4 SWISS-PROT: P51571 ENSEMBL: ENSP00000317331; ENSP00000359103; ENSP00000359104 REFSEQ: NP_006271 VEGA: OTTHUMP00000025956; OTTHUMP00000025957; OTTHUMP00000025958 Tax_Id=9606 Gene_Symbol=SSR4 Translocon-associated protein subunit delta                                                                              |
|  | 47 | IPI: IPI00216587.9 SWISS-PROT: P62241 TREMBL: Q5JR94 ENSEMBL: ENSP00000379888 REFSEQ: NP_001003 H-INV: HIT000430720 VEGA: OTTHUMP00000010160 Tax_Id=9606 Gene_Symbol=RPS8; SNORD55 40S ribosomal protein S8                                                                                                                               |
|  | 48 | IPI: IPI00221089.5 SWISS-PROT: P62277 ENSEMBL: ENSP00000435777 REFSEQ: NP_001008 H-INV: HIT000191446 VEGA: OTTHUMP00000231640 Tax_Id=9606 Gene_Symbol=RPS13 40S ribosomal protein S13                                                                                                                                                     |
|  | 49 | IPI: IPI00979604.1 TREMBL: F2Z2S8 ENSEMBL: ENSP00000433155 VEGA: OTTHUMP00000229806 Tax_Id=9606 Gene_Symbol=RPS3 Uncharacterized protein                                                                                                                                                                                                  |
|  | 50 | IPI: IPI01020686.1 TREMBL: F8VW92 ENSEMBL: ENSP00000449827 Tax_Id=9606 Gene_Symbol=TUBB Uncharacterized protein                                                                                                                                                                                                                           |
|  | 51 | IPI: IPI00784154.1 SWISS-PROT: P10809 TREMBL: B3GQS7; B7Z4F6; B7Z532; B7Z597; B9VP19; B9VPB4; Q53SE2 ENSEMBL: ENSP00000340019; ENSP00000373620 REFSEQ: NP_002147; NP_955472 H-INV: HIT000031088 VEGA: OTTHUMP00000205744 Tax_Id=9606 Gene_Symbol=HSPD1 60 kDa heat shock protein, mitochondrial                                           |
|  | 52 | IPI: IPI00018219.1 SWISS-PROT: Q15582 ENSEMBL: ENSP00000416330 REFSEQ: NP_000349 H-INV: HIT000029343 VEGA: OTTHUMP00000223339 Tax_Id=9606 Gene_Symbol=TGFBI Transforming growth factor-beta-induced protein ig-h3                                                                                                                         |
|  | 53 | IPI: IPI00027463.1 SWISS-PROT: P06703 TREMBL: B2R577 ENSEMBL: ENSP00000357708; ENSP00000357709 REFSEQ: NP_055439 H-INV: HIT000034143 VEGA: OTTHUMP00000015472; OTTHUMP00000015473 Tax_Id=9606 Gene_Symbol=S100A6 Protein S100-A6                                                                                                          |
|  | 54 | IPI: IPI00171611.7 SWISS-PROT: Q71DI3 ENSEMBL: ENSP00000333277; ENSP00000358154; ENSP00000385479 REFSEQ: NP_001005464; NP_001116847; NP_066403 VEGA: OTTHUMP00000013917; OTTHUMP00000013919; OTTHUMP00000014041 Tax_Id=9606 Gene_Symbol=HIST2H3D; HIST2H3A; HIST2H3C Histone H3.2                                                         |
|  | 55 | IPI: IPI00017334.1 SWISS-PROT: P35232 TREMBL: A8K401; Q53FV0; Q6FHP5; Q6PUJ7 ENSEMBL: ENSP00000300408 REFSEQ: NP_002625 H-INV: HIT000298776 VEGA: OTTHUMP00000165764 Tax_Id=9606 Gene_Symbol=PHB Prohibitin                                                                                                                               |

|  |  |                                                                                                                                                                                                                                                                                                                                                                                                                                                                                                                                                                                                                                                                                                                                                                                                        |
|--|--|--------------------------------------------------------------------------------------------------------------------------------------------------------------------------------------------------------------------------------------------------------------------------------------------------------------------------------------------------------------------------------------------------------------------------------------------------------------------------------------------------------------------------------------------------------------------------------------------------------------------------------------------------------------------------------------------------------------------------------------------------------------------------------------------------------|
|  |  | 56 IPI:IPI00465070.7 SWISS-PROT:P68431 ENSEMBL:ENSP00000244661;ENSP00000329554;ENSP00000350275;ENSP00000352252;ENSP00000353581;ENSP00000358160;ENSP00000366999;ENSP00000367062;ENSP00000439493;ENSP00000439660;ENSP00000444823 REFSEQ:NP_003520;NP_003521;NP_003522;NP_003523;NP_003524;NP_003525;NP_003526;NP_003527;NP_003528;NP_066298 H-INV:HIT000035722;HIT000041284;HIT000053853;HIT000259871;HIT000260307;HIT000262140;HIT000262650;HIT000263305;HIT000263457 VEGA:OTTHUMP00000016132;OTTHUMP00000016133;OTTHUMP00000016135;OTTHUMP00000016149;OTTHUMP00000016150;OTTHUMP00000016151;OTTHUMP00000016152;OTTHUMP00000016182;OTTHUMP00000017803;OTTHUMP00000017804 Tax_Id=9606 Gene_Symbol=HIST1H3H;HIST1H3A;HIST1H3F;HIST1H3B;HIST1H3E;HIST1H3I;HIST1H3J;HIST1H3C;HIST1H3G;HIST1H3D Histone H3.1 |
|  |  | 57 IPI:IPI00219038.9 SWISS-PROT:P84243 TREMBL:A8K4Y7;B2R4P9;B2R6Y1;Q6TXQ4 ENSEMBL:ENSP00000254810;ENSP00000355778;ENSP00000355780;ENSP00000355781 REFSEQ:NP_002098;NP_005315 H-INV:HIT000054194;HIT000271836;HIT000288836 VEGA:OTTHUMP00000035618;OTTHUMP00000035619;OTTHUMP00000035621 Tax_Id=9606 Gene_Symbol=H3F3A;H3F3B;H3F3AP6;H3F3AP4 Histone H3.3                                                                                                                                                                                                                                                                                                                                                                                                                                               |
|  |  | 58 IPI:IPI00219155.5 SWISS-PROT:P61353 TREMBL:B2R4D8;Q6LCU2 ENSEMBL:ENSP00000253788 REFSEQ:NP_000979 H-INV:HIT000336011 Tax_Id=9606 Gene_Symbol=RPL27 60S ribosomal protein L27                                                                                                                                                                                                                                                                                                                                                                                                                                                                                                                                                                                                                        |
|  |  | 59 IPI:IPI00945264.1 TREMBL:C9JYQ9 ENSEMBL:ENSP00000419041 VEGA:OTTHUMP00000213738 Tax_Id=9606 Gene_Symbol=RPL22L1 Uncharacterized protein                                                                                                                                                                                                                                                                                                                                                                                                                                                                                                                                                                                                                                                             |
|  |  | 60 IPI:IPI00964515.1 ENSEMBL:ENSP00000426960 VEGA:OTTHUMP00000223900 Tax_Id=9606 Gene_Symbol=GNB2L1 Protein                                                                                                                                                                                                                                                                                                                                                                                                                                                                                                                                                                                                                                                                                            |
|  |  | 61 IPI:IPI01026568.1 ENSEMBL:ENSP00000452188;ENSP00000452451 Tax_Id=9606 Gene_Symbol=CFL2 17 kDa protein                                                                                                                                                                                                                                                                                                                                                                                                                                                                                                                                                                                                                                                                                               |
|  |  | 62 IPI:IPI00003326.4 SWISS-PROT:P36404 TREMBL:Q53YD8 ENSEMBL:ENSP00000246747;ENSP00000436021 REFSEQ:NP_001658 H-INV:HIT000030968 VEGA:OTTHUMP00000230835;OTTHUMP00000230836 Tax_Id=9606 Gene_Symbol=ARL2 ADP-ribosylation factor-like protein 2                                                                                                                                                                                                                                                                                                                                                                                                                                                                                                                                                        |
|  |  | 63 IPI:IPI00028481.1 SWISS-PROT:P61006 ENSEMBL:ENSP00000300935 REFSEQ:NP_005361 Tax_Id=9606 Gene_Symbol=RAB8A Ras-related protein Rab-8A                                                                                                                                                                                                                                                                                                                                                                                                                                                                                                                                                                                                                                                               |
|  |  | 64 IPI:IPI00215918.3 SWISS-PROT:P18085 ENSEMBL:ENSP00000306010 REFSEQ:NP_001651 H-INV:HIT000272128 VEGA:OTTHUMP00000213140 Tax_Id=9606 Gene_Symbol=ARF4 ADP-ribosylation factor 4                                                                                                                                                                                                                                                                                                                                                                                                                                                                                                                                                                                                                      |
|  |  | 65 IPI:IPI00216237.5 SWISS-PROT:Q9Y3U8 TREMBL:Q9BYF3 ENSEMBL:ENSP00000252543;ENSP00000378081 REFSEQ:NP_056229;NP_378669 H-INV:HIT000295557 Tax_Id=9606 Gene_Symbol=RPL36 60S ribosomal protein L36                                                                                                                                                                                                                                                                                                                                                                                                                                                                                                                                                                                                     |
|  |  | 66 IPI:IPI00219153.4 SWISS-PROT:P35268 TREMBL:Q7Z4W8;Q8WYP0;Q9BYF5 ENSEMBL:ENSP00000346088 REFSEQ:NP_000974 H-INV:HIT000322310;HIT000334037 VEGA:OTTHUMP00000001141 Tax_Id=9606 Gene_Symbol=RPL22 60S ribosomal protein L22                                                                                                                                                                                                                                                                                                                                                                                                                                                                                                                                                                            |
|  |  | 67 IPI:IPI00219861.3 SWISS-PROT:P24666-1 TREMBL:Q59EH3 ENSEMBL:ENSP00000272065 REFSEQ:NP_004291 H-INV:HIT000196541 VEGA:OTTHUMP00000109538 Tax_Id=9606 Gene_Symbol=ACPI Isoform 1 of Low molecular weight phosphotyrosine protein phosphatase                                                                                                                                                                                                                                                                                                                                                                                                                                                                                                                                                          |
|  |  | 68 IPI:IPI00412607.6 SWISS-PROT:P42766 ENSEMBL:ENSP00000259469 REFSEQ:NP_009140 H-INV:HIT000029540 VEGA:OTTHUMP00000022107 Tax_Id=9606 Gene_Symbol=RPL35 60S ribosomal protein L35                                                                                                                                                                                                                                                                                                                                                                                                                                                                                                                                                                                                                     |
|  |  | 69 IPI:IPI00642457.1 ENSEMBL:ENSP00000397007 REFSEQ:NP_001025189 Tax_Id=9606 Gene_Symbol=APRT adenine phosphoribosyltransferase isoform b                                                                                                                                                                                                                                                                                                                                                                                                                                                                                                                                                                                                                                                              |
|  |  | 70 IPI:IPI00807428.1 TREMBL:A0A5E4 Tax_Id=9606 Gene_Symbol=- Putative uncharacterized protein                                                                                                                                                                                                                                                                                                                                                                                                                                                                                                                                                                                                                                                                                                          |
|  |  | 71 IPI:IPI00853161.5 ENSEMBL:ENSP00000388600 H-INV:HIT000040175 VEGA:OTTHUMP00000183506 Tax_Id=9606 Gene_Symbol=SNORA70;RPL10 60S ribosomal protein L10                                                                                                                                                                                                                                                                                                                                                                                                                                                                                                                                                                                                                                                |
|  |  | 72 IPI:IPI00853337.1 TREMBL:C9J1Z8 ENSEMBL:ENSP00000412701 VEGA:OTTHUMP00000196795 Tax_Id=9606 Gene_Symbol=ARF5 Uncharacterized protein                                                                                                                                                                                                                                                                                                                                                                                                                                                                                                                                                                                                                                                                |
|  |  | 73 IPI:IPI00981943.1 TREMBL:E9PKE3 ENSEMBL:ENSP00000433584 VEGA:OTTHUMP00000231749 Tax_Id=9606 Gene_Symbol=HSPA8 Uncharacterized protein                                                                                                                                                                                                                                                                                                                                                                                                                                                                                                                                                                                                                                                               |
|  |  | 74 IPI:IPI00329573.9 SWISS-PROT:Q99715-1 TREMBL:B9EJB8 ENSEMBL:ENSP00000325146 REFSEQ:NP_004361 H-INV:HIT000221229 VEGA:OTTHUMP00000016752 Tax_Id=9606 Gene_Symbol=COL12A1 Isoform 1 of Collagen alpha-1(XII) chain                                                                                                                                                                                                                                                                                                                                                                                                                                                                                                                                                                                    |
|  |  | 75 IPI:IPI00376005.2 SWISS-PROT:P63241-2 ENSEMBL:ENSP00000336702 REFSEQ:NP_001137232 H-INV:HIT000250756 Tax_Id=9606 Gene_Symbol=EIF5A Isoform 2 of Eukaryotic translation initiation factor 5A-1                                                                                                                                                                                                                                                                                                                                                                                                                                                                                                                                                                                                       |
|  |  | 76 IPI:IPI00025491.1 SWISS-PROT:P60842 TREMBL:A8K088;A8K7F6;B4DNH2;Q9NZR9 ENSEMBL:ENSP00000293831 REFSEQ:NP_001407 H-INV:HIT000281563;HIT000333951 VEGA:OTTHUMP00000135288 Tax_Id=9606 Gene_Symbol=EIF4A1 Eukaryotic initiation factor 4A-I                                                                                                                                                                                                                                                                                                                                                                                                                                                                                                                                                            |



|    |                                                                                                                                                                                                                                                                                                                                                                                                                                                                                                                                                                                                                                                                                                                                                                                                                                                                                                                                                                                                                                                                                                                                                                                                                                                                                                              |
|----|--------------------------------------------------------------------------------------------------------------------------------------------------------------------------------------------------------------------------------------------------------------------------------------------------------------------------------------------------------------------------------------------------------------------------------------------------------------------------------------------------------------------------------------------------------------------------------------------------------------------------------------------------------------------------------------------------------------------------------------------------------------------------------------------------------------------------------------------------------------------------------------------------------------------------------------------------------------------------------------------------------------------------------------------------------------------------------------------------------------------------------------------------------------------------------------------------------------------------------------------------------------------------------------------------------------|
| 77 | IPI: IPI00014424.1 SWISS-PROT: Q05639 ENSEMBL: ENSP00000217182; ENSP00000298049 REFSEQ: NP_001949 H-INV: HIT000386552 VEGA: OTTHUMP00000031776<br>Tax_Id=9606 Gene_Symbol=EEF1A2 Elongation factor 1-alpha 2                                                                                                                                                                                                                                                                                                                                                                                                                                                                                                                                                                                                                                                                                                                                                                                                                                                                                                                                                                                                                                                                                                 |
| 78 | IPI: IPI01010856.2 TREMBL: B4DMC6; B4DRE8; F5GZG3; F5H370 ENSEMBL: ENSP00000445379 Tax_Id=9606 Gene_Symbol=EEF2 Uncharacterized protein                                                                                                                                                                                                                                                                                                                                                                                                                                                                                                                                                                                                                                                                                                                                                                                                                                                                                                                                                                                                                                                                                                                                                                      |
| 79 | IPI: IPI00479186.7 SWISS-PROT: P14618-1 ENSEMBL: ENSP00000334983 REFSEQ: NP_002645 H-INV: HIT000029665 Tax_Id=9606 Gene_Symbol=PKM2 Isoform M2 of Pyruvate kinase isozymes M1/M2                                                                                                                                                                                                                                                                                                                                                                                                                                                                                                                                                                                                                                                                                                                                                                                                                                                                                                                                                                                                                                                                                                                             |
| 80 | IPI: IPI00081836.3 SWISS-PROT: Q96KK5 TREMBL: A3KPC7 ENSEMBL: ENSP00000366679 REFSEQ: NP_542163 H-INV: HIT000334824 VEGA: OTTHUMP00000016173<br>Tax_Id=9606 Gene_Symbol=HIST1H2AH; HIST1H2AG; HIST1H2AK; HIST1H2AL; HIST1H2AM; HIST1H2AJ; HIST1H2AI Histone H2A type 1-H                                                                                                                                                                                                                                                                                                                                                                                                                                                                                                                                                                                                                                                                                                                                                                                                                                                                                                                                                                                                                                     |
| 81 | IPI: IPI00013895.1 SWISS-PROT: P31949 TREMBL: B2R5H0 ENSEMBL: ENSP00000271638 REFSEQ: NP_005611 H-INV: HIT000101457 VEGA: OTTHUMP00000015271<br>Tax_Id=9606 Gene_Symbol=S100A11 Protein S100-A11                                                                                                                                                                                                                                                                                                                                                                                                                                                                                                                                                                                                                                                                                                                                                                                                                                                                                                                                                                                                                                                                                                             |
| 82 | IPI: IPI00031562.3 SWISS-PROT: Q7L7L0 ENSEMBL: ENSP00000355656 REFSEQ: NP_254280 H-INV: HIT000030212 VEGA: OTTHUMP00000037948 Tax_Id=9606<br>Gene_Symbol=HIST3H2A Histone H2A type 3                                                                                                                                                                                                                                                                                                                                                                                                                                                                                                                                                                                                                                                                                                                                                                                                                                                                                                                                                                                                                                                                                                                         |
| 83 | IPI: IPI00247583.5 SWISS-PROT: P46778 TREMBL: Q6IAX2 ENSEMBL: ENSP00000346027; ENSP00000351021; ENSP00000370569; ENSP00000370574 REFSEQ: NP_000973 H-<br>INV: HIT000056316 VEGA: OTTHUMP00000018163; OTTHUMP00000018164; OTTHUMP00000018165; OTTHUMP00000018166 Tax_Id=9606<br>Gene_Symbol=RPL21; SNORD102; SNORA27; RPL21P19 60S ribosomal protein L21                                                                                                                                                                                                                                                                                                                                                                                                                                                                                                                                                                                                                                                                                                                                                                                                                                                                                                                                                      |
| 84 | IPI: IPI00008438.1 SWISS-PROT: P46783 ENSEMBL: ENSP00000347271 REFSEQ: NP_001005; NP_001190174; NP_001191020 H-<br>INV: HIT000265025 VEGA: OTTHUMP00000016229 Tax_Id=9606 Gene_Symbol=RPS10 40S ribosomal protein S10                                                                                                                                                                                                                                                                                                                                                                                                                                                                                                                                                                                                                                                                                                                                                                                                                                                                                                                                                                                                                                                                                        |
| 85 | IPI: IPI00029731.8 SWISS-PROT: P18077 ENSEMBL: ENSP00000393393; ENSP00000419117 REFSEQ: NP_000987 H-<br>INV: HIT000035138 VEGA: OTTHUMP00000207884; OTTHUMP00000207885 Tax_Id=9606 Gene_Symbol=RPL35A 60S ribosomal protein L35a                                                                                                                                                                                                                                                                                                                                                                                                                                                                                                                                                                                                                                                                                                                                                                                                                                                                                                                                                                                                                                                                             |
| 86 | IPI: IPI00218448.4 SWISS-PROT: POC0S5 ENSEMBL: ENSP00000296417 REFSEQ: NP_002097 H-INV: HIT000337335 VEGA: OTTHUMP00000161678 Tax_Id=9606<br>Gene_Symbol=H2AFZ Histone H2A.Z                                                                                                                                                                                                                                                                                                                                                                                                                                                                                                                                                                                                                                                                                                                                                                                                                                                                                                                                                                                                                                                                                                                                 |
| 87 | IPI: IPI00794659.1 TREMBL: B4DW28 ENSEMBL: ENSP00000429374 REFSEQ: NP_001139699 VEGA: OTTHUMP00000226396 Tax_Id=9606 Gene_Symbol=SNORD54; RPS20 40S<br>ribosomal protein S20 isoform 1                                                                                                                                                                                                                                                                                                                                                                                                                                                                                                                                                                                                                                                                                                                                                                                                                                                                                                                                                                                                                                                                                                                       |
| 88 | IPI: IPI00003588.1 SWISS-PROT: O43324 ENSEMBL: ENSP00000369038 REFSEQ: NP_004271 H-INV: HIT000032350 VEGA: OTTHUMP00000016008 Tax_Id=9606<br>Gene_Symbol=EEF1E1 Eukaryotic translation elongation factor 1 epsilon-1                                                                                                                                                                                                                                                                                                                                                                                                                                                                                                                                                                                                                                                                                                                                                                                                                                                                                                                                                                                                                                                                                         |
| 89 | IPI: IPI00008529.1 SWISS-PROT: P05387 TREMBL: Q6FG96 ENSEMBL: ENSP00000322419; ENSP00000431240 REFSEQ: NP_000995 H-<br>INV: HIT000032403 VEGA: OTTHUMP00000164440; OTTHUMP00000229016 Tax_Id=9606 Gene_Symbol=RPLP2 60S acidic ribosomal protein P2                                                                                                                                                                                                                                                                                                                                                                                                                                                                                                                                                                                                                                                                                                                                                                                                                                                                                                                                                                                                                                                          |
| 90 | IPI: IPI00016373.3 SWISS-PROT: P51153 TREMBL: Q504R6 ENSEMBL: ENSP00000357564 REFSEQ: NP_002861 H-INV: HIT000323532 VEGA: OTTHUMP00000034758<br>Tax_Id=9606 Gene_Symbol=RAB13 Ras-related protein Rab-13                                                                                                                                                                                                                                                                                                                                                                                                                                                                                                                                                                                                                                                                                                                                                                                                                                                                                                                                                                                                                                                                                                     |
| 91 | IPI: IPI00016513.5 SWISS-PROT: P61026 TREMBL: Q53SX4; Q53T70; Q9UL28 ENSEMBL: ENSP00000264710 REFSEQ: NP_057215 H-<br>INV: HIT000006497 VEGA: OTTHUMP00000120025 Tax_Id=9606 Gene_Symbol=RAB10 Ras-related protein Rab-10                                                                                                                                                                                                                                                                                                                                                                                                                                                                                                                                                                                                                                                                                                                                                                                                                                                                                                                                                                                                                                                                                    |
| 92 | IPI: IPI00016669.1 SWISS-PROT: Q15382 TREMBL: A8K005; Q6NZ61 ENSEMBL: ENSP00000262187 REFSEQ: NP_005605 H-INV: HIT000045319 VEGA: OTTHUMP00000211964<br>Tax_Id=9606 Gene_Symbol=RHEB GTP-binding protein Rheb                                                                                                                                                                                                                                                                                                                                                                                                                                                                                                                                                                                                                                                                                                                                                                                                                                                                                                                                                                                                                                                                                                |
| 93 | IPI: IPI00017510.3 SWISS-<br>PROT: P00403 TREMBL: A0S0W7; A0S2P1; A0S3T1; A0SA07; A1Z455; A1Z4V2; A4ZKZ0; A6YW54; A6YWD1; A6YXV0; A6Z3M5; A6Z6E8; A6ZEU4; A6ZF47; A6ZFK3; A6ZHA9; A7L<br>DC6; A7LF11; A7LFA2; B0Z6W4; B1W855; B2CB37; B2WRY8; B2XHF9; B2XHT9; B2XIR3; B2XL43; B2XP28; B2XPS3; B2YKU2; B3DE06; B3GUF3; B5M7M0; C5H6K5; C5H6K6; C5H<br>6K7; C5H6L3; C5H6M3; C5H6M4; C5H6M5; C5H6M7; C5H6M8; C8XWJ6; C8Y3G4; C8Y3Q5; C8YBL1; C9D661; D1G421; D2IKF4; D2K1G3; D2Y6Y1; D2Y6Y2; D3WYY7; D3WYY8; D3<br>WYY9; D3YPT7; D5M8T1; D7NUN3; E0AF97; E2DTL8; E2JFC4; E2JJS5; E5DZN4; E5E079; E5E1A6; E5E1V1; E5EWG2; E5EWL4; E5EWR3; E5FWC0; E7CM18; E7CNQ9; E7E4E0; E9LA<br>G1; E9P659; F1AZ87; F1AZF2; F1CIN6; F2WGV2; F2WI31; F2WJ84; Q06TE6; Q09U41; Q0Z7D8; Q0Z7F1; Q0Z7J0; Q0Z7K3; Q0Z7S0; Q14XI3; Q14XT3; Q15HH9; Q19MP7; Q305H0; Q4EY<br>L1; Q4EZD4; Q4F4V6; Q4F6A2; Q4GCC3; Q4GCG2; Q4GCZ4; Q4GHE1; Q4GQP0; Q4GVP5; Q4GW12; Q4R1L3; Q4R1L5; Q5S971; Q5SA98; Q5SAP1; Q5SB08; Q5XRW8; Q6R0V6; Q6RK<br>W8; Q6RNN7; Q6RQ80; Q6VIG7; Q6VJD8; Q6VJJ3; Q7GXZ8; Q7Y626; Q7Y6M3; Q7Y6N0; Q7YCE6; Q7YEH2; Q8SKS0; Q8HNR1; Q8HNR6; Q8HQB7; Q8WCW3; Q9B138; Q9B1F9; Q9B<br>2U8 ENSEMBL: ENSP00000354876 REFSEQ: YP_003024029 H-INV: HIT000088112 Tax_Id=9606 Gene_Symbol=MT-CO2 Cytochrome c oxidase subunit 2 |

|  |             |                                                                                                                                                                                                                                                                                                                        |
|--|-------------|------------------------------------------------------------------------------------------------------------------------------------------------------------------------------------------------------------------------------------------------------------------------------------------------------------------------|
|  | 94          | IPI: IPI00024067.4 SWISS-PROT: Q00610-1 TREMBL: Q49AL0 ENSEMBL: ENSP00000269122 REFSEQ: NP_004850 H-INV: HIT000054067 VEGA: OTTHUMP00000165784<br>Tax_Id=9606 Gene_Symbol=CLTC Isoform 1 of Clathrin heavy chain 1                                                                                                     |
|  | 95          | IPI: IPI00030179.3 SWISS-PROT: P18124 TREMBL: O95036 ENSEMBL: ENSP00000339795 REFSEQ: NP_000962 H-INV: HIT000034462 VEGA: OTTHUMP00000166002<br>Tax_Id=9606 Gene_Symbol=RPL7P32;RPL7 60S ribosomal protein L7                                                                                                          |
|  | 96          | IPI: IPI00031169.1 SWISS-PROT: P61019 ENSEMBL: ENSP00000262646 REFSEQ: NP_002856 H-INV: HIT000284541 VEGA: OTTHUMP00000165916 Tax_Id=9606<br>Gene_Symbol=RAB2A Ras-related protein Rab-2A                                                                                                                              |
|  | 97          | IPI: IPI00221091.9 SWISS-PROT: P62244 TREMBL: A8K7H3;B2R4W8 ENSEMBL: ENSP00000318646 REFSEQ: NP_001010;NP_001025180 H-<br>INV: HIT000338243 VEGA: OTTHUMP00000162054 Tax_Id=9606 Gene_Symbol=RPS15A 40S ribosomal protein S15a                                                                                         |
|  | 98          | IPI: IPI00221093.7 SWISS-PROT: P08708;P0CW22 ENSEMBL: ENSP00000346045;ENSP00000346046 REFSEQ: NP_001012;NP_001185986 H-<br>INV: HIT000021991 VEGA: OTTHUMP00000190866 Tax_Id=9606 Gene_Symbol=RPS17;RPS17L 40S ribosomal protein S17                                                                                   |
|  | 99          | IPI: IPI00291751.6 SWISS-PROT: Q8WWC4 ENSEMBL: ENSP00000295079;ENSP00000376111 REFSEQ: NP_078796 H-INV: HIT000009482 VEGA: OTTHUMP00000163659<br>Tax_Id=9606 Gene_Symbol=C2orf47 Uncharacterized protein C2orf47, mitochondrial                                                                                        |
|  | 100         | IPI: IPI00293746.2 SWISS-PROT: Q9BU76-1 ENSEMBL: ENSP00000272139 REFSEQ: NP_077295 H-INV: HIT000031233 VEGA: OTTHUMP00000035918 Tax_Id=9606<br>Gene_Symbol=C1orf35 Isoform 1 of Multiple myeloma tumor-associated protein 2                                                                                            |
|  | 101(RAB11A) | IPI: IPI00429190.4 SWISS-PROT: P62491 TREMBL: B4DMN1 ENSEMBL: ENSP00000261890 REFSEQ: NP_004654 H-INV: HIT000285646 VEGA: OTTHUMP00000164214<br>Tax_Id=9606 Gene_Symbol=RAB11A cDNA FLJ61136, highly similar to Ras-related protein Rab-11A                                                                            |
|  | 102         | IPI: IPI00790262.1 TREMBL: E7ETI0 ENSEMBL: ENSP00000380427 H-INV: HIT000039884 VEGA: OTTHUMP00000220174 Tax_Id=9606 Gene_Symbol=ARPC4-TLL3<br>Uncharacterized protein                                                                                                                                                  |
|  | 103         | IPI: IPI00930049.1 TREMBL: Q2YDC2 ENSEMBL: ENSP00000423815 VEGA: OTTHUMP00000221465 Tax_Id=9606 Gene_Symbol=PDCD6 Uncharacterized protein                                                                                                                                                                              |
|  | 104         | IPI: IPI00945337.1 TREMBL: C9J4V0 ENSEMBL: ENSP00000417155 VEGA: OTTHUMP00000216583 Tax_Id=9606 Gene_Symbol=RAB7A Uncharacterized protein                                                                                                                                                                              |
|  | 105         | IPI: IPI00976899.1 TREMBL: E9PKZ0 ENSEMBL: ENSP00000433464;ENSP00000434535 VEGA: OTTHUMP00000229068;OTTHUMP00000229072 Tax_Id=9606<br>Gene_Symbol=RPL8 Uncharacterized protein                                                                                                                                         |
|  | 106         | IPI: IPI00979595.1 TREMBL: E9PQD7 ENSEMBL: ENSP00000436865 VEGA: OTTHUMP00000231872 Tax_Id=9606 Gene_Symbol=RPS2 Uncharacterized protein                                                                                                                                                                               |
|  | 107         | IPI: IPI01013219.1 TREMBL: F5GY37 ENSEMBL: ENSP00000440317 VEGA: OTTHUMP00000239843 Tax_Id=9606 Gene_Symbol=PHB2 Uncharacterized protein                                                                                                                                                                               |
|  | 108         | IPI: IPI00382470.3 SWISS-PROT: P07900-2 TREMBL: Q86SX1 ENSEMBL: ENSP00000335153 REFSEQ: NP_001017963 Tax_Id=9606 Gene_Symbol=HSP90AA1 Isoform 2 of Heat<br>shock protein HSP 90-alpha                                                                                                                                  |
|  | 109         | IPI: IPI00414676.6 SWISS-<br>PROT: P08238 TREMBL: A8K3W9;B4DGL0;B4DMA2;Q6PK50;Q9H6X9 ENSEMBL: ENSP00000325875;ENSP00000360609;ENSP00000360709 REFSEQ: NP_031381 H-<br>INV: HIT000253179 VEGA: OTTHUMP00000016517;OTTHUMP00000016518;OTTHUMP00000016519 Tax_Id=9606 Gene_Symbol=HSP90AB1 Heat shock protein HSP 90-beta |
|  | 110         | IPI: IPI00465248.5 SWISS-PROT: P06733-1 TREMBL: A4UCS8 ENSEMBL: ENSP00000234590 REFSEQ: NP_001419 H-INV: HIT000270987 VEGA: OTTHUMP00000001706<br>Tax_Id=9606 Gene_Symbol=ENO1 Isoform alpha-enolase of Alpha-enolase                                                                                                  |
|  | 111         | IPI: IPI00900293.1 TREMBL: B2ZZ83 ENSEMBL: ENSP00000420213 REFSEQ: NP_001157789 VEGA: OTTHUMP00000214208 Tax_Id=9606 Gene_Symbol=FLNB filamin-B isoform                                                                                                                                                                |
|  | 112         | IPI: IPI00942979.1 SWISS-PROT: P29401 TREMBL: Q53EM5 ENSEMBL: ENSP00000405455;ENSP00000417773 REFSEQ: NP_001055;NP_001128527 H-<br>INV: HIT000055895 VEGA: OTTHUMP00000212664;OTTHUMP00000212668 Tax_Id=9606 Gene_Symbol=TKT Transketolase                                                                             |
|  | 113         | IPI: IPI01015196.1 TREMBL: B7Z1C9 ENSEMBL: ENSP00000438462 Tax_Id=9606 Gene_Symbol=CCT7 cDNA FLJ59454, highly similar to T-complex protein 1 subunit eta                                                                                                                                                               |
|  | 114         | IPI: IPI00011416.2 SWISS-PROT: Q13011 ENSEMBL: ENSP00000221418 REFSEQ: NP_001389 H-INV: HIT000035456 Tax_Id=9606 Gene_Symbol=ECH1 Delta(3,5)-Delta(2,4)-<br>dienoyl-CoA isomerase, mitochondrial                                                                                                                       |
|  | 115         | IPI: IPI00013917.3 SWISS-PROT: P25398 ENSEMBL: ENSP00000230050 REFSEQ: NP_001007 H-INV: HIT000335217 VEGA: OTTHUMP00000017230 Tax_Id=9606<br>Gene_Symbol=RPS12 40S ribosomal protein S12                                                                                                                               |
|  | 116         | IPI: IPI00027230.3 SWISS-PROT: P14625 TREMBL: Q59FC6;Q5CAQ5 ENSEMBL: ENSP00000299767 REFSEQ: NP_003290 H-INV: HIT000262289 Tax_Id=9606<br>Gene_Symbol=HSP90B1 Endoplasmic                                                                                                                                              |

|     |                                                                                                                                                                                                                                                                                                                                                                                                                   |
|-----|-------------------------------------------------------------------------------------------------------------------------------------------------------------------------------------------------------------------------------------------------------------------------------------------------------------------------------------------------------------------------------------------------------------------|
| 117 | IPI: IPI00419919.6 SWISS-PROT: P47914 TREMBL: A8K0H3; Q5T1D1; Q6IPI ENSEMBL: ENSP00000294189; ENSP00000417048; ENSP00000418153; ENSP00000418346; ENSP00000418868; ENSP00000420673 REFSEQ: NP_000983 H-INV: HIT000034082 VEGA: OTTHUMP00000212470; OTTHUMP00000212473; OTTHUMP00000212474; OTTHUMP00000212475; OTTHUMP00000212476; OTTHUMP00000212477 Tax_Id=9606 Gene_Symbol=RPL29; RPL29P4 Ribosomal protein L29 |
| 118 | IPI: IPI00455315.4 SWISS-PROT: P07355-1 ENSEMBL: ENSP00000379342; ENSP00000387545; ENSP00000411352 REFSEQ: NP_001002857; NP_001129487; NP_004030 H-INV: HIT000334547 VEGA: OTTHUMP00000163650 Tax_Id=9606 Gene_Symbol=ANXA2 Isoform 1 of Annexin A2                                                                                                                                                               |
| 119 | IPI: IPI00641266.4 TREMBL: B7ZA96; C9JWY7 ENSEMBL: ENSP00000399949; ENSP00000413158 REFSEQ: NP_001139540 VEGA: OTTHUMP00000035498 Tax_Id=9606 Gene_Symbol=CAPN2 calpain-2 catalytic subunit isoform 2                                                                                                                                                                                                             |
| 120 | IPI: IPI01022836.1 TREMBL: F8VPV9 ENSEMBL: ENSP00000450297 Tax_Id=9606 Gene_Symbol=ATP5B Uncharacterized protein                                                                                                                                                                                                                                                                                                  |
| 121 | IPI: IPI00000494.6 SWISS-PROT: P46777 TREMBL: A2RUM7; Q59GX9; Q9BUV4 ENSEMBL: ENSP00000359345 REFSEQ: NP_000960 H-INV: HIT000291718 VEGA: OTTHUMP00000012584 Tax_Id=9606 Gene_Symbol=SNORD21; RPL5 60S ribosomal protein L5                                                                                                                                                                                       |
| 122 | IPI: IPI00009342.1 SWISS-PROT: P46940 TREMBL: A4QPB0; B4DNP4; B4E2M0; F5H7A1; Q05DN7; Q5FWG8; Q6P1N4; Q96PA3 ENSEMBL: ENSP00000268182 REFSEQ: NP_003861 H-                                                                                                                                                                                                                                                        |
| 123 | IPI: IPI00012750.3 SWISS-PROT: P62851 ENSEMBL: ENSP00000435096 REFSEQ: NP_001019 H-INV: HIT000031580 VEGA: OTTHUMP00000232696 Tax_Id=9606 Gene_Symbol=RPS25 40S ribosomal protein S25                                                                                                                                                                                                                             |
| 124 | IPI: IPI00015148.3 SWISS-PROT: P61224 ENSEMBL: ENSP00000250559; ENSP00000377085; ENSP00000439966; ENSP00000441275 REFSEQ: NP_001010942; NP_056461 H-INV: HIT000291422 VEGA: OTTHUMP00000165026; OTTHUMP00000165027; OTTHUMP00000165028; OTTHUMP00000240363 Tax_Id=9606 Gene_Symbol=RAP1B Ras-related protein Rap-1b                                                                                               |
| 125 | IPI: IPI00016372.1 SWISS-PROT: P51151 ENSEMBL: ENSP00000420127 REFSEQ: NP_001182257; NP_004242 H-INV: HIT000037913 VEGA: OTTHUMP00000022936 Tax_Id=9606 Gene_Symbol=RAB9A Ras-related protein Rab-9A                                                                                                                                                                                                              |
| 126 | IPI: IPI00184546.4 SWISS-PROT: Q8WUH6 TREMBL: B3KMF8 ENSEMBL: ENSP00000280756; ENSP00000446537; ENSP00000446717; ENSP00000449106; ENSP00000449785; ENSP00000450350 REFSEQ: NP_0689474 H-INV: HIT000004205 Tax_Id=9606 Gene_Symbol=C12orf23 UPF0444 transmembrane protein C12orf23                                                                                                                                 |
| 127 | IPI: IPI00215780.5 SWISS-PROT: P39019 TREMBL: B0ZBD0; Q8WVX7 ENSEMBL: ENSP00000221975 REFSEQ: NP_001013 H-INV: HIT000038368 Tax_Id=9606 Gene_Symbol=RPS19 40S ribosomal protein S19                                                                                                                                                                                                                               |
| 128 | IPI: IPI00217467.3 SWISS-PROT: P10412 TREMBL: A3R0T7; A3R0T8; B2R984; Q4VB24 ENSEMBL: ENSP00000307705 REFSEQ: NP_005312 H-INV: HIT000335456 VEGA: OTTHUMP00000016139 Tax_Id=9606 Gene_Symbol=HIST1H1E Histone H1.4                                                                                                                                                                                                |
| 129 | IPI: IPI00217943.3 SWISS-PROT: P20340-2 ENSEMBL: ENSP00000311449; ENSP00000377201 REFSEQ: NP_002860 H-INV: HIT000263043 VEGA: OTTHUMP00000165966; OTTHUMP00000237641 Tax_Id=9606 Gene_Symbol=RAB6A Isoform 2 of Ras-related protein Rab-6A                                                                                                                                                                        |
| 130 | IPI: IPI00219160.3 SWISS-PROT: P49207 TREMBL: Q5MK14 ENSEMBL: ENSP00000378160; ENSP00000378162; ENSP00000378163; ENSP00000423316; ENSP00000423983 REFSEQ: NP_000986; NP_296374 H-INV: HIT000030641 VEGA: OTTHUMP00000162661; OTTHUMP00000162662; OTTHUMP00000219601; OTTHUMP00000219602; OTTHUMP00000219603 Tax_Id=9606 Gene_Symbol=RPL34 60S ribosomal protein L34                                               |
| 131 | IPI: IPI00293434.2 SWISS-PROT: P37108 ENSEMBL: ENSP00000267884 REFSEQ: NP_003125 H-INV: HIT000299445 Tax_Id=9606 Gene_Symbol=SRP14 Signal recognition particle 14 kDa protein                                                                                                                                                                                                                                     |
| 132 | IPI: IPI00296713.4 SWISS-PROT: P28799-1 TREMBL: B4DJJ2; Q53HQ8 ENSEMBL: ENSP00000053867 REFSEQ: NP_002078 H-INV: HIT000064619 Tax_Id=9606 Gene_Symbol=GRN Isoform 1 of Granulins                                                                                                                                                                                                                                  |
| 133 | IPI: IPI00398625.5 SWISS-PROT: Q86YZ3 TREMBL: Q5DT20; Q5W8V9 ENSEMBL: ENSP00000357791 REFSEQ: NP_001009931 H-INV: HIT000331814 VEGA: OTTHUMP00000014118 Tax_Id=9606 Gene_Symbol=HRNR Hornerin                                                                                                                                                                                                                     |
| 134 | IPI: IPI00414554.5 SWISS-PROT: Q9BPX5 TREMBL: B3KPC7 ENSEMBL: ENSP00000259477; ENSP00000345361 REFSEQ: NP_112240 H-INV: HIT000286251 VEGA: OTTHUMP00000022110; OTTHUMP00000022111 Tax_Id=9606 Gene_Symbol=ARPC5L Actin-related protein 2/3 complex subunit 5-like protein                                                                                                                                         |

|     |                                                                                                                                                                                                                                                                         |
|-----|-------------------------------------------------------------------------------------------------------------------------------------------------------------------------------------------------------------------------------------------------------------------------|
| 135 | IPI: IPI00419585.9 SWISS-PROT: P62937 TREMBL: A8K220;A8K486;B2RE56;Q71V99 ENSEMBL: ENSP00000419425 REFSEQ: NP_066953 H-INV: HIT000049372 VEGA: OTTHUMP00000159501 Tax_Id=9606 Gene_Symbol=PPIA Peptidyl-prolyl cis-trans isomerase A                                    |
| 136 | IPI: IPI00465361.4 SWISS-PROT: P26373 TREMBL: A8K4C8;Q6NZ55 ENSEMBL: ENSP00000307889;ENSP00000376811 REFSEQ: NP_000968;NP_150254 H-INV: HIT000047452 VEGA: OTTHUMP00000165255;OTTHUMP00000165256 Tax_Id=9606 Gene_Symbol=RPL13 60S ribosomal protein L13                |
| 137 | IPI: IPI00478410.2 SWISS-PROT: P36542-1 TREMBL: Q6I9V2;Q8TAS0 ENSEMBL: ENSP00000349142 REFSEQ: NP_001001973 H-INV: HIT000100602 VEGA: OTTHUMP00000019068 Tax_Id=9606 Gene_Symbol=ATP5C1 Isoform Liver of ATP synthase subunit gamma, mitochondrial                      |
| 138 | IPI: IPI00514501.1 TREMBL: Q5TDF0 ENSEMBL: ENSP00000355586 VEGA: OTTHUMP00000035942 Tax_Id=9606 Gene_Symbol=NTPCR Uncharacterized protein                                                                                                                               |
| 139 | IPI: IPI00555744.6 SWISS-PROT: P50914 TREMBL: A8K3Q9;A8K7N0;Q6IPH7 ENSEMBL: ENSP00000345156;ENSP00000379506 REFSEQ: NP_001030168;NP_003964 H-INV: HIT000296893 VEGA: OTTHUMP000000209120;OTTHUMP00000209139 Tax_Id=9606 Gene_Symbol=RPL14 Ribosomal protein L14 variant |
| 140 | IPI: IPI00644667.1 TREMBL: Q5SQT8 ENSEMBL: ENSP00000362333 VEGA: OTTHUMP00000019746 Tax_Id=9606 Gene_Symbol=SAR1A Uncharacterized protein                                                                                                                               |
| 141 | IPI: IPI00645518.1 SWISS-PROT: O14735-1 TREMBL: A8K3L7;B3KSW0;Q53HA5 ENSEMBL: ENSP00000219789 REFSEQ: NP_006310 H-INV: HIT000022545 VEGA: OTTHUMP00000162985 Tax_Id=9606 Gene_Symbol=CDIPT Isoform 1 of CDP-diacylglycerol--inositol 3-phosphatidyltransferase          |
| 142 | IPI: IPI00647556.2 TREMBL: B7Z373;B7Z5V1;Q5T0I1;Q69YR8 ENSEMBL: ENSP00000377882;ENSP00000410657;ENSP00000411293 REFSEQ: NP_001121138;NP_001121139 VEGA: OTTHUMP00000022013 Tax_Id=9606 Gene_Symbol=GSN gelsolin isoform c                                               |
| 143 | IPI: IPI00655650.2 SWISS-PROT: P62854 TREMBL: Q5JVH5;Q75MH1;Q76N56;Q76N57 ENSEMBL: ENSP00000348849;ENSP00000450339 REFSEQ: NP_001020 H-INV: HIT000291153 Tax_Id=9606 Gene_Symbol=RPS26 40S ribosomal protein S26                                                        |
| 144 | IPI: IPI00743194.2 TREMBL: A2NJV5 ENSEMBL: ENSP00000417637 VEGA: OTTHUMP00000200286 Tax_Id=9606 Gene_Symbol=- Kappa light chain variable region (Fragment)                                                                                                              |
| 145 | IPI: IPI00784376.2 SWISS-PROT: Q9UDX5-1 ENSEMBL: ENSP00000266263 REFSEQ: NP_057582 VEGA: OTTHUMP00000199027 Tax_Id=9606 Gene_Symbol=MTFP1 Isoform 1 of Mitochondrial fission process protein 1                                                                          |
| 146 | IPI: IPI00794777.1 TREMBL: A6NIW5 ENSEMBL: ENSP00000334063 VEGA: OTTHUMP00000165825 Tax_Id=9606 Gene_Symbol=PRDX2 Uncharacterized protein                                                                                                                               |
| 147 | IPI: IPI00908449.1 TREMBL: B4DW90;E7EUT8 ENSEMBL: ENSP00000392027 Tax_Id=9606 Gene_Symbol=SF3A3 cDNA FLJ58737, highly similar to Splicing factor 3A subunit 3                                                                                                           |
| 148 | IPI: IPI00916600.1 TREMBL: E7EMB3 ENSEMBL: ENSP00000387065 VEGA: OTTHUMP00000202342 Tax_Id=9606 Gene_Symbol=CALM3;CALM2;CALM1 Uncharacterized                                                                                                                           |
| 149 | IPI: IPI00917181.1 TREMBL: B2REA7 ENSEMBL: ENSP00000397659 VEGA: OTTHUMP00000201955 Tax_Id=9606 Gene_Symbol=RPL36A Ribosomal protein L36a                                                                                                                               |
| 150 | IPI: IPI00946150.1 TREMBL: B4E2P2 ENSEMBL: ENSP00000420641 VEGA: OTTHUMP00000213167 Tax_Id=9606 Gene_Symbol=SSR3 cDNA FLJ52061, highly similar to Translocon-associated protein subunit gamma                                                                           |
| 151 | IPI: IPI00968238.1 TREMBL: B4DDD2 ENSEMBL: ENSP00000421334 VEGA: OTTHUMP00000222283 Tax_Id=9606 Gene_Symbol=DHFRP1;DHFR cDNA FLJ53008, highly similar to Dihydrofolate reductase                                                                                        |
| 152 | IPI: IPI01022268.1 TREMBL: F8W1R7 ENSEMBL: ENSP00000446687 Tax_Id=9606 Gene_Symbol=MYL6 Uncharacterized protein                                                                                                                                                         |
| 153 | IPI: IPI00911039.1 TREMBL: B4DFN9;B4E3B6 Tax_Id=9606 Gene_Symbol=HSPA1B;HSPA1A cDNA FLJ54408, highly similar to Heat shock 70 kDa protein 1                                                                                                                             |
| 154 | IPI: IPI01022048.1 TREMBL: F8VTY8 ENSEMBL: ENSP00000448081 Tax_Id=9606 Gene_Symbol=PA2G4 Uncharacterized protein                                                                                                                                                        |
| 155 | IPI: IPI00018768.1 SWISS-PROT: Q15631 TREMBL: Q53GR3 ENSEMBL: ENSP00000374332 REFSEQ: NP_004613 H-INV: HIT000323672 VEGA: OTTHUMP00000203714 Tax_Id=9606 Gene_Symbol=TSN Translin                                                                                       |
| 156 | IPI: IPI00219217.3 SWISS-PROT: P07195 TREMBL: Q5U077 ENSEMBL: ENSP00000229319;ENSP00000379386 REFSEQ: NP_001167568;NP_002291 H-INV: HIT000037014 VEGA: OTTHUMP00000165228;OTTHUMP00000165229 Tax_Id=9606 Gene_Symbol=LDHB L-lactate dehydrogenase B chain               |
| 157 | IPI: IPI00007427.2 TREMBL: B2R7D7;Q4JM47;Q53G64 ENSEMBL: ENSP00000388342 Tax_Id=9606 Gene_Symbol=AGR2 AGR2                                                                                                                                                              |
| 158 | IPI: IPI00024919.3 SWISS-PROT: P30048 TREMBL: A4UCS5;Q53HC2 ENSEMBL: ENSP00000298510 REFSEQ: NP_006784 H-INV: HIT000039251 VEGA: OTTHUMP00000020590 Tax_Id=9606 Gene_Symbol=PRDX3 Thioredoxin-dependent peroxide reductase, mitochondrial                               |
| 159 | IPI: IPI00239077.5 SWISS-PROT: P49773 ENSEMBL: ENSP00000304229 REFSEQ: NP_005331 H-INV: HIT000033040 VEGA: OTTHUMP00000159244 Tax_Id=9606 Gene_Symbol=HINT1 Histidine triad nucleotide-binding protein 1                                                                |

|     |                                                                                                                                                                                                                                                  |
|-----|--------------------------------------------------------------------------------------------------------------------------------------------------------------------------------------------------------------------------------------------------|
| 160 | IPI: IPI00418471.6 SWISS-PROT: P08670 TREMBL: Q53HU8 ENSEMBL: ENSP00000224237; ENSP00000446007 REFSEQ: NP_003371 H-INV: HIT000262376 VEGA: OTTHUMP00000019224 Tax_Id=9606 Gene_Symbol=VIM Vimentin                                               |
| 161 | IPI: IPI00878517.1 TREMBL: B7WNR0 ENSEMBL: ENSP00000384695 VEGA: OTTHUMP00000196832 Tax_Id=9606 Gene_Symbol=ALB Uncharacterized protein                                                                                                          |
| 162 | IPI: IPI00937471.1 SWISS-PROT: O00410-2 Tax_Id=9606 Gene_Symbol=IPO5 Isoform 2 of Importin-5                                                                                                                                                     |
| 163 | IPI: IPI00939159.6 TREMBL: B4DNA3; B4DUZ8; E7ENY9; Q5TOR8 ENSEMBL: ENSP00000389974 VEGA: OTTHUMP0000004831 Tax_Id=9606 Gene_Symbol=CAP1 Adenylyl cyclase-associated protein                                                                      |
| 164 | IPI: IPI00981169.1 TREMBL: B7ZAT2; Q9H369 ENSEMBL: ENSP00000445471 REFSEQ: NP_001185771 Tax_Id=9606 Gene_Symbol=CCT2 T-complex protein 1 subunit beta isoform                                                                                    |
| 165 | IPI: IPI01009588.1 SWISS-PROT: Q15063-3 ENSEMBL: ENSP00000437959 REFSEQ: NP_001129407 Tax_Id=9606 Gene_Symbol=POSTN Isoform 3 of Periostin                                                                                                       |
| 166 | IPI: IPI00001159.11 SWISS-PROT: Q92616 TREMBL: B4DM32; E1NZA1 ENSEMBL: ENSP00000300648 REFSEQ: NP_006827 H-INV: HIT000042355 Tax_Id=9606 Gene_Symbol=GCNL1 Translational activator GCN1                                                          |
| 167 | IPI: IPI00003327.1 SWISS-PROT: P36405 ENSEMBL: ENSP00000260746 REFSEQ: NP_004302 H-INV: HIT000217642 VEGA: OTTHUMP00000020373 Tax_Id=9606 Gene_Symbol=ARL3 ADP-ribosylation factor-like protein 3                                                |
| 168 | IPI: IPI00005969.3 SWISS-PROT: P52907 TREMBL: A8K0T9 ENSEMBL: ENSP00000263168 REFSEQ: NP_006126 H-INV: HIT000057385 VEGA: OTTHUMP00000013512 Tax_Id=9606 Gene_Symbol=CAPZA1 F-actin-capping protein subunit alpha-1                              |
| 169 | IPI: IPI00006865.4 SWISS-PROT: O75396 REFSEQ: NP_004883 H-INV: HIT000030350 Tax_Id=9606 Gene_Symbol=SEC22B Vesicle-trafficking protein SEC22b                                                                                                    |
| 170 | IPI: IPI00007611.1 SWISS-PROT: P48047 ENSEMBL: ENSP00000290299 REFSEQ: NP_001688 VEGA: OTTHUMP00000067745 Tax_Id=9606 Gene_Symbol=ATP5O ATP synthase subunit O, mitochondrial                                                                    |
| 171 | IPI: IPI00010271.3 SWISS-PROT: P63000-1 TREMBL: A4D2P1; A4D2P2 ENSEMBL: ENSP00000258737 REFSEQ: NP_008839 H-INV: HIT000303551 VEGA: OTTHUMP00000151196 Tax_Id=9606 Gene_Symbol=RAC1 Isoform A of Ras-related C3 botulinum toxin substrate 1      |
| 172 | IPI: IPI00010303.1 SWISS-PROT: P48594 TREMBL: A8K847; Q86W03; Q86W05 ENSEMBL: ENSP00000343445 REFSEQ: NP_002965 H-INV: HIT000037992 VEGA: OTTHUMP00000066807 Tax_Id=9606 Gene_Symbol=SERPINB4 Serpin B4                                          |
| 173 | IPI: IPI00010796.1 SWISS-PROT: P07237 TREMBL: B4DJS0 ENSEMBL: ENSP00000327801 REFSEQ: NP_000909 H-INV: HIT000040847 VEGA: OTTHUMP00000196834 Tax_Id=9606 Gene_Symbol=P4HB Protein disulfide-isomerase                                            |
| 174 | IPI: IPI00010951.2 SWISS-PROT: P58107 TREMBL: E9PPU0; Q9NSU9 ENSEMBL: ENSP00000436337 REFSEQ: NP_112598 H-INV: HIT000026013 VEGA: OTTHUMP00000228909 Tax_Id=9606 Gene_Symbol=EPPK1 Epiplakin                                                     |
| 175 | IPI: IPI00011698.4 SWISS-PROT: O00422 ENSEMBL: ENSP00000371973 REFSEQ: NP_005861 H-INV: HIT000270087 VEGA: OTTHUMP00000018107 Tax_Id=9606 Gene_Symbol=SAP18 histone deacetylase complex subunit SAP18                                            |
| 176 | IPI: IPI00011913.1 SWISS-PROT: Q13151 ENSEMBL: ENSP00000316042 REFSEQ: NP_006796 H-INV: HIT000038484 VEGA: OTTHUMP00000159432 Tax_Id=9606 Gene_Symbol=HNRNPA0 Heterogeneous nuclear ribonucleoprotein A0                                         |
| 177 | IPI: IPI00011916.1 SWISS-PROT: Q13155 TREMBL: B2R7M3 ENSEMBL: ENSP00000223029 REFSEQ: NP_006294 H-INV: HIT000275410 VEGA: OTTHUMP00000151158 Tax_Id=9606 Gene_Symbol=AIMP2 Aminoacyl tRNA synthase complex-interacting multifunctional protein 2 |
| 178 | IPI: IPI00012855.1 SWISS-PROT: P17152 TREMBL: B7Z587 ENSEMBL: ENSP00000319992 REFSEQ: NP_003867 H-INV: HIT000032335 Tax_Id=9606 Gene_Symbol=TMEM11 Transmembrane protein 11, mitochondrial                                                       |
| 179 | IPI: IPI00014198.3 SWISS-PROT: Q15024 TREMBL: B2RDZ9; B4DIU0 ENSEMBL: ENSP00000265564 REFSEQ: NP_055819 H-INV: HIT000035984 VEGA: OTTHUMP00000164126 Tax_Id=9606 Gene_Symbol=EXOSC7 Exosome complex component RRP42                              |
| 180 | IPI: IPI00017726.1 SWISS-PROT: Q99714-1 TREMBL: Q6IBS9 ENSEMBL: ENSP00000168216 REFSEQ: NP_004484 H-INV: HIT000222808 VEGA: OTTHUMP00000023348 Tax_Id=9606 Gene_Symbol=HSD17B10 Isoform 1 of 3-hydroxyacyl-CoA dehydrogenase type-2              |
| 181 | IPI: IPI00017964.1 SWISS-PROT: P62318 ENSEMBL: ENSP00000215829 REFSEQ: NP_004166 VEGA: OTTHUMP00000198379 Tax_Id=9606 Gene_Symbol=SNRPD3 Small nuclear ribonucleoprotein Sm D3                                                                   |
| 182 | IPI: IPI00018206.4 SWISS-PROT: P00505 TREMBL: A8K482; B3KUZ8 ENSEMBL: ENSP00000245206 REFSEQ: NP_002071 H-INV: HIT000194855 VEGA: OTTHUMP00000165254 Tax_Id=9606 Gene_Symbol=GOT2 Aspartate aminotransferase, mitochondrial                      |

|     |                                                                                                                                                                                                                                                                                                                                                                                                                                                                                            |
|-----|--------------------------------------------------------------------------------------------------------------------------------------------------------------------------------------------------------------------------------------------------------------------------------------------------------------------------------------------------------------------------------------------------------------------------------------------------------------------------------------------|
| 183 | IPI: IPI00018342.5 SWISS-PROT: P00568 TREMBL: Q6FGX9 ENSEMBL: ENSP00000362249; ENSP00000362271 REFSEQ: NP_000467 H-INV: HIT000336153 VEGA: OTTHUMP00000022217; OTTHUMP00000022218 Tax_Id=9606 Gene_Symbol=AK1 Adenylate kinase isoenzyme 1                                                                                                                                                                                                                                                 |
| 184 | IPI: IPI00021536.2 SWISS-PROT: Q9NZT1 TREMBL: Q53H37 ENSEMBL: ENSP00000369689 REFSEQ: NP_059118 H-INV: HIT000072441 VEGA: OTTHUMP00000019005 Tax_Id=9606 Gene_Symbol=CALML5 Calmodulin-like protein 5                                                                                                                                                                                                                                                                                      |
| 185 | IPI: IPI00024976.5 SWISS-PROT: Q9NS69 TREMBL: Q53GB0; Q549C5 ENSEMBL: ENSP00000216034 REFSEQ: NP_064628 H-INV: HIT000008005 VEGA: OTTHUMP000000198879 Tax_Id=9606 Gene_Symbol=TOMM22 Mitochondrial import receptor subunit TOM22 homolog                                                                                                                                                                                                                                                   |
| 186 | IPI: IPI00026185.7 SWISS-PROT: P47756-1 ENSEMBL: ENSP00000264202; ENSP00000364284 REFSEQ: NP_001193469 VEGA: OTTHUMP00000002654 Tax_Id=9606 Gene_Symbol=CAPZB Isoform 1 of F-actin-capping protein subunit beta                                                                                                                                                                                                                                                                            |
| 187 | IPI: IPI00026965.1 SWISS-PROT: P61077-1 ENSEMBL: ENSP00000318494; ENSP00000337208; ENSP00000344069; ENSP00000378280; ENSP00000378282; ENSP00000378283; ENSP00000396901 REFSEQ: NP_003331; NP_871615; NP_871616; NP_871617; NP_871618; NP_871619; NP_871620 H-INV: HIT000051962 VEGA: OTTHUMP00000161755; OTTHUMP00000161759; OTTHUMP00000161760; OTTHUMP00000216434; OTTHUMP00000219559; OTTHUMP00000219560 Tax_Id=9606 Gene_Symbol=UBE2D3 Isoform 1 of Ubiquitin-conjugating enzyme E2 D3 |
| 188 | IPI: IPI00027223.2 SWISS-PROT: O75874 TREMBL: B2R5M8; B4DXS4; Q0QER2; Q567U4; Q6FHQ6; Q6FI37; Q6FIA4 ENSEMBL: ENSP00000260985; ENSP00000390265; ENSP00000410513 REFSEQ: NP_005887 H-INV: HIT000287928 VEGA: OTTHUMP00000163870; OTTHUMP00000206464; OTTHUMP00000206466 Tax_Id=9606 Gene_Symbol=IDH1 Isocitrate dehydrogenase [NADP] cytoplasmic                                                                                                                                            |
| 189 | IPI: IPI00029266.1 SWISS-PROT: P62304 ENSEMBL: ENSP00000400591 REFSEQ: NP_003085 H-INV: HIT000334313 VEGA: OTTHUMP00000034219 Tax_Id=9606 Gene_Symbol=SNRPE Small nuclear ribonucleoprotein E                                                                                                                                                                                                                                                                                              |
| 190 | IPI: IPI00031804.1 SWISS-PROT: Q9Y277-1 ENSEMBL: ENSP00000022615 REFSEQ: NP_005653 H-INV: HIT000001729 VEGA: OTTHUMP00000226060 Tax_Id=9606 Gene_Symbol=VDAC3 Isoform 1 of Voltage-dependent anion-selective channel protein 3                                                                                                                                                                                                                                                             |
| 191 | IPI: IPI00032881.2 SWISS-PROT: Q9Y3D9 ENSEMBL: ENSP00000320184 REFSEQ: NP_057154 H-INV: HIT000301661 Tax_Id=9606 Gene_Symbol=MRPS23 28S ribosomal protein S23, mitochondrial                                                                                                                                                                                                                                                                                                               |
| 192 | IPI: IPI00163187.10 SWISS-PROT: Q16658 TREMBL: B3KTA3; Q96IH1 ENSEMBL: ENSP00000371798 REFSEQ: NP_003079 H-INV: HIT000217481 VEGA: OTTHUMP00000115718 Tax_Id=9606 Gene_Symbol=FSCN1 Fascin                                                                                                                                                                                                                                                                                                 |
| 193 | IPI: IPI00165230.1 SWISS-PROT: Q96EP5-1 TREMBL: B3KS63 ENSEMBL: ENSP00000233078 REFSEQ: NP_061832 H-INV: HIT000035629 Tax_Id=9606 Gene_Symbol=DAZAP1 Isoform 1 of DAZ-associated protein 1                                                                                                                                                                                                                                                                                                 |
| 194 | IPI: IPI00183530.2 SWISS-PROT: Q13596-1 TREMBL: Q53GY8; Q53HL9; Q6ZRJ8 ENSEMBL: ENSP00000369638 REFSEQ: NP_003090 H-INV: HIT000029549 Tax_Id=9606 Gene_Symbol=SNX1 cDNA FLJ46302 fis, clone TEST14036048, highly similar to Sorting nexin 1                                                                                                                                                                                                                                                |
| 195 | IPI: IPI00183603.3 SWISS-PROT: Q9NRP0 ENSEMBL: ENSP00000354676 REFSEQ: NP_067050 H-INV: HIT000272603 VEGA: OTTHUMP00000219604 Tax_Id=9606 Gene_Symbol=OSTCP1; OSTC Oligosaccharyltransferase complex subunit OSTC                                                                                                                                                                                                                                                                          |
| 196 | IPI: IPI00216691.5 SWISS-PROT: P07737 TREMBL: Q53Y44 ENSEMBL: ENSP00000225655 REFSEQ: NP_005013 H-INV: HIT000272364 VEGA: OTTHUMP00000125244 Tax_Id=9606 Gene_Symbol=PFN1 Profilin-1                                                                                                                                                                                                                                                                                                       |
| 197 | IPI: IPI00219219.3 SWISS-PROT: P09382 TREMBL: Q15954 ENSEMBL: ENSP00000215909 REFSEQ: NP_002296 H-INV: HIT000267445 VEGA: OTTHUMP00000198176 Tax_Id=9606 Gene_Symbol=LGALS1 Galectin-1                                                                                                                                                                                                                                                                                                     |
| 198 | IPI: IPI00219350.1 SWISS-PROT: P82912-2 Tax_Id=9606 Gene_Symbol=MRPS11 Isoform 2 of 28S ribosomal protein S11, mitochondrial                                                                                                                                                                                                                                                                                                                                                               |
| 199 | IPI: IPI00220214.2 SWISS-PROT: P24821-5 ENSEMBL: ENSP00000344555 Tax_Id=9606 Gene_Symbol=TNC Isoform 5 of Tenascin                                                                                                                                                                                                                                                                                                                                                                         |
| 200 | IPI: IPI00220834.8 SWISS-PROT: P13010 TREMBL: Q53T09; Q53TC2 ENSEMBL: ENSP00000375977; ENSP00000375978 REFSEQ: NP_066964 H-INV: HIT000195394 VEGA: OTTHUMP00000164061 Tax_Id=9606 Gene_Symbol=XRCC5 X-ray repair cross-complementing protein 5                                                                                                                                                                                                                                             |
| 201 | IPI: IPI002290738.4 SWISS-PROT: Q13492-1 TREMBL: A8K5U9; A8MX97; Q4LE54 ENSEMBL: ENSP00000377015; ENSP00000396321 REFSEQ: NP_009097 H-INV: HIT000098930 VEGA: OTTHUMP00000234633 Tax_Id=9606 Gene_Symbol=PICALM Isoform 1 of Phosphatidylinositol-binding clathrin assembly protein                                                                                                                                                                                                        |

|     |                                                                                                                                                                                                                                                                                                                                                                                                                                                                                                                                                                                                                                                                                                                                                                                                                                                                                                                                                                                                                                                                                                                                                                                                                                                                                                                                                                                 |
|-----|---------------------------------------------------------------------------------------------------------------------------------------------------------------------------------------------------------------------------------------------------------------------------------------------------------------------------------------------------------------------------------------------------------------------------------------------------------------------------------------------------------------------------------------------------------------------------------------------------------------------------------------------------------------------------------------------------------------------------------------------------------------------------------------------------------------------------------------------------------------------------------------------------------------------------------------------------------------------------------------------------------------------------------------------------------------------------------------------------------------------------------------------------------------------------------------------------------------------------------------------------------------------------------------------------------------------------------------------------------------------------------|
| 202 | IPI: IPI00291510.3 SWISS-PROT: P12268 TREMBL: B7Z1G4 ENSEMBL: ENSP00000321584 REFSEQ: NP_000875 H-INV: HIT000032622 VEGA: OTTHUMP00000210555<br>Tax_Id=9606 Gene_Symbol=IMPDH2 Inosine-5'-monophosphate dehydrogenase 2                                                                                                                                                                                                                                                                                                                                                                                                                                                                                                                                                                                                                                                                                                                                                                                                                                                                                                                                                                                                                                                                                                                                                         |
| 203 | IPI: IPI00300299.6 SWISS-PROT: P61009 TREMBL: D3DP46 ENSEMBL: ENSP00000427463 REFSEQ: NP_068747 H-INV: HIT000009576 VEGA: OTTHUMP00000218989<br>Tax_Id=9606 Gene_Symbol=SPCS3 Signal peptidase complex subunit 3                                                                                                                                                                                                                                                                                                                                                                                                                                                                                                                                                                                                                                                                                                                                                                                                                                                                                                                                                                                                                                                                                                                                                                |
| 204 | IPI: IPI00302592.2 SWISS-PROT: P21333-<br>2 TREMBL: Q60FE6; Q6NXF2; Q8TES4 ENSEMBL: ENSP00000353467; ENSP00000416926 REFSEQ: NP_001447 VEGA: OTTHUMP0000024320 Tax_Id=9606 Gene_Symbol=FLNA<br>Isoform 2 of Filamin-A                                                                                                                                                                                                                                                                                                                                                                                                                                                                                                                                                                                                                                                                                                                                                                                                                                                                                                                                                                                                                                                                                                                                                           |
| 205 | IPI: IPI00304082.8 SWISS-PROT: Q96CN7 ENSEMBL: ENSP00000173527 REFSEQ: NP_057132 H-INV: HIT000036522 VEGA: OTTHUMP00000223219 Tax_Id=9606<br>Gene_Symbol=ISOC1 Isochorismatase domain-containing protein 1                                                                                                                                                                                                                                                                                                                                                                                                                                                                                                                                                                                                                                                                                                                                                                                                                                                                                                                                                                                                                                                                                                                                                                      |
| 206 | IPI: IPI00328840.9 TREMBL: E9PB61 ENSEMBL: ENSP00000421592 REFSEQ: NP_005773 H-INV: HIT000053776 VEGA: OTTHUMP00000218275 Tax_Id=9606<br>Gene_Symbol=THOC4 THO complex subunit 4                                                                                                                                                                                                                                                                                                                                                                                                                                                                                                                                                                                                                                                                                                                                                                                                                                                                                                                                                                                                                                                                                                                                                                                                |
| 207 | IPI: IPI00329025.1 SWISS-PROT: Q8N5M9 ENSEMBL: ENSP00000306106 REFSEQ: NP_115881 H-INV: HIT000081795 VEGA: OTTHUMP00000158646 Tax_Id=9606<br>Gene_Symbol=JAGN1 Protein jagunal homolog 1                                                                                                                                                                                                                                                                                                                                                                                                                                                                                                                                                                                                                                                                                                                                                                                                                                                                                                                                                                                                                                                                                                                                                                                        |
| 208 | IPI: IPI00332950.5 SWISS-PROT: Q9NR50-3 Tax_Id=9606 Gene_Symbol=EIF2B3 Isoform 3 of Translation initiation factor eIF-2B subunit gamma                                                                                                                                                                                                                                                                                                                                                                                                                                                                                                                                                                                                                                                                                                                                                                                                                                                                                                                                                                                                                                                                                                                                                                                                                                          |
| 209 | IPI: IPI00335069.2 TREMBL: A6NP15 ENSEMBL: ENSP00000349667 REFSEQ: NP_777360 VEGA: OTTHUMP00000179136 Tax_Id=9606 Gene_Symbol=PSMD12 26S proteasome<br>non-ATPase regulatory subunit 12 isoform 2                                                                                                                                                                                                                                                                                                                                                                                                                                                                                                                                                                                                                                                                                                                                                                                                                                                                                                                                                                                                                                                                                                                                                                               |
| 210 | IPI: IPI00376215.2 SWISS-PROT: P78527-<br>2 TREMBL: B4DL41; E7EUY0 ENSEMBL: ENSP00000345182; ENSP00000442177 REFSEQ: NP_001075109 VEGA: OTTHUMP00000237534 Tax_Id=9606 Gene_Symbol=PRKDC                                                                                                                                                                                                                                                                                                                                                                                                                                                                                                                                                                                                                                                                                                                                                                                                                                                                                                                                                                                                                                                                                                                                                                                        |
| 211 | IPI: IPI00395605.4 SWISS-PROT: Q92888-3 ENSEMBL: ENSP00000337261 REFSEQ: NP_945353 H-INV: HIT000042038 Tax_Id=9606 Gene_Symbol=ARHGEF1 Isoform 3 of Rho<br>guanine nucleotide exchange factor 1                                                                                                                                                                                                                                                                                                                                                                                                                                                                                                                                                                                                                                                                                                                                                                                                                                                                                                                                                                                                                                                                                                                                                                                 |
| 212 | IPI: IPI00395967.2 TREMBL: Q86XC5 ENSEMBL: ENSP00000338750 Tax_Id=9606 Gene_Symbol=TMEM97 Uncharacterized protein                                                                                                                                                                                                                                                                                                                                                                                                                                                                                                                                                                                                                                                                                                                                                                                                                                                                                                                                                                                                                                                                                                                                                                                                                                                               |
| 213 | IPI: IPI00410324.2 SWISS-PROT: Q3MHD2-1 ENSEMBL: ENSP00000293406 REFSEQ: NP_689557 H-INV: HIT000011832 Tax_Id=9606 Gene_Symbol=LSM12 Isoform 1 of Protein<br>LSM12 homolog                                                                                                                                                                                                                                                                                                                                                                                                                                                                                                                                                                                                                                                                                                                                                                                                                                                                                                                                                                                                                                                                                                                                                                                                      |
| 214 | IPI: IPI00432865.1 SWISS-PROT: Q6NVV1 H-INV: HIT000262858 Tax_Id=9606 Gene_Symbol=RPL13AP3 Putative 60S ribosomal protein L13a-like MGC87657                                                                                                                                                                                                                                                                                                                                                                                                                                                                                                                                                                                                                                                                                                                                                                                                                                                                                                                                                                                                                                                                                                                                                                                                                                    |
| 215 | IPI: IPI00453473.6 SWISS-<br>PROT: P62805 TREMBL: B2R4R0; Q0VAS5; Q6B823 ENSEMBL: ENSP00000289352; ENSP00000343282; ENSP00000346316; ENSP00000347168; ENSP00000348258; ENSP00000350<br>159; ENSP00000350767; ENSP00000352980; ENSP00000353624; ENSP00000358153; ENSP00000358162; ENSP00000366581; ENSP00000366956; ENSP00000366974; ENSP00000367<br>034; ENSP00000376663; ENSP00000376664; ENSP00000376668; ENSP00000376669; ENSP00000443017 REFSEQ: NP_001029249; NP_003486; NP_003529; NP_003530; NP_003531;<br>NP_003532; NP_003533; NP_003534; NP_003535; NP_003536; NP_003537; NP_003539; NP_068803; NP_778224 H-<br>INV: HIT000035884; HIT000037968; HIT000039019; HIT000263543; HIT000263618; HIT000263805; HIT000265621; HIT000334738; HIT000386584; HIT000388136; HIT000389632; HIT<br>000390348 VEGA: OTTHUMP0000013906; OTTHUMP0000013907; OTTHUMP0000016134; OTTHUMP0000016136; OTTHUMP0000016140; OTTHUMP0000016146; OTTH<br>UMP0000016156; OTTHUMP0000016157; OTTHUMP0000016169; OTTHUMP0000016176; OTTHUMP0000016186; OTTHUMP0000016187; OTTHUMP0000017840; OTTH<br>UMPO0000194768; OTTHUMPO0000194769; OTTHUMPO0000194862; OTTHUMPO0000194863; OTTHUMPO0000239322; OTTHUMPO0000239323 Tax_Id=9606<br>Gene_Symbol=HIST2H4B; HIST1H4C; HIST1H4J; HIST1H4D; HIST1H4A; HIST2H4A; HIST1H4I; HIST1H4K; HIST1H4E; HIST1H4L; HIST1H4F; HIST1H4H; HIST1H4B<br>Histone H4 |
| 216 | IPI: IPI00465225.1 TREMBL: A6NIT8 ENSEMBL: ENSP00000373401; ENSP00000373402 REFSEQ: NP_001005335 Tax_Id=9606 Gene_Symbol=HNRNPL heterogeneous nuclear<br>ribonucleoprotein L isoform b                                                                                                                                                                                                                                                                                                                                                                                                                                                                                                                                                                                                                                                                                                                                                                                                                                                                                                                                                                                                                                                                                                                                                                                          |
| 217 | IPI: IPI00471928.6 TREMBL: A8K092; B4DGW3 ENSEMBL: ENSP00000440198 Tax_Id=9606 Gene_Symbol=ATP5A1 ATP synthase subunit alpha                                                                                                                                                                                                                                                                                                                                                                                                                                                                                                                                                                                                                                                                                                                                                                                                                                                                                                                                                                                                                                                                                                                                                                                                                                                    |
| 218 | IPI: IPI00477427.3 SWISS-PROT: P45378-2 ENSEMBL: ENSP00000278317 REFSEQ: NP_006748 VEGA: OTTHUMP00000014432 Tax_Id=9606 Gene_Symbol=TNNT3 Isoform 2 of<br>Troponin T, fast skeletal muscle                                                                                                                                                                                                                                                                                                                                                                                                                                                                                                                                                                                                                                                                                                                                                                                                                                                                                                                                                                                                                                                                                                                                                                                      |
| 219 | IPI: IPI00479058.2 SWISS-PROT: P62841 ENSEMBL: ENSP00000233609 REFSEQ: NP_001009 H-INV: HIT000338291 Tax_Id=9606 Gene_Symbol=RPS15 40S ribosomal protein S15                                                                                                                                                                                                                                                                                                                                                                                                                                                                                                                                                                                                                                                                                                                                                                                                                                                                                                                                                                                                                                                                                                                                                                                                                    |
| 220 | IPI: IPI00479915.16 SWISS-PROT: Q5VST9-5 ENSEMBL: ENSP00000352613; ENSP00000355667 H-INV: HIT000243960 VEGA: OTTHUMP00000037765 Tax_Id=9606<br>Gene_Symbol=OBSCN Isoform 4 of Obscurin                                                                                                                                                                                                                                                                                                                                                                                                                                                                                                                                                                                                                                                                                                                                                                                                                                                                                                                                                                                                                                                                                                                                                                                          |

|  |     |                                                                                                                                                                                                                                                                                                                                                                                                                                                                                                                                                                                                                                                                                                                                                                                                                                                                                                                                                                                                                                                                                                                                                                                                                                                                                                                                                                                                                           |
|--|-----|---------------------------------------------------------------------------------------------------------------------------------------------------------------------------------------------------------------------------------------------------------------------------------------------------------------------------------------------------------------------------------------------------------------------------------------------------------------------------------------------------------------------------------------------------------------------------------------------------------------------------------------------------------------------------------------------------------------------------------------------------------------------------------------------------------------------------------------------------------------------------------------------------------------------------------------------------------------------------------------------------------------------------------------------------------------------------------------------------------------------------------------------------------------------------------------------------------------------------------------------------------------------------------------------------------------------------------------------------------------------------------------------------------------------------|
|  | 221 | IPI:IPI00513896.3 TREMBL:B1AKV3 ENSEMBL:ENSP00000399713 VEGA:OTTHUMP00000030744 Tax_Id=9606 Gene_Symbol=UQCC Uncharacterized protein                                                                                                                                                                                                                                                                                                                                                                                                                                                                                                                                                                                                                                                                                                                                                                                                                                                                                                                                                                                                                                                                                                                                                                                                                                                                                      |
|  | 222 | IPI:IPI00549248.4 SWISS-PROT:P06748-1 TREMBL:A4ZU86;Q9BT19 ENSEMBL:ENSP00000296930;ENSP00000428755 REFSEQ:NP_002511 H-INV:HIT000033829 VEGA:OTTHUMP00000161024;OTTHUMP00000223398 Tax_Id=9606 Gene_Symbol=NPM1 Isoform 1 of Nucleophosmin                                                                                                                                                                                                                                                                                                                                                                                                                                                                                                                                                                                                                                                                                                                                                                                                                                                                                                                                                                                                                                                                                                                                                                                 |
|  | 223 | IPI:IPI00556157.1 TREMBL:Q59H49 Tax_Id=9606 Gene_Symbol=PTBP1 Polypyrimidine tract-binding protein 1 isoform c variant (Fragment)                                                                                                                                                                                                                                                                                                                                                                                                                                                                                                                                                                                                                                                                                                                                                                                                                                                                                                                                                                                                                                                                                                                                                                                                                                                                                         |
|  | 224 | IPI:IPI00556611.1 SWISS-PROT:Q9NWU5-2 TREMBL:A6NGJ8 ENSEMBL:ENSP00000265229 REFSEQ:NP_001014990 VEGA:OTTHUMP00000226009 Tax_Id=9606 Gene_Symbol=MRPL22 39S ribosomal protein L22, mitochondrial isoform b                                                                                                                                                                                                                                                                                                                                                                                                                                                                                                                                                                                                                                                                                                                                                                                                                                                                                                                                                                                                                                                                                                                                                                                                                 |
|  | 225 | IPI:IPI00642982.1 TREMBL:A4VCH6;F5GZ27 ENSEMBL:ENSP00000441523 Tax_Id=9606 Gene_Symbol=LONP1 Lon protease homolog                                                                                                                                                                                                                                                                                                                                                                                                                                                                                                                                                                                                                                                                                                                                                                                                                                                                                                                                                                                                                                                                                                                                                                                                                                                                                                         |
|  | 226 | IPI:IPI00643830.2 TREMBL:C9JEH7 ENSEMBL:ENSP00000415317 VEGA:OTTHUMP00000034364 Tax_Id=9606 Gene_Symbol=RPS4Y1 Uncharacterized protein                                                                                                                                                                                                                                                                                                                                                                                                                                                                                                                                                                                                                                                                                                                                                                                                                                                                                                                                                                                                                                                                                                                                                                                                                                                                                    |
|  | 227 | IPI:IPI00644079.4 TREMBL:B3KX72;Q5RI18;Q5RI19;Q7Z4Q5 ENSEMBL:ENSP00000410728;ENSP00000416455 VEGA:OTTHUMP00000038194 Tax_Id=9606 Gene_Symbol=HNRNPU cDNA FLJ44920 fis, clone BRAMY3011501, highly similar to Heterogeneous nuclear ribonucleoprotein U                                                                                                                                                                                                                                                                                                                                                                                                                                                                                                                                                                                                                                                                                                                                                                                                                                                                                                                                                                                                                                                                                                                                                                    |
|  | 228 | IPI:IPI00644813.1 TREMBL:Q5TAL2 ENSEMBL:ENSP00000363130 VEGA:OTTHUMP00000016240 Tax_Id=9606 Gene_Symbol=SNRPC Uncharacterized protein                                                                                                                                                                                                                                                                                                                                                                                                                                                                                                                                                                                                                                                                                                                                                                                                                                                                                                                                                                                                                                                                                                                                                                                                                                                                                     |
|  | 229 | IPI:IPI00646304.4 SWISS-PROT:P23284 ENSEMBL:ENSP00000300026 REFSEQ:NP_000933 H-INV:HIT000034019 VEGA:OTTHUMP00000163975 Tax_Id=9606 Gene_Symbol=PPIB Peptidyl-prolyl cis-trans isomerase B                                                                                                                                                                                                                                                                                                                                                                                                                                                                                                                                                                                                                                                                                                                                                                                                                                                                                                                                                                                                                                                                                                                                                                                                                                |
|  | 230 | IPI:IPI00646656.4 TREMBL:B4DG16 ENSEMBL:ENSP00000442496 Tax_Id=9606 Gene_Symbol=NARS cDNA FLJ52485, highly similar to Asparaginyl-tRNA synthetase,                                                                                                                                                                                                                                                                                                                                                                                                                                                                                                                                                                                                                                                                                                                                                                                                                                                                                                                                                                                                                                                                                                                                                                                                                                                                        |
|  | 231 | IPI:IPI00654820.2 SWISS-PROT:P00846 TREMBL:A0S0T0;A0S0Z5;A0S1G1;A0S2B3;A0S2H8;A0S2R9;A0S2V8;A0S3K5;A0S3X2;A0S437;A0S525;A0S590;A0SB36;A0SBS0;A0SBX2;A0SCX3;A1DTA5;A1DTI3;A1DV99;A1DVF1;A1E1E3;A1E1T6;A1Z496;A1Z4E8;A1Z4G1;A1Z4L3;A1Z519;A3FPA1;A3R0R5;A4GWW2;A4GYNO;A4LB80;A4ZLA9;A4ZLL3;A4ZM04;A4ZM68;A4ZYE7;A5JYK3;A6YUI6;A6YUS7;A6YUU0;A6YVN9;A6YVQ2;A6YVS8;A6YW31;A6YW69;A6YWX8;A6YX94;A6YXS6;A6YYN7;A6Z2Z4;A6Z4T0;A6Z571;A6Z659;A6Z698;A6Z6R7;A6Z7D7;A6Z7G3;A6ZB88;A6ZC37;A6ZCZ8;A6ZEL8;A6ZET3;A6ZEV9;A6ZF88;A6ZFB4;A6ZG24;A6ZGJ0;A6ZHM2;A6ZHP8;A6ZIR4;A7LDA2;A7XSM8;A7XTK2;A7XTZ0;A7XUC2;A8JLH9;A8QT67;A8QTE5;A8R1T6;A8WDK6;A8WE09;A8WF83;B0EWL8;B0Z6X9;B1NTU9;B1NU66;B1NUN5;B1PI24;B1PIH2;B1W8I7;B2CB26;B2CB39;B2D0N3;B2D398;B2D3Q0;B2D4T1;B2D5C6;B2KLD7;B2KLM8;B2KLT0;B2KLZ5;B2MXH9;B2MYP5;B2MZ39;B2MZ69;B2WS29;B2XEH8;B2XEL7;B2XER9;B2XEZ6;B2XFD8;B2XG09;B2XGZ3;B2XHD6;B2XHM6;B2XI44;B2XK18;B2XKM6;B2XKN9;B2XKS8;B2XM45;B2XNF9;B2XNN7;B2XQ41;B2Y9B5;B2Y9P5;B2YAA3;B2YBN4;B2YI96;B2Z4U9;B2Z592;B2Z680;B3DE47;B3DE99;B4YBA8;B4YBC1;B4YD67;B4YG72;B5M7I3;B5M7X6;B5M880;B6RGC6;B7TCM6;B7TPA5;B7ZIX9;B8R3B7;B8RFM5;B8X4J0;B8X5R9;B8XYH1;B8XZR3;B9EDU5;B9EDY4;B9EEV9;B9EFL9;B9EFX3;B9U5J9;COLJY4;COLU52;C5MN37;C7AAU4;C7B333;C7B3W8;C7SJA0;C7SJU5;C8CCX8;C8CCZ1;C8XV02;C8XV28;C8Y007;C8Y0Y2;C8Y3I8;C8Y5I4;C8Y6T6;C8YCE9;C8YDR7;C8YFB3;C8YGB4;C8YHY6;C8YI12;C9D5C7;C9D5T3;C9D637;C9D6E1;D0UTS2;D0UTW1;D0UTX4;D0V1V0;D0V |
|  | 232 | IPI:IPI00658024.1 TREMBL:A6NJD9 ENSEMBL:ENSP00000370925 VEGA:OTTHUMP00000014440 Tax_Id=9606 Gene_Symbol=MRPL23 Uncharacterized protein                                                                                                                                                                                                                                                                                                                                                                                                                                                                                                                                                                                                                                                                                                                                                                                                                                                                                                                                                                                                                                                                                                                                                                                                                                                                                    |
|  | 233 | IPI:IPI00744168.2 H-INV:HIT000092031 Tax_Id=9606 Gene_Symbol=- Similar to Sodium- and chloride-dependent betaine transporter                                                                                                                                                                                                                                                                                                                                                                                                                                                                                                                                                                                                                                                                                                                                                                                                                                                                                                                                                                                                                                                                                                                                                                                                                                                                                              |
|  | 234 | IPI:IPI00745800.1 REFSEQ:NP_001034936 Tax_Id=9606 Gene_Symbol=GPX4 phospholipid hydroperoxide glutathione peroxidase, mitochondrial isoform B precursor                                                                                                                                                                                                                                                                                                                                                                                                                                                                                                                                                                                                                                                                                                                                                                                                                                                                                                                                                                                                                                                                                                                                                                                                                                                                   |
|  | 235 | IPI:IPI00759596.1 SWISS-PROT:P07910-4 ENSEMBL:ENSP00000450629 Tax_Id=9606 Gene_Symbol=HNRNPC Isoform 4 of Heterogeneous nuclear ribonucleoproteins C1/C2                                                                                                                                                                                                                                                                                                                                                                                                                                                                                                                                                                                                                                                                                                                                                                                                                                                                                                                                                                                                                                                                                                                                                                                                                                                                  |
|  | 236 | IPI:IPI00760620.2 H-INV:HIT000295248 Tax_Id=9606 Gene_Symbol=HNRNPA1P10 Similar to Heterogeneous nuclear ribonucleoprotein A1 isoform a                                                                                                                                                                                                                                                                                                                                                                                                                                                                                                                                                                                                                                                                                                                                                                                                                                                                                                                                                                                                                                                                                                                                                                                                                                                                                   |
|  | 237 | IPI:IPI00784891.1 SWISS-PROT:Q7Z3D4-3 ENSEMBL:ENSP00000427020 H-INV:HIT000306811 VEGA:OTTHUMP00000222490 Tax_Id=9606 Gene_Symbol=LYSMD3 Isoform 3 of LysM and putative peptidoglycan-binding domain-containing protein 3                                                                                                                                                                                                                                                                                                                                                                                                                                                                                                                                                                                                                                                                                                                                                                                                                                                                                                                                                                                                                                                                                                                                                                                                  |
|  | 238 | IPI:IPI00790695.1 ENSEMBL:ENSP00000430506 VEGA:OTTHUMP00000227632 Tax_Id=9606 Gene_Symbol=RPL30 6 kDa protein                                                                                                                                                                                                                                                                                                                                                                                                                                                                                                                                                                                                                                                                                                                                                                                                                                                                                                                                                                                                                                                                                                                                                                                                                                                                                                             |
|  | 239 | IPI:IPI00791306.1 ENSEMBL:ENSP00000376156 VEGA:OTTHUMP00000179172 Tax_Id=9606 Gene_Symbol=CCDC57 Protein                                                                                                                                                                                                                                                                                                                                                                                                                                                                                                                                                                                                                                                                                                                                                                                                                                                                                                                                                                                                                                                                                                                                                                                                                                                                                                                  |
|  | 240 | IPI:IPI00795303.2 TREMBL:B4DMJ6;E7EWF1 ENSEMBL:ENSP00000412939 Tax_Id=9606 Gene_Symbol=RPL4 cDNA FLJ50996, highly similar to 60S ribosomal protein L4                                                                                                                                                                                                                                                                                                                                                                                                                                                                                                                                                                                                                                                                                                                                                                                                                                                                                                                                                                                                                                                                                                                                                                                                                                                                     |
|  | 241 | IPI:IPI00797850.2 SWISS-PROT:Q02750-2 ENSEMBL:ENSP00000400158 VEGA:OTTHUMP00000174459 Tax_Id=9606 Gene_Symbol=MAP2K1 Isoform 2 of Dual specificity mitogen-activated protein kinase kinase 1                                                                                                                                                                                                                                                                                                                                                                                                                                                                                                                                                                                                                                                                                                                                                                                                                                                                                                                                                                                                                                                                                                                                                                                                                              |
|  | 242 | IPI:IPI00807545.1 SWISS-PROT:P61978-3 Tax_Id=9606 Gene_Symbol=HNRNPK Isoform 3 of Heterogeneous nuclear ribonucleoprotein K                                                                                                                                                                                                                                                                                                                                                                                                                                                                                                                                                                                                                                                                                                                                                                                                                                                                                                                                                                                                                                                                                                                                                                                                                                                                                               |
|  | 243 | IPI:IPI00827717.2 SWISS-PROT:Q13557-3 ENSEMBL:ENSP00000378034;ENSP00000423482 VEGA:OTTHUMP00000220386 Tax_Id=9606 Gene_Symbol=CAMK2D Isoform Delta 3 of Calcium/calmodulin-dependent protein kinase type II subunit delta                                                                                                                                                                                                                                                                                                                                                                                                                                                                                                                                                                                                                                                                                                                                                                                                                                                                                                                                                                                                                                                                                                                                                                                                 |



|     |                                                                                                                                                                                                                            |
|-----|----------------------------------------------------------------------------------------------------------------------------------------------------------------------------------------------------------------------------|
| 244 | IPI:IP100843996.1 TREMBL:B4E241 ENSEMBL:ENSP00000344762;ENSP00000436036 VEGA:OTTHUMP00000016295 Tax_Id=9606 Gene_Symbol=SRSF3 cDNA FLJ52832, highly similar to Splicing factor, arginine/serine-rich 3                     |
| 245 | IPI:IP100844578.1 SWISS-PROT:Q08211 TREMBL:B3KU66;Q12803;Q32Q22;Q6PK6 ENSEMBL:ENSP00000356520 REFSEQ:NP_001348 H-INV:HIT000385232 VEGA:OTTHUMP00000033287 Tax_Id=9606 Gene_Symbol=DHX9 ATP-dependent RNA helicase A        |
| 246 | IPI:IP100847793.1 TREMBL:A5JHP3 ENSEMBL:ENSP00000406773 Tax_Id=9606 Gene_Symbol=DCD Uncharacterized protein                                                                                                                |
| 247 | IPI:IP100853068.2 TREMBL:P78461;Q6J1Z9;Q86YL2;Q86YQ1;Q86YQ4;Q9NQT3 ENSEMBL:ENSP00000380899;ENSP00000380908;ENSP00000442364 VEGA:OTTHUMP00000194924;OTTHUMP00000194926 Tax_Id=9606 Gene_Symbol=HBA2;HBA1 Hemoglobin alpha-2 |
| 248 | IPI:IP100867533.1 TREMBL:Q8TBK5 H-INV:HIT000305529 Tax_Id=9606 Gene_Symbol=RPL6 60S ribosomal protein L6                                                                                                                   |
| 249 | IPI:IP100873122.2 TREMBL:F8WBP1;Q8TEL7 ENSEMBL:ENSP00000362385 Tax_Id=9606 Gene_Symbol=TTC16 Uncharacterized protein                                                                                                       |
| 250 | IPI:IP100877635.1 TREMBL:Q49AJ9;Q8TBW1;Q9BT63;Q9NY85 ENSEMBL:ENSP00000386101 VEGA:OTTHUMP00000199075 Tax_Id=9606 Gene_Symbol=SNORD43;RPL3 Ribosomal protein L3, isoform CRA_b                                              |
| 251 | IPI:IP100908488.1 TREMBL:B4DX20 ENSEMBL:ENSP00000398044 REFSEQ:NP_001180458 Tax_Id=9606 Gene_Symbol=CCT6B T-complex protein 1 subunit zeta-2 isoform 2                                                                     |
| 252 | IPI:IP100908752.1 TREMBL:B4DDL4;E7EVE6 Tax_Id=9606 Gene_Symbol=CMCK1 cDNA FLJ53966, moderately similar to Homo sapiens cytidylate kinase (CMCK), mRNA                                                                      |
| 253 | IPI:IP100910019.3 TREMBL:B4DP93;E9PHL5 Tax_Id=9606 Gene_Symbol=MVP Uncharacterized protein                                                                                                                                 |
| 254 | IPI:IP100910575.1 TREMBL:B4DHP2 ENSEMBL:ENSP00000402385 Tax_Id=9606 Gene_Symbol=PTGES3 cDNA FLJ59888, moderately similar to Prostaglandin E synthase 3                                                                     |
| 255 | IPI:IP100910701.1 TREMBL:B4DR45;E7ETK8 Tax_Id=9606 Gene_Symbol=AARS cDNA FLJ61339, highly similar to Alanyl-tRNA synthetase                                                                                                |
| 256 | IPI:IP100910703.1 TREMBL:B4DVP6 Tax_Id=9606 Gene_Symbol=- cDNA FLJ60004, highly similar to Alpha-mannosidase 2C1                                                                                                           |
| 257 | IPI:IP100911088.1 TREMBL:B4DM63 ENSEMBL:ENSP00000376449 Tax_Id=9606 Gene_Symbol=ARPC3 cDNA FLJ51245, highly similar to Actin-related protein 2/3 complex subunit 3                                                         |
| 258 | IPI:IP100916188.1 ENSEMBL:ENSP00000349410 VEGA:OTTHUMP00000204512 Tax_Id=9606 Gene_Symbol=NCL 32 kDa protein                                                                                                               |
| 259 | IPI:IP100916517.2 ENSEMBL:ENSP00000386735 Tax_Id=9606 Gene_Symbol=HNRNPA2B1 28 kDa protein                                                                                                                                 |
| 260 | IPI:IP100921118.1 TREMBL:B7TY16 ENSEMBL:ENSP00000439828 Tax_Id=9606 Gene_Symbol=ACTN1 Actinin alpha 1 isoform 3                                                                                                            |
| 261 | IPI:IP100925601.1 TREMBL:B4DP06;E9PBU3;F5GWY2 ENSEMBL:ENSP00000415935;ENSP00000440523 VEGA:OTTHUMP00000206773 Tax_Id=9606 Gene_Symbol=ATIC Uncharacterized protein                                                         |
| 262 | IPI:IP100930678.1 ENSEMBL:ENSP00000375798 REFSEQ:NP_808210 Tax_Id=9606 Gene_Symbol=SNRPD2 small nuclear ribonucleoprotein Sm D2 isoform 2                                                                                  |
| 263 | IPI:IP100937615.2 SWISS-PROT:P26641 TREMBL:B4DSR4;Q2F838;Q2F840;Q53YD7 ENSEMBL:ENSP00000331901 REFSEQ:NP_001395 H-INV:HIT000049297 VEGA:OTTHUMP00000236167 Tax_Id=9606 Gene_Symbol=EEF1G Elongation factor 1-gamma         |
| 264 | IPI:IP100939377.2 TREMBL:B4DUE8 ENSEMBL:ENSP00000407902 Tax_Id=9606 Gene_Symbol=USHBP1 cDNA FLJ59431, highly similar to Homo sapiens Usher syndrome 1C binding protein 1 (USHBP1), mRNA                                    |
| 265 | IPI:IP100940637.2 TREMBL:B4DUL4 ENSEMBL:ENSP00000413121 Tax_Id=9606 Gene_Symbol=SEC11A cDNA FLJ51313, highly similar to Microsomal signal peptidase 18 kDa subunit                                                         |
| 266 | IPI:IP100947127.1 TREMBL:B7Z5E3 ENSEMBL:ENSP00000445175 REFSEQ:NP_001158886 Tax_Id=9606 Gene_Symbol=LDHA L-lactate dehydrogenase A chain isoform 3                                                                         |
| 267 | IPI:IP100947310.1 TREMBL:C9K0U8 ENSEMBL:ENSP00000419579 VEGA:OTTHUMP00000212290 Tax_Id=9606 Gene_Symbol=SSBP1 Uncharacterized protein                                                                                      |
| 268 | IPI:IP100964070.1 TREMBL:D6RA82 ENSEMBL:ENSP00000421015;ENSP00000423068 VEGA:OTTHUMP00000219237;OTTHUMP00000219238 Tax_Id=9606 Gene_Symbol=ANXA3 Uncharacterized protein                                                   |
| 269 | IPI:IP100964598.1 ENSEMBL:ENSP00000422917 VEGA:OTTHUMP00000217152 Tax_Id=9606 Gene_Symbol=COPB2 20 kDa protein                                                                                                             |
| 270 | IPI:IP100965722.2 TREMBL:B4DYC8;E7ENZ3 ENSEMBL:ENSP00000426923 VEGA:OTTHUMP00000220728 Tax_Id=9606 Gene_Symbol=CCT5 cDNA FLJ52361, highly similar to T-complex protein 1 subunit epsilon                                   |

|     |                                                                                                                                                                                                                        |
|-----|------------------------------------------------------------------------------------------------------------------------------------------------------------------------------------------------------------------------|
| 271 | IPI:IP100966860.1 TREMBL:B7Z3M5;E9PFI5;F5H4F9 ENSEMBL:ENSP00000423953;ENSP00000444951 VEGA:OTTHUMP00000220253 Tax_Id=9606<br>Gene_Symbol=SNORD73A;RPS3A Uncharacterized protein                                        |
| 272 | IPI:IP100973925.2 ENSEMBL:ENSP00000427846 VEGA:OTTHUMP00000227112 Tax_Id=9606 Gene_Symbol=MRPS28 Protein                                                                                                               |
| 273 | IPI:IP100976380.1 ENSEMBL:ENSP00000436307 VEGA:OTTHUMP00000229292 Tax_Id=9606 Gene_Symbol=C11orf30 Protein                                                                                                             |
| 274 | IPI:IP100976884.1 TREMBL:E9PL37 ENSEMBL:ENSP00000433366 VEGA:OTTHUMP00000230462 Tax_Id=9606 Gene_Symbol=CAPN1 Uncharacterized protein                                                                                  |
| 275 | IPI:IP100977430.1 TREMBL:B4DUR8 ENSEMBL:ENSP00000357244;ENSP00000431543 VEGA:OTTHUMP00000231497 Tax_Id=9606 Gene_Symbol=CCT3 cDNA, FLJ79286,<br>highly similar to T-complex protein 1 subunit gamma                    |
| 276 | IPI:IP100977658.1 SWISS-PROT:O15372 TREMBL:B4DJN9;Q5BKY2;Q61B98 ENSEMBL:ENSP00000429931 REFSEQ:NP_003747 VEGA:OTTHUMP00000227892 Tax_Id=9606<br>Gene_Symbol=EIF3H Eukaryotic translation initiation factor 3 subunit H |
| 277 | IPI:IP100979250.1 SWISS-PROT:P01834 TREMBL:Q0KKI6 ENSEMBL:ENSP00000374777 H-INV:HIT000334151 VEGA:OTTHUMP00000200366 Tax_Id=9606<br>Gene_Symbol=IGKC Ig kappa chain C region                                           |
| 278 | IPI:IP100979451.1 TREMBL:E5RH42 ENSEMBL:ENSP00000429920 VEGA:OTTHUMP00000224185 Tax_Id=9606 Gene_Symbol=G3BP1 Uncharacterized protein                                                                                  |
| 279 | IPI:IP100979506.1 TREMBL:B4DJP9 ENSEMBL:ENSP00000388991;ENSP00000412759 REFSEQ:NP_001177938;XP_003119132 Tax_Id=9606<br>Gene_Symbol=SRSF10;LOC100505793 serine/arginine-rich splicing factor 10 isoform 6              |
| 280 | IPI:IP100980124.1 H-INV:HIT000385300 Tax_Id=9606 Gene_Symbol=DUSP3 Conserved hypothetical protein                                                                                                                      |
| 281 | IPI:IP100981273.2 TREMBL:B3KMT0;B3KNB2;B3KVS1;F5H2T0 ENSEMBL:ENSP00000433514;ENSP00000439367 VEGA:OTTHUMP00000021871 Tax_Id=9606<br>Gene_Symbol=IKBKAP Uncharacterized protein                                         |
| 282 | IPI:IP100981333.1 TREMBL:E7EN40 ENSEMBL:ENSP00000427986 VEGA:OTTHUMP00000224934 Tax_Id=9606 Gene_Symbol=HNRNPH1 Uncharacterized protein                                                                                |
| 283 | IPI:IP100983309.1 TREMBL:E9PNQ1 ENSEMBL:ENSP00000432820 VEGA:OTTHUMP00000231295 Tax_Id=9606 Gene_Symbol=STT3A Uncharacterized protein                                                                                  |
| 284 | IPI:IP100983475.1 H-INV:HIT000328365 Tax_Id=9606 Gene_Symbol=- Similar to Hepatitis B virus receptor binding protein                                                                                                   |
| 285 | IPI:IP100984839.1 REFSEQ:NP_001180345 Tax_Id=9606 Gene_Symbol=DDX3X ATP-dependent RNA helicase DDX3X isoform 2                                                                                                         |
| 286 | IPI:IP101010020.1 TREMBL:B7ZAV6 ENSEMBL:ENSP00000438253;ENSP00000438964 Tax_Id=9606 Gene_Symbol=KPNB1 cDNA, FLJ79320, highly similar to Importin beta-1<br>subunit                                                     |
| 287 | IPI:IP101011723.1 TREMBL:B4DWW1 ENSEMBL:ENSP00000441808;ENSP00000448850 Tax_Id=9606 Gene_Symbol=ARL1 cDNA FLJ51704, highly similar to ADP-ribosylation<br>factor-like protein 1                                        |
| 288 | IPI:IP101011952.1 TREMBL:B4E3Q9 ENSEMBL:ENSP00000398894 Tax_Id=9606 Gene_Symbol=VCL cDNA FLJ59659, highly similar to Vinculin                                                                                          |
| 289 | IPI:IP101012004.1 TREMBL:B3KQT9;B4DDM1 ENSEMBL:ENSP00000443648 Tax_Id=9606 Gene_Symbol=PDIA3 cDNA PSEC0175 fis, clone OVARC1000169, highly similar to<br>Protein disulfide-isomerase A3                                |
| 290 | IPI:IP101012564.1 TREMBL:A1L180;B7Z9C0;F5H730 ENSEMBL:ENSP00000442838 Tax_Id=9606 Gene_Symbol=MYO1C cDNA FLJ52405, highly similar to Myosin Ic                                                                         |
| 291 | IPI:IP101012817.1 TREMBL:F5H459 ENSEMBL:ENSP00000446179 VEGA:OTTHUMP00000236881 Tax_Id=9606 Gene_Symbol=AP3S1 Uncharacterized protein                                                                                  |
| 292 | IPI:IP101013543.1 TREMBL:B4DUI5;B7Z5D8 ENSEMBL:ENSP00000443599 Tax_Id=9606 Gene_Symbol=TPI1;TPI1P1 Triosephosphate isomerase                                                                                           |
| 293 | IPI:IP101014863.1 SWISS-PROT:Q9BWD1 TREMBL:A8K4W5;Q59GW6 ENSEMBL:ENSP00000356015 REFSEQ:NP_005882 H-<br>INV:HIT000269377 VEGA:OTTHUMP00000017527 Tax_Id=9606 Gene_Symbol=ACAT2 Acetyl-CoA acetyltransferase, cytosolic |
| 294 | IPI:IP101024808.1 ENSEMBL:ENSP00000252576 Tax_Id=9606 Gene_Symbol=- 26 kDa protein                                                                                                                                     |
| 295 | IPI:IP101025425.1 ENSEMBL:ENSP00000451171 Tax_Id=9606 Gene_Symbol=PSMA6 Protein                                                                                                                                        |

**Table S3 List of antibodies for flow cytometry, immunoblot and immunofluorescence staining**

| <b>Flow cytometry</b>                                           |                |                          |                                                                 |                |                     |
|-----------------------------------------------------------------|----------------|--------------------------|-----------------------------------------------------------------|----------------|---------------------|
| Antibody                                                        | Catalog Number | Company                  | Antibody                                                        | Catalog Number | Company             |
| CD3e-biotin                                                     | 13-0031-85     | eBioscience              | Sca-1-PE                                                        | 12-5981-81     | eBioscience         |
| B220-biotin                                                     | 13-0452-85     | eBioscience              | c-Kit-APC                                                       | 17-1171-82     | eBioscience         |
| Ter119-biotin                                                   | 13-5921-85     | eBioscience              | CD34 eFluor® 450                                                | 48-0341-82     | eBioscience         |
| Gr-1-biotin                                                     | 13-5931-85     | eBioscience              | CD34-PE                                                         | 348057         | BD Biosciences      |
| CD135-biotin                                                    | 13-1351-85     | eBioscience              | CD48 eFluor® 450                                                | 48-0481-82     | eBioscience         |
| Sca-1-FITC                                                      | 11-5981-85     | eBioscience              | CD135-PE                                                        | 12-1351-82     | eBioscience         |
| CD3e-APC                                                        | 17-0031-82     | eBioscience              | CD150 PE-Cyanine7                                               | 25-1502-82     | eBioscience         |
| B220-PE                                                         | 12-0452-85     | eBioscience              | CD16/CD32 eFluor® 450                                           | 48-0161-82     | eBioscience         |
| Mac-1-APC                                                       | 17-0112-82     | eBioscience              | CD45.2-FITC                                                     | 11-0454-82     | eBioscience         |
| Mac-1-PE                                                        | 12-0112-82     | eBioscience              | CD45.2-APC                                                      | 17-0454-82     | eBioscience         |
| Gr-1-PE                                                         | 12-5931-82     | eBioscience              | CD45.1-PE                                                       | 12-0453-82     | eBioscience         |
| Streptavidin PerCP-Cyanine5.5                                   | 45-4317-82     | eBioscience              | α-FLAG®-Allophycocyanin                                         | PJ255          | Prozyme             |
| Imag Hematopoietic Progenitor Cell Enrichment Set               | 558451         | BD Biosciences           | LILRB2-PE                                                       | 12-5149-42     | eBioscience         |
| <b>Immunoblot and immunofluorescence staining</b>               |                |                          |                                                                 |                |                     |
| Antibody                                                        | Catalog Number | Company                  | Antibody                                                        | Catalog Number | Company             |
| Vps16b                                                          | ab125084       | abcam                    | Vps33b                                                          | SAB1101437     | Sigma               |
| Vps33b                                                          | sc-398322      | Santa Cruz Biotechnology | TSG101                                                          | 14497-1-AP     | Proteintech         |
| GDI2                                                            | 60078-1-Ig     | Proteintech              | Flot1                                                           | ab41927        | abcam               |
| ANGPTL2                                                         | AF1444         | R&D Systems              | ANGPTL3                                                         | AF136          | R&D Systems         |
| TPO                                                             | AY4394         | Abways                   | LDHA                                                            | 19987-1-AP     | Proteintech         |
| V5                                                              | B1005F         | Biodragon                | Flag                                                            | F1804          | Sigma               |
| HA                                                              | H9658          | Sigma                    | Strep II                                                        | A00626-40      | GenScript           |
| Fc                                                              | I2136          | Sigma                    | Rab11A                                                          | AY3813         | Abways              |
| Rab27A                                                          | AY3819         | Abways                   | β-actin                                                         | M1210-5        | HuaAn Biotechnology |
| α-tubulin                                                       | T5168          | Sigma                    | LAMP1                                                           | 55273-1-AP     | Proteintech         |
| CD63                                                            | ab193349       | abcam                    | CD63                                                            | 25682-1-AP     | Proteintech         |
| PKM2                                                            | D78A4          | CST                      | GM130                                                           | 11308-1-AP     | Proteintech         |
| GLUT1                                                           | 21829-1-AP     | Proteintech              | Goat anti-Rabbit IgG (H+L) Secondary Antibody, Alexa Fluor® 555 | A-21428        | Thermo Scientific   |
| Goat anti-Rabbit IgG (H+L) Secondary Antibody, Alexa Fluor® 488 | A-11008        | Thermo Scientific        | Goat anti-Mouse IgG (H+L) Secondary Antibody, Alexa Fluor® 488  | A-11029        | Thermo Scientific   |
| Donkey anti-Goat IgG (H+L) Secondary Antibody, Alexa Fluor® 488 | A-11055        | Thermo Scientific        | Goat anti-Mouse IgG (H+L) Secondary Antibody, Alexa Fluor® 555  | A-21424        | Thermo Scientific   |
